# Supplementary material for: Genome Sequence of the Lager Brewing Yeast, an Interspecies Hybrid
Source: PubMed Central journal article supplement — DNA Res. 2009 Mar 4;16(2):115–29. doi: 10.1093/dnares/dsp003 (PMC2673734; doi:10.1093/dnares/dsp003), 2009-03-04
Supplement: dsp003_1.pdf [file dsp003_1.pdf]

>27.8-F

CCACGGAAGTATATGGTGTCTGTCGAATTTGTAGTCTTTGAACTCTGTGGT  
TGGACCTTGATATTCTGTGTAACAAGGCATGAAGTTCCTGTGTACGCGT  
CTAGACTCCCGGTATCTTTAGTCATTGTGCCGTGTACGTATACTTGAGCG  
AGTACGTTTGCTTCTTCCTGTCTCTGTTTCAATCCTTTGCCTTGTAATTG  
GCTGAACTTCTTAACGCGTTTTGTTTTTCGATGAGGTCGAACGGGGACAC  
ACAAGCTAAGAATGATCAGGGGAATAAGGAATAACAATGCGTATTTTCAGG  
ATGAATGGAAACCATCCACTGATCTAACAATGAAAAAAAAAGCTTAATTG  
TTTTAAGCTTCTCACAGGAAATACATAGATAAGTTGATTGGCTAGCCAGG  
GGAGATGACGTTGGGCAAAAAGAGGTCCTACCCGGATTCTGAACCGGGGT  
TGTCGGATCAAACCGAAAGTGATAACCACTACACTATAGGACCAGAAC  
TTCTTGAGTTTCTAGAATTACCACTGTGTAATACAGACATTATTTAGAG  
CATTTACGGGGTGAAGGCACAGAATCTCGCATTTAACTAATCATTCTG  
GTATTGATACGTCTCGGATGCACATCCTGCAATAGGATTTGTAAATTTGT  
TACCAGTCTCTTGTGTTGAGTTATATTATTTCAATTCAAGCACGTTTTAAT  
TGCACTTTGGTTGGTGGATTTGTA CTCTCGGCTACAATGAGGGGGCAATCCA  
GTTGGAGATACCATCAGATAAGGCATGGTTTTAGAAATGAGTATTATTCTA  
AAGATAAAGTGCCATAAGGTGGTATCCCTCGCACGCAAATGACGTACAAC

CTGCAAAGACAGGAAACACACATAGGCAAGTAACACTGGAGTTCACGATG  
GGCACGTTAGTTGATTCCGCATCGAAGATGTTTATCGGCCATAGTTTGTT  
GCACATTCACTGATTTACGTAGTCGGTAGGAAAACACTTTTAGTCACCAT  
GTA CTGATTCATGATAGAAGCTACGGAGGCCGTTAATTCCCTGGCCTTTG  
CGACAACGCCCCCTGAACATTTACGCGCGTCACATCAAGCCGATAAGGCT  
GGCACAAATGCAAGCGAAGCTCATCGGGTGCTCATGATTAGGAGTCTTTC  
GTTTGTTTGTTTTTCTCCCTTATCCCCGCATTGAATTTTATCGCTTCTT  
TGAAATGGTTTTTTTTCCGATATATATATTGTCTCTCAATTTGCCCTC  
TGTATTTCTTTGAGAAAAACAACGGCGTACAAATTATGCGCCTTGCGCAG  
AGATAATTGGTGGGAAAGAATTGAGGGCTAGTAATATGTTGTCACTATCC  
TTCGTGAATGAAGAATGCGGTTGTAACGGAAAAAATTTACCTCTTATTT  
TTTATCTCGAAGTTTTTTCTATTGGTTTGTTGAGTAGTACGCAATGCAA  
TTGCCAAAAGGACATGGCATCTGGGCTACATTTAGCTATAGAACCTAAAT  
ATATGCGTTTATTGCAGCAATGAATTAACCTGCAGCAGCGGTGTTGTAAG  
TGGTCACTGATGGCATTCCCAAATGTAGACTTGATAATAGTGTGTCAAAC  
ACTTATTGATTGGATAGGTCTTGCAATTTACAATCGTGGCGCGTTGAGTA  
TGTGTGCGCACCTAGAAGTCGTAGGTCCTTGAAAAATCAGCCAAGCCGTA  
ACAGTTAACAACATTTTACTTGAAGAGCTCGTCTTTGTTTGCGGAGACAT

TAGCCTAACTGACAATTATTCACTGAAGCTATTCGAAGAATCGAACACAA  
CAGTTCGAAAATGATCTACTTAAATGCATTGTATGCAAGGCACATTAACA  
ATAGAATATACGGTGTTGGTCAATCAGAATTCGGCAAGGGGCCTGTTCAA  
TGGTAGGCGTCTTTGGCATTATTGAGCAGTATTTTAAATTTGCACCTTCT  
CGTTTTACAGCTCTTTTACCAGCTTAAAGTATAAATCCGAATTAACAATT  
TATGATAAACGCATTGAGATTATGTTAAAATCTCTCTTCAAAGAGATTG  
AATATGTATAGAGGCTTTGTTGAGGCAACTGATCTATAATTGCTTACCCT  
CTATAAAATTGCGAATAATCGAGCAAGTTTCACCGATATATGGGTATTGA  
GTTTAAGCTCCTGGAATTGTACCCATTGGTGGCTTATCATTATGGCTACA  
TACTTTACAATCGTCCGTGGCAGGATGATCTAGAGGAATACCTCAATTGA  
CCACTTCATTTATTAGTGGGCTACTTTGCTAGGTGCCTTTTGACAGGCAA  
TAAAATGTTTCTGGCGCAATTTCTGTAAGTATTAATGATTTGTAGCTAAA  
AAAATGCTTGGTTGATGCCCGTCAAAATATAATTGTTCACTCAGAACA  
CTAGTACGTCACTGTCTATAAGTTCGAAAGACTTCTGTAATACAATTATT  
GTAAAAATTATAATACCATACGTTTATGGGTTTGTATATTTTTCTTTAGC  
TTAAATAATCTGCCCTTCAATTATTTAAATACGAATGGATGAAATTTAG  
AAACAGAAAGTTTTTCATTAATGATTACGCTGGCCCATTGTCCTTGCTTA  
AATTTCTAATCACTTCTCATTCTCATGATTTTGGAAATTTTACAAGAAAC

AAACCTGTGGGGAGTGGTACGAAAATACTCATTAGTTAAAATACTCATTA  
GTTAATGCGTGATTCCACCAGACATGTGCTTAATTCTTAACAAGCATTTA  
CTGTTTGTCTTTGCTGTTTCAAAGATTGACCGATGTGTTTTTTTTTCT  
CGCATTATAATTCATGTTAGTATAGTCAAAGTGTGTGTAATCATCATAC  
GCCATTGTGCCAATAACCAGATTATGGTGATTGACATTTAATATTGTT  
AAACAGCTCTTTGCAATTTGACATATAGCTGTTATTCTCCATCGATATTA  
TACTATGTTTTCTCAACTTTAGTCCTCGTCACTAACAACGAGGGCTGGGT  
AACACAAAGAGAAAATTTGGATATAGTATTTGGTGTTGAAATACAATACAT  
ATGCGGCTCATGTTTCCCGCTCTCATGGTCCGAAAAAAAAAAGAACTGTTT  
CTTAAACTATACTGTCCGGGCAAACCTTTTCGCCTCCGGTAAGCTTTGTA  
AAAGCCCTTGATATCAGCGCGTCTTTGCAGCAGAAACAAAAAAGCAAAT  
CGAAAGGCCAGTCTCAAAAATAATTGGAACTTAGCATCACCCCTGTCT  
CTCAAGCTGTTACATACTACCACTACCGCTACAACCCAGCTTTACCCGGA  
TCATACAGATCTTAAGACAAATAAAATTTATAGAGACTTGTTTCAGTCATA  
CTCCTCTCTAAACTAGGCTCCGGCTCCTGCCAGTAATAGCCCACTTAGAA  
AGAAATAAAAAACAAATCAGACAACAAGGGCTTAATCTCAGCAGATCGTA  
ACAACAAGGCTACTCTACTGCTTACAATACCCCGTTGTACATCTAAGTCG  
TATACAAATGATTTATCCCCACGCAAATGACATTGCAATTCGCCAGCAA

GCACCCAAGGCCTTTCCGCCAAGTGCACCGTTGCTAGCCTGCTATGGTTC  
AGCGACGCCACAAGGACGCCTTATTCGTATCCATCTATGTTGTGTGGAGC  
AAAGAAATCACCGCGTTCTAGCATGGATTCTGACTTAG

>27.11-R

AGCATCGCCATCTGTCTCAAACATATGGTAACTTTAGAAGAGTAGAAATA  
TGAATAATATATGAATTGTGTATTTAGTATGTCTAAGAAATTCTGAGTAA  
AAACCCTATATAAAACTTTTTCTGTTAGACTCAATAATAAAAAAATGT  
ATTGTAATTCTGGTAATCAAAGTTATAATGCATGGTATACTTTTGTA  
ATAAATATTGGAATAAATGATGGACATGAAATTGGATATACTTCTTTTGA  
TAAGAGTAATAGCGCAGGACATTCTTGAGAAAAAAGGTAAAATATATTA  
ACATATTTTATATAAATGAAAATTAACATATGAATTAGAAAATAATAAG  
TAAAAAGAAATGATTTTAAGATCACTATGAATAGTTTGTGTGGTAAATTT  
GCAAAGAAATTGATGAACATCGTGTTAAAAGATGATATAAATTATAAGAA  
TTTAAATCAAGACTCAAACCTGTCACCGAAATTAATGGAAGCTGCAGCGCA  
AGAATTGATATTGTAATATAATCAATGAATGATAGCATATGGAAGGAAAA  
GCAGAATCATTTATAATGTTATGCAAATTACAAATTCCTCTTTGTGGAT  
TCCTAAATCCATGACGAGATATCTGGTATACGTGACATTGAGAAACAATG  
AAATCCCACAAATCATCATGCAATTTTACAGGTCATTGAAACAAAGATTA

TATTTAAATATAGAAGGGAAGTTACAGACTAAATACTCACTTTATTATTT  
ACAAAACCTTATAATCTGTGTTGAAACTATACACAGAGTAATCAAAAATAT  
GTTTCGATACTAGTATACTCACCAAAAAACTTCATTTTTAGTTACTTTCCT  
AGATTCGTTACTAAGCTCTTTTCCAAGTCCATACAAAAAAGAGAG  
TATAAATAGATGGGCGGGTGATAATTTGTAGTTAATAGATCGTGTTTTTA  
AAAAACAATTAGAAGGGATTTTGATTTTGTGTGATCAAAAAGTGGTTAAG  
GTTAAAAATATCGAGATATTTATATCCAATAAAATTTTTCTTACCAAAC  
TGTGTAATCATCGCCATTTTTCATAAAGTTTATTATTCTTTTTAATTTTT  
TGTTTTTACAATGTCAAAGAGTTATGACATTTAAAAGACACTTTTAATT  
CTTATTATTGATTTGTAACATTAATAAAATACTATTATATTCTATTAT  
AAGATCATATTCTACATTTTTTTTTATATTTTTCATATTCATTGTTTAAT  
TTTAGTATTTTCAACTTATAATCTTCTATTTCAATATCAGTATTTATATT  
GAATATTATTATTTTTCTTGAGTTATAATAGGTATCATTGGATCTTTTT  
TACTATACGTATTTATTTGGTCCGGACCAATGATATTTCTGTTATATATC  
CGTATGTATTTGATTGTAGCATTTCATTATTTTTTCATATTTTCTTTTTAA  
AATAGGTAATCCTCTTGAATGGACATAAAGTTTATTATTTTTATAAACTA  
AAAATTCTAATGTATGATTAATTCAGAGCTATGATAGTAAATATTTTCT  
TTAGTTTGATTTAATGTTTCAACTTTGATTAATTCTGTAAAAGATTCAAA

ATCATCTAAATCTTGTCTTCAGCTATTTTTGTCAAATCAGTTTTATTTT  
CAAAATAATTTTTTTTTGGTATTTAAGAGACTTTGTGTAGTTGGATATA  
TTCTGGTTGTCTTCAACTGCTTTCGCATGAAGCACCTTCAAACACTTTT  
CCTCATACTACTTTCCTATTGCTAAACCCCCACACCCACTCCGGGTAAA  
CCACCTTGTTGTGGGAGCGGAAACGGAAAAGTCATTGCGCATGGCTGTAG  
CACTTTTTACTAGAAAAGCTTTGTGTTTACTTACTAGTGTGTTGTGATCT  
ACGATTCTTATCAAAAGCTGTTGGTTATTTAGTAAGTCGTAAAATCTAAG  
AATAAATCGTTCTTTTTTAAATTATATAAAATATATAGAACACACGCTGA  
TTGGTTGTTTATATTGGACCCGGTGGTTCGGCCATTATGGGAACATGGAC  
AAAAAGTTTTTTATATGCTAATTTCTGGTCACTTAATTAATCTTTATCTT  
AAATTCTATAATTAATAATTTACCTACCAATAATGTGTATCATCTTAAGGA  
TGTTTGCATTCACTTACTCCAACATGATCAGTACCATATTAAGAATGTC  
CGTCATCACCTACTCCAATTTATCTGAATAGGTGTATATCCGTGTCACTC  
ATTCCAATAAAAACCAATAAGACTGGGTGTTAGCACTTCTTGCTTTAAAA  
AACACGTGATAATGTGCCATCGGTGGAGTTGTATTTAAAAATATGCATAC  
TCAGAAACAAAAAGTGCTATATTTAACAGTTTTATGCATTCTTCTTTGC  
GACCCTGGGATATCGCTTTGAATGATGTCTGAGTAGATAAGGAATTTGCC  
AATCGTCGTCAATCGTTGTCAGTCAACAGGGTTAGTGGGTAAGAGATGTA

CGCAGTTGATCGAACAAATCGGCAGGCAATTATTCCAGGATCATAATACA  
ATGATTGGAATTAAGTCAAGGCTTTCCAACGCTATGCTGTCAATATCACA  
CCATTACATAATCTATCCCCACATTTCTCAACCAAAGTTCAAAAATAGAG  
GTAATTTTCCGCAGTTTAGACCACTTCGTTAAAAAGGGGTACAGATCTTA  
TTGGAACGGGTTCAATTTGTCAATAAAAAGTGAGTGCCGGGGGTAACCGA  
TAACCATACATGAGAATAGAATAACGCCATTTACGCCTACCGACTAAGAC  
AATTTACTGAATTTAGTGGTTAGATTCAGATTGAAATATTTCTTGACTC  
AATTTACAAACACCAAGACTAGATGGGCAAATCCAGCCATTCGCATACCC  
TATTAATTCACAGGCGAGCAGAATGATTCAGTGTGCCTCTCGTAAAC  
AAAACAGCGTCCAAGCGAGGCGGGAGATCATAAAAAATAACGCTCGTTTG  
AGGAGCGCTTAGGTGTCTCTACTTTGTCTACGTCGTTAATGAGATATCC  
TGATGTGATTTTACGTTTCATCGCATTGATTTATGGGCTAATTCTAATGTC  
CCAGATGGGAAAAACATACTTCCAATCTCTTCATTGTGTTTATACTTAAT  
CAAACGAAAATTAATTAATAATCTAAATTTATACAAGTGGGATGATGAA  
GGACTGATGAAATATTCAAAGCCTTCGGAAATACGAATGTAGTTAAGGGG  
AACTAAGTGTTTATTGATTTAGTTTCTCTTCGATGTAAGAGACTTTGGGG  
ACAGTAGATGTATTTCCAAGAGCAACCATTGAAACAGGCTTGTTTTGTAA  
TCTATAATTTGCCACATAATAATATCGTCCTTAGTAATTTTATCCACTT



GTTCGAAAACCTTCTTCAGGTGATAATCTCTTACCTGTTGTCACCACTTGT  
CTACCAATATCTTCGACAATGGCTGTTGAACCGTCTAACGATAGAAGCAA  
AGCTGCCTTTAGTTGAGCCTTTGCTCTGTTCACTTCTGTGTCTGAGATTT  
TTCCTGACTTTATCCTTTTCCATTCTTTAAAATTTTCATCTACAATTAAC  
TTCACGTTATGATCAGTGACGATATACATCCCCACAGGCCTGAATCTGC  
GTATGATGTGGAAAACGACATATACGAATTGGCCAAAGGTCCATTTTGAC  
TGGCTGATACAGCCAATGGAGAGGGAGAATTTGTCCCTGTGCCAATGGCT  
CTGTCCCAATTACCAACAATAGCTTGCGTAGCCAAAGCAACAAAATAATC  
AGGAGCGGACCACGAAACACCTTCTAGTGCAATGGCGACATGTGTGGTGG  
GCAGCGTCTTTTCCTCAATAAGCTTCTCACCTCGGTAAAAGACTGGCAGT  
GGACCTCTTGGTGAACCTAACGGGACAGGTGATTCAGATTTGGGTACATG  
ACCAAAATATTTTTGGGCATGTTCCACCAATTTTTTCATGGTCAACGGCAC  
CTGCACCAGCCAGTACCATTCTGTCACCTTTATAGTTTTTTTGTATGTAA  
TTTTTTAGATCAGACCTTGTTATAGATTTGATATTCTTAATGGGTCCCAG  
AATGGTCCTTCCCAATGGTTGGTCTTTATAAGTGATCTCATGGAGATGAT  
CAAAAACAACCTTCGTTCGTACATCTTATCCACTTCCTCACTTTCTCTAATT  
ATAACGTCTCTTTCCCTTTCAATGGCATTACTATCCAAAACAGATTTTGT  
TAATATATCACTCAGGATCTCAACAGCCTTGGGGATATCCTCCTGTAAGG

ACTTGGCATAGTATACCGTGTTTTCTCTCGAGGTATACGCATTTAAGTGA  
GATCCTATATTTTCAATTTCCAATTCGATCCCTGTTGTGACCTATTTTGA  
GTTCCCTTGAACGCCAAATGCTCCAAAAAATGAGCCGTTCCGTTATTCTT  
GATATTTTCAGCCCTGGAGCCAGCATCGACGAATATCCCGACTGTAGCTG  
AAGA

>19.2-F1

TTTCAGACTCCAGATTATCCGCTGAAGGTTTGGCTAAAGTGCTAAACTTG  
GAGTCCCCCGAAGAAGCGTTGAAAAGAGAACGCTTCATACTGGGCATTTT  
CCAGAATGAACTCAATTACCCGCTAGGCTACAAGACATGGATTAGAGACA  
CTACAAAGGAATACAGGACAAAATTAATCAATCAACTGCATCAACGCGTA  
AAGGTCAAGTATCCGGAATACGACCAATCCATTTTGGAAACTATAATTAG  
GCGGGGTACCTACTACATGATGCAGAGTAGGTTAAGAAGGGAAAGAAGAA  
CGAAACTAAAAGAACGTAAAAGAACAACCTAATATATAAAGAAGTTTCTA  
ATTAATAATAATGCATTGTACACCCCATTCATATATACAAAACATACAT  
ACACTCACACACACGGGGAAAAAATGAATATGAACAATTTTTCACATCCG  
CTATCTTTCTCTTTTTTCAATCTGTCTTGTCCATTTATAGTCGGATGAAA  
ATAACTAAGAGTAAAAAAAACATCGGAATTTTATTATGGTACATATAGT  
TAAAAAATTTACAACCCAACCTCTTGCCAACTTCCTCTATTAACCTAGT

GAAAGATGTCTTCTTCTTGGATTTTTTCGTCAGCTTGGCTTCTTGTAGA  
TGTGATGTCTACCATCTCTCCAACCAGAAGTGCTTACATTCTTTTTGGAG  
GCTTCCTCTTCA

>19.3-R2

TGGTATAGGGACCACGTTATCTATTTTTTCAGCGAGTACTTCATCTGCAC  
TCACTGTATGCGTTCCAAATTCCTTTATTATATTACTGCATGCTTCATAT  
ACATTTCTATCCATTTTGAAGTGAATCTTTAGATGTAATGTCCGTGAGGT  
ATAGCTGCTTTCAGGTTTCTCTATTATTGATATAGTATGTGAACAACACT  
TCTCTTCACCGTTTAAGTGTTGATCTACATTTTCATGGCATTTCGCTTTTCT  
TTCAAGCGCATTTAACAAAGCAAATAAGATGAATTGGCTGAAGGAAAAT  
GGGCCAAAAAGCCAAACACTTTGGCCCCACTATGTATTTAATGTTCTGCC  
TGGGAGCACCTACTTTGAGGGGGCAAAAATTAGTTGATAACAATTCTTTT  
AATAACCGCGAATAGAAAAGTAATACAAACTGTTGGATCATCTTTTGACG  
TACATATACATATTTACATATAATTTAGAATATCTTTGAAATGATACTTG  
TGTAATAATTAGTAAAATTAGCGTCGTGGGAACGGGTAGTACATCGTTCAC  
TTTCTTTCGGTCATTACCTCCCTTCTGGTGGCGTCTTGCAGTAAATTCGT  
ATCCACCATGTTCTTATTGAGGTAGACATATCTAACTGTGGAACCTCTTA  
TGAAGATATTTCTTACGGAACCTAAATGCGGATATTTCTTCTCATCCGTG

CATGATATATTATCTAGTTT

>6.15-F1

CTCCATAGAGGAGAAGCAAACGAACACAAATATTCACGCAATAGCCGAAT

GCCGGTGAAAGCAAGACGTCCCTTTGAGATCTTGTCTTCCATTTTGCACT

TTCATTTGACGTTTCTTATGCTTTGGTCGCTACATTTTTTACTGACGCGC

C

>6.14-R2

TTTGTTTCCAGAGTCCCTTGCTTTATCATTTCATCTTGGTTTTGAATCAA

GATCTTGA CTCTCTCAATGGGTGAGGCAGCGGTCTTGGCAACTGCCGCAC

TGACACCACCCATTAAGAAATTAATAGCAAAGCTCGATTCTTGTTGCTTA

GTGTCACTACTCATTTTTTTTTCTCAAGATCCTTTTATATCGTTAATATAT

CTGTGGTCAATTGAATAAGTCAAACCACTCTAGTAAATCAGTTTTTTAT

ACAGAGAAATACAAGTGTACCTTGAGGAACGTTTTGATAAAGAACAATG

GAAAACCCATCACGAGAAATTTTCATGATATATTTAAAGGCAAGCAAACAA

TGAAAAAAAAAACTTTATTTCAAATTGGTCTAAGTTCTAAGGGTAATAC

TCAATGCAAGACTTTTCAGGATTTACACCCACACATTTTTGCATCCATAC

ATTATTTGTTTTCTTCAAGGGTCATTTTCTTTTTCTTTTTGCGTGACGT

CCTCTTTCACCGTCCGCAAATACTTGTAGAGTGTTTTCCCGCTAGGAATGC

AGGCCCAAACGGACGCATTTCCCTCTCCAGGCTCGC

>1.2-F2

GAAATATATGAAATTGCATGTATCCAGAGTGCATGGCAAAGCGCAGGGGG

AAAAAAGGCCGGGCTGAGGACAGGTCGTTTTCCACGCTTCTCGTCCTTCT

CACCGACCGCGACGCCACCCGATCAAAAATAATAAAAAAAAAA

>1.2-R1

TACCCGAGTGGAAGCAGCAGCACGTGTCGACCGCGCCGTCCAAGGCGACC

ACCGTCGAGGCCGCGTGCCGGTACATCCGCCACCTGCAGCGGCACGGCAG

CACGTGACCGCGCACCAATGGGACGCGTGCGCCCGGGCGTATCGGGCCGC

GCGGCCCGCCCTTGTGGTGTGCCAGTTATAAGAGCGCGCTTGCTGGAAC

GCCCACCCGTTTTCGAGACTTGGGTTTCACACTCTCTACAGGCAGCATAAC

GTTGGCGCTTATTGCAAACACACACCAAAAGAAAAAAGTAAAAGAAAAA

ATAGGAAATGGGCGTGTTGGAACCTTGCTGGTGAATACTGGGAACAGT

>31.10-F3

TCGTAATATTGAAATAACGTCAGAAGCTCAAATCCCAGTTCTTTTTTAT

CATAGGGTAGTTCACAGGAACATATGATATGATAGGTCCAAGCGCGCCTA

TCACATATTCAAATAATTTATAAAAGGAGGCCCAATGTTTGGATACGATG

TCATATGAATATTCACATTTGGACAAAAAGCTAAGAACGTGTGCTTCAAT

TATTGACTTGGCCATTTATCACAAAATTCTTGAAAACCTCAACACGATTT  
GATGTCGGTGCAGTAGCTGGAATCTCTTTTGCTTTTCTTCATTCTCGCTA  
ATTTCTAAATCTAAGGGGATATAAGACTTCCTTTGTGTTAATTCGCGACA  
GTTATTCAGCATTCTGGGCATTAGCTCTCTAAATTTAGTAACCTTAATAT  
TATCATATTTTAACCCGTCAATATCAGTTACGTTTATAGTTTCCGCCAAA  
GTAAGGCGAAAGAAGTCATGCAATTCAGTGATCATCGCTTGGTACTTGGG  
GTTTCTCTCATCGTTAAATCGATGATACAGCTCTAAATTGTCACCTGAAT  
TTGCTTCTCCACTTAGAGATCCATGATATTCCTCATTTTTGAAAGGGCCA  
TTATCCGTCATTGTACCAACAAATTCCATGTGAAGGCTTTTGGAACAGCA  
AGAATAGGATCACTAAGACTTATTGGTTCGAAAGCGCTTGGAACCTAATC  
TCTAATTCATATTTTTCGCATTCCGCCATTATTCACAG

>31.9-R4

TATAGACTTGGACCTTTCAAGAATAATGCTCGACGATATATTCCAGGAAC  
CCAGAGTTCATGCTCAAATGAGACAGCTTCTGTACAACCTATCTTCTCATC  
CATAAAAACGAACAATTGCAGTACAAGCAAGGGTTCACGAAATATTAAG  
CGTTATTTATCTGCAGCTATACCATGGCAGCGACGTCGATAATATCAATC  
TTCAGAATGTGCTGATCATCTTCAATAAGCTAATGAACCAGATCGAACCG  
ATTTTTTATAACGAGGAAAACCTGATCAACTG

>19.7-F3

CCGGAGATACGCTTGACACCACCTCTTCTAGCCAATCTTCTGATAGCTGG  
CTTAGTGATACCTTGAATGTTATCTCTTAGAATCTTTCTGTGACGCTTAG  
CACCACTTTACCTAGACCTTTACCACCTTTACCTCTACCGGACATTATT  
GTATTATATTTGTTGTTGTTGTTTTGTTGTTGTTTTAGTATCTATATA  
ACAATATAAAATAAGAGAACGAGAAAAACAAATCTGCAGGGGGAGAAAAG  
ACGCCTGTATTTATAAGAAAAGGACAGGTCCATTGCAACAAACAGTTTAA  
CCACCATATAGGCGCACTACGCTGTGAACGGAGAACGGGGGTGGCAATTC  
ACCACCGTATTCGCGGGCGTGTGTGAAAGTAAACAACTTCGTTTTCTCCC  
GCCGACTATTATGGGGCGAAGCGACTGGAACAGTTTTACTATGCGAAGGT  
GCGAATTTCTCAGAACGCGGTTACTGAATTCGGGCGGCGCGATACAAAAT  
CATTTTTG

>19.8-R3

TTCCAACGTTATCATCAATGGTATCTCTAAAGGTGGTTGTGACGATATGG  
TCGCATTACATAAAGACGATAAGCTGTTAGAATCTTTTAAAGAGTGGAGT  
GATGGCGCCTTTACCGTAGAAGCTGTTCCACCATCTGAGAGTATTTAGAT  
TTAAAAAACC GCCCTTCCGTCTTTCAATTCATCGAAAAGGAGCTTGTTC  
ATATTATTGAGATATAGGAAGAATTACTTATATAAACAGGATTACAC

ATAGCATTAAATATGAGAGCCATTTGTTTGGAAAGAAATCATACAGCTTT  
TAAGGCTGCTCCGTACCTATCCAAAAATAAATCTTAGATATCGTGAACG  
AATAAAATTTGGCTCCAACCTTATAGTAATTGGACTATAAGGTCTACGATA  
GCTCGTACACTTGTTACACTTTTTCTTTCAAATGTGTAAAAAGATTAAAT  
TGCTTCCAGTCGGATTTGAACCGACGATCTCCACATTACTAGTGTGGCGC  
CTTACCAACTTTGGCCATAGAAGCCGAAATTTATGATGATCCTGGGCAAAA  
ATGAGCGATATTACCACTCTGTATGGGCTCCGGTGCAGATCACTTTCAAG  
CTCTACGACCATCTGCTTCACATCACTGAGAGTAATAAGTTGAAAGTGAG  
AGAACGTC

>175.3-F2

TTACTTCTCTAGATGTTGTTTACGCTTTGAAGAGACAAGGTAGAACCTTA  
TACGGTTTCGGTGGTTAAACAATCGGTGTTTCGCAACTTCTTTCCATACC  
TTTTACAACAACAAAAATAAATAACGATCATTCTATTGGGGGAATATA  
ATAGAACCTTATGTATGCATTTTTCTTCGGTTTTTATTATTTTCATGTACT  
ATATATATATATCAAAAATAAGTCTCGATAAAAAAACTAGTTTCCAAAC  
TCTTTCAAGTAGTCTTTCCTAACGTTTCGCTTCGATCTGGTTACCGTTAA  
CGTCTCGGCGCGGTGTTTCGCGGCCCTTCTCTTGCTTTATCAAGTCGACCC  
AAACATTGAGACAGAACCCAGTGGAGTCCTCAATATCGAGTTTGTTTCATG



GGGCACTTACATCTGCAACCGCATCCAAAATCCTTACCCATGTCGTATGC  
TGC GTTCTTCTTGCGCTGGAACCTCGGATCGCTCGTCACGTAGGGAAACT  
CCTCGCCCCCATCGCATTATGCGGGCAATGCTGTATGGAAGAATGTCTG  
TATCCGATGTCCCTGAAGTAATGCACGTCGTCCAAGTCTAAGGTTAGCGA  
TAGTCCTATGGAATGCACGGGGGCGTCCCCCATCTCTCCTTCCAAAATC  
CGCCACTTTTTTCTAAAAATTCGAAAAAACTGTTGTAAACCTCATTGTCA  
AATACGCTTAGCCGCGCAATTTCAAAAATACTCCA

>175.3-R1

CTTGTTATATCCTGCGATGGATTAGAGAAATCCATCTTCATATCCACGTC  
CAAATCAAAGTCTGATAATTGAAACGCATTCAATCTCGCCTCGCTACTGT  
CCCTGATATTAGTGCCCTGTTGGCACCGTTAGCACCACTGTTGTCCCTG  
CCGTTACTACTATTTATAGTCTTGTCCTTTTCTTGTTGCCGGTCATGTA  
GGATGCCATATTACTGTTACTGAAAGACATTATCTCACTGTGTTCCCTTCT  
TCACTAAATTCCGAAGCCAGACTGAATGTTGCAATCTAATGCCGCTCGCT  
TCTAGGTGTATGGTCCTTGTTAAAATTCGGTTAGAGCCCTTGACTAAGT  
CTTCCGAATCTAATTTATCTCGCTCTTCGCAAGGTTGTAAAGTCAATATC  
GGACTAACATGATAAAAAAAAAAACCAGGTGGGAAAAGCAAGAAAGGCA  
AGCAAGAAGAAAAAAGAAAAGCAGAAATACGACTCCGCTATATAACCCT

CTCATGTAAGGGACGATTACAGGGGTAGGACCCTCGACGAGGTATACAAC  
CCTTCATCTACAGATAGTCACAGCGCATTGCCAATCAAGGCCCTCTAGAA  
ATTGCTAAGTGCGCGGAAAATGGTTTTTCAG

>7.3-F1

CCCAGCGCCAATTGTACCACCAACAATGGAATGTGTAGTAGAAACTGGCA  
TTCCGATTGCAGTAGCAAATGTTAACCAACAAGACGAGCCAATCAAAGCA  
CTGGTCATAGTAAGCATTAAACAGCGGGGTCGTTGGTAAAAATGGAGGA  
ATCTATAATGTTGTTCTTGATAGTACCAGAACTCTTGCGCCTGCCAAGA  
CAGCACCCAAGAACTCACAGAGAACCCGCCAAAACCATGGCTTGCCAGTA  
TTTTAGAGATCTAGAAGAGATCGACGACGCGAATGAGTTCGCCACGTCGT  
TTGCCCGATGTTAAAGGCATCCAAAAATGCAAATAACATGGCAATGGCA  
AAAATATAGTCAAATTGATGTAAAGCCATTTTTGCTTAATCTTTGTTTAT  
ATTGATTCGATTAGATACGCTCCAGTATTCTCACCTTTGATCTATGTCAC  
TCATTCTATGACAATTCATGTAAAATAACCTCAATGTAAAGATCATCTTC  
AGCAGGTTTATATATAATTTTCTTCATATCGAAAACCGGGCTTAGTGACA  
TGAATTGTTTGGAGATGTCCACCCAGTAGACATTGTAAAAAAAATCTGCT  
ATTGACTGAGTTAATCTAATGATTTACATAATAGAAGGGTCCAAAGTGCC  
TGTGACATCTAGTATTGATAGATTAGTATTACTATTTGTCTCCCACG

TGCTGCATTGTCATATGCAATTTATTAAGATTACATAAACTCCTTTGTAC

GGTATATTCTTAAAGCCTTTCAATGACTCGGGCCAATTTTTAGCAATATT

TCGACATTTAA

>208.1-R1

ATTGGGGTGCTAAATCAGGCTTTTTCTGGGGAGGATTTTGTCTGGCCACT

TTAGCTTGGGCTGTTGTCGATTTACCAGAAACCGCTGGCAGGACTTTTAT

TGAGATAAATGAATTGTTTAGACTTGGTGTTCCAGCAAGAAAGTTCAAGT

CGACTAAAGTCGACCCTTTTGCAGCTGCCAAAGCAGTAGCTGTAGAAATT

AATGTAAAGATCCGAAGGAAGATTTGGAACTTCTGTGGTAGATGAAGG

GCGAAGCACCCCATCTGTTGTGAACAAATGATTTTTTTAGCCAGTAGGTA

GATACGGCGTTATTTAATTTTATTTTATATAACTAGTACTTAACACATCG

AGTTTATTTTACTCGACATTATGACTTTTTTTTTGGTTTTGTTGCGGCTT

TGAAGTTTTTTCAACTAGAGGTTATTATTTTGTCTGAAAAACGTTAAT

GATTTAAATGAATCATTGTGATGAGGGTCCTAGATTTAAATATCTTGCAA

AAAGAAGTACTAATATACAATTTTTTCATTCCCGTTAATGAAAATGCTTG

AATTTTTATATTGTATATTGATACACTCTATTCATGTTCCGGCAACAATT

ATTTTTTTAATTCTGTAAATTTACTTTTTGACGTATTCTTTCAGCATTT

ATATGCTTATGTTAGAATTCAAGAGAGTATTCCCTATTCCTGGTAACGTA

AATTCGCTTTGTAAATCAACGATACATGATTCTCATATCCCAACAA

>241.1-R2

GAGTCCGATTGTAGTTGATGAACAGTAAAATCACTTATTATTTAAGGATT

CCGCTGCGGTATGCGTTTTCTACTGATGCGTGGAGCAAGCCACGCCATGT

GATTAACCTTGCTTGATAAAAAACCAACCCATCGTTCAGAATATGCATG

GAATATAGCATTACTAGAAGGAGAAAGACAATAAGTTTTGCGCATATGGT

AGGATGGTGGCACATCGAGTTCTCTCAACCAGTGAGAAATAGGGAAAAAG

AAAATGGTTGTAATGGTAAAAAGTAGTCTCGTTTTGGTAATTCGCAGCTG

ACAAACTACAAAATATATAAATTGAAAAAGTTGTATTTATCTTTACGCTA

AGGACTCCTCACTGCAGGATAATTGCGCTTCTTTAATGTATGGCCATAGT

TCCACATTCAATGATAGAGCCCGCATAGATTTCTTCGCAGATAGAACGCG

GTAGAAGAAGTGGCTAAAAAACCATTACAGTCAATCCCGTCAAAGAAAA

ACTCTTCATTCTTCCAGACTTTTTTCTCAAACAAGTACCTATTCATTTTT

TTTGCAATTTGTCATCCATTCGCACCACTTTCTTGCTCATTTATAAT

AGTCGACAAGAAGTGCATCTTGTGTTCCATTTTCACAGATAAAACGATCA

TCCTCATGTTTTGGAAACCTTGTACCAACATGAAAAGAATCCACCCGAGA

TAAA

>101.1-F2

TGAGTGTCTTATCGACGTAGTTAAATACCACACTTACGAAAATGGCAACT  
CCTGTACGATGTGTGCTAGATGTCAGATTTTTGAAGATATCACTGCAAAT  
GACCATGAAGGTTATTGCCGGCGCAACAGCTTTCAGATCAAACAAAATCA  
GCATGGCCATTGACATTGCTCAACCTTTTTCTTGTTACACATCCAGAAC  
TGTTGCAGTAGGGGTGCTTTGTCTTTTTAGAACCCCTCCCGCTACAA  
AAACGCACCTTTGGGAAAGGAATCTTTTTGTTAGAGATACAACCTAAAAT  
TTCCCAAATTGTGAAATATCGATTGTTCATTTTAGAGTTCTGTTTGCCG  
AAGCAAGTCCCAGGAATTTCAACATTGTTGTTGCCTTAAAGGTGCTAT  
TTTCACAGCTACGAGATGCAATGTGCTCAACATACGGATGCTACAGTTAT  
ATACCATCTCAGCTTACCCTGCCATTCTCACTAAATCAGTAAATATGC  
ACCCACATCATTATGCACGGCACTTGCCTCAGCGGTTTATACCCTGTGCC  
ATTTACCATAACGCCCATGATTATCTACATTTTAATATCTATATCTCAT  
TCGGTGCCCCCAAATATTGTATAACTGCTCTTAATATATGCGTTATACCA  
CTTT

>232.1-157.1

TTTATTTTTGCCTTTCTCATTATCCCTCTTCTCTCATTTTCTAGAAAT  
ACCTAAAAGGGAACCGTTACCCGAACCTATTCATTATAGAAATAAAGA  
GAACGTTCTCTATAATATTCGTATACATTCGTATATATTCTATTCCATTT

CTTACGGTATTCACACGAAGTAGGACAACAAGCTGGATGGTAGTTTGCCA  
GAATCGACAATAGTCTTTGCAGATTCCTTCAAACCTTCCTTGGCACCAGC  
AGCATTGGCCTTGATCTTATCGGCGGTGGACACTAACTCTTCGTCATTCA  
AACTGTCAACGATCAAACCAACTTGTTTCGTCAATCGTGGCGGCCTTGTC  
GCATCACCAAAGTAGTCAGCTTCCTTAGCAGAGTTACGGATGGCTCYCTT  
GTTCTTTTTCTTGGCGGCCTTAGCAGCTTCCTTAGCCTTCTTTTTGTCAG  
CTTTTGC GGAGGCGTTAGCCTTGGCTTCAGATTCAGCTTTAGCCTTGGCT  
TCAGCTTCGGCCTTGGCCTTAGCTTCAGCTTCAGCTCTGGCACCGGCTTC  
TCTTTCCATTTTCTTCTTTCTTTCTTTCTTCTTCTTCTTTGAACA  
TTTTAATACGGGGATCTTCACTGACAGCTCTTTCAACAAGTTTGACCAAT  
CTAGCGTTATCAGCAGTCTTCTTCTTGTCTCTTGC GGCCCTTGTTCTTTCT  
TTCAATGTAACGCTTGTGGTCTCTGTTAGAAGAGTCATCTGGGACATCTT  
CGTCCAAGAACTCAAAGTTCTCCAGGAGTCAAATCTGTGCCAGAAAGCA  
TAGAATTGTTCAACTCCTTCTTGAAGAATCTTTGTTACCTAGAGAAGG  
AATAGGAGTCTTCTTAGAAAAACGAGCTTCAGCTTCGAAAACGGGACCCC  
AAGCTTCGTAAAAGTCATAATCGGTACCCTTCTTTGGAGGAGGAACATCG  
GCAACAAAATCACATGAGTCGTA CTGAGCTCTCTTGTGGAATCAGTCAA  
AGTTTCAAAGGCCTTTTGAATAATCTTGAAAAAGCCATCTTGGTCCAAAC

TACCACCAGCAGCAGATTGCTTGTCTGGATGGTACTTGACAACCTTGTTTT  
CTGTGAGCCTTGATGATTTGACTTTTCAGTAGCTCTGAAACGCAACTTAGA  
CAAACCCATAGCAGCATACAAATCGGCGGTTTTCCAGTCTCTAGCATCAT  
GAGTCAGTAAATCTTCATCGGCCAATTCAGTGTCGAATAACAACCTCGTCT  
GGGTCGACATTGGATTCATCAACGGTTTTGACGTTCTTTTCAGCTTCAAT  
TCTTTCAAATTCAGACCAGGTGTGGTTTTCTCAAAGTTCTTTGAGCATGTT  
GCAAAAAGAACTTACCAACCGTTCTACCGGACGACGGACGAATGGGGTT  
TTGGTAGCGGAACTGTTGACTTCAACAGTGATGTCTGAGGTTAGGGTAGG  
TAAAGAAAACATCGTACTCTTGTTGGTATCTGTGAGACAAAACGAAGAT  
TCTATAAAAGCATCGGTAGGAAAACCTTATGAAATTTTCTCTACCAGCTC  
TTGAAATNNNNNNNNNNNNNNNNNNNNNNNNNNNNNNNNNNNNNNNNNNNN  
NNNNNNNNNNNNNNNNNNNNNNNNNNNNNNNNNNNNNNNNNNNNNNNNNN  
NNNNNNNNNNNNNNNNNNNNNNNNNNNNNNNNNNNNNNNNNNNNNNNNNN  
NNNNNNNNNNNNNNNNNNNNNNNNNNNNNNNNNNNNNNNNNNNNNNNNNN  
NNNNNNNNNNNNNNNNNNNNNNNNNNNNNNNNNNNNNNNNNNNNNNNNNN  
TTAATTTTATAAAAATTCCATCGTTTATATTCGATTATTTTATATGTCA  
ACTTTTTTTTAAGAAATGTTTCATATTTAGTCAAGTTCTTAATGAAAAAA  
CGGTTGAAAGTACAAGGCAACTATCATTTTAAGATGTAAAAAAATTGCC  
AAAAAAAGGGCATTGATGAAATGTCTCATCGCCCTACGACTTCTGCTG

TAATCAGAACTAAATGCGTGATCGGAAGTACTATTAGATATTGGATGCAT  
AAAAGATAAAATGCCAGCTAACGATGGCAGAATAAATAGGTAAATATATA  
TATATATAGGTTTTCTTAATAAATAAGGGAGAAATGTACAGTTAGAATCG  
TAGAATTATCCACATATCCCTATCTTCAAGATCTGTCGTACTIONTAAATGCC  
TCCATAGGCTGCAATCCCCATTTAGCCAACATTGCCTTGTCTTCGTCCCA  
ACCGTTACACATTGTCGTCAGCATTTTTCTTACCGGTGAAGATACTGTTAC  
AACCTGCCATGAAACAGACAAATTGCTCTGTTTCTTTCATTGTATAACGA  
CCAGCGGCAAGTCTTATAATGGCCTTTGGCATAACTATTCTCGCTGTGGC  
AATGGTTCTCAAATTTTCGTGCAATTGCAACTTTTTACTCTTTGGATCGG  
CAAGTTCCTCAGCCATTGGAGTCCCTTTGATAGCAACTAGTCTATTAATT  
GGTAGGGACTCAGGATGAGGAGACATATTGGATAATGTGTAGATGAATCC  
TATATGGTCGTCTTCGCTTTCACCGAGACCCAAAATACCACCGGTACAGG  
CTTTTATTCCAGATTCTTGGACATTCTTGATGGTCTGTAACCTGTCGTCG  
TAGGTTCTCGTGGTGTATGACCTTACTATAGTGTCTCTGGAAGTGTGAT  
GTTATGGTTGTATGCAGTCAAACCTGCATCTTTCATTGCTTTGCTTGAT  
CTTGATCAACCATACCTAAAGTAACACACGTTTCTAGCCCCATATCATT  
ACTTTGGTCACCATTTCTGAATTCTTTTCATGGCTGATTTACGACCTTT  
CATGTCTCTCCATGCAGCACCTAGGCAGAATCTAGTAGATCCGTTTTCTTT



TGGCCTCTTYTGCCTCTTTAATCACTTCATCCACTTTAACCATTTTCTCA  
GCCTTTAGACCGGTATCGTTTCTCGAAGACTGCGCACAATACTTACAGTC  
CTCAGAACAACCACCAGATTTGATGTTTCATCAATGTGCACAATTGCACTT  
TGGTTGGATCGTGCCACTTTCTGTGCTGCAATTGTGCTGCATGAGTAAGT  
TCGAGCAGTGGGGTATGATAAATTTCTTTTAATTGCGATTTTGTCCACGA  
ATGACTTGGTTCATCTAAAGACAATGCATATTGTAGAGCACCCAGAGTAC  
TAGCTTCTGAGGATGCAGTTGTCGATTTAACTGCGGCATTGGTTGCGTAT  
TYAGTTAAAGCCGGTCTAGCGGTAGATAAATGACGGTAGATAGTAGACAT  
CATACTGCACTAAATTGAAAATAATCGGCTAGGTTAGCTCTTCTGAGGAC  
ACCACTGCCAGAAGAGTAAGATCTGAAAAATTTTCAGCAAGTATGGGAGC  
AAAAAAAGCTTTGCCCTTTTATATAAGATCTGCCTAAGAGAAGAAATAAA  
AGATACCAAGAGAATCTAGCAGAGTGGCCAACGAACTACATAGCCTGTAA  
ATACAGATTAGGCAGCAGCGTAGCGGATTTTCCTCAGGCATCGTCTCCCA  
CGTGAAATCTGTGGGGGCACCAGCGTGACAGGGACGGTTCTAATGCTTTG  
CGCTTTTCAACAACCTTTTTCCATAACCAAATGCCGGCAAATGGCTTCG  
AAGAAGACGCGAGACTTCATCCGCGAGTCATCTCGACATGACTATCTTTT  
GCTAGCCAACACGCCCTCCGCAACTTCCAACGATAAAATTGTAAAGAAC  
AGTACTGATGGACAGAGATTTGCGCAGTGGCATTTTTTGAAAATAAAATG

AAAAATTATATATATATTCCATACATAGTATATAATATGAACTCATTGA  
CTTGGAAAATTTTAGATGCAACAGGCAATATCGTTGGGCTTTTTTATTTG  
ATCATTAGCTTATTTGAATATGAAGGTAATGACCAAGGGCTACTAATGTC  
TCTCTATTAAGCCGTTTTCCAATTGTATATTTTGTAATTTGCATCGCAGT  
CATAACTTCTTGCAAGAAATAGTAGTTTCACACAATGAGGTAGTTTCGTT  
GGAGATGCAGTAATAATGCAGAATACGGATCTTACGGACCCCAAGAGAAA  
GCTACGCAATCTTACGGCTTGTAGGTTCTCAGTTCTCAATCGATGCAAAA  
TGGGTAAGTATTTCAAGTCTGAAATAAGGTCGCTTAGAAACGGTTATCC  
ATTTACTATTATCTGGAGGCTGCTTCCACAGCTGCCTACTTTGGAGTAA  
TGGTTTCAGGGAAGACTTCATCCTAGCGTCTCTTGCTGTCGTTATTCGAA  
GTTTACAGATTCTTAAATGGTAGTACGTTCTGCTTTCGCAATGAATAACTAG  
GTCACATAAGCCCTAAATACGCCAGTAGAAGATTAATGCATTGACCACA  
TCATATCCTTCTAAAGTAATTAATTGAGATTTAATATTTTTTCGTAAGA  
TGAGAAAGTTAAACTAGTGCAACTATTATAGTCACATTTGTACGGAAAAG  
GCAGAAGCAAGAACAATGACTTGAAAGGGCGTATAGCTACTTAACCATTT  
CCATTTGTATGCTATAATTCAAGTATTTCCACACTCTTAACTAAAACGAA  
TCAGAAGAGTAGGGTACTAAGAAAGATGGCTATCCTTAATAAGTACTATC  
CGACGTTGAATTGAAGATTGAACTGAGTCACACATTCCCATCTTCTGCAC

ACTTAGTTCCTTATTTAGAGACTTTTATGATAAAAATTTCTTCCGTTAC  
TGTTAAACAACCTTGGGAACAATGCTGACTGTGCAGGAAAATGACCTATG  
TTTGAAGGATGTTGCCACATAATTGAGGCATGTTAGCAGAGCATTCCCTA  
CCACTGGAAGGAGTGATGGTTGATGTATTTCCATTGAGACTGTGACATT  
GTGATACGATACCTAATCTACGACCCTATATAACTCATTAAAAATGGCTT  
TCTAGAACTACATCTATTTGATTA AATTGGTTCCCATTTTCACAAATAT  
TTTGCCACCTCTCCTTCTCGCCAAGGATTTGTACAAAATTAACAGACCTT  
TTAGGATAAATATTA AATTTAGGTCAGCAGAATACGGCCACCATCTCATT  
CTTTACTAGATCAAGCGTCAATTCCAATAATTATAAAAATATAAGTCAAG  
AAAGCATCTTTCTTCGAGTCTCCTGCATTGATTTGCGTTCCTCTCTCGT  
TCTGCTTGACAAAAGAAAGATTTTTTATTCTCCTAACCAATAAATTGAAG  
CAATCAGCTATAGGGTTAGATGTATTCGTTTTCTTTCTGACCCCTTAT  
GTCCCCATTTGGAAGTTCTAAACAAATGCCCTTTGGTGCCCAGTATATGT  
CAATGACGTCTGCTTGGCGAATCTCTGAATCATAAGTGTTACATAAAAAT  
TAAGTATCTACGGCGCAGTACAACGCCTTCGTCTGGTTAAAATCGACTCT  
TCTGTCATTAACATAAGAACGTATAACATAAAAAAATATATCAATGTAT  
ACATAAAGCTACCCAAAACAACTAAAACATAACTTTTGTAGGGTTTCTT  
CGCACATTATCATTATTATTCTTTGAGAATACTCATTGCTGATATATAT

TCTTCCTTCCCATGGCTTCAATGTTCTGGAAGAGGCATCTACCTCCTTCT  
TTGGATAGTTTCCAACTCTAACTTGAACGATGAATCATCATTTGGAATC  
TTGAAATCTGTGCGATCAGAGCTAAAGTTCAAAGCCGCAAACAATGTTTT  
ATTGTTGTA CT TCTTTGTGAAGCTAAACA ACTTCTTATTGTCTAAATCAA  
TAAACTCGAAATCGTATCCGTACACAGTAATGTCTTTATGCGCCTTTCTA  
AACTCAAGGCCTCCTTTCCAGAAGTTCAA AACCGAGTTGGGATCCTTTG  
ATTCATCTTCGACGTTAATGCCTTCTCTGAAAGAGTCGTTCAAGTAAAA  
CCATGGTTTAGCACTAGGACCAGAAAAACCAGCATTGGCTCCTCACGAG  
ACCATTGCATAGGTGTTCTAGCATGGTCCCTGGAGATAAGGGCAATGGCT  
TCTAAAACTTTTTCATCTCCTCTGAGTTTTCCCATGCTCTTCTTTAAT  
TGCATTGTAGTTGTTTCTGATTTGACATCCTCGTACTTTTCAACAGGCC  
AGTTCTTGAAATTGATTTGGCCAAGCTCTTGTCCTGATACACATATAGA  
GTACCGGTCAAGGCACTTAGCAACACAGAGAGTAACTTACCAGAAATAAC  
ACGTTCTTAGGAGAATCGTCACCAAATCTCGTAATTGAACGAGGTTGGT  
CGTGATTTTCCAGATAGATTGTTGACCAACAATCTGTACCATTAATGAAC  
CTGAACAGCTCAGCAAGGGCAATCTTCCAATCCTTCAGTTCAAATGGGAC  
CAAGTTGTAACGGAACAAAGGTGAAGTCCCCACATCAGTGTGGGAAAAGT  
TAAATAACTCACTAAGTTCGTGTCTTGAAGCACTCGTATAAAGTCTCTTA

GTTTCGTCGGAAGCATGTTGCATTTACCAACTGTCATAATCTCCCTGCC  
ATCCTTCACTCTGTTTCTGATGAATTGATTCATTTCTTGATGGAACTCGT  
GAATACGTGGTCCATTCAATGTGTATGGATCACTGGATTGCCAAGTCGAG  
TTTTTGTCAACAACAGGGGCATCTGGTAAACCTACAACCTTTGGAGTACAA  
ACTTCCGACATCAATTCTAAAGCCGTCTACACCATGGTCTAACCAGTATC  
CAACGGCACTTTTCGTAGATTGCCTTTCTACAGTCTTCATTCTCCCAATTC  
AAATCAGGTTGAGTGGAGCAAAACAAACGCAAGTAGAATTCTTGTGTCTT  
TTCATCGAAGGTCCATGCGGAACCACCGAAATAAGACTTCCAATTATTTG  
GAGGAATTGGCTTGCCTTCGGCGTCATAACCCTTAGGAGGTCTCCAGAAG  
AACCAGTCACGCTTTGGATTGGTCTTCGAGGATCTGCTCTCTTTGAACCA  
TTCATGTTGCTGGAACAGTGATTGATGACCAAGTCGGTGATGAATTTCA  
TACCAAGCTTATGTGTCTTTTCGATCAAGGCAAAGCAGTCTTCATTGTA  
CCATATGTTGGCCAGACCTTTTCGTAGTTGGCAATATCGTAACCCATATC  
ATCTTGTGGCGAGTCGTAGAATGGTGAGATCCAAATGGCATCGACACCAA  
GCTCCTTGATTTTTTTTTTTTTTTTTTTGGTTTACTTAGGCTCTATAATAGC  
TTCGACTATTGCTGAAGGGAAACAAAACATAAACGACTTTGGATTTAATA  
TTCCCTTTAAATACCTTTTAATTTTGCAAACCTGGTCTTGTTGATTGCGC  
AAGTGGTGTGTTGTATGATAGGAGTTAAGTGTGCAACATTTTTTATTCTT

ATTACCTTAACGGAATAATAGAAGACTTTGGCAGATTATCCCCAGTGACA  
ATAATGTCGATACTGGTTCATGAAGGAGCTTAATTCTGTGGGGTAAAAAA  
ATCTTAGCAATTAACCTTGTTCTTCAAGTCTTGCTGAATTGGGACTACGT  
ACTCCATTGTGTAAAAATTGTGGGGTTTGCCTTCTATTTCTCCGAAAAAT  
TCCCCTGCGGCGACCCTATCTTTACGTAAGGTACCATAACTTGATCTGAA  
TATTTTCCTCTCCGAGATTTTCTCCGACAATTGTCCTCCGCGCAGCCAA  
CGTTATTTCTCAGGTCCATCGATTTTTTGTTTTACCATATTCCTTAAAG  
ACATACACAAGGTTAGTAGGAGAGGAAATCCATGGGGAGTAGTGACAGAA  
AAAGCTTAGAAAACCGTCCCTGGCGTTTATTGCATAGAGACACATCTCTT  
TCGTACAACGGAGCAAATATCACAGAAGCGGTACTCATCTATGTTAGTA  
TCCTTGCGATTCTCTCACCTATCACAGAATGTTATTCTAACACTACTAG  
AGATAGAAATTTAAGCAGAACCGCCTTATTTTCAGAACGAATTTTTCGCC  
AGCTTAGTTTGCTCGAGGAAGGGGGTGGGCGTGAATTTTTTTTTCTTG  
TGTCATCCACTACTCTCCCTCCTGAGTATGGGAGGAGAAGATTATTCGAG  
TAGAACGGAGATTTTTTTTTTTGGCTTAATACGTGCCTATTCATTGTCTGA  
TATTTCAATGAGAAGAAGTACTGTTCGGGGGAATATTTAGAAGGAATT  
GGTTTCGATGGACATTAGTGGCTTCTTTGTTACCTCATATTTTTCGTTCT  
CATTGCAGCGCCCTTCTCACCCGCGGGCGCTTTTATCCCGCCCCGGCTT

TTATTGTCGGTTCCATTGTATTCAATAACTTAAATGCAACAGAAAATGAT  
TACAGGATTCTTCTCTCATAGAAATATAAGCAAACCTTCAAATGGAAGTGA  
GAAAAAAAATTTCTTTCTATTGGAATTTACTTTACAAATGACTTTGGC  
AAAACAGGCACGCAATTGTTGTCGTGTTTCGTCGAGTAAAGTGTGACGGCG  
AAAAGCCATGTAATCGTTGTCTGCAGCATGATTTGAAATGTACTTATTTA  
CAACCTTTGAGAAAAAGAGGGCCCAAAAATATTAGATCGAGAAGTTTAAA  
GAAAATTGCCGAAACGCAAACGTTTCAGTGAGAACAACAACACTGTATGACAG  
CTTTAGAAATATCTATAGGAATCATTATATCTTACATGTTATTCTGTTCT  
GTTGTAGTAACTAATTTTCAGAGATCTTTTCGGATGCTACTACCCCTGTTT  
ATAACGTGTAACCTTAATCTTGAAATTTGTTTTTTCCCAACAATTTTTTC  
CGTAGCCTTTCTCGCGAGAATTAATCCGCCGTACAATAATTCGATCTTAC  
TTGTATTTTCTCCCATGAGCATGCAGACTAATAGGTAGGAAAGTAGAACT  
ACTTAGAAACATTCTCCTTAAGTGTTCACCACTAAGCATTATTTATATTT  
AATTGTAAAAAATATATACTATTGAAGAACCACTTTCCTGAAATATCAA  
GAACAAAAAAGTCTGCACTATGGTCCCGCAATTGATGCATTTGAGAATTC  
TTTTAACTCAATAGTAATATGCATTGTTCTTATCTAAAAAATTGCAGGTA  
CCTGCAGACTAATCCGGGTCATGATCTGCGCTGCGCCCGTCATCCCACCC  
CGTGCTGCCTGCCACTTGAAGCTACCCCGGGTTTAATAATTCGTTCTTTA

AGTTCTACAACCTTAAATACAGGCAGCTAAAAAACTGGGTTTCGAGAGTTTT  
CCACTTTATAGACAAAAATAAAAACTGCCAGAAAATTTATCATATAAT  
AATATGGGTATTGCGAAACAGTCTTGCGACTGCTGTGCGGTTTCGTCGAGT  
AAAGTGTGACAGGAATAAACCATGTAATCGCTGCACTCAGCGCAATTTGA  
ACTGCACTTATCTTCAACCGTTGAAAAAGAGAGGTCCAAAATCCATTAGA  
GCAGGAAGCTTAAAAAAAATAGCGGAAGTGCAGATGGTGAGTATGAATAA  
TAATATTATGACCGCTCCGGTGGTATGTAAGAAGGTTCCGAAAAACCTGA  
TTGATCAATGTTTGAGGTTGTATCATGATAACTTATATGTAATTTGGCCA  
ATGCTTTCCTACGATGATCTTCACAAGCTTTTGGAGGAAAATTATGAGGA  
CTGCAGCACTTATTGGTTTCTGGTATCCCTTTCGGCAGCTACTCTTAGCG  
ACTTGCAAATTGAAATAGAGTATGAGGAAGGAGTCACTTTTACTGGAGAG  
CAGTTATGCACTCTTTCATGTTATCTCGGCAATTCTTTGACGACCTTAG  
TAACAGCGACATATTTCGAATCATGACATACTATTGTTTGCACCGTTGTC  
ACGCGCAGTTTGCTGATACAAGAACTTCATACAGACTTTCTTGTGAGGCT  
ATTGGCCTCATCAAGATAGCTGGATTCCATCGGGAAGAAACCTATGAATT  
CCTTCCCTTCGGTGAACAACAACCTCAGAAGGAAAGTTTACTATTTACTTC  
TTATGACAGAGAGATTTTACGCTGTATATATTAAGTGTGTCACGAGCCTA  
GATACAACAATAGCGCCACCACTACCAGAGGTTGTAACAGACCCTCGTCT



TTCTCTGGAAAGCTTCCTTGAGGTGATTAGAGTTTTCACTGTACCTGGAA  
AGTGTTTTTATGATGCTTTGGCTACTAACTGTGTCGATGATTCCTGCACC  
GAAGACTCTCTAAAAAGGATATGGAACGAACTTCATACCACATCACTTGA  
TATAGAGCCATGGTCTTACGGATACATCGATTTTCTGTTTTCGAGGCATT  
GGGTCAGGACACTAGCGTGGAAGCTAGTACTTCATATGAAAGGTATGCGG  
ATGAATTTTCTTTTGAATACTAATAACACACATATAACCAGTCGAAATTGC  
TAGGGACATGTTGGGAGACACGTTTTTAACTCCGAAAAACCTGTATGATG  
TACATGGTCCTGGAATACCGATGAAGGCATTAGAAATAGCCAATGCATTG  
GTAGATATCGTAAATAAGTATGATCACAATATGAAGTTGGAGGCTTGGAA  
TATTTTGTGCGATGTATCTAAGTTCGTTTTCTCCCTGAAACATTGCAATC  
ATAAAATGTTTCAAAGTTTTCACTAAATGTCAGAGTGCTCTAATCGAT  
TTGCCTATCTCTAGACCACTGCGCCTAAATGATGATTCCAAAGATGAAGA  
CGACATAATTCCTTAATTTATTGTTACGCCGTTCACTTATACGAGATAG  
ATATACTGATAGAGTGTGAGTGATATTCTTAAGTCTTGCTTTTCGAGGGT  
GTAAGAAGCTATGTTCTTCAGGCGAGATTATTCTACTCCTGCCTTACTTG  
TTTGTAATATTTAGTTCTGATGGTCATGATAATTCTATATACAGTTACAT  
TAAGTATATACTTAAGCGGGCAGCTTACTAATATAAATTTTGTGGCATT  
TTGTTGGGATATGAGAATCATGTATCGTTGATTTACAAAGCGAATTTACG

TTACCAGGAATAGGGAATACTCTCTTGAATTCTAACATAAGCATATAAAT  
GCTGAAAGAATACGTCAAAAAGTAAATTTACAGAATTAATAATAAATAATT  
GTTGCCGGAACATGAATAGAGTGTATCAATATACAATATAAAAATTCAAG  
CATTTTCATTAACGGGAATGAAAAATTGTATATTAGTACTTCTTTTTGC  
AAGATATTTAAACCTAGGACCCTCATCACAATGATTCATTTAAATCATT  
ACGTTTTTTCAGAACATAATAAACCTCTAGTTGAAAAACTTCAAAGC  
CGCAACAAAACCAAAAAAAGTCATAATGTCGAGTAAAAATAAACTCGAT  
GTGTTAAGTACTAGTTATATAAAAATAAAATTAATAACGCCGTATCTACC  
TACTGGCTAAAAAATCATTTGTTCAACAGATGGGGTGCTTCGCCCTT  
CATCTACCACAGAAGTTTCCAAATCTTCCTTCGGATCTTTAACATTAATT  
TCTGCAGCTGCTGCTTTGGCAGCTGCAAAGGGTCGACTTTAGTCGACTT  
GAACTTTCTTGCTGGAACACCAAGTCTAAACAATTCATTTATCTCAATAA  
AAGTCCTGCCAGCAGTTTCTGGTAGGTCAATTACGGCCCAAAGTAGAGTG  
GCAAACATAACCCTCCCCAGAAAAGCCCGACTTGGCACCCAGTTCCA  
TTTTTCTGAGTTCAATTGGTACATGATCAAACAGTAGTTACAATAGATG  
CCATATTATATGCGTTACGAGCCAGAATAATCGATTTAGTTCTTAGCCTT  
GAGGATGGTATTTTCGGACACTAAGCAAACACAACGGGAGCAATACCCAA  
ATTGTAGAAGAAGGAAAGAACCATTAAGAGAAACCACTTCCCATTTCAG

CGCCATGCGAGTCGGAGCATCCCAAACCTCCTATGATAAACAATGAAACT  
GTTTGTATAGCCAATCCAAATGCGTAAAGGTCAAACCTACCAAAATATTT  
TGAAGCCCACCAAGAAAGAAATGTTGCGGCAATACCAAGACAATATTGGA  
TAATACTGAAAGTGAAAGCCGTATCAGTACCAACTCCAGCTTTTTTCATAA  
AAGTAAGTTGAATTACCAATTAATGATGTACCACAGGTGGTTTGACCGAC  
CCAACATAACAAGCTATTCTCGTTCTTCTCCTATTAACACTGTCCTTCA  
GACAATCCCAATAGGAACCTTCTGAGTCTGACAGCTTTTTTTTCCTTTTCA  
ATGGTACTTTTGATATTATCTAGCTCCATACTTACCAGTAATTCCTTCTC  
GGTCCTTTACCACTCAATGTTCTTTCAAGTGATCTCCTTGCTTGATCAA  
TCCTTCCTTTTTTAACCAGCCACCATGGAGACTCTGGTGCAAAAAAATA  
CCTATTGCAAGAGGAGCAGGCCAGATCCACTGCAAAGCAAAGGTAGCTT  
ATATCCTAGTTCTGAGTTAGGGTACTTATTTTGGGAGTTTTTCATAATAC  
CAGCAGCGAAAAGTTGACCGAACGTCCAACATAAATTAGAATAAGTCGTC  
AAATAGTATCTTAGGGCCATAGGACAAATTTCAGAAGCATAAGAAACGGT  
CAAACATTGGAAACAACCCCATGGCATAACCACACAATACTTGTCCCACAG  
CAATCATACCCAAACCCTTGCAAAAATACAGAATAAAGGTGAATGCAGCA  
AGAAGAATCAATGCCAAAATCAATGTATAGCGATTACCCATATAATCTAC  
AAAAGGCCCAGTCATTTGCAAACCTACAATTTACCAGCCGTAACGCATA

AGGACAAGCCAATTTGCCAGGAAGCTGAAATTCATAATCTCCTGTATTG  
CTATTCAAAGAACCATATTTTTTTTTGAAAAACAGGCAGGGCATAGAAAGA  
TCCTAGAATGGCTGTGTCATAACCCTCTTGAATCAATGTTGTGGAAACTA  
ATAGTGACCAAGCAGCAGCTT

>21.18-252.1

ACTTTGGGCTTACGCAATGATAACAGGTTTCCATTTTTTTGCCATTCTAA  
CCTTCTTAAAGTAATATATATTATATAATATGTAATACTTCTTGTAATAT  
GGTTGAAAGAATTAATAAATATTCTATTCAAATAACTTTTTTAAGGACCA  
ATAATTACAAATAATAAAGTTTAATTGATATAATGAATTAATATTATATT  
TAATAACATATTAAAGGTTATAATTTAATTATGTATACTTCAAATATATA  
TATTTATATATTATTCTCTTGATAATTATAAATATATTGAGAAGTATTA  
AAGAATAATAATATTAATTAATTAATGAACGTAAGTAGAATTAATTAT  
AATAAAAACAAATATTATAAAATAATTTTATTATTTAATTAATTAAAAAT  
AAATCAACTTATAATAATAAAAAGTCTAGTCTGATATAAATAAATATATA  
TTTTTAAAATGTAAATATATAATTAATATAAACATCAGATTAATAATAAG  
TATATATATTAATATAATAGCYTGGCCCGTCACCGGCGGGGGGACGCCGA  
AGGAGAATAAAATACTCTCCCATCCTCCCTCTAAACCCACCGGTGGTAC  
AAATGATTGAATTAATAACTAGTTGTGAATTCTGTAATGCCAAATACCAT

GGCAAGATTTATGTGGTAAAGTTGGCGAGGTAAATTTGTTTCATAGCTAAA  
TATTAATTGAAGTGTTTGCCTAGGCAGACCCTAATCAGCGGCATTTGCTT  
TGAAAAAGAAAAGAAGCAGTCCATGTTTGAACAATAGTTGACCCTCTTTT  
TTGGATATAGGACCACGCAATCATTTTGGTGGGGAAACAACACTATAGCAAA  
GCAATGAACAAAAACAGCAAAGAATGACAGGTTTGCAAATAATGCTGTTT  
GAGAACTTATTCGTGTCGATTTGTATTCACGCTCCCCGACCGACATCGAC  
AGCTGTTGAACATCGACTTTTATGTCTCACTTTTAACAACCTTCGAGGATT  
GGCGAATGCATTATTCATGGTATAAAATGTGCTAACGAAATATGGTTGAT  
ATCTTTT

>263.3-5.25

TTGAGAGATGCGGGTGCTGTATTATTCGGCCACTCTACGTTAAGTGAAAG  
GGCAGACATGAGATCATCAGATTACTCTGAGGGCTACTCCGCCAGAGGTG  
GACAAGCACGTTGTCCTTTTAATCTTACTGTCAATCCAGGTGGTAGCTCC  
TCTGGTAGCGCTAGCTCCGTAGCTGCTAATATGATAATGTTTTCTTTGGG  
TACTGAAACTGACGGTAGTATTATCGATCCTGCAATGAGAAATGGTATCG  
TTGGTTTTAAACCAACCGTTGGTTTGACTTCAAGATCTGGTGTAATTCCA  
GAGTCAGAACATCAGGATTCAACGGGGCCGATGGCTAGAACTGTCCGTGA  
TGCAGTATATGCCTTTCAATATATGTGGGGGGTTGATGAAAGAGACGTGT

ATACTCTGAATCAAACCGTAATGTTCCAGATGATGGTGATTATGTGAAA  
TTTTTGACCGACAAAAAAGCTCTCAAAGGTGCWAGATTTGGTTTGCCCAT  
GGAAAAAAGCTTTTGGTCACTTGCCAAAAAAGATGAGATTCCTAGACTTT  
TAGAAGTCATCAAACCTGATTCAAGATSCCGGGAGCCMCTGTTTTATAATT  
AATMCYGGACTTTGGGAAATCTAGAATGTAATTTTCAGGATAAAKGGCTG  
GGATTTGGAACCCTTGGATCAGCAAATGAGGAGTGAATTTTACTGTGGT  
AAAAGTTGACTTTTTTACAATAACATTCAAGTCTTACTTGAGCGAACTGGA  
AAACACGAATATCCGCTCTTTAGAAGACATTGTTGCATATAATTATAAAT  
TTACCGGTAG-GAAGGTGGATACGATAGTACCCACCCTGCCTTCTCATCT  
GGTCAGGTTTCTTTCTAGACTCTCTGGCTGGGGA

>1.1-173.1

ACAAAATATCGAGTTCGTCGCAGAGCTCACGAACACGTTTCAAGAAGTAT  
GGATGATACATTCTTAGACCGCCAGCACCCCTGCACTATGCTTCCATCAC  
AACACCAGAACTTCACTATGGTGTGTATTAATAATCTCAGCGAATGGTT  
TTACGTGAGTTCCTCAACCAGTTTCTAACGTCCTTTTCAACAATCA  
AAGCGGACTTCTGGGGCTTTGCAGAATATGTTTTTCAGGGAGAAATCCGTT  
ATAAGTACCATGTCTTGAATTGACATGGTCGCAAACCTGATACGGCTCCAA  
AGGCGTCACCGTGGTACCCCTTCTAATTGTCAAAAACCTTTTTTTTCGAT

GTATCTCCCATTGAATGGTAGTATTTTAGAGCCATCTTCATTGCATTATC

AACAGAAATAGACCCGAAATC

>13.18-295.1

CGGTTTCATTAACATGGACAATTTTAAAATGAACTTCGGATCTTACAAGC

ACAGTACCGGAGAGTACTATTTGAGTAACGTGCGTATGGGTCTTTTGGTT

GCAATGTTTCAGTATAGGGTGCGCTATAGGTGGCCTTATGTTTGCGCGTCT

GGCTGATACTTTAGGCAGAAGACTAGCAATTGTGATAGTAGTGTGGTGT

ATATTGTAGGTGCAATCATCCAAATCAGTTCAAGCCACAAATGGTACCAG

TATTTTGTCCGGTAAAATCATATACGGTTTAGGTGCTGGTGGCTGCTCCGT

GTTGTGCCCAATGCTTCTGTCTGAAATAGCTCCCAAGGATCTGAGAGGTG

GACTCATTTTCATTATACCAATTGAACATGACCTTTGGGATTTTCCTAGGT

TACTGTAGCGTTTACGGAACACGTAAATACGACAATACCGCACAATGGAG

AATACCTATTGGGTTATGCTTTTTATGGGCCCTAATTATCATCATTGGTA

TGTTAATGGTTCCAGAGTCACCAAGATATCTAATCGAATCCGAAAGACAC

GAGGAGGCACGTACTTCCATTGCCAAGATAAACAAGGTTTCACCAGAAGA

TCCATGGGTACATGGAGAAGCAGAAGAAATTATTGCAGGTGTGC

>49.2-149.1

AAATGTCATTATTTACTTTATTTGCTGTCACTTGCTTCCATCCGCTAAAA

AAATATCAAAAAAGACCCCGATAAAATATTCATGGTCTACGCCCTACGC  
CGCACTTTCTCTAGGGAAGCATTTCAACTACAGGGTTACATGCCATCTTA  
TTATAATAGCACTGCATATAATAGTATACAGGAACTTAGTTTAAGAAATG  
ACTTTTTTATTAGTCAAGTAGATAATTACATGAAAAAGACATTTTAGTGG  
ATGAATCTATAGTCAAGGCGCTTCATTCCTAGATCAGTAGTAGTGCCAA  
GTAATTGGTCCGTTCTTCTTTTGTCAATTAAGTTCCATTTGCGTTCCTTAT  
ATCTATTTCTGCTGATATAGTAGAACTTTGTGGCAACTGCCATGCAAATG  
TTGAAACAAGCAAATCCTAGAAGAGCCTTGTTACCCTTGACATAGTAAGG  
TTTATCGTCATTTCTGTACAAGTTAGAGGCAATAATTGTTCCAATCTGAG  
CACTTATATTGTATAATGCTGTCCCTATCGCACGCGATCTCACCGAATTT  
GAAATTTGCGAAACCCAACCTGCAAGAATGGAATGTGTGTAGGGAAGACC  
AAGTACACCAGTGAGTAGTACGTACTTTATCCATGGATTTGTATCTGTTG  
GCAAAGCGACTAAAGAAACAATAAAAGGAAGCACCCAAACGTTTCGCAATT  
CCTACACAAAGTGATTTCTCTTTTAATTTGCGTGATAGCAATGCCACTAA  
TGGTAGATTAATTAATAGCAAAGCTTGACCTGGAATTGCCAAAATATTTG  
AAAGAAAGGTGGAGAAATTCATGCTTTTCAAGATCAGCGACATGTAAGGT  
GTAACGGTTTGTAAAGATATAAATCCTGTAATGCCTTGTATGAATAGTGG  
CCAGAGATCAAATTCTGTTAAGGTATACAAAATTTCTTAAAAGTAACGG



GTTGCCTATTGCTCATATCGCCCTTTGATGGATCATCTCTTAAAATTCTA  
TTAATCATAATCTTCTCCTCATACTCAGAGAAAAGCGATTTCCCCTTATG  
GAATGCAGACTCACCAGTTTGAGTGGGGCCCCTGCGCATCAAATAAAAGG  
ATGCCACACC

>30.1-128.1

GCTTACCTGGAACTAATACGAGCCCGATTGCTTGACATTGCGTTCCTAA  
AAAAATAGTAGGCCAATCAGTTTAGCTTCGACTTGAAGAAACACATTA  
AAAAACCCTGAAATCGGAAATGATAACTTGGCAATCCGTAAGCCCTTAAG  
TGAACATTTATGACGGATCTCCGATTTTTTTTTGCACCGTATTTCAATT  
CAATCTATAACCGGCTCAAGAGTGCACCTTTGCAGTATCTACCACCTACC  
GCTGCACCAGTGAATACTGGGGAAGCGTTCTCACAAATCACCTGGCAAAT  
ACCCGAGGAAATATTATTTGCTGATAAGATGCTAGGACCCTCCTCTGCAA  
AGCTGTTTCCCGCGTTCGATAAGGGTCCGTCGCGCAGTCTGAGATAGTAC  
AAAATTTAGCAGGCGGATAACAGGGAATTTTGTGATAAGGTGGGGCTATC  
AGTTCGAGAGAACTGAAAAACGCTATCGCATAATAACGTCATGGTAAGAC  
AGTACCGTTCGTCCAAGGAGGCGGCTAATCAATTCCGTTTTATTGAATAG  
GTTGATGCATTGCGTAAAGAATTACATGTATATAAATGAAGCAAAGAAAT  
ATCAAACAGGAAATTATGAGGGCAGTATCTACCGAATAATCAGAAATAA

AAGAAGACAAGAAAAGAGTAACAGAAAGAACAATTCAACATGTCAGGGGG  
TGCGAGCACGAATTCAAATGCTTCCATAGACGAAAAAACCTAAACATCA  
CTTCGGAAGCTGAAATTA AAAACGAAGATGTATATGCGGAACCTGTCCTA  
AGTACAGTCTTATCACCTAACGGTAAAGTTGTTTACATCAGTGACAAGGT  
AGATGAGGCTATGAAATTGGCCGACGAAGCCAAGGAAATTGAGGTTACGC  
CAGAAGAAGACAGAAAACACTACGCTGGAAAATCGATTATTGTATGTTTCCT  
TTAATGTGTATACTGTATGCCGTCCAGTTCATGGACAAAATTTCCACAAG  
TTCGGCTGCGGTTATGGGATTAAGAACTGACTTAAAAATGCATGGTGACC  
AATACTCCTGGGTCACTTCCGCCTTTTATTTTGGTTATTTATTCATGAAT  
CTAGGTCCGGTACAGTTAATTTTCCAAAAAGTAAACATATGTCCAAGAT  
GCTTGCAATTTTCATCATTGTATGGGGATTACTCTTGGCCTTGCATGCTG  
TTCCATCGGTTAAGTACTCATCTTTTATCGCATTGAGGGTGCTTTTAGGC  
TGTGCAGAAAGTGTTGTCACACCCTGCTTCACCATCATCACTGCTCAATA  
TTGAAAACAGAGGAACAGTTCACAAGAATCTCAATTTGGTTTGGTATGA  
ATGGTCTTGGGTCCATTCTGATCAACGCGATTGCGTACGGTGTCTATATT  
CATCAAGAATCCTATGCTATCAAGGGCTGGAGGGCTTTGTTTGTATCAC  
CGGTGTAATTACAATTTTCGTTGGGGCCTTGATATTTCTCTGGATTCTG  
ATGATCCATCAAAGGCAAGATTTTATCAAAGAGAGAAAAATTGATGGTT

GTCCAGAGAATTAGATCCAACCAACAAGGGTTTGGTAATCACGAAATCAA  
AAAGTACCAAATTGTCGAAGCTTTGAAAGATGTCAGGACTTGGTTATATT  
TCCTTTTCACTGTGAGTTCTAATATTCCTAATGGTGGTATTTTCGAGTTTT  
ATGAGTATTCTACTGAACAGCGATTTTCGGGTATTTATCAAAGGATACCTT  
ATTAATGGGACTGCCTACTGGTGCTGTTGAACTAGTTGGGTGCCCGCTTT  
TTGGTATTCTGGCCGTATACGCAGCTAATAAGAAAATACCATTTTGAAG  
TACAAATTGGCTTGGGCCATCTTTGCTGCTGTCTTAGCATTGATTGCTAG  
CTGTATGCTAGGTTTTGCAACCTCTTCAAAAAAGGCAAGACTGGCTGGTG  
CCTACTTATGGTATATCTCCCCTGTTTCGTTTATTTGTGTCTTTCCAAT  
ATTAGTGCTAACTCTTCAGGCTACAGTAAAAAATGGACTGTATCTTCAAT  
AAATTTGGCTGCATATGCTGCTGCCAACCTTGCTGGCCCACAAACATTTA  
TTGCGAAACAGGCCCCCAAGTACCATGGTGCCAAGGTTGCCATGGTCGTT  
TGCTATGCCGTTATGATCGTGCTTTTATCTGCATTA CTCTTGATCAATAT  
GAGAGAGAATAAGAGACGTGACAAGATAGCTGCTGAAAGAGGTTACCCCG  
AAGAGACAGCAAATTTGGAATTTTCTGACTTGACGGATTTTAAAAATCCA  
AACTTTAGGTACTCTATAAAGTCTCATTTTCGAGACAACTCTTTTTCAA  
TAAATACACTGTAATATCAAATTTTCAATTAATCAATTTAGAACTCTCGAGG  
GATAGAAATGGTGTATGAACTAAAAACGAAAGAGGGAGTATAGGTACGCG

TTATAGCATGCGGTGTGTGGATGTTCTAACCTTCAGAATAGTCAAAACGT  
TCAGCCGTACCGTAATGGTTCATCACCTGGGCGGCTAAGAGGGCAACATT  
TCCTTCGTCTTAACAATTTACTACAACAAGATAATACAACGTCAAGGAG  
CAACAGAAGACATTACGAGAACTGAACGTGATAAACAGAATATAGTGACG  
TGCGGGTCGTCATAGTGAGCTTAGTCTGAAGCACCTCCTTGCTGTGGGAT  
GTACTACCGAATATCTTGTATCGATATTTCTGCTTACCAAAAAGGCCAC  
TAAAAAGCTCTTCATTCAAATTTCCACGTTGAATCAAGTAACAAGGACTT  
CTCACATGTTCAAAGGTTGAGGATAGGCCAAGTTCAGCAACATAATGTCA  
GGATACGTGGCAGTTATATCTTGGCCTCATAGAAGAGTTTGTCTTTTCTG  
TACCCTAAAAAGCTTTCAATGACATGATGTTTTGGTCAATTGATACAACC  
ATTGGGGAGTATAAATTTTTTATCATCTTGTCAAGAAACGTGGAAGTTG  
TGTCATGACAAATAGAGC

>14.6-R

TTCTATGCTCAACTCTCTCGAAGAATATCAAGCATATCAGTTTACGAAAT  
CACAAATTTGCTACTGTATCTCAGAATAATAGCGAAGAGCAGAAATCCC  
ACAGTGGGGCTAGTGGGTCTATTGACACGTTGACAGTCATTTTTAACTCC  
TTGTTTGTACATTGACTCTAACACGTCAAGAACGAGCCCTACGACACCA  
ATAATTTTCATCCAAGAAAATATTGCCTTTCTTTTTGCCTGATTGAAAAC

AGGTTTTAGGCACGTGTTTGTAAAGTTTACAGAATTCTTCTAGAATAA  
TTTTAAAGTATGGACATATTGCTTGGGAAGGCACAAGGCAAGGGACTGCA  
AATTGAGTTTTTAGCTTCGCAGATTCAAATAAGTGAATGATACGAAAGG  
TCGGGGACCTTCAGTCCATACAAGCCTAGTGTCAAGAACTTTTAGCGGCC  
AATATATAACCGCTGCTGATCAATAAAGCAGTAGTGAGGTATATGTTGCC  
ACAAACAAATCTTTCAGATTACGACAAGTTATGGCAGTAAGCGTAAAAAG  
AAAAGGGTGCTTTAAATCTGGCTAGCCCTTTAGTGAATAACCTTAACAGC  
GTTTCTTTTGTCAAGGCAAGCGAAAGTCATGCGATATGGTTGGGGCTTTT  
TTATATACCGTGACAGAGTGGTCCGTAAGATTTCTCAGTAGCGCCAATA  
CAAAGTCCATCCATCTCTTGGCTACCCACTTTCTCACTGTCGCAGGCTT  
GAAAAAATACTCAGAACCAAAAAATACTAAAGGAAAAAATATCATACT  
GTAGAGATAGTCAACTATAAACAGTAGCAGCGCTATGACCACTATATACC  
ACATTCGAGAAATTGACCTATTTGATTG

>14.3-F

GTACGAATTATCTTGTTAAATGTGTGCCTAAGACAGATTCTACTCTTCCC  
TATGCGTCAAAAGTTGATGAACATGATTCCTAAATCATCAAGAACTGACC  
GACTATGTTGAATAAAAGTATTTTCTGGGCCCCAGAAAGTTTTATTTTGA  
ACTTGTTGAATTTTTATTAATCATACTAACCTAAAAACGGCATTCCAGGA

ATTGCGTCAGTAAAATATGTGGCATCACTTATTCTAGAACGTATAGTTTT  
CTCCCCTTATCTAGACATATATAAAGGATCAATATTTCTAACAGTGAGTG  
GTAATTTTAAACATCCTACATCTAGAAACCATACAAGACAGAATGCAATA  
CATGTGTTGTATAGCACCTTAAAATCTGGCACAAACTACGCCCTGCTTTC  
CTATCTGGGAAACACTGTTCTTTTCGATACTTAGGGCATGCTATAATATGC  
TTGTTATACACATATCAAAATTCCCTTCTTACAACAGAATACCGAGTAAC  
CTTTACCTTAATCAAATGGCCTCAAATCTCCTTCTTATAAAAATTAATC  
ACCTAGAACCAATAATTTTATTATTATCATTTCGCAAGCAGCAGGCTTTCA  
AAAAATGGGGTCAACAAAAAACTCATAGATAGCTGGATTCAAGGAGTAAC  
CAATCAAATAGTCATTTCTCGATGTGTATATAGTGGTCATAGCGCTGCTA  
CTGTTATAGTTGACTATCTCTACAGTATGATATT

>22.11-F

ACTGATCAAGAATGGCAAGCTGATTTCCGTTTTTTGAAATGGAATGATAT  
GTACTTTTTTCAACAAAATATATGGGATATACCATGTGAATCTGTTTAAA  
TAACCCTGGGAAAATTGTGACTCGAATGGTTCTTGATTCAATTGTTTCCGT  
TTTACTTCATATTTTTACTTTTCATTAGTTTCTATTGCTTTTATTCAATT  
TGCGATTAGTGATGTGACTGATAATTTTATAAAAATTGTCTGCTTGCAG  
ATGGTAGAAATATCGAAGAAATAAAGCTACCATAACAAAGTTCGTCTAGA

AGCAGACATACTTTATTTTCGGGATTTCTTGGTGGATGGTGTGGTGGTTCGT  
ATTATTTACGGACACGCGAAGAGACGAATCTGTCCATAACAACATCTTCT  
CTAGTCGCAACTATATGTATTTCTTCAGATAGAATAGATTACATTACGGT  
TGTGTTTTTGTAAACAGCATCACATTTATCGCCTCACAGATTCAGTTTGAT  
ACTTAAATTGGTATATAATGCAATCGAGCATATATTATCAGGTGATAATA  
ATCTATACATGAACCAACCAAGATCAATGATAGACACCTCATCAGTGCTC  
ACTTCTTCAGCCATCCGATGTTCCCAATTTTAAAATACTTCTACGGTAG  
CAAATAATGATGTTGGATCGAGGTGTTATTATCAAACAACCGTTTTACGT  
TCTA

>22.16-R

CCGGTACATCTCGGGTTTTGTCAACCTCTCCGACTTCGTCAAAGATTTG  
GCCAAAAAACGACAAGGGAATTTACTACCTGTCAAAGGTGAGAATGGGG  
CTGATTGTTTCGATATTCAACGTTGGTTGCGCCGTGGGCGGGATTCTTTT  
GTCAAAGTAGGTGATATATATGGCCCGCTATTGGTTTAATTGCGGTCA  
CGTCTATCTATGTCGTCCGCATCCTAGTCCAAATCACCTCGACACATAAA  
TGGTATCAATACTTCATCGGCAGAATCATTCTGGTTTAGGCGTGGGAGG  
CATTGCCGTCTCTCCCAATGCTAATATCCGAGGTGTCTCCGAAACAGA  
TCAGAGGTAACCTTGTCCTCAACTGTATCAACTGATGGGGACAATGGGTATT

TTCCTGGGCTACTGCACCAACTATGGTACAAAAAACTATGACGACTCAAC  
CCAGTGGAGGGTCGGTCTTGGTCTTTGCTTTGCTTGGGCCACGTTTCATGA  
TCAGCGGGATGATGTTTCGTGCCCGAGTCCCCACGTTTCCTGGTCTGAAGTT  
GGTAGGCATGAAGAAGCCAAACGTTCCATATCGAAATCTAACAAGGTTTC  
AGTCGATGACCCTGCTCTATTAGCTGAATATGACGCTATAAGGGCGGGTA  
TCGAGCTCGAAAAGCTAGCAGGTAACGCATCATGGGGTGAGCTTCTCTCC  
ACAAAAACAAAGGTGTTCCAACGTGTGATCATGGGAGTCATGATCCAATC  
TTTGCAGCAACTAACCGGTGACAACACTTCTTCTATTACG

>re-00610

GTGTTACCGCCACCTCGAGTGCACTTTTTTTAATAAAGATCTCGTGTAAT  
TGTCCAAATCTGACTTTTTCTTATAGTCTCGCTGGAACCACAGTGCGGCT  
TTGCAATTTTGCAAATCGGAATTTGAGTCACAGATCCCAGAAAAACTCCA  
CACCTTCCCCACGCAGCAAGCGATAACGAACAAGTTGTCAAATTAGACCC  
ATAATAATTTTGAACACTTCTACCTGTTTCATGTCTTTTCTCGAACACTGT  
CATTTGAAATTATGCACTGTGAAAAAAGAAACAAAGACCAAAGAATAA  
TATAAATAGTGAAGTAAAATGTGTTGTAATGCACATGGATCTTGTAAGTGC  
TCAAACCTAATATTTCTATTGTAGAAAAATTTTCGATTTAAAATTGTGAA  
ACCGATTATATAAAAGTATATTAGCTGACATTAACGTCTCAAACCAGGT



CAATAGCTTTAAAAATAAAAATAAATCCCTGCAGAATACTCGGAAAGAAT  
ATGTCACGTAAGAGCTCGACTGAATATGTGCATAATCAGGAGGATGCTGA  
TATCGAAGTATTTGAATCAGAATACCGCACATATAGGGAATCTGAGGCGG  
CAGAAAACAGAGACGGACTTCACAATGGTGATGAGGAAAATTGGAAGGTT  
AATAGTAGTAAGCAGAAATTTGGGGTAACGAAAAATGAGCTATCAGATGT  
CCTGTACGATTCCATTCCAGCGTATGAAGAGAGCACAGTCACTTTGAAGG  
AGTACTATGATCATTCTATCAAAAACAATCTAACTGCGAAATCGGCAGGA  
AGTTACCTCGTATCTCTTTTTCTATTATAAAATGGTTTCCTCATTATAA  
CTTTACGTGGGGCTATGCTGATTTAGTGGCAGGAATTACAGTTGGCTGCG  
TACTCGTGCCCCAATCTATGTCATACGCACAAATCGCTAGTTTATCTCCT  
GAATATGGTTTGTATTCCCTCTTTATTGGTGCGTTTATATATTCTTTGTT  
TGCCACATCGAAAGATGTTTGTATTGGTCCGGTCGCTGTAATGTCACTAT  
AAACTGCCAAAGTCATTGCTGAAGTTCTAAAAAATATCCCGAAGACCAG  
ACAGAAGTTACAGCTCCTATCATTGCAACTACCCTTTGTTTGCTTTGTGG  
GATTGTGCCCACTGGGTTGGGTATACTGCGTTTAGGCTTTTTAGTGGAAC  
TTATTTCTCTAAATGCTGTTGCTGGTTTCATGACCGTTCCGCATTTAAC  
ATCATCTGGGGTCAAATTCCGGCTCTCATGGGATACAACCTATTAGTGAA  
TACCAGAGAAGCAACGTATAAGGTTGTAATTAACACTCTGAAACATTTAC

CAAACACAAAGTTAGACGCCGTTTTTGGCTTGATTCCGTTGGTAATCCTC  
TATGTATGGAAATGGTGGTGTGGTACATTTGGTATAACTTTGGCAGATAG  
ATATTATCGAAATCAACCAAAGGTAGCAAATAGACTGAAATCCTTCTATT  
TCTATGCACAAGCTATGAGAAATGCCGTCGTCATAGTAGTTTTTACTGCC  
ATATCGTGGAGCATAACAAGAAACAAATCTTCAAAGACCGTCCAATCAG  
TATTCTGGGTACAGTTCCTCGGGCTTAAATGAGGTGGGAGTTATGAAAA  
TCCCAGACGGTCTGCTATCTAATATGAGTTCAGAAATACCTGCTTCAATT  
ATCGTTCTGGTGTTAGAACACATCGCTATTTCAAATCCTTTGGTAGAAT  
TAACGACTACAAGGTTGTCCCTGACCAAGAACTTATTGCGATTGGTGTGA  
CAAATTTGATAGGGACATTTTTTCACTCATATCCAGCAACTGGGTCATTT  
TCCAGATCTGCTTTGAAAGCAAATGTAACGTGCGCACTCCGTTTTTCTGG  
GGTATTCACTGGCGGTTGCGTTCTATTAGCACTTTATTGTTAACTGACG  
CCTTCTTTTTTCAATCCTAAAGCGACACTATCGGCGGTTATTATTCATGCT  
GTTTCTGATTTGCTGACTTCTTACAAAACCACCTGGACCTTCTGGAAGAC  
CAACCCGTTAGATTGTATCTCATTTATCGTTACAGTGTTTCATCACAGTAT  
TTTCATCCATTGAAAATGGTATATATTTTGCAATGTGTTGGTCATGTGCA  
ATGTTACTATTGAAACAGGCTTTCCTGCTGGTAAATTCCTTGGTCGTGT  
TGAGGTGGCAGAAGTATTGAACCCAACAGTACAAGAGGATATTGATGCTG

TGATATCATCTAATGAATTACCTAATGAACTGAATAAACAGGTTAAGTCT  
ACTGTTGAGGTTTTACCAGCCCCAGAGTATAAGTTTAGCGTAAAGTGGGT  
TCCGTTGATCATGGATACTCAAGAGAATTGAATATCAATACCACAGTTC  
GGCCTCCTCCACCAGGTGTCATAGTCTATCGTTTGGGTGATAGCTTTACT  
TACGTGAACTGCTCAAGGCATTATGACATTATATTTGATCGTATTAAGGA  
AGAAACAAGGCGAGGCCAACTTATAACCTTAAGGAAAAAGTCAGACCGTC  
CATGGAATGATCCTGGTGAATGGAAAATGCCAGATTCTTTGAAATCACTA  
TTTAAATTTAAACGTCATTCAGCAACAACGAATAGTGACCCACCGATATC  
GAATGGAAGCAGTAACGGAGAAACATATGAAAAGCCGCTACTGAAAGTCG  
TCTGCCTGGATTTTTCCCAAGTTGCTCAAGTGGATTCAACCGCTGTTCAA  
AGCCTGGTTGATCTGAGAAAAGCTGTGAATAGGTATGCGGATAGACAAGT  
CGAATTCCATTTTGCCGGAATTATATCTCCATGGATCAAAGAAGTCTTT  
TGAGTGTTAAATTCGGAECTACAAATGAGGAATATAGTGACGACTCTATT  
ATCGCTGGCCATTCTAGTTTTCACGTTGCCAAAGTTTTGAAGGATGATGT  
GGATTATACTGATGAAGACAGCCGTATAAGCACATCTTACAGTAACTATG  
AAACATTATGTGCTGCAACTGGGACAAATTTACCGTTTTTTCATATCGAT  
ATACCCGATTTTTCTAAATGGGACGTTTAGTGTAGTAGATAGTAAGTACT  
TTAATTACCCCCCTGTTTTTAGTTATACATGAAAAGATAATTGTGTTAT

TAATGTAGATTACCATCAAATAGCTGGAATATTTATTATTTTGAGTGTGT  
TGAATGGCGAAAGTAAAAATAAATTTTATAATTTCTGAAAGCATTAGTA  
CACGAAAAGGGCCGTTTTTCAGTAGTTTAAGGCGCTGAAAAGACATGGTCT  
AGAAGTTGACTTGAGCTTGAGCCTATTTTCTACAAATGTCCTTTGAAAAT  
ACAAAAATAAAAAATAAAAAATGCATTTAAGTATTAAGCTTATGCTAGATAG  
AGCAACATTTTCC

>re-07736

ATGTTGCGCCATTGTCCCTAGGAATTGAAACTGCGGGAGGTATTATGACT  
AAACTGATTCTAGAAACTCAACAATTCCAACCAAGAAATCAGAACTTT  
TTCGACCTACGCAGACAACCAACCTGGCGTTTTTGATTCAAGTCTTTGAAG  
GTGAAGAACTAGAACAAGGGACAATAATCTGTTGGGTAAGTTTGAATTGA  
GCGGCATTCCACCTGCTCCCAGAGGTGTACCACAAATCGAAGTCACGTTT  
GATATCGACGCTAATGGTATTCTTAATGTGTCTGCGTTGGAAAAGGGTAC  
TGGTAAGAGCAACAAAATTACGATAACTAATGACAAAGGTAGGTTATCGA  
AGGATGATATTGACAGGATGGTTTCCGAAGCAGAAAAATACAGAGCG

>re-09125 and YBR294W\_Sb(SUL1)

AAATCTCAAAGAAAATTTTTCCCACTATTCTCTATTATTAACTGAATG  
TTTTTTTCTTTAGAATTAACCTCGTGAAATTGTTCCAATTTACATCTTGAA

GTGGCGGAACACAGTGCGGCTTTGCAATTTGTGAAATTCGGAATTTGAG  
TCACACACAGATTTAGCGGGAACCTCCACAGCTTTTCAGGCGCAGCAAACG  
ATAACAATCAGGGACCTGCCAAATTATATTGTAGTTGAATTTGAGCTTT  
CTGCGTATTTACATAGTATCGGACACACTTTCATTCATTTGATGCCATGT  
AAAAAATTAATATAAATGAGGTAACAAACAACATAATTCAGTATAGAA  
TTACTTATGTTTTCTACGTTCTTACCCAGTAAAAAAGCTTTCTTGGTAC  
AACATCAGATCAGTCGCAAGTCCCCACTAGTTGATGATTTTGTCCAGCTT  
GAAAGTGTTACTAGTACAAAGTATTGTTTAGTTCTACTTTTTTTTTCAAAA  
ATGCTTGAAATAATATTTACATATGAGCTCAACTGAGGTTTTTGACAA  
CCAGGAAGACCTCGATATCGAAGTATTTGAATCAAATACAGCTCTTACA  
GGCAATCTGAGACAACAGCAAACAGAATCGATTTTCAAATGAGGAAAGT  
TGGAAGGTCAATAGTAAGAGGAAGTTTGAGCAAACGAAAAATGAGTCCTC  
GGACGTTTTGTATGATTCTATTCCAAGATATGAAGAGAGCACAGTTACTC  
TTAAAGAATACTATGGCCACTCCATAAAGAAGGGTTAACTGCGAAGTCG  
GCAGGAAACTATATTTCTCCCTTTTTCCATTGTGAAATGGCTTCTCA  
TTATAACCTTACGTGGTGTTATGCGGATTTAGTCGCAGGAGTCACAGTCG  
GATGTGTGCTTGTCCCTCAATCCATGTCTTATGCACAAATCGCAAGTTTA  
TCACCTGAATACGGTTTATATTCCTCTTTTGTAGGTGCCTTTATCTACTC

TTTATTTGCCACATCGAAAGATGTTTGTATTGGTCCAGTCGCTGTTATGT  
CATTGCAAACACTGCTAAAGTCATTGCTGAAGTTTTGAAAAAATACCCGCAA  
GATCAAACAGAAGTTACGGGTCTATTATTGCCACTGCCCTCTGTTTGCT  
GTGTGGACTTGTTACTACTGGCCTAGGTGTA CTGCGCTTAGGATTTTTGG  
TGGAGCTGATTTCTCTTAATGCTGTTGCTGGTTTTATGACAGGTTCTGCA  
TTTAGTATCATTTGGGGTCAAGTTCCTGCTCTTATGGGCTACAACAAATT  
AGTGAATACCAGAGAAGCAACATACAAGGTTGTTATTAATTCTTTGAAAC  
ATCTACCAGATACAAAGTTGGATGCTGTTTTGGTTTGATTCCATTGGTAA  
TCCTCTATGTATGGAAATGGTGGTGTGGATCGTACGGTGTAAC TTTGGCA  
AATAGACATTACCAGAAACATCCGAAGATAGCTAATAATTTGAAATCTTT  
TTATTTCTATGCGCAAGCTATGAGAAATGCTGTCGTTATAGTTGTTTTTA  
CTACGATATCATGGAGTATCACAAGGCATAAATCGTCAGAAGAGCGTCCC  
ATAAGTATTTTGGGCACAGTCCCTTCTGGTTTGAATGAAGTAGGTGTCAT  
GAAGATACCCGAAGGCTTGCTATCAAACATGAGTTCAGAATTGCCCGCTT  
CAATTATAATTCTAGTTTTAGAACATATTGCTATTTCAAAATCCTTTGGC  
AGAATTAATGATTACAAAGTGGTCCCTGACCAAGAACTTATCGCAATTGG  
TGTGACAAACTTAGTAGGAACATTTTTTCACTCATATCCAGCAACAGGTT  
CATTTTCTAGATCAGCTTTGAAAGCTAAGTGTAACGTTCTGACTCCATT

TCAGGTTTATTCACCTGGTGGTTGTGTTTTACTAGCACTTTATGCTTTAAC  
TGATGCATTCTTTTTTATTCCCAAGGCAACATTATCAGCGGTAATCATAC  
ATGCTGTTTCCGATCTATTGACCTCTTATGAAACCACTTGGACTTTTTGG  
AAGACTAACCATTAGATTGTGTCTCATTATTACCGTTTTTATCAC  
GATATTCTCGTCCATTGAAAATGGTATATATTTTGCAATGTGTTGGTCAT  
GCGCAATATTGTTATTGAAACAAGCATTCCCTGCCGAAAATTCCTTGGG  
CGTGTCGAAGTCGCTGAGGTATTAATCCAACACTGCAAATAACGTTAG  
TACTGTAGTATCACTCAATGAATCTAATAAGCAAGTAAAACTACTGTTG  
ATGTTTTGCCAACTTTAGAATATAAATTCAGTACAAAGTGGGTTCCGTTT  
GATCATGAATACTCGCGAGAGTTGAATCGCTGTGCCAAAATTTGTCCGCC  
ACCGCCAGGTGTCATAGTATACCGATTAAGTGACAGTTTTACTTATGTGA  
ACTGTTCAAGACACTACGACATTATATTTGATCATATTAAGGAGGAAACA  
AGACGAGGACAGTTGATAAATTTAAGAAAAAATCCGACCGACCATGGAA  
CGATCCTGGCGAGTGGAAAATGCCACCTTCATTGAGTACCCTATTTAAAT  
TCAAACGAAATTCGGTGACGGATAATGAGGATCCACCGGTATCGAATGGA  
GGCATTAAACGGGGGATCGCATGAGAAGCCGTTACTGAAAGTAATATGCCT  
AGATTTTTCTCAAGTTGCCCAAGTAGACTCTACGGCTATTCAAAGTCTTG  
TCGATTTAAGAAAAGCTGTGAATAAGTATGCAGACAGACAGGTTCGAGTTT

CATTTTGCTGGAATTATATCACCATGGATTAAGAAGTTTATCAAGTGT  
AAGCTTTGGAACACGAACGAAGAATTTAGTGACGAATCCATAATTGCTG  
GTCATTCTAGTTTTACGTCACAAGATTTTCAAGTGATGATGATGCAGAT  
TATACTGATGAAGATAGCCATATAAGTGCACCATATAGTAATTATGGAAC  
CCTGTGTGCTGCAACTGGTACAACTTACCTTTTTTCCACATTGACATTC  
CTGATTTTTCTAAATGGGATGTTTAATATTGAAGGAGCATTACCATAACT  
CGTATGATTATAACGAAATAAGAAATATATAGTTTATCTATGTAGATCCT  
TTTTAAATGTGCTAGTATCTGCCAGTTTGAGCATTATCAGCAAAAATA  
TCAATAAACTCACGTATGCAAATTGGAAGCTTCACCAGTACTTTCACACA  
CAGAAGATTGACAGGATAAAAGTGGTGAATAGTTAGAAAACGAGATTTTA  
GTTGCTTAACAATTCAATGGTTGAATAAAGATGACACTGGTCTTCCACCC  
TCGGCCAAAAGGTATTTAGATTTATATTTGTTCTATAGGTGTATCGTAT  
GATTACATCCAAATACTAATAATGAAAACCAAAGAAAGAACTGTAGCAG  
TTGATCCCGCTATTGGTGGTGAGATCGCCGATAGCTCCAGTGGGTGTTAC  
GAACGGTGATTTGTTCTGCTCTAGTACCAAATTTGACTTTTAGTGATGT  
AGTTACCAGGCTCGGTAAAAGTAAAGGATCTACAGCATGATGCTTATGAT  
GCATATGCTGTAGTTCAATTTACACTTGAGTATTATAAAAGTTACATTAC  
CAATTCTACTTTTTTACAGAAAATGGCAAGGAAAAGTACTACTATTTCG



TGAGCAAAATATATTTTTCTTGAATATTTATAAAAAGATGTAAATTAAGA  
ATTACATATATAACTACATAGTTTAAAGTCGATAAAAGGATACCGGGAGC  
TGTTATATGATGCGAGTAGTCTGAAGAATATGCAGTAACCGTTTCATTAA  
AATATCGAGAATGCAGAGAACATTGTAAGTAAAGTCATACGTTTGGCATA  
CTCTAACTTTAAAGTCATTAGAACTATGATATGATTCTTTCAGTTTTAT  
CATATTTATTACAGCATCATTTTAATATCATGTCATTTGATATTCGCCAC  
CAAAACGAGGTGCATTTAAAATGATACCGTTTATGATACCGGCAATTA  
CCGGCAATTGGTAAAGTCAAGAACCATCCAGAATAACACCAGGCGACCAT  
TCTCCAGTTAAC

>re-09468 Seq\_YBR297W\_Sb

TCGTCTAGCATATCCCTGGCAATTTGACTGGTATGTGGGCATTGTTACT  
ATTCGAAAAAAAAATTGGCGCCCTTCATTCGAAACACCAGCCTCCAAGCCA  
GTGCCCTTATCCAGTGCCGAGAAAATGAAATGTCTACGTATCCGTAAGAC  
CATGGCTCTATTTCAAGTGACGATGTATGAAGTTCTTCCATATTTTTTT  
AAAGAGTCTTCTGTACAAGAAACATTCGCAGAGTTACTAGCTAAAGCATC  
AAAGAAATGTTTTCTGGTAGAGTGAAAACCCTGATCATCTCGAGAAAAC  
TATCCAGGGAAAGCCGAGGATCAGTTACAGCTTCAGGTTGCGGTGGTGAT  
ATCGTGACATCCAGGCTTGTCGCACAACGAATATACACAGAATAGTATCT

CTCTGTAAAAGAAGCAAATAGTAACTTTCCGTCTAAGCTGCTGCTCAC  
CAAATGAAAGAGATTCATACGTTTCTTCAAGATGCAATTCGCCGACCTTT  
ATAAGGCCAACGGCTTCACAAGAAAGTCTGTATGAAGTTCCTGTATCAGC  
AAACTGAGCAAAACAACGAAGCAAGCAGTAATATGTCATAATCTTGAATA  
TGCCGCTGGTACTAAGATCGTCGAAGTCTTGGCGCGATGACATACAGAGA  
ACTGATAACTGCCTTCCAGTATAATGGATTCCTTCTCAGATTCTATCCC  
GGTATGCAAATCGCTAAGAGTGGCTGCTGAAAGAGCTACCAAAAACCAAGT  
AAACGTGGCAGTCATCGAATTTTTCTTCCAAAAGCTTGTGAAGATCATCA  
TAGCAGAGTAAAGGCCAGATCACGTATAAATTGTCATGGTACAGCTTTAA  
ACATTGGTCAATCAGCACCTTTGGAACCTTCGTGAGCACCTTGGAGCAG  
TCATTGTACTGCTGTCCTCATTAACCCTCTGCACACAGACTACTTTTTTT  
GGGCTTCTTGACCTAATAGACTTTGGACCTCGTTTTCTTAACGTTTGGAG  
ATAAGTACAATTCAAATCGCGTTGAATACAACGACCGCACGGTCCTTTAC  
CATCACATTTTACTCGACGAACGCGACAACAGTCGCATGCTTGCTTGACC  
AAAGTCATATTAAGTCAGAGATATTTTTTTCAAGACGTTTTTTGTCTGA  
CCTTTGACGTGACTTTCCATTCCGCCTTAGTATAAGATCTTTGAAGCA  
TTTGCCCTTGTCGGTATCTAAAAGCCACTGAATATAAAGGAACAGAAAAA  
TAAC

>re-08456

TAGCGATTTCTATCAGACGTCTTTTGTGCGAGTCCATTGCTCCTGCTATCG  
TCAACAGCTCCGTGATCTTCCACGATATGTCTCGTGGTGTAGTCATTGGC  
AACGTCAAGAGCAGAGTAAGTGTCTCCAACGAAGATACTTATTACGACTG  
GGTTCAGTACCAGATGGTGAGAAGTGGTGATTGGGGAACAGAATGGTCTC  
CTGTCTCTGACTGTATCTGGAGGGACGAGAAGGACAAAAGCGACGACACG  
CCAAATAAGTTTCCCATCTCAGTGCCGTTTAGCTGGACGTCCGAGTATTC  
TATTGTCGACTACGACAAGGATGCTAACGATGACGGCCTAGACATGGGGC  
TCATCAAATCGTTGTTGAACAAGAAGAATTGGCACCAAATGAACGAAACC  
GTCTCCGAATCGAGTATTATGGTGGCACCGATGATAAAGCCATACAACGT  
GGTCTAACTGTGGTACCGGAAGCACATGATTTGGGCGGGCGTTCAAAGC  
AAACTTGTAGCGGGAGTCGCGATTCACTAAGCGTAGCATGTAGTGCGTGG  
TCCAAC TATTATCGTGTGGACGCCCTGCGTCCGATGAACCTATCGCATC  
TTATATGACGAAAATGTTGGAAGATGAGGTT CAGTGT

>re-00728

TAGATACATTTCTGAAGCAACTAGTGAATCGCTGCAAGAAAGAAATTTA  
ACCAGCTTTACTAATTTGGTCATTGTTAGCGATCATGGTATGAGCGATAT  
CGTAGTTCCTGAAATGTTATTATATGGGAAGACTTACTGGACAAAAAT

TGGGGAAGGATTATGTATCGCACGCATATCTAGAGGGTCCGATGATGGCT  
ATATCGTTGAAAGATTCCGGAAACATCAATGAGGTTTACCACAATTTAAA  
GACTTCTATAGATGAAGACAAGTATACGGTTTACGTTAATGGAAATTTCC  
CCAAAGAATGGAACHTTAATGATGGAAAAATCATCACATGGCGTCAATC  
TGGAATTGTGC

>re-00782

ATGAAAAGAAAGCTGAACAGGTTTCAGCAATATTCTAGTCAAGGCGTTCCA  
AAATTCTGCTGTTTATCAGATTAATCATAATGCACAACTTGTTAAAAAGT  
TAAAAGATGCTCACTATTTTTTGGTATACTCCGGTAACACTTTTGAGTCT  
AGTGGTGTATATATGTTTGCTGCTCCTGAATTATTAGGTTGTGACAATGA  
TACCATCTTAAGAATTTTGTGAAATAAATCCATTGGCTGTGATTTGGTCC  
CAAAGCTTGACATTGGAAATAATTTGAATGTGTATGATATAACAACAAAA  
GAAACAGATTTGAACATTCTAGTATCGAAAGGGGAGGATTCCAAAGGAAT  
TCCTTACTACCGAGTAGTAGCAAATTCGTCAAGTGATTTGGACAGG

>re-08781

GCCAATCGTCTAAACGAGGAAAATAAAGGGCTTAATTTAATCAAGAGCGA  
CGCAAATGCATTATTTTCTTGGTGCACTTTTGAGCTTAATGTAAAGGGCT  
AAAGTAACATTTGTGACGTTTTTACCGCAGAAGAGTTGATATATTATTCA

TACGGAAGTGATTTGACAAGTTTTTATCAAAATGGTCCCGGCTATAATTT  
GATCAAATCTATAGGTGCTAATCTTTTCAATGCGACAGTAAACTACTAA  
AAGAAAGTGCGTATATGGATCAGAAAGTGTGGC

> re-08265

GAGAGTTTCTTCGGCTACTGATAGAAACAGCAACGCAATTTCTTCCTCAT  
CAGCGTTTTTAAACAGCATTACGAAGTCCAATTTCAAACGGTGCTACAACA  
CCTGCTAAAAAAAAAACATAGGATGGAACCACGCACAATAAGGGCCCTG  
GTTGTAGGTTGTGTATTGATGTTTTTCCAACAGGCCACTGGTTTCAACGC  
TTTCATGTATTACGCGCAATAATATTTTCTAGATTTAATATGAAAAACC  
CTCTATTACCTGCAATTCTAATTGCTTCGACTAACTTCATATTCACCTTT  
TTTGCAATGTACACTATGGACTCCTTGGG

>re-01802

TTTTGGTCTCTACGTCGGATCATGAAACGGGTGGTTTAGTCACTTCAAGA  
CAAGTCACTGCTAGCTATCCTCAGTATGTCTGGTATCCATAGGTGCTCGC  
CAACGCCACCCATTCAGGTGAGTTTTTGAAGAAAAGTAACTAGTAGATTTTG  
TTCATGAGCATAAGGGCGCAAGCAGCAAATAAAAAATTTTCATCAAACAT  
GAGATCCTGGAAAAAGATTTGGGTATTTACGATTACACGGATAGCGATTT  
AGAAACATTAATTCATTTGGATGACAACGCAAATGCTATCCAAGACAAAC

TGAATGACATGGTATCATTTAGGGCCC

>re-04523

TAACAATTTTTTCATTCATAAAAATTTTACCGTTCATCTTCTCTTCACT

TTTTTCAGATTCACACCCTCTTGAAATTCTATAAATGCAAACCTTTTCAA

CGGTTTCTTGAGTGGCTTTTTCTTTAGCATATTTATTGTTATCTTACCAT

AATTTGGCTCAAACAAATCTCTCAAGTCCTGTTTACGGCAGTTTTTAGGA

AGATTGCCGACATATAATGTCCTCCTATCATTTAGTACTCTTTTTTTTTTA

TTTTTGATTTTCAGGAACAACCTGTTGTTGTTTTTTTTCCGTTGACGTTA

TAAAACTCTATC

>re-01840

GTGCGGCGGGCCCCCTTTGCGAAGGGGGCCGAAATATCGGATCTTAGTAAT

AGTTCTGCTATTGGATGTGGTATTAGCATAAATCAAGAGGGAGGCGATGG

TTCTATTAGGGTAAAAGAGAGCAGCTTGAGGAAGAAATAGGAAAGGATGA

GTACAAAATATCCGACAACGATGAGTTGCCGAGAGGCATTTGATCAATTG

ACGAGTTGCTATTTCGATTGGAGGGCAATTTAGAAGCTATTACAGATATGG

AGATTTTACATCATGTGACAAGCAGGTGTCCAAATTCAAGTTTTGTATTA

TCCACGGCAATGACCCTGTGAAAGTGCAGGAATGGTATAAAGATCAGGTT

TCCGACAATAAGGCATTGGAAAATTACCAGTGGGA

>re-08426

TTTACATCGTTTATCACAACACTAGTTCTTTATCTGGATTGGCAAAAGGGTT  
ATCGATTCTCTTATCATCACCCCTTTCTAGCCCTCGGCTTAGAAGCTAAGG  
AAGGGGAAGATTTCAATTTAGTATTGAATTGCCTTTAGCGGATCCATTA  
TTCTTTGGTTCTGTATTAGTTAGTTTCCAGTGTCTGTTCTTTTCGGCTGC  
AGCAAACGTGTCGTGAGCTTTCTGCTTTAAGT

>re-01868

ATATACTTTCTGAAGAAAAAATACATCTACAAAGCCTGCCAACACCATAT  
CTATATGTTTCAGACGGTGGCAAGTACTTACAAACGTACGGAATGTGGAT  
TCTTCAAACCTCCAGATAAAAAAATGGACTAATTGGTCAATTGCTAGAGGT  
ATGGTTGTAGATGACAAGCATATCACTGGTCTGGTAATTAACCACAACA  
TATTAGACAAATTGCTGACTCTTGGGCAGCAATTGGAAAAGCAAATGAAA  
TTCTTTTCGCGTTATGTTTTGGCGTTCCCCCAGCAGCTATTTTAGTTAGT  
TCCATGCCAATTCCTG

>re-09195

ACGTTCTCCTTTATCGTTAGGAATTGAAACCCTAGGAGGTGTTTTCACTA  
GATTAATTCCAAGAAATTCCACGATTCCCACCAAAAAATCCCAAATTTTT  
TCCACTGCCGCAGCAGGTCAAACAGCAGTCGAAGTTAAAGTTTTCCAAGG

CGAGAGGGAGTTGGTCAAGATAATAAATTAATCGGGAATTTTTCTCTCCA  
AGGTATTCCCCCAGCACCAAAGGTGTTCCCAAATTGAAGTCACTTTTG  
ATATTGATGCCAATGGAATAATCAACGTTTCAGCAAAGATCATGCCAGT  
AACAAAGACTCTTCTATTACTGTTGCTGGAGCTTCAGGACTTTCTGAAGT  
TGAAATTGAACAAATGGTTAACGAGGCCGAAAAATATAAAGGCCAAGATG  
CCAG

>re-09184

TCATGATTGTTCTTCGATTTGGTTATAACTTTAGGAGGTGATGGGACTG  
TCCTTTTTGCTTCATCCATATTTCTAAAAATATACCACCTATCGTCCCA  
TTTGCCCTTGGTTCATTGGGGTTTTTA ACTAATTTTGATCAAAAAGTTCA  
AGGAGACATTATCGCATGTCTTAACGGAAAAGGTCCGCATCAATTTACGT  
ATGCGATTGCAGTGCAAAGTTTATCATAGAAACGAAACTGAAACTGACGC  
TGCCACCGGAAAGCGGGTATGTTTTATTGATTTTGTCTGAACATCAGC  
TCCTCAATGAAATAACCATAGATAGAGGTCCAACCTCCTTGCTTGCCTTA  
TTGGAGCTTTACGGACACAATTCATTGATGACTAAGGTCCAAGGCGATGG  
GATTGATT

>re-09442

GGTATTGATACCTCAGGAAGACAAATTCAAATTTTACAGGTTTATGCAG



GAACAATTTCTGAGGAAGCCAAGAAGCTGTCCCGAATTTCTAAGACATAA  
AATGTTTTTGGCGTCCCCCAAACCTCCTGCACGAAAACGGTATACGATGCA  
ATAGTTCATCATGCAGGCGAGTTTATGATTACTTACCCATATGGTTATCA  
TGCAGGGTTCAATTACGGCTACAACCTAGCCGAATCGGTGAACTTCGCTC  
TAGAAGAGTGGCTGCCGATCGGAAAGAAAGCTGGGAAATGCAATTGTATT  
TCCGACTCAGTGGAGATAGATGTTAAAAAATTGGCCAAATCTTGAAAGA  
CCATGATAATAAGGACCCGGAAGATGCACTCTATCTCAATCAATTACCAA  
ACCCTGCTCTCCCTTGCCCTCACAGGCCAACACTAAAGGAAATGGAGAAT  
AGTTCACTTCGATCCACAAGCCCAGATGTGGTCAATTTTTCAAGTTTCAA  
AACAAAGAGTTCGG

>re-02222

GACAGGAAGGATGTTCCGGATAAGTTTAAATTTGATACCGTAACGAAAAC  
TGGAATGGTCAAGCTTCGTGTTTTCAAAGACGACCTAATATTCAAATCAC  
AACGTCTATAAATCTGTTTTCAAGTAGGAAGCATCCCTTCAAGTCATTTA  
CGGCGGATGGAGAGGGCTTGCCGTTATTTGCCTTCGCACTAAGAAACCT  
TTTTTTGTTAGGCGAGATTATGTGGGTTTTCTTTTTTATCGATACGAGAT  
ATTGAAAAATGGGGACTTCCCTGAAGAGTCGGATTATGAGGTAAAAGGAG  
AGTGCGACGGT

>re-13481

TTAGAGGTACTCTGGTTTCGTGTTACCAACTTATGATCACCTTGGGTATT  
TTCTTGGGTTACTGTACCAATTATGGTACCAAGACTTACTCCAACCTCTGT  
GCAATGGAGAGTCCCATTGGTCTAGGTTTCGCCTGGGCTTTGTTTATGAT  
CGGTGGTATGACGTTTGTCCAGAATCTCCACGTTACTTAGTTGAAGTTG  
GCAAAATTGAAGAAGCTAAGCGTTCTATTGCTCTTTCAAACAAGGTTAGC  
GTTGATGATCCAGCTATCGCAGCTGAAATTGAAATCGTCCAAT

>re-13501

GCCATCGAACATGCAAGGCAATTGATAGAAGCAATGCCATTTGCCATAGT  
AGGGTCTGAAAAAATTCGATAATGGGCAAGGCACTCAAGTGGTTGCTAG  
AAAATACCCATGGGGTCTTGTAGAAATTGAAAATGACTCACACTGTGATT  
TCCGTAAGCTCAGAGCGTTGTTACTAAGAACTTATTTACTAGATCTTATC  
TCCACTACCCAAGAAATGCATTACGAAACATATAGAAGATTAAGACTAGA  
AGGTCACGAAAACACAGGGGAGGGCAATGAAGACTTCACTCTTCCAGCTT  
ATTGCA

>re-03412

GACGACGACGGCGACGGCGACGATATGGACGAGGAAGAGTCCGATGAAGA  
GCAAGTGAGCGATATAGAGAACGATTTAGAGATTGACGAGGAGTTCCACT

ACGATCTGGGCATGAAAGTGTTACCCAACCTTTTGTACCAGCATAAACTAA  
GTGCTAGACTCCAGCAAGCCCTGGATAGCCAAGTACGAGATCAGCATCCG  
TGGCCACGAAAACGAAGGCGTGTCTCTGGAGCAACTCGACGGAGGCTACG  
TCAGAGCCATGCAACTACTACCAAGGGTGCCGGCGCAGAGGCGGGGAAC  
CAAAGGTCCTTCATCCTCTACACGGACCTGAGCAGCGAGTCC

>re-03399

TATGAATCCAGTGGTTATGAAGGCTTGTCTAAATTCGATCCTGAGTTTAC  
ATGGACAAAGGATGAGGAAAAGAAATTGGTAAGAAAAATGGACTTGAAGA  
TTTTTTTTGTGGGTTTTTATTATGTTTGCCTTTTTGGATTTAATAAGGAA  
AAATATTGCAAGGGCAGTTTCAGACAACTTCATTGTTGACTTGAAAATGA  
ACACGAACGACTACAACCTTGCCAAACTGTTTATCTAGTTATATTTCTA  
GCAAGTGAAC TACCCGGCAATCTGCTGTCCAAAAGATTTGGTCCAGAAAG  
GGTCATTCCGTTCAAATTGTGTTGTGGAGTGTAATTTGTATTACTCAAG  
CTGGTCTGAAAAATCGAGGTCAATTTATTGCTACTAGATGCTTATTAGGA  
ATGGTGCAGGGCGGGTTCAC

>re-10979

GACAGCATTACAGACTGGACAGGCAAAACCAATGATATTTCCCAGAAAAA  
TGGGAGATCAGCGCCTGTTCCAGTTTTCTTCTATAGTAACAACATCGATT

CTACACGCAGAGCAACAACAACGACAGATGGTGAATGGTTCAAAGCACA  
ATCCAGAAACGTCATCTTGAATGTATGACTACGCCAAATATAACTACCAA  
GGATAATGACAGTGTACGGAAAAAATCGAAACCTGAAAAGGTAGTAGTAC  
CAGGCCACTTTCTTAAACCTCTTCTGAATGAAATAACCTCTTCCAATGAT  
ACAGAATTCAAACCTTATAACAGCATCAAATATAAGGACAAGTATGTCAA  
AATGTTTATCGATAGCCAC

>re-10959

GACCAAGAAAAAACAGTGATGGTTTCAAGTGAGGAAGTTTGTTCCTCCGG  
TCGCATTCTTGGCACAAGTCGCAGTCGTCGAGCCCATCATAGTGCAACGT  
TGATTAGATGTCGTAAATTTATGAGTGAATCATCCATATACCAATGTCCT  
CCACGGGATCATCGCTTTTTTTCTTCTTCTCGTCCAGTTTTGTTGATCCG  
ACATTCTGTATCAACTGTATATACATGGGTCGCTTCCCGCACCACTCAGG  
TTATCCGTGCGGCCAAAACCGTCGTCAAATGGTTTATTATCGTCGACCCA  
TTGATAAATTCTATACTGATCAACTATCTCACAGATAGGCTTTGCAATTT  
CGGGCGTGC

>re-03655

TTCTTGGGACCTGAAAATAGTAGAAAAAATACAGAGGTGCTTTACAAAGG  
AATTTGATGCAATGAAAATTGCCAGAAAAAAAAGTTAAAATTTGTTTT

GGTTCAGATTTATTGGGTCCTCTATATGGTTATCAAACGCAAGAGTTTCG  
TATTAGAGGGAAAGTTCAATCGGCACAAGAGGTTTTGCTCTCAGCAACTG  
TTACTCCTGCCGAAAATGAACGGAT

>re-03652

GCCTGCTTCAGCCTATGCTACTGTTTCTATCATGTGTTTATGTATGGCTT  
TCGGTGGATTTATGTCCGGTTGGGACACAGGTACGATTTCTGGTTTCGTC  
AATTAGACTGATTTTTTAAGAAGATTTGGTAATTATAGCCATTTCAAGAA  
TACTTACTACTTATCTAATGTGAGAACTGGGTTGATTGTGTCCATCTTCA  
ATGTGGGAAGCGCCATTGGCTGTCTTTTCTTGTCTAAATTGAGTGATATT  
TACGGCCGCTGCCATGGG

>re-04287

CAGATATAGGTGCCACTAATTTAAGGCCACTGTTTATATCGTGCGCCGGC  
TGGCAGGGTCTAGGCTATGTAATCACTGTTGCCCTTGAGTTTTTTCAAAG  
ATCCGGCTATCTGCCTTTCCAAGTAAAAAAGACCCTTCTATCTCTGA  
TTCCACATCTTATGCTGAAAAATTGCACAGCGGTAAATACTTAATGCCTC  
CATATTACACAAAGGATGAACGGAACCTGATTTTCGCAGCTTTTGTTCCTC  
GGCAGCATTGGTGAAGTACCCCTTTTATTCTGTTCCATCTTCTCAACCGC  
CCTGTACCATCGCGTTCACATTGCTATGGTCTCTGTTTTCGTCGTCTTCA

TGTTCCCTATCCACTTGCTGCTTTGATT

>re-13189

TGGGCACTTATAGCTCAATGCGTTATATGCACATCACTTAGTGTCATTGC

ACTTACGTTAACTAGGACAAGAACGCAAAGCACAAGCCAGCACAAAAAGT

ACAAGTTTAAATTGCTAGATTGGGATGTA CTCTCAA ACTTCGGGGTTTGA

TTGCTTTTCGGGTTTGTATCGTGCGCTATGTTAGGATACGTTGTTCTTTT

ATATTCTCTATCTGCTTTTGCCATGAGTTTGGGCTATACAAGCAAGCAAG

GCTCATACGTATCATGTATGGTGAGGTAGGCTCTTTGGTAGGGAGACCA

ATCGCAGGCT

>re-05768

TTCTCTTTCTTACACATCATCCGATATTTCTAGCACATCAGTCAACGATGTCGAATCAT

CAACCCCTGGCCCCTCAA ACTCATA CAGTGCGCCTTCCTCCACAAATGCACA ACTGT

CCAGCTCCACTACAGAGACTGACTCCATAAGTAGTAGTGCTATTCCAAACATCTTCCC

CGCAAACCAGTTCATCAAATGAAGGTGGTTCCTCTTCGGAGCCATTGGGAAAGTCCT

CTGTCCTTGAACTACTGCTTCATCTTCTGATACA ACTGCAGTCACATCCTCCACATTT

ACCACGCTTACTGACGTTTCATCTTCACCAAAGGTAAGTTCCTCAGGATCGGCTGTCA

CTTCAGTTGGTAGTACTTCC

>re-04515

CATCACAGAGAAACCGAAACCAAGGACAATCATGATCAATTGACCTGGAT  
GAGAGCCCTCAGGCTCGGTCGTCAAAGCTACATCATGGTTAGCGACATTA  
CAAATGACGTAAGCACACCATTAAAACATGAAAGTACCGCAAAACTCACC  
CACAGCAGCGATAAAGTGGTTTCTTAAGGTATCTCTGTTAATATTTAAAC  
GCGAATGCTTTGTTCCGGCTGTTCAAGGTGGAATATAAGCATTGTCAACA  
CCGGTT

>re-11957

TTGTAATACTCTGAATTCTCGCCAACACTACTCATACCCGCTGCTCTAAT  
ACTAACTTGTCAGAGCCTTCTCTTTCCACCTTTCCTTCCCTTTATGTGAT  
TAACACCACTGTAAAAGTGCTTTCAACTGCCTTTCAATGGCTGAAACCC  
CTTTTTTTTCGGACATTGTCATGTTGAAAAAAGAAGGAAAAGAAAAACAAA  
TATGAAAAATATGGATG

>re-11984

TTATTACAAAGTACAAATCTGAGAGAAGAATCGGAAAGAGTAGAAATCTT  
GGAGTTGATGGATTCATGGGCCGAGATTGATATAGATGATGCTTTGGAGC  
TGTTAGGCTCAACATTCAAAAATCTTTCGGTTAGATCATACGCTGTAAAT  
AGGCTTAAAAAGCATCTGACAAGGAATTAGAAGTGTATCTATTGCAATTG  
GTAGAAGCTGTCTGTTTCGAAAACCTTCTACTTTTTCCGACAAATCTAA

TAGTGAATTTACCATTGTAGACGCAGTTTCTTCGCAAAAGCTGTTGGGTG  
ATTCCATGTCACTTTCAACATCACATGCTAATCAAAAATTACTGAAGTCC  
GTTTCAAGCGGTTCTGAAATCTCCGG

>re-12473

GGACCTTTTGGAAAAAGATTCTAAAGGTAATATAATCAAATAAATGAAC  
CCTCCACCACTATGGAGGATTCAAAGACCTCCATTACTGGATTGCCGTTA  
AATAAAGGCCCTCTGAAAAATTAACGAGAGTCTCTTTGGAATAA  
AAAAATGTGGGAGGCCAATCAAATAATTCGGAATAACCCTTGTTCTAG  
TGTGAAATCCACGCAAGTGCCTAAAAATTTCAACAGTTGAACAAAGATG  
ACCTGCAAACATTCTTAACAGAGAACGTAAGTGAAGGAGCAATTTGAGA  
TCAACCAAAGTTGGAAGACCGATATAATAGACAGGGACCATGACCCATG  
TGC

>re-12571

GAGGACCATGATCGAAGATTGGCATATTAACGACACTATCACACTTAA  
GTGCGGGATTTCTGGGTGATTTTATTTCCAGTTTTGTTTATGTCCAGTTT  
TGTTTATGTCCCCTCAGAGGTGTTAAAGACAAGATTACAGCTGCAAGGAC  
GGTTCAACAATTCTTTTTTCAATCTGGTTATAATTATTCAAATTTAAGG  
AATGCCATAAAGACAGTAATCAAAGAGGAAGGTGTCCCCTCTCTTTTCTT



CGGTTACAAAGCTACTTTGGCTAGAGACCTACCGTTTAGTGCATTACAGT  
TTGCGTTCTACGAAAAGTTCAGGCAACTAGCCTTCAAGATTGAAAACAAA  
GACGGTAAAG

>re-12656

CAATCAGAAAGGGTATCTTGGCCAAGATCGGCGAGTTGCCTAGCTTGTCC  
CAAAAGCTCTTTTGGACCGCTTATGCCCTCAAGGAAAAAACGTGCCATGC  
AGTGGGTTTATAAGTCGTTTGATCTTTAAAAGAATCAAACAGGCCACTGG  
TGGGCAACTGAGGTATATCATGAATGGTGGGTCTGCGATCAGCATAGATG  
CTCAAAAATTTCTGTCCAATGTCCTGTGTCCCATGCTGATTGGTTACGGG  
TTAACAGAATGTGTGGCCAACGCTT

>re-05709

TTTTGAGCGAACACCCTGGTGGTGACGAGTCCATCTTGGACTATGCTGGT  
AAGGACATTACTGAGATCATGAAAGACTCAGATGTGCATGAACAAGCGAC  
TCCGCGTATGAAATCCTTGAGGACGAATATTTGATTGGTTACTTGGCAAC  
TGACGAAGAGGCAGCGAGATTGTTGACTAACAAGAACCATAAGGTTGAAG  
TGCAGTTGTCAGCTGACGGTACTGAGTTTGACTCCACTACTTTTGTAAG  
GAGTTGCCCGCCGAGGAGAACTAAGTATTGCTACGGACTACAGTAACGA  
CTACAAAAGCATAAATTTTTGGATCTGAACCGTCCTT

>re-06296

AGCCTCCTATCTCCGCTCCAGGCCATGGAGTACGAACCTAATGTCGACAT  
CAGGTTGTTGGATTTTCGTAGTTCCTGAAGAGTGGAGCGCAGAGAATCCAT  
TGGTCGTAGAAGGAGCCGGCAGGGGTTTTCGTTCCCTATCACTCGTAAATT  
GGAAATTACGACGGATCTAATTAACATCTGATTGAGACTAGCGGCCATC  
CAGTGTACGTAGTTGTCGTGGCACGCAGCGGGCTAGGGACTCTGAATCAT  
ACATTGCTGACTTGGAATCATCTTTGCGATAATGGCTTGAGAAGCCACCT  
TTTTGGGGTCATTCTCAATGGGGAACCGAATGA

>re-13176

TGAGACAGTTTTTGCTACACACCAAATTTCTGAATATGACTGATGCCGAA  
TTTTATACTTCATTGAATAACGGATCACACTATATTCAAGAACAACCAA  
GCCACCGTCAATGTAACATTTCCCTATTGTAGTCAACTCTACGCTAAGAAG  
AGGTTATTATGATGCATATTACGGCTACTACTATAACCACGATATTCCTT  
ATTATTTTGGGGGCATTATTTGTGCATACTTTGTGGGTGTTATGCTAATT  
GCTGGTTTAATTCGTTTTTTGGACTACACTCCAATAAAAAAGTTAATCTT  
CAAGCAAAAAGTGAATTATGTGAGGGGTTATATCACGGTTACCAACC

>re-06472

TCACTTTCGAATAAATGTAGTTCAGCTCTTTCTCTTCCAACAGTGCGTT

GTCACCGGATCTAAATGAACAACAACTGACGCGAATTACAATTCAATCA  
AGCTACCCGAAATATGCTCCTGCAAGAATGCATAAATGAATGCGGCTTCC  
GATGCAAAGAGGTATCTGCCGATCAGTTACACATATCAAAAAATCCGTCA  
ACATACGCAAAAAAATAAAAGTATCCAAGAACAATAAATCCTGAAGATT  
CAACTTCGATCTCATCAGCGTTAGAGAACATTGCATCTGGATTGCACGTT  
CG

>re-13267

GAGCTGTATTGATAAATTTATCGACCAGTTTAATTTATATGATGAGCAGC  
ATGTATTTTGGCAACCAGCAGAAAAAAGAACGCTCGATTGCTAATAAAT  
AACAAATGACTACGGTCAGTTAGGGGACCATCCTACATCGCCAAGTAAAT  
GCAACATTATCGTTGGCGAAGAAGCACTAAAGAAGTATGGGTTGACCGTA  
TGCGCGCCTTACGATGATTTTTTTCAGATGTTGCTCCCAGTGAGATAAAGGC  
TGTGGAGAGTGACAGTGTACCATGTACGCAAATGCTTAAATGCTATAA  
CTCAGCAACTTTCCATACTCGAAGAATTTTTTAAACAAGACACAAAATCAG  
GAAGCTGGGCCAAGCGAAGTACACGGAAGGAAATGCGTTGTGTTACCTGA  
CGATGATTTTGAACCCATGGAGTTTTTCTCTCATCTAAAACTAATGCGC  
AATTACGAGGATGTTTAC

>re-13368

GTAGCCCAGACAATATGCGGTACATGAAGTCGATGTAGATTCTGAACCGG  
AAGGGTTTGTACTGCCGCAAAAACACTCTGAATGATTGTAAAGGGCAAAG  
TAGCTTGCACCCTTTGCATTGCACTATTCATAGCAGTACGAACCTTGTCTG  
GTAGGCATACGTATCGTCTTGTGAAAAGTCGGAAGGCAGTGAGCTAAAAC  
AGTCCACCAACGTGTAGGTGCTTGCTTGCGACAAGGCGGGCAATAAAGCC  
AAAAGCAAACCTGAATTTGTTGTTTCAGTCTCATGTTGTGTTTGAATTTCC  
TTATGCCAGTTTTTATACTAGCTGACGTATTATCCTAAATAGATGAGTTT  
CCTTCAAACCTCTTTTTCTTTTTCTTGGTTTTTC

>re-06566

ATGGCTGATTGACCCTGCAGAACCACTTGAGGTGTCGCCAAAATTAAGCG  
CCGAAGAGAAAAAAGTATTGATGCTATTGTCAATACACATCACCATTAT  
GACCATTCGGGGGGGGAACCTAGCGCTTTATAGTATCTTGTGCCAAGAAA  
ACTCAGGTCACGATATTAATAAATTGGTGGATCGAAGTCCTCCCCGGGT  
GTCACTGAAGTACCCGATAATTTGCAGCAGTATCACTTGGGTAACCTAAG  
AGTAACATGTATTAGGACTCCATGCCATACAAAAGATTCCATATGCTATT  
ATATCAAAGATTTAGAAACAGGTGGAGCAGT

>re-10363

GTAAACTTTCTAAGAATTTTACCTGAAGAAACGTTGGACATCGCCTCCA

CTCCACTTACAGAAGTAGAATTCAATTCCAGAATCCATGAATTAATCGAT  
CCCATAGCCGAAGACGTGTTGAAGTTTCTAATCTCATGCATAGACCAATT  
ACAAAGTACAACTTTAACACTAACTCATCTCCGATTTTCATTAGAGCAGA  
TTTTACATTGTTTGAATTCCTGGTCATATGAATTCGCCATCGAACAGCTG  
TTAACCGTTCAGCCATTGGTATCCCTAGTGTTTCGAGACCATTTCCAACGG  
TAATGAAAATGACATGGAGGCATTTGATGCTGCTATTGATTGTTTATGCG  
TTATTTTAAGAGAAAGCTGAGATACCACTAATGAGCAGCTAATTTCTGGT  
TTATTTGAACAGTTGATGCTCTTACAACAAAAATTAATGCCTAGCTTAAT  
CATGGATCAGCCCTTGGATGATGAATATGATGACGATCTTTTAGAAGGTA  
TGACACGTTTATTTGTGGAAGCT

>re-06935

TGCCCCATAATAAGCCAGCCTCAGCTGGTTAATGTGGAAAGCGACCATAG  
GGAGCTGATCATGTTGACCCCGTTTGGGAAGCGGGCTTGA ACTCTCAGA  
ATACAACCATAATAACAAGGAATTTCTTATCGCAATATAGCTTCTCCGAG  
ATATGAAAACAACGAAAAGGATTCCTAACAAAGAAAATAGGAAATTGAAA  
GTGGTAAAATCTGTTGTGAACTCAGAAGCTCTGCCCAAGAGAAGAAGATA  
CGATAGGAAAATTAAGAGAAGATCAAGGGAGTTGTAC

>re-07158

TTTATTCTGTTGCTTTCTTTCTCTTTTTTTTTCCCAATTCCTTTTTTTG  
CTTTTGTCCCAATCATAAATGGGTGAGTTTACCGTTTATTGGAATGGATA  
TTTTGGAAGCCCTTTGTTTTTATAGAGAGGGAAAAATACGGAATATTTTT  
GAAATAGG

>re-07429

TTATCGTGATAGATGTTGACTACAATAAGAAGCAAGACAGAATTCAAGAC  
GTTAAACTCGTACTAGCATCTAATTTTGATAATTTTGACTACTTTAACCA  
ACGAGATGGAGAGTATGAAAAAGCAACATTCTTCTAAATTCCTTAACAAA  
GTATCCTGATTTGAAAGCTTTTCATAACAATTTGAAGTTTCTATATCTGT  
TAGATGCATATTCCCACATCGAGTCCGATTCTACCTCCCATAATAATGGG  
TCTTCTGACAAAAGCTTAGATTCAAGCAACGCATCATTCAACAACCAAGG  
TAAACTTGATCTTTTTAAGTATTTACGGAECTATCACACTATATAAGAC  
AATGTTTCCAAGACAATTGTTGCGACTTT

>re-14053

TATTTTTTACTTTTGTATTTGAACATCCTGAGAAATATATTGTGGCATAT  
TCTGCCATTGTTTCTGCTTGGGGTTTTTTTTAGTTTGGATGGAAAAAGGGT  
ATAGATACAAGAAGAACATACAACCGTCAAGATGCACGAGAATTAGGTGC  
TCTCGTTGTGATACAAAGAAGAAACATCCCAAGTGGTCTAAGTATAAATT

TTGCTTGCAGTTTTTCTTGTTATATGTTTCTTTAGCCTCATTTAATATAT  
TCATTCAGTGGCAACCTATAGGAGATGAGATATTTCATAAAGAAGAGCTT  
GGGACGGGTCCAA

>re-07534

AGTATTTTCGGATTGGTGGTCTCTCAATAAAGATGGCTGGTTTGGCTCTAA  
AAAATCCGAAAATTCCAATAAAAAAAGGGATGTAACCATGACGATGCCTT  
TTTGCCAAGATCTTTTGCTCAAGCCATCTCAAAGCCGCTGTTGACTGCG  
AATGTGAATTTCAAATTTAGAACACAACGAAAAGGCAGAACTAAAGAAG  
AAAAAGGAGTCTATCAAACTGCACAGACAACGGAAGCTCAGGGTGCCGA  
CCATAATGAAGAAGACGAGGAAGATGAAGAAGATGAAGAAGATGATGAAG  
ATTTGTCTAATTTGATCAAAGTTTTTCGAT

>LBYG14145 (Sc AGT1)

CAATACTGAAAATTTTGAAGAAGGGAAAAAGGATAGTGCCTTTGAGCTAG  
ACCACTTAGAGTTCACCACCAATTCAGCCCAGTTAGGAGATTCTGACGAA  
GATAACGAGAATATGATTAATGAGATGAACGCTACTGATGAAGCAAATGA  
AGCTAACAGCGAGGAAAAAAGCATGACTTTAAAGCAGGCGTTGCTAAAAT  
ATCCAAAAGCAGCCCTGTGGTCCATATTAGTGTCTACTACCCTGGTTATG  
GAAGGTTATGATACCGCACTACTGAACGCACTGTATGCCCTGCCAGTGTT

TCAGAGAAAATTCGGTACTTTGAACGGGGAGGGTTCTTACGAAATTA  
CTT  
CCCAATGGCAGATTGGTTTAAACATGTGTGTCCAATGTGGTGAGATGATT  
GGTTTGCAAATCACGACTTATATGGTTGAATTTATGGGGAATCGTTATAC  
GATGATTACAGCACTTGGTTTGTAACTGCTTATATCTTTATCCTCTACT  
ACTGTAAAAGTTTAGCTATGATTGCTGTGGGACAAGTTCTCTCAGCTATG  
CCATGGGGTTGTTTCCAGGGTTTGACTGTTACTTATGCTTCGGAAGTTTG  
CCCTTAGCATTAAAGATATTACATGACCAGTTACTCCAACATTTGTTGGT  
TATTTGGTCAAATCTTCGCCTCTGGTATTATGAAAACTCACAAGAGAAT  
TTAGGGAACCTCTGACTTGGACTATAAATTGCCATTTGCTTTACAATGGAT  
TTGGCCTGCTCCTTTAATGATCGGTATCTTTTTCGCTCCTGAGTCGCCCT  
GGTGGTTGGTGAGAAAGGATAGGGTCGCTGAGGCAAGAAAATCTTTAAGC  
AGAATTTTGAGTGGTAAAGGCGCCGAGAAGGACATTCAAGTTGATCTTAC  
TTTAAAGCAGATTGAATTGACTATTGAAAAGAAAGACTTTTAGCATCTA  
AATCAGGATCATTCTTTGATTGTTTCAAGGGAGTTAATGGAAGAAGAACG  
AGACTTGCATGTTTAGCTTGGGTAGCTCAAATACTAGCGGTGCCTGTTT  
ACTTGGTTACTCGACATATTTTTTTTTGAAAGAGCAGGTATGGCCACCGAC  
AAGGCGTTTACTTTTTCTGTAATTCAGTACTGTCTTGGGTTAGCGGGTAC  
ACTTTGCTCCTGGGTAATATCTGGCCGTGTTGGTAGATGGACAATACTGA



CCTATGGTCTTGCATTTCAAATGGTCTGCTTATTTGTTATTGGTGGAATG  
GGTTTTGGTTCTGGAAGCGGCGCTAGTAATGGTGCCGGTGGTTTATTGCT  
GGCTTTATCATTCTTTTACAATGCTGGTATCGGTGCAGTTGTTTACTGTA  
TCGTAGCTGAAATTCCATCAGCGGAGTTGAGAACTAAGACTATAGTGCTG  
GCCCGTATTTGCTACAATCTCATGGCCGTTATCAACGCTATATTAACGCC  
CTATATGCTAAACGTGAGCGATTGGAAGTGGGGTGCCAAAAGTGGTCTAT  
ACTGGGGTGGTTTCACAGCAGTCACTTTAGCTTGGGTCATCATCGATCTG  
CCTGAGACAACTGGTAGAACCTTCAGTGAAATTAATGAACTTTTCAACCA  
AGGGGTTCTGCCAGAAAATTTGCATCTACTGTGGTTGATCCATTCCGAA  
AGGGAAAACTCAACATGATTCGCTAGCTGATGAGAGTATCAGTCAGTCC  
TCAAGCATAAAACAGCGAGAATTAATGCAGCTGATAAATGTTAA

>re-09472 and LBYG09472(Sb-MAL31)

CCATTAAAGAGCGCCACTTCCCATTTTGGCACCGTGGGTGTCAGAGCATC  
CCAAGCCGCCTATAATGAACAGCATAACGGTCTGGAAGGCCAGTCCACAA  
GCGTAGAGATCAAATCTACCATAATATTTTGGAGGCCACCAGGATAAAAA  
TGTCGCGGCAATACCAAGACAGTATTGAATGATACTAAAAGTGAATGCGG  
TTTCAGTGCTAACACCAGCTTTTTTCATAGAAGTAAGTTGAGTAACCTATT  
AGCGATGCACCACAAACAGTTTGGCCGGCCCAGCACAGACAGGCTATTCT

CGTTCTTCTCCGATTAACCTTTCCCCTCAGACAATCCAAATAGGAGCCTT  
CATTGTCTGACAGCTTCTTGCCTTCTCTATAGTCATTTTGATTTTATCC  
AGCTCCATAGCCACAAGTAATTCTTTCTCGGCTCCCTTACCACTTAATGT  
TCTTTGAGCGCTCTCTTTGCCTGCTCTAGTCTCCCTTTTTTGACAAGCC  
ACCATGGAGATTCAGGTGCAAAAAATATCGCTACTGCTAGAGGAACAGGC  
CAGATCCATTGTAAAGCAAAAGGGAGGGTATATCCCATGTCCGAGTCTGA  
GTATCTATCTTGGGAATTTTTCATAATACCTGCGGCGAACAACACTGACCGA  
ACAACCAACATAGATTCTGAATATGTCGTTAGATAGTACCTCAGCGCCATA  
GACAGATTTTCAGAGGCATAGGAGACCGTCAAACATTGGAAACAACCCCAT  
GGCATAACCACATAATGCCTGTCCCACAGCAATCACCCCTAAACTTTTAGA  
GAAATATAGGATAAAAATGAAGGCAGTCAGGAGCATTAAACGACATAATCA  
GGGTATAGCGATTACCCATTAATCCACGGAGGGACCTGTCAACTGCAAA  
CCCACAATCTCACCTGCCATGTAGCATAAAGCCAGTCCAATCTGCCACGA  
AACTGAAATTTTCATATTCTCCTGTCTTGCTATTTCAGAGAGCCGTA CTCT  
TCTGAAAGACGGGTAGGGCATAAAAAGACCCGAGAATGGCGGTGTCATAG  
CCTTCTTGATCAGCGTTGTGGAACTAATAGTGACCAAGCCGCTGCTTT  
GGGTATGTTTTCAAAGCAGTCATGAGCGGCATCATCCTTTCACTATCAT  
CGGCCTCCTTAGCATCCTGCACAGTGTGAGTATATCCGTTACTTCATTA

TTGTCGCTCAGTGTTGCTGGACCTTGGCCATACCCAAGATGGGCAAGATC  
AAACTCAGTTTTTTTTACCTTGCTCTTCCAGTTCTATCGAGTTGCATTGAG  
CGGCGCTAGAGCCACCCTCGGCCTCTATTGAACTCGAGTTACCGTTGTAC  
TTCTTTCTG

>LBYG00811-00812 (Sc-MPH2)

ATGAAAACTTATCTTTTCTCATAAACAGAAGAAAGGAAAATACAAGTGA  
CTCGAATGTATACCCAGGAAAGGCTAAGTCGCATGAACCCAGCTGGATAG  
AAATGGATGATCAAATAAGAAGGACGGCTTAGATATTGTTTCATGTTGAG  
TTCAGTCCGGATACAAGAGCGCCAAGCGATAGCAATAAAGTAATAACAGA  
GATATTTGACGCTACTGAGGATGCCAAGGAGGCAGACGAAAGTGAAAGAG  
GAATGCCACTTGCGACAGCATTGAATACATATCCCAAGGCAGCAGCTTGG  
TCACTATTGGTCTCTACAACCTTTAATCATGGAAGGGTACGACACAGCTAT  
TCTTGGAGCTTTCTACGCCTTGCCTATTTTTTCAGAGAAAGTTTGGCTCAC  
AAAATGACAAAACCTGGAGAATGGGAAATTTTCAGCGTCATGGCAAATCGGG  
CTGACCTTATGTTATATGGCAGGTGAAATTGTGGGGCTACAGCTAACGGG  
GCCCTCCGTGGATCTTGTTGGAAATCGTTACACATTGATTATTGCATTGT  
TTTTTTTAGCTGCCTTCACTTTTATACTGTACTTTTGCAATAGTTTAGGT  
ATGATTGCTGTGGGACAAGCATTGTGCGGGATGCCATGGGGTTGTTTTCA

GTGTTTGACGGTGTCTTACGCTTCTGAAATATGCCATTGGCTCTGAGAT  
ATTACCTTACAACCTATTCAAACCTGTGCTGGTATTTGGACAACTTTTT  
GCAGCTGGAATCATGAAAAATTCTCAAAAAAATATGCGGATTCAGAATT  
AGGATATAAACTACCATTTGCCCTACAGTGGATTTTGCCAGTTCCTTTAG  
CACTGGGAATTTTTTTTTGCACCTGAATCTCCATGGTGGCTAGTTAAAAAA  
GGAAGGTTTGATGAGGCAAGGAGATCACTTAGAAGAACTTTAAGCGGCAA  
GGGACCTGAAAAAGAAATACTAGTAACTCTGGAGGTGGACAAAATAAAG  
TGA CTATAGATAAGGAAAAGAGACTCACAAGTAAAGAAGGCTCCTATAGT  
GATAGTTTTGAAGACAAGATTAATCGAAGAAGAACGAGAATTACTTGTCT  
CTGCTGGGCTGGTCAAGCCACTTGTGGTTCAATACTAATAGGTTATTCAA  
CTTACTTTTACGAAAAGGCTGGCGTTAGTACTGAAATGTCCTTCACTTTT  
AGTATTATTCAATACTGTCTCGGTATTTGTGCTACATTTCTATCTTGGTG  
GGCGTCAAAGTATTTTGGTAGATATGACCTTTACGCTTTTGGACTAGCCT  
TCCAAACCATTGTTTTTTTATTATTGGCGGTTTGAGGTGCTCAAGTACG  
CACGGTTCCAAAATGGGAAGTGGTTCTCTTTTAATGGCTGTAGCATTTTT  
TTACAATTTAGGAATTGCCCGGTTCGTTTTTTGCCTAGTCTCTGAAATGC  
CATCTTCAAGACTAAGAACGAAAACAATCATTCTAGCACGTAACACTTAT  
AATGTGGTCAGTATCATATGTAGCGTTCTCATCTTATACCAACTGAACTC

TAAGAAGTGGAAGTGGGGCGCTAAGTCAGGCTTTTTCTGGGGTGTCTTAT  
GCTTTTGTACTTTAATCTGGGCTGTGGTTGACCTACCAGAACTGCCGGA  
AAGACTTTCGTGGAAATAAATGAGTTATTTAACTTGGAGTTTCTGCAAG  
AAAGTTCAAATCGACGAAAGTAGATCCGTCTGTTGTCAAAAACCCCCCTA  
AAGACGTCTCTCATAACGACCCCAAGGGAGATATCGAAGCTTCCATTGCA  
GAGGAATAG

>LBYG04711-04712(Sc-YLR092W SUL2)

ATGTCCAGGGAAGGTTATCCAACTTAGAAGAGGTAGAAATTCCTGACTT  
TCAGGGAACATAACAACACCGTTCCAGATCTTGATGATTTAGAGTTAGAGT  
ACGACCAATATAAAAATAATGAAAATAATGACACGTTTAATGATAAGGAC  
TTAGAGAGCAATTCTATAGCAAAGCACACGCAGTGAACAGCTCAAAGGG  
CGTAAAAGGCTCGAAGATTGACTACTTTAATCCTTCAGATGTCTCGTTGT  
ATGACAATTCCGTTTCCCAATTTGAAGAAACAACGGTATCGCTAAAAGAG  
TACTATGACCACAGTATACGATCTCATCTCACGGTGAAAGGAGCATGTAG  
TTATCTTAAGAGTGTTTTTCCCATCATCAACTGGCTACCACATTACAATT  
TTAGCTGGTTTACTGCGGATCTTATTGCAGGAATTACCATTGGCTGTGTT  
CTCGTGCCGCAATCCATGTCGTATGCACAAGTCGCCACGCTACCAGCGCA  
GTATGGGTTGTAAGTCTCGTTTATTGGTGCTTACTCCTACTCTTTTTTCG

CTACATCAAAGATGTTTGTATTGGGCCCGTGGCTGTCATGTCTTTGCAG  
ACCGCCAAAGTCATTGCGGATGTCACGGCCAAATATCCTGATGGAGATTC  
TGCCATAACTGGTCCCGTTATTGCAACGACTCTAGCGTTACTATGTGGTA  
TCATTTCGGCAGCAGTTGGCTTCTTGCGTCTAGGGTTTCTTGTGCGAACTG  
ATTTCTTAAATGCAGTCGCTGGATTTATGACTGGATCCGCGTTTAATAT  
CTTATGGGGTCAAGTTCCAGCACTAATGGGTTACAATAGTTTGGTTAACA  
CGAGAGCTGCCACCTATAAAGTGGTCATAGAGACCTTGAAACATTTACCA  
GATACTAAACTGGACGCAGTTTTTGGACTAATCCCGCTTTTCCTTCTTTA  
TGTTTGAAATGGTGGTGCGGAACATATGGACCAAGGTTGAACGATAGAT  
ACAACTCCAAAACCCAAGGTTACACAAAATTATCAAATGGACATATTTT  
TACGCTCAGGCTTCCAGAAATGGTATCATTATTATTGTATTCACTTGTAT  
TGTTGGGCAATCACAAGGGGCAAATCTAAATCGGAGAGGCCCATCAGCA  
TCCTAGGCTCAGTTCCATCCGGTTTCAAAGAAGTCGGGGTTTTCCATGTT  
CCACCAGGATTAATGTCTAAGCTTGGTCCAAATTTGCCTGCATCCATTAT  
TGTGTTATTGTTGGAGCATATCGCTATTTCGAAGTCTTTTGGTAGAATCA  
ACGACTATAAAGTCGTCCCCGACCAAGAATTGATTGCTATTGGTGTCTCG  
AACCTTTTAGGTACTTTCTTCAATGCTTACCCAGCGACTGGTTCCTTTTC  
AAGGTCTGCTTTGAAGGCTAAATGTAATGTCCGTACGCCGTTATCTGGTT

TGTTTTCGGGTTCATGTGTTCTTTTAGCATTATATTGTTTGACCGGCGCA  
TTCTTTTACATTCCAAAGGCTACCTTATCTGCAGTTATCATTACGCTGT  
ATCTGATCTTTTGGCCTCTTATCAAACCTACCTGGAATTTCTGGAAGATGA  
ATCCATTGGACTTCATCTGTTTCATTGTCACCGTCCTAATAACGGTATTT  
GCCTCTATTGAAGATGGTATTTATTTTGCCATGTGCTGGTCATGTGCAAT  
GCTCATTTTAAAAGTGGCTTTCCAGCTGGAAAATTCTTGGGTCGTGTGG  
AAGTCGCTGAAGTTACTGATGCTTACGTCAGACCGGACTCAGATGTGGTT  
AGCTACGTGTCTGAAAATAACAATGGTATTTCCACTTTAGAAGATGGTGG  
TGAGGATGAAAAGGAAAGTTCCACCAAATACGTCACAAAATTCCTCCAAGA  
AAATAGAAACAAACGTTCAAACAAAGGGCTTTGATTCTCCATCTTCTTCG  
ATTAGCCAGCCAAGGATAAAATACCATACTAAATGGATACCGTTTGATCA  
TAAATACACAAGAGAATTGAACCCGGACGTTTCAGATTCTCCCCCACCAG  
ACGGTGTTCTTGTTTATAGGCTATCAGAGAGCTACACCTATCTCAACTGT  
TCCAGACACTACAACATCATAACCGAAGAAGTTAAAAAAGTTACCAGACG  
TGGTCAATTAATTCGCCACAGAAAAAATCTGACCATCCATGGAATGATC  
CTGGTCCATGGGAAGCACCTGCTTTCTTAAAGAATTTGAAATTCTGGAAG  
AAAAGGGAGAACGACCCTGAATCCATGGAAAACGCGCCCAGCACCTCAGT  
CGATGTTGAAAGAGATGACAGGCCATTGCTGAAAATACTATGCTTAGACT

TCTCACAAGTGGCACAGACAGACGCTACGGCTCTTCAATCATTGGTTGAT  
TTGAGAAAGGCCATAAATCAATATGCAGATAGGCAAGTTGAATTCCACTT  
TGTGGGTATCATTTACCATGGGTGAAGAGAGGTTTAATTAGCAGAGGAT  
TTGGTACTCTGAACGAAGAATACAGTGATGAATCCATTGTTGCCGGTCAT  
ACAAGTTATCACGTAGCCAGAGTACCTCAAGGCGAAGAAAATCCTGAAAA  
ATATAGCGTTTATACCGCTTCAGGAACAAATCTACCTTTCTCCATATCG  
ATATCCCAGATTTTGCTAAGTGGGATATCTAG

>94.6F1

ATTTATGATTGCATGGTTTCTTTGACATATTTATAGTTAATATATATATA  
TATATATATATGTGTTTAATTTTATAAAAATTCCATCGTTTATATTCGAT  
TATTTTTATATGTCAACTTTTTTTTTAAGAAATGTTTCATATTTAGTCAAGT  
TCTTAATGAAAAAACGGTTGAAAGTACAAGGCAACTATCATTTTAAGAT  
GTAAAAAATTGCCAAAAAAAAGGGCATTGATGAAATGTCTCATCGCC  
CTACGACTTCTGCTGTAATCAGAACTAAATGCGTGATCGGAAGTACTATT  
AGATATTGGATGCATAAAAGATAAAATGCCAGCTAACGATGGCAGAATAA  
ATAGGTAAATATATATATATATAGGTTTTCTTAATAAAT

>157.1R1

TCAAAAAAATATGGTTCTTTGAATAGCAATACAGGAGATTATGAAATTT



CAGCTTCCTGGCAAATTGGCTTGTCTTATGCGTTACGGCTGGTCAAATT  
GTAGGTTTGCAAATGACTGGGCCTTTTGTAGATTATATGGGTAATCGCTA  
TACATTGATTTTGGCATTGATTCTTCTTGCTGCATTACCTTTATTCTGT  
ATTTTTGCAAGGGTTTGGGTATGATTGCTGTGGGACAAGTATTGTGTGGT  
ATGCCATGGGGTTGTTTCCAATGTTTGACCGTTTCTTATGTTTCTGAAAT  
TTGTCCTATGGCCCTAAGATACTATTTGACGACTTATTCTAATTTATGTT  
GGACGTTTCGGTCAACTTTTCGCTGCTGGTATTATGAAAACTCCCAAAT  
AAGTACCCTAACTCAGAACTAGGATATAAGCTACCTTTTGCTTTGCAGTG  
GATCTGGCCTGCTCCTCTTGCAATAGGTAT

>MT\_OLI1-VAR1

AAGATCTAGTATTCCCTATGGCTATTTTAGGTTTCGCATTATCAGAAGCT  
ACAGGTTTATTCTGTTAATGGTTTCATTCTTATTATTATTCGGTGTTTA  
ATATATAATAAAAAATATATTAATATTAATAATAATAATAATAATAA  
TACATACATATATAATTATTAATTAATTAATTAATAATTATTAATAAT  
ATTCTTCTACCCCTTCGGCGTCCGGCCCCCCCCGGGACGGGCGACCAGA  
CTATTAATTTATTAATATATTAATTATATAAAATATTTCTTAATAATCTT  
TTTATTGATAAGATATAAAATATAAAATATAAAATATAAAAGTATAAAAT  
ATAAATATCTTATTTTCTTCTATTTAATAGCTATTATAATAGCTATTAAT

ATACAAATATTA AATTACTTTTTATTTGTAATCTTAAATTATATAAAAAA  
GTATATGATATATTACTTAATAATATATAGATATATATATGTTTTATTAT  
AAAATATATAATAATAATATTTAATAACGTATTGAATCCAAATATAATCT  
AAATATGTTATATTTATATTCTATAAGGAAGGGACCCAATACTAATAATA  
TATAAAATATAATATATACTAATAATATATAAAATATAATATATACATAA  
ATAAAGAATAATATAATATATTAATAAATAATGATATATACATAAATAAT  
CTTATATACATAAAGAATAATATTTATAATAATATATACAGCAATAATAA  
TATAAATTAATAATAATAATATATATATAATAATATATATTGATTACTCG  
GGCTAATATTAATAATAATATGATAAATATATTATATTAATATAAATAATG  
AATTAATTCTTATATAATAAAAAGTCTGTATAAATATATATTAAGTCCGGC  
CCGCCCTGCGGGCGGACGCCGTAGGAGATATATATTAATTA AAAAGTCTAA  
CTCATT CATATTATATATAATAAATAATAATAATAAACC CGCAATTG  
GGACGAACCCAGCTAATAGTAGCTGGGTTCGTGCCCGCGGAAAATATAAA  
TAACCATATATTAATGTTTAGTCTCTCCGAATTATTAATATTAATATAA  
ATACTTCTGAAGGATTAATAAAATATATACTCCTTGCGGGGTCCCGGGCC  
CCCCTACTGGGGGCCCGGGGCTAAATATAAAATATATATATATAATAAAT  
ATCTTATAGTAATTTATTGTAAATGATAATATAATATAATATAATAAATA  
AAGAGTTTAGTTAATTATAAATAAATAAATAATACATATATAATTATT

ATTTATAAGGTAATTTTAAGTATTAATTATAAAGTATATATATTCCATAA  
AGTTAAATAAAGAATAATATTTTAAATAATTGTATTAATAATTATATAAA  
ATAATACTTCAATAATAAATATAAATATAAATATTTTAATATATATAGAA  
TACTCTTATCTTTATTTATATCTATATCTCCTTCATATATTATCCGATAT  
ATATTAATATGAACTAGACTATAAAAAATAAATACTAGGAGTATTAAAAAA  
TATTATATAGATTTATTTAGACATTTTTTTTTTATTTAACTTAGACTATTA  
TAAAATATTATTAATACTTATTAATAGATTAATAATAATTATAAATTA  
TACAATATAATAATATATAAATATACCCCGCAATTGACATAAACCCAGCT  
TATCTATGTTTGTGACCGTGGGAATAATATAGAATCTTTATTATTTTCTT  
AAATTATAAATATATTAATAAATAATATATAAATGTTTTATAAATAATA  
TAAATATAAATATAATCAATAATATTATAATTATATAAACTTATAATATA  
TATAAATAATATATACTTCTACTTTCTAATAATAATCTATAAATATATAT  
AAATATATATATAAATAAATAAACTAATATAATAACATATAAAATATT  
ATTTAATATAATAATACCTATTAGTAGTATTAATTAATAAATATATCCAT  
TATTAATATAATAATCTATAATAAATAAATATAATATAATATAATATCC  
AGTAAATATATAATGTTATATAATCTTAATAAGAATATATTATTA  
TATAAAAAGTGAGGGACCCGCCCTCCAGATCCATATGGGAGGGCGGGAC  
CGAACCCTAGTATTAATATATAAATATATAATAAATAAATAACCCGCGG

GACGAACCCAGCTACTATTAGCTGGGTTTCGTGCCCAATTGCGGGGAATAT  
ATATATTTTATTAATCTTTCATAAATATGAATATAAAATATAATAAGATG  
CTATTATAATTAGCTCCGGAAGAAGTTATTAATATTATTTACTTTAAGT  
ATTATATCTAAATAAAATCTAACTATTTTCTATAAATATATTCTAAATAT  
AGAGTAATAATAATTAAGGAGAAGAATATTATTATAATCTGATTTATAA  
ATATAATATATAAATATATAATATATATATTTTATATAGTATAATAAGGG  
TATCATATATTTAATTAGTAGGATTATATATATAATAATATATATAAATA  
TTATTAGGTGTATATATATATTGTATATTAGATAAAGTTTAATTTAACTT  
TAATATTATATTTTCCATTTTTATTAATATTAGAATTATTATATAAATTA  
TGATTAGAAGAGATATAATTTAATTTATAATTATTATTAATATTACTTCA  
TAAATATTTTTTATTATTAATAAAGTACCATTTAATAAAATAAGAGTACTAG  
TTCTACCAATATTATTACTTAATCTACCTTTTAATTTAATAGATCAACCT  
ACTAAATATTTAAATATTAATAATCTATAGGAATATTATCAATATTTAT  
ATTATTATATAATTTATTTATATTATTATTAATTCATAAGGTGTAATAA  
TATTATTATATTTAATATTATTAATATTATTTATATTATTAATATAATTT  
ATAGAAAT
