# Supplementary material for: Genome Sequence of the Lager Brewing Yeast, an Interspecies Hybrid
Source: PubMed Central journal article supplement — DNA Res. 2009 Mar 4;16(2):115–29. doi: 10.1093/dnares/dsp003 (PMC2673734; doi:10.1093/dnares/dsp003), 2009-03-04
Supplement: dsp003_3.pdf [file dsp003_3.pdf]

Figure S1. Nucleotide sequence comparisons of the chromosomal translocation regions in the lager brewing yeast with the corresponding chromosomal regions of *S. cerevisiae* and *S. bayanus*

For sequence alignment analyses, the nucleotide sequences of *S. cerevisiae* and *S. bayanus* were referred to the *Saccharomyces* Genome Database (<http://www.yeastgenome.org/>). Identical bases are indicated by red letters with gray boxes, and similar bases are indicated by blue or black letters with gray boxes, respectively. Underlining indicates the predicted breakpoints. Details of each alignment are summarized below.

1-1) Scer-chr11: *S. cerevisiae*, chromosome XI, 10149-9160 bp; Sc11-Sc11: lager brewing yeast, ScXI-ScXI type chromosome; Sc15-Sc11: lager brewing yeast, ScXV-ScXI type chromosome; Scer-chr15: *S. cerevisiae*, chromosome XV, 1056621-1057610 bp.

1-2) Sbay-c532: *S. bayanus*, contig 532, 13376-17198 bp; Sb02-Sb04: lager brewing yeast, SbII-SbIV type chromosome; Sb04-Sb02: lager brewing yeast, SbIV-SbII type chromosome; Sbay-c611: *S. bayanus*, contig 611, 48907-52796 bp. In *S. bayanus*, the chromosomal region corresponding to *YDR012W* is recognized as ORF, but not annotated. The translocation breakpoint is not specifically indicated because the

location of the breakpoint could not be determined due to unusual homology between *YBR031W* and *YDR012W*.

1-3) To avoid confusion about the results, these two types of chromosomes, VIII-XV and XV-VIII, are separately aligned. Although chromosomes VIII and XV are thought to be crossed at intergenic regions, *YHR014W/YHR015W* and *YOR018W/YOR019W*, the location of the breakpoint could not be determined. a) Sbay-c668: *S. bayanus*, contig 668, 27312-32543 bp; Sb08-Sb15: lager brewing yeast, SbVIII-SbXV type chromosome. b) Sbay-c606: *S. bayanus*, contig 606, 22955-32725 bp; Sb15-Sb08: lager brewing yeast, SbXV-nonScVIII type chromosome.

1-4) The chromosomal translocation between ScIII and SbIII was found to occur at the MAT locus. a) Based on the result of blastn analysis, the MAT loci on the ScIII-ScIII type chromosome of lager brewing yeast were predicted to correspond to the Sb and alpha type mating cassette. Scer-chr03: *S. cerevisiae*, chromosome III, 199242-201154 bp; Sc03-Sc03: lager brewing yeast, ScIII-ScIII chromosome; Sbay-chr03: hypothetical nucleotide sequence obtained by connection of *S. bayanus* contig 675, 147973-148289 bp with contig 623, 38628-37011 bp. The former sequence corresponds to *YCR038C*, and the latter, to *YCL067C*, *YCL066W* (the silenced copy of alpha type mating factors), and dubious *YCL065W* (recognized as ORF, but not annotated in *S. bayanus*). b)

Based on the result of blastn analysis, the MAT loci on the SbIII-ScIII type chromosome of lager brewing yeast were predicted to correspond to the Sc and A type mating cassette. Scer-chr03: *S. cerevisiae*, chromosome III, 199222-201147 bp, but the nucleotide sequence corresponding to the alpha type mating cassette, 199542-200965 bp, is replaced with that of the A type mating cassette (accession no. V01313, 878-2196 bp); Sb03-Sc03; lager brewing yeast, SbIII-ScIII type chromosome; Sbay-chr03: hypothetical nucleotide sequence obtained by connection of *S. bayanus* contig 675, 147953-148174 bp, with contig 666, 22173-23783 bp. Although the genes encoding mating factors are not annotated in *S. bayanus*, blastn and blastx analyses indicate that the former sequence corresponds to *YCR038C* and the latter covers the region from MATa2 to the dubious *YCR041W*.

1-5) Scer-chr07: *S. cerevisiae*, chromosome VII, 178823-179748 bp; Sc07-Sc07: lager brewing yeast, ScVII-ScVII type chromosome; Sc07\_Sb07: lager brewing yeast, ScVII\_SbVII type chromosome; Sbay\_c674: *S. bayanus*, contig 674, 83431-84356 bp.

1-6) Scer-chr10: *S. cerevisiae*, chromosome X, 453366-454521 bp; Sc10-Sc10: lager brewing yeast, ScX-ScX type chromosome; Sc10-Sb10: lager brewing yeast, ScX-SbX type chromosome; Sb10-Sc10: lager brewing yeast, SbX-ScX type chromosome; Sb10-Sb10: lager brewing yeast, SbX-SbX type chromosome; Sbay-c646: *S. bayanus*,

contig 646, 71599-72758 bp.

1-7) Scer-chr11: *S. cerevisiae*, chromosome XI, 353594-354433 bp; Sc11-Sc11: lager brewing yeast, ScXI-ScXI type chromosome; Sc11-Sb11: lager brewing yeast, ScXI-SbXI type chromosome; Sb11-Sb11: lager brewing yeast, SbXI-SbXI type chromosome; Sbay-c652: *S. bayanus*, contig 652, 59787-58948 bp.

1-8) Scer-chr13: *S. cerevisiae*, chromosome XIII, 870225-871229 bp; Sc13-Sc13: lager brewing yeast, ScXIII-ScXIII type chromosome; Sb13-Sc13: lager brewing yeast, SbXIII-ScXIII type chromosome; Sbay-c671: *S. bayanus*, contig 671, 7526-6516 bp.

1-9) Scer-chr16: *S. cerevisiae*, chromosome XVI, 96309-99947 bp; Sc16-Sc16: lager brewing yeast, ScXVI-ScXVI type chromosome; Sc16-Sb16: lager brewing yeast, ScXVI-SbXVI type chromosome; Sbay-c637: *S. bayanus*, contig 637, 7836-4211 bp.

Since YPL240C is not annotated in *S. bayanus*, the location of the gene is not demonstrated in the figure.

1-10) Scer-chr16: *S. cerevisiae*, chromosome XVI, 862374-863580 bp; Sc16-Sb16: lager brewing yeast, ScXVI-SbXVI type chromosome; Sb16-Sb16: lager brewing yeast, SbXVI-SbXVI type chromosome; Sbay-c654: *S. bayanus*, contig 654, 16023-17229 bp.

1-11) Scer-chr16: *S. cerevisiae*, chromosome XVI, 917583-922418 bp; Sb16-Sc16: lager brewing yeast, SbXVI-ScXVI type chromosome; Sbay-c654: *S. bayanus*, contig

654, 69146-73739 bp. Since YPR192W is not annotated in *S. bayanus*, the location of the gene is not demonstrated in the figure.

Supplementary Figure S2. Comparison between the 36 predicted chromosomal sequences and the optical mapping

Alignments between the optical maps and DNA sequenced-based maps from the 36 predicted chromosome sequences were created with the MapViewer software (OpGen, Inc., Madison, WI) with default parameters except for ScXII. ScXII was separated into two parts at the rDNA position and aligned to the corresponding opmap using the parameters (OM stderr of 1.0). The names of Sc and Sb show the restriction patterns of 36 provisional chromosome sequences of lager brewing yeast of restriction patterns using the enzyme *XhoI*. The names of Opmap show the restriction patterns using the enzyme *XhoI* obtained from optical mapping. The lines connect the regions of significantly similar restriction patterns.

(A), (B), (C), and (D) are the results of a comparison of chromosomes without translocations, chromosomes with translocations between Sc-type chromosomes, chromosomes with translocations between Sb-type chromosomes, and chromosomes with translocations between Sc- and Sb-type chromosomes, respectively. Green and

white indicate regions displaying similarity and lack of similarity between the provisional chromosome and the optical mapping.

Supplementary Figure S3. Unrooted phylogenetic tree of ITS sequences among *Saccharomyces* species

Sequences of ITS1-5.8S-ITS2 of the Sc- and Sb-types of lager brewing yeast, *S. cerevisiae* S288C, *S. bayanus* CBS 380 (Genbank accession no. Z95945.1), *S. uvarum* CBS 395 (Genbank accession no. Z95946), *S. pastorianus* CBS 1538 (Genbank accession no. Z95949), and *S. carlsbergensis* CBS 1513 (Genbank accession no. Z95950) constructed from Kimura 2 distances and the neighbor-joining algorithm. The scale bar indicates the genetic distance.

Supplementary Figure S4. MtDNA of lager brewing yeast and comparison of *S. cerevisiae* and *S. bayanus*

Detailed gene maps of MtDNA of lager brewing yeast and *S. cerevisiae* are shown. Genes on one strand and the opposing one are indicated by red and blue thick lines, respectively. Introns are indicated by thin black lines. Staggered lines represent genes with overlaps. (C) A gene map of *S. bayanus* determined by the mapping with restriction enzymes<sup>1</sup> is shown.

Supplementary Table S1. Cosmids covering the Sb-type chromosomes and showing chromosomal rearrangements between Sc- and Sb-type sub-genomes

The 11,794 sequences from both ends of the 5,897 cosmids were aligned against the 16 chromosomes of *S. cerevisiae* using NCBI-BLAST BlastN, and the longest alignments were considered to be significant. The Sb-type cosmids in which both end sequences (forward and reverse sequences) have relatively lower similarity (<90) to *S. cerevisiae* were selected. Then, the Sb-type cosmids covering all 16 *S. cerevisiae* chromosomes (from the left to the right telomeric regions) were selected and are shown in (A). Eight cosmids with one end sequence identified as the Sc-type and the other as the Sb-type, which were considered as candidate cosmids for chromosomal rearrangement between Sc- and Sb-type chromosomes, were also selected and are shown in (B).

Chr No; the chromosome number of *S. cerevisiae* match

Start Position and End Position; start and end position in alignment of *S. cerevisiae* chromosome with each cosmid end sequence.

Alignment Length; length in alignment of each cosmid end sequence with the *S. cerevisiae* chromosome (bp).

Identity; the percent nucleotide sequence identity.

Estimated Cosmid Length (kb); cosmid length (kb) estimated by the alignment of the both cosmid end sequences against *S. cerevisiae* chromosome.

#### Supplementary Table S2.

This file describes the matches of lager brewing yeast predicted ORFs (pORFs) against *S. cerevisiae* S288C and *S. bayanus* CBS7001. In these files, all the matches are reported for every lager brewing yeast ORF.

1. ORF ID; unique identifier of the predicted Open Reading Frame (pORF)
2. chr No; chromosomal number of lager brewing yeast
3. p\_len (aa); predicted protein length in amino acids (if single exon protein)
4. category;

s (single match); pORF in a cluster including only one *S. cerevisiae* ORF was assigned its functional role according to the description of the *S. cerevisiae* ORF

m (multiple match); pORF in a cluster including more than two types of *S. cerevisiae* ORFs was not a conserved gene synteny.

p (paralog); a single match pORF in a cluster including one *S. cerevisiae* ORF was not a conserved gene synteny.

b (match with only *S. bayanus*); pORFs in a cluster including not *S. cerevisiae* ORFs



but *S. bayanus* pORFs.

LS (lager brewing yeast specific pORF)

n (no match with *S. cerevisiae*, *S. bayanus*, or nr)

5. contig ID; supercontig to which the pORF belongs. contigID, supercontig to which the pORF belongs \_ ORF \_ pORF strand in the contig \_ start position in the contig \_ pORF end position in the contig \_ orf
6. sys.gene; the ORF name of the *S. cerevisiae* match
7. fun.gene; the gene name of the *S. cerevisiae* match
8. Feature Type; feature type field from the SGD
9. AA length (Scer); protein length of *S. cerevisiae* ORF
10. identity (Scer); the percent amino acid identity in the match of lager brewing yeast ORF with *S. cerevisiae* ORF
11. s\_sta (Scer); start position in alignment of *S. cerevisiae* ORF with lager brewing yeast pORFs
12. s\_end (Scer); end position of alignment of *S. cerevisiae* ORF with lager brewing yeast pORFs
13. q\_sta (LBYG); start position in alignment of lager brewing yeast pORF with *S. cerevisiae* ORF

14. q\_end (LBYG); end position in alignment of lager brewing yeast pORF with *S. cerevisiae* ORF
15. S.bayORF; *S. bayanus* pORF ID
16. identity (Sbay); the percent amino acid identity in the match of lager brewing yeast ORF with *S. bayanus* pORF
17. s\_sta (Sbay); start position in alignment of *S. bayanus* pORF with lager brewing yeast pORFs
18. s\_end (Sbay); start position in alignment of *S. bayanus* pORF with lager brewing yeast pORFs
19. q\_sta (LBYG); start position in alignment of lager brewing yeast pORFs with *S. bayanus* pORF
20. q\_end (LBYG); end position in alignment of lager brewing yeast pORFs with *S. bayanus* pORF
21. orf type; assignment of type depending on whether the pORF was matched higher with either *S. cerevisiae* (Sc) or *S. bayanus* (Sb) pORF

Supplementary Table S3. Other chromosomal features except for large chromosomal translocations (Table 2)

Supplementary Table S4. Nucleotide sequence comparison of genes on lager brewing yeast mtDNA with *S. cerevisiae* and *S. bayanus*

Genes that showed similarities with e-values below  $e^{-50}$  in BLASTN similarity search against mitochondrial genes of S288C and Genbank nonredundant database are listed with the results of analyses. Although some genes had a high level of similarity to more than one sequence, only the subjects that give the longest alignment between queries are shown.

Supplementary Table S5. List of truncated ORFs

ORFs with length less than 75% of that of the corresponding *S. cerevisiae* ORF are shown. 5' ORFs were shown when the genes were split into two ORFs. "Hq" and "confirmed" indicate high-quality ORFs (more than 40 phred sequence values throughout the sequences when each ORF was aligned against the corresponding *S. cerevisiae* ORF) and the ORFs confirmed by PCR amplification and sequencing. GO Annotations (biological process, molecular function, and cellular component) and Systematic deletion fields were retrieved from the SGD. These ORFs were confirmed

to have no sequence polymorphisms by PCR amplification and by sequencing or manual checks because lager brewing yeast is allopolyploid; therefore, two or more alleles are expected to exist. Note that confirmed sequences are listed in SI sequence.

1 Cardazzo, B., Minuzzo, S., Sartori, G., Grapputo, A., and Carignani, G. 1998, Evolution of mitochondrial DNA in yeast: Gene order and structural organization of the mitochondrial genome of *Saccharomyces uvarum*. *Curr Genet.*, **33**, 52-59.

1-1) ScXI/ScXV

← Scer\_YKL220C  
← Spas\_ScYKL220C

Scer\_chr11 .....TTTGTTAGCTGGCACAATGGTTTTCTTTTCCTTTGCAGTATTCA  
Sc11\_Sc11 .....TTTGTTAGCTGGCACAATGGTTTTCTTTTCCTTTGCAGTATTCA  
Sc15\_Sc11 .....TTTGTATAGTTGGTGTATGGTGTTTTTCTTTGCAGTATTCA  
Scer\_chr15 .....TTTGTATAGTTGGTGTATGGTGTTTTTCTTTGCAGTATTCA  
Spas\_ScYOR381W/YKL220C →  
Scer\_YOR381W →

Scer\_chr11 GGAAGTATTTTATGAAGCCTTCTTTTTCTTCATATCGTCTTGGTGCA  
Sc11\_Sc11 GGAAGTATTTTATGAAGCCTTCTTTTTCTTCATATCGTCTTGGTGCA  
Sc15\_Sc11 GAAAGTTTATCTATGAAGCCTTCTTATTTCTCCATATTGTGCTTGGCGCA  
Scer\_chr15 GAAAGTTTTCTATGAAGCCTTCTTATTTCTCCATATTGTGCTTGGCGCA

Scer\_chr11 ATGTTCTTTTATGCAATGTTGGGAGCATGTTGTAGTTAAGTGGCATTGA  
Sc11\_Sc11 ATGTTCTTTTATGCAATGTTGGGAGCATGTTGTAGTTAAGTGGCATTGA  
Sc15\_Sc11 TTGTTCTTTTATACGTTGTTGGGAGCACGTCTAGAATTGAGTGGGATTGA  
Scer\_chr15 TTGTTCTTTTATACGTTGTTGGGAGCACGTCTAGAATTGAGTGGGATTGA

Scer\_chr11 GTGGATATACACTGCTATTGCGATTGGATCGTTGACCGGATTATTAGAA  
Sc11\_Sc11 GTGGATATACACTGCTATTGCGATTGGATCGTTGACCGGATTATTAGAA  
Sc15\_Sc11 GTGGATATACGCTGCTATTGCTATCTGGACTATTGATAGGCTAATTCGAA  
Scer\_chr15 GTGGATATACGCTGCTATTGCTATCTGGACTATTGATAGGCTAATTCGAA

Scer\_chr11 TTATCAAAGCTTCTTATTTTGGTTTCCCAAAGCTTCCCTACAACATAAC  
Sc11\_Sc11 TTATCAAAGCTTCTTATTTTGGTTTCCCAAAGCTTCCCTACAACATAAC  
Sc15\_Sc11 TTGTTAGAGTATCTTATTTTGGTTTCCCAAAGCTTCCCTACAAGTATGTT  
Scer\_chr15 TTGTTAGAGTATCTTATTTTGGTTTCCCAAAGCTTCCCTACAAGTATGTT

Scer\_chr11 GGGGATGATCATTTCGTTTAAACAGTTAAAACCAGGCAAGGCATGGAG  
Sc11\_Sc11 GGGGATGATCATTTCGTTTAAACAGTTAAAACCAGGCAAGGCATGGAG  
Sc15\_Sc11 GGCAGTGCATCATTTCGAGTACAGTCAAACGACAGTAAGGCATGGAA  
Scer\_chr15 GGCAGTGCATCATTTCGAGTACAGTCAAACGACAGTAAGGCATGGAA

Scer\_chr11 GGCCAAACCTGGGCAATATGTTTTGTTTTGTTTTTACATCCACTGTACT  
Sc11\_Sc11 GGCCAAACCTGGGCAATATGTTTTGTTTTGTTTTTACATCCACTGTACT  
Sc15\_Sc11 AGCCAAACCAAGGACAGTATGTTTTGTTTTGTTTTTACATCCACTGTATT  
Scer\_chr15 AGCCAAACCAAGGACAGTATGTTTTGTTTTGTTTTTACATCCACTGTATT

Scer\_chr11 TCTGGCAGTCACATCCATTACTGTTTTGGATTCAAGCAAGAATGGT  
Sc11\_Sc11 TCTGGCAGTCACATCCATTACTGTTTTGGATTCAAGCAAGAATGGT  
Sc15\_Sc11 TTTGGCAGTCACATCCTTTCACAGTCTTAGATTCAATTATCAAAGATGGT  
Scer\_chr15 TTTGGCAGTCACATCCTTTCACAGTCTTAGATTCAATTATCAAAGATGGT

Scer\_chr11 GAACTGGTTATTATCCTGAAAGAAAAAAGGGAGTAACAAACTTGTCAA  
Sc11\_Sc11 GAACTGGTTATTATCCTGAAAGAAAAAAGGGAGTAACAAACTTGTCAA  
Sc15\_Sc11 GAGCTGACTATTATCCTGAAAGAAAAAAGGGAGTAACAAACTTGTCAA  
Scer\_chr15 GAGCTGACTATTATCCTGAAAGAAAAAAGGGAGTAACAAACTTGTCAA

Scer\_chr11 AAAGTATGTGTGTCGCAATGGAGGTAAGACATCTATGAGACTAGCTATAG  
Sc11\_Sc11 AAAGTATGTGTGTCGCAATGGAGGTAAGACATCTATGAGACTAGCTATAG  
Sc15\_Sc11 AAAGTATGTGTGTCGCAATGGAGGTAAGCATCTATGAGACTAGCTATAG  
Scer\_chr15 AAAGTATGTGTGTCGCAATGGAGGTAAGCATCTATGAGACTAGCTATAG  
Sc15 > Sc11

Scer\_chr11 AAGGTCCATATGGTCTTTCATCTCCGGTCAATAATTACAATAATGTATTG  
Sc11\_Sc11 AAGGTCCATATGGTCTTTCATCTCCGGTCAATAATTACAATAATGTATTG  
Sc15\_Sc11 AAGGTCCATATGGTCTTTCATCTCCGGTCAATAATTACAATAATGTATTG  
Scer\_chr15 AAGGTCCATATGGCTTTCATCTCCAGTCAATAATTATGATAACGCTTTG

Scer\_chr11 TTACTCACTGGAGGTACCGGTTTGCCGGACCTATTGCACATGCAATTAA  
Sc11\_Sc11 TTACTCACTGGAGGTACCGGTTTGCCGGACCTATTGCACATGCAATTAA  
Sc15\_Sc11 TTACTCACTGGAGGTACCGGTTTGCCGGACCTATTGCACATGCAATTAA  
Scer\_chr15 CTACTTACGGAGGTACTGGTTTGCCAGGCGCCATTGCACACGCGATTAA

Scer\_chr11 ACTTGAAA GACGTCAGCGGC TGCTGAAAACAATCTGTAAAATTAGTGA  
Sc11\_Sc11 ACTTGAAA GACGTCAGCGGC TGCTGAAAACAATCTGTAAAATTAGTGA  
Sc15\_Sc11 ACTTGAAA GACGTCAGCGGC TGCTGAAAACAATCTGTAAAATTAGTGA  
Scer\_chr15 ACTTGAAA AACGTCAGCGGC AA CTGAAAACAATTCATAAAAATTAGTGA

Scer\_chr11 TTGCAGTTAGAGG ATTCGACGTACTCGAGGCTTATAAGCCGGAGTTGATG  
Sc11\_Sc11 TTGCAGTTAGAGG ATTCGACGTACTCGAGGCTTATAAGCCGGAGTTGATG  
Sc15\_Sc11 TTGCAGTTAGAGG ATTCGACGTACTCGAGGCTTATAAGCCGGAGTTGATG  
Scer\_chr15 TTGCAGTTAGAGG GTTTA ACGTACTCGAGGCTTACAAGCCGGAGCTGATG

Scer\_chr11 TGT TTAGAAA ATCTGAATGTACAGCTTACATCTACAACACAATGGAAGT  
Sc11\_Sc11 TGT TTAGAAA ATCTGAATGTACAGCTTACATCTACAACACAATGGAAGT  
Sc15\_Sc11 TGT TTAGAAA ATCTGAATGTACAGCTTACATCTACAACACAATGGAAGT  
Scer\_chr15 TGT CTAGAA GATCTTAAATGTACAGCTTACATCTACAATACAATGGAAGT

Scer\_chr11 CCCATCATTAAACCCTAGTGATAGTTTAGATATTTCTCAACAGGATGAGA  
Sc11\_Sc11 CCCATCATTAAACCCTAGTGATAGTTTAGATATTTCTCAACAGGATGAGA  
Sc15\_Sc11 CCCATCATTAAACCCTAGTGATAGTTTAGATATTTCTCAACAGGATGAGA  
Scer\_chr15 TCCGGCATTAACTCTAATGATAGTTTGAAATTTCTCAACAAGACGAGA

Scer\_chr11 AGGCTGATGAAAAAGGCACGTGTGTGGCAACTACTTTAGAAAAGTCTGCC  
Sc11\_Sc11 AGGCTGATGAAAAAGGCACGTGTGTGGCAACTACTTTAGAAAAGTCTGCC  
Sc15\_Sc11 AGGCTGATGAAAAAGGCACGTGTGTGGCAACTACTTTAGAAAAGTCTGCC  
Scer\_chr15 AGGC CGATG GAAAAGGTGTGTGTATGGCAACTACC TAGAACAGTCACT

Scer\_chr11 AATCCACTTGTTTTGATGGTGTGTTTTCCATGCGGGCGACCAAATGT  
Sc11\_Sc11 AATCCACTTGTTTTGATGGTGTGTTTTCCATGCGGGCGACCAAATGT  
Sc15\_Sc11 AATCCACTTGTTTTGATGGTGTGTTTTCCATGCGGGCGACCAAATGT  
Scer\_chr15 AATCCAGTTGAAATTTGATGGTACTGTTTTTCATCATGGAAGACCCAATGT

Scer\_chr11 TAAGGAAC TTCTACATGAAGCGGCTGAATTGAGTGGCTCATTATCTGTGG  
Sc11\_Sc11 TAAGGAAC TTCTACATGAAGCGGCTGAATTGAGTGGCTCATTATCTGTGG  
Sc15\_Sc11 TAAGGAAC TTCTACATGAAGCGGCTGAATTGAGTGGCTCATTATCTGTGG  
Scer\_chr15 TGA AAGCTTCTGCATGAAGTTGTGACC TAAATGGATCGTTAGCTGTGG

Scer\_chr11 TTTGCTGTGGACCTCCTATTTTGTGACAAAGTGAGGAATGAAA.....  
Sc11\_Sc11 TTTGCTGTGGACCTCCTATTTTGTGACAAAGTGAGGAATGAAA.....  
Sc15\_Sc11 TTTGCTGTGGACCTCCTATTTTGTGACAAAGTGAGGAATGAAA.....  
Scer\_chr15 TTTGTTGTGGGCCTCCTGTTTTCGTTGACGAAGTAAGGATCAA.....  
← Scer\_YKL220C  
← Spas\_ScYKL220C  
Spas\_ScYOR381W/YKL220C →  
Scer\_YOR381W →

1-2) SbII/SbIV

Sbay\_YBR030W →  
Spas\_SbyYBR030W →  
 Sbay\_c532     .....GTC**TTT**G**CCAA**GACTGACATTGGCAGGGCGAGGCAATAT-TGAC  
 Sb02\_sb04     .....GTC**TTT**G**CCAA**AGTCCGACATTGCGCAGGGCGAGACAATAT-TGAC  
 Sb04\_sb02     .....GTC**GTTT**---ATG**CTTT**CATT**TT**GTGGT**TTA**CA**CAGCC**T**GTTT**C  
 Sbay\_c611     .....GTC**GTTT**---ATG**ATTT**CATT**CT**GTGGT**TTA**CG**CAACC**G**TTC**  
Spas\_SbYDR011W →  
Sbay\_YDR011W →  
  
 Sbay\_c532     ATT**GAA**-CAAGT**CCT**CA**AATT**-TT**TT**CTG**CGTCC**AA**CA**GCTCCAT**TGC**CAA  
 Sb02\_sb04     GCT**GAA**-TAAGT**CCT**CA**AATT**-TT**CT**CTG**CATCT**AA**CA**GCTCCAT**TGC**CAA  
 Sb04\_sb02     ATT**GAT**G**CCT**G**GCT**T**CT**TGGAC**TTT**TAT**GT**G**GA**AGG**CTT**CTCCAT**TAC**ACT  
 Sbay\_c611     TT**TGAT**G**CCT**G**GTT**T**CT**TGGAC**TTT**TAT**GT**G**GA**AG**CA**CTCCAT**TAC**ACT  
  
 Sbay\_c532     TT**TAT**TATGCGATA**ACG**AT**ATT**G**AC**GGC**CAT**GT**TAG**CGCTAA**AA**CAT**GG**CAT  
 Sb02\_sb04     TT**TGT**TATGCGATA**ACG**AT**ATT**G**AC**GGT**AT**GT**TGG**CGCTAA**AA**CAT**GG**CAT  
 Sb04\_sb02     A**TTTT**G**TT**CA**GA**-----AC**TT**GT**CGG**TATA**AT**GT**CT**GC**AAAA**AA**CC**AG  
 Sbay\_c611     A**TTTT**G**TT**CA**AA**-----AC**TT**GT**CGG**TATA**AT**GT**CT**GC**AAAA**AA**CC**AG  
  
 Sbay\_c532     TT**AT**CT**AC**G**AAA**CC**AC**AGT**TTT**T**AA**GA**AC**AG**CC**AC-----TG**GT**ACT  
 Sb02\_sb04     TT**AT**CT**AC**G**AAA**TC**AC**AGT**TTT**T**CA**GA**AC**ACT**AGT**CAT-----TG**GT**ACT  
 Sb04\_sb02     TC**GT**AT**GC**AAAA**GA**AA**GA**AT**TAA**CTACT**TTA**CC**CA**CC**AG**AT**TGGT**T**CA**  
 Sbay\_c611     TC**GT**AT**GC**AAAA**GA**AA**GA**ACT**GAA**CTACT**TCA**CC**CA**CC**AA**T**TGGT**T**CA**  
  
 Sbay\_c532     C**CT**TT**CT**G**CGA**AC**CA**TCC**GG**AT**CCA**CG**AT**GAT**CA**AG**GG**CGT**CT**G**AA**T**CTA**  
 Sb02\_sb04     C**CT**TT**CT**G**CGA**AC**CA**TCC**GG**TT**CCA**CG**AT**GAT**CA**AG**GG**CGC**CT**G**AA**T**CTA**  
 Sb04\_sb02     A**CGT**G-**TGGG**AG**TAC**AT**GA**AA**CC**AT**TT**TA**GA**AA**AGT**CTACT**GGC**T**ATA**  
 Sbay\_c611     A**CGT**G-**CGGC**AG**TAC**AT**GA**AA**CT**AT**TTT**TA**GA**AA**CT**ACT**GGC**T**ATA**  
  
 Sbay\_c532     C**CG**CC**AA**G**CT**TT**TG**--AG**T**GC**AG**CG**TA**-AA**AA**ACT**TTT**G**AA**GG**G**---  
 Sb02\_sb04     C**CG**CC**AA**G**CT**TT**TG**--AG**T**AC**AA**T**TG**CA-AG**AA**ACT**TTT**G**AA**GG**G**---  
 Sb04\_sb02     T**CA**AA**AA**T**CC**GG**AC**G**CT**AC**CT**CA**GA**T**TGT**GC**ATA**CT**GT**TT**TAT**G**AG**GT**A**  
 Sbay\_c611     T**TAA**AA**AT**CC**GG**AC**GCT**AC**CT**CA**GA**T**TGT**GC**ATA**CT**GT**TT**TAT**G**AG**GT**A**  
  
 Sbay\_c532     -----A**ACC**AG**TT**TC**G**AT**ACT**TT**TAT**-TC**G**AT**GC**TT**TGG**CA**CC**AG**AG**GAT  
 Sb02\_sb04     -----A**ACT**AG**TT**T**G**AT**ACT**TT**TAT**-TC**G**AT**GC**TT**TGG**CA**CC**AG**AG**GAT  
 Sb04\_sb02     G**GT**GAT**ACT**AT**TT**G**AC**AC**ATT**AG**CT**CT**AA**AT**AT**AG**CT**ACT**TT**G**GA**-  
 Sbay\_c611     G**GT**GAT**AG**CT**AT**TT**G**AC**GC**AC**AT**CA**GC**CT**CT**AA**AT**AT**AG**CT**AT**CT**GT**G**GA**-  
  
 Sbay\_c532     G**AA**AT**CA**T**ACA**AG**GG**TT**TG**AA**AT**CG**CC**G**TAG**AT**TT**G**GC**AC**ACA**AT**GG**AA  
 Sb02\_sb04     G**AA**AT**CA**T**ACA**AG**GA**TT**TG**AA**ACC**CG**TAA**AT**CT**G**GC**AC**ACA**ACT**GG**AA  
 Sb04\_sb02     G**AA**ACT**T**G**GG**AT**AT**TT**TG**AT**TTA**C**ATT**--TT**CT**T**CA**AT**AT**CG**T**CG**GA**  
 Sbay\_c611     G**AA**ACT**T**CG**GA**T**AT**TT**TG**AT**CTA**C**ATC**--TT**CT**T**CA**AT**AT**AG**T**CG**GA**  
  
 Sbay\_c532     T**G**AA**GA**AT**T**T**G**GG**CT**G**G**AG**GT**ACC---T**G**---C**AG**AG**TT**CT-T**CC**-----  
 Sb02\_sb04     T**G**AA**GA**AT**T**T**G**AT**T**G**G**AG**GT**ACC---T**G**---C**AG**AA**TT**CT-T**CC**-----  
 Sb04\_sb02     T**GGT**GT**GC**GT**TACT**AC**CT**CT**CCA**CG**TG**AG**AC**AG**TT**CT**CT**CC**TA**AG**C**  
 Sbay\_c611     T**GGT**TT**GC**GT**TACT**AT**CT**CT**CCA**T**GT**G**AG**CA**AA**AG**TT**CT**CT**CC**TA**AG**C**  
  
 Sbay\_c532     ---AG**ATT**G**AC**GG**AA**GC**AG**CG**TG**AA**AG**GAT**TATA**AG**TTG**-A**AG**CT**A**--  
 Sb02\_sb04     ---A**C**ATT**GAT**G**AG**AG**CG**CG**TG**AA**AA**AGAT**TATA**AA**TTG**-A**AG**CT**A**--  
 Sb04\_sb02     C**CT**AA**AT**TT**AT**GT**TAA**AAAA**ATA**AAAA**CATA**AG**GA**AA**AGT**A**AG**CA**AT**G  
 Sbay\_c611     C**CT**AA**AG**TT**TAT**T**ATA**AAAA**AGAT**C**AAAA**C**ATA**AG**GA**AA**AGCA**AAAA**AT**G  
  
 Sbay\_c532     ---G**AA**AG**TT**CA**TT**CG**GT**G**GC**AT**AC**AG**TTAT**-C**G**T**CA**AG**GG**G**TTT**  
 Sb02\_sb04     ---G**AA**AG**TT**CA**TT**CG**GT**G**GC**AT**AC**AG**TTAT**-C**G**T**CA**AG**GG**G**TTT**  
 Sb04\_sb02     A**AG**AG**AA**AG**TTT**CA**GAT**TT**TG**AC**AT**TT**CT**AT**CT**AT**CT**GT**AT**TT**CT**G  
 Sbay\_c611     A**AG**G**AA**AG**TTT**CA**GAT**T**CTA**G**CA**T**TTTAA**TT**AT**--G**T**CC**G**T**AT**--TT  
Spas\_SbYDR011W →  
Sbay\_YDR011W →  
  
 Sbay\_c532     G**AA**AT---C**G**AT**TC**GT**ATC**--AT**G**AA**AC**AG**CG**CT**CG**TG**CC**CAT**TGC**GG**AC**  
 Sb02\_sb04     G**AA**AT---C**G**AT**TC**GT**ATC**--AT**G**AA**AC**AG**CG**CT**AG**T**CCC**CAT**TGC**GG**AC**  
 Sb04\_sb02     G**T**AA**TA**CG**CC**TT**CT**TT**TTT**AT**CA**T**ACA**T**AA**T**AAA**AG**CT**T**G**AA**AT**C  
 Sbay\_c611     C**T**AA**TA**--G**T**TA**TC**TT**TT**AT**TA**CC**ATA**T**ACA**AT--A**AA**AG**CG**T**G**AA**CA**-C

Sbay\_c532 CTTTCAATCACCATGCTACGC AACCTGATT----TGAAGTTT-GTATC-  
Sb02\_sb04 CTGTTCAATCACCATGCTACAAAACCTGATT----TGAAGTTTTGTATC-  
Sb04\_sb02 TTTTGTCTCGCTTTATATAGACCTTCATACAA-TTAAGCAATACACC-  
Sbay\_c611 ACCTCGTTTGTTTTATATAGACGTTCAATAAATCAATAATACATTT

Sbay\_c532 -----GTTGTATGATGTTG---TG-----ACAAAT  
Sb02\_sb04 -----GTTGTATGATGTTG---TG-----ACAAAT  
Sb04\_sb02 -----GATACCACATGATAA---TA-----ATTTTA  
Sbay\_c611 ATAATTGATACCATATGATAAGTTTATCTTGTCTTCACTTCATATTTTG

Sbay\_c532 GTGGC----GAGC----CCGTTATGTGCAAACACTTGATAGCGGAGGAAT  
Sb02\_sb04 GTGGC----GAGC----CTGTTATGTGCAAACACTTGATAGCGGAGGAAT  
Sb04\_sb02 TTACCCTTTGTTC---CTTATTT-TACTGAACTATATCTATTATGAAA  
Sbay\_c611 TTCACCTTCTTCACTTCTTGTTT-TGCTGTACTGTGTTTATTATAAAA

Sbay\_c532 ACC--TG---GAAGCAAAG--GAA---CAAGAGGA---GTATGCGCCT  
Sb02\_sb04 TCC--TG---GAAGCAAAG--GAA---CAAGAGAA---GCATACGCC  
Sb04\_sb02 ACC--TTTTTGAAGCAAATTGAAATTGCTAGAGGC---GGAACCGG--  
Sbay\_c611 GCCAATTTCTTGAACGATTGGAAAGCTCAAGTTGCTAGAGGGAACCGGAA

Sbay\_c532 GCGACAAGTGGTGCAAACACTGCTGCTATTGA--CGATGATTTGA-TTAA  
Sb02\_sb04 GCGACGGGCGGTACAGGTACTGCTACTATTGA--CGATAACTTAA-TCAA  
Sb04\_sb02 GACTCAAGTCATTTATAGGCCAGTATCTATCTATA CGACGGCTTTT-GTAA  
Sbay\_c611 GT-TCAAGCTATTTATAGTCCGGTATCTAT--A--CGATGCTTTTATAT

Sbay\_c532 TAGACTAGAAAAT---AATT--TGGAGGACGCATATTCTAATAAGAGCGC  
Sb02\_sb04 TAGGCTCGAAAAT---AATT--TGGAGGACGCATGCTCTAATAAGAGCGC  
Sb04\_sb02 GACTTCGAGAATTTGAGGTACTCGAGTAGAGCTTTCCTACTTGTTCGC  
Sbay\_c611 GACTTTCGAGAATTTGTAGTACATATTTATAG-TTTCCTTGTTCGC

Sbay\_c532 GGATGACGAAGACGATGATAATG---GAATACAAAACCAGACGAATGCG  
Sb02\_sb04 GGATGACGAAGACGATGATGATGATGGTATACAAAACCAGACGAATGCG  
Sb04\_sb02 ATATGT--TACCTGTTCCATATG---CTTAGCAAAACAGAGTAAATTATC  
Sbay\_c611 ATATGT--TACCTGTTCCATATG---CTTAGCAAAACGGAGTAAATTATC

Sbay\_c532 TTGACTTGGTGC-----TGAAGAACGATGTAAGCCAGGCGCAAGAAATAT  
Sb02\_sb04 TTGACTTGGTGC-----TAAAGAACGATGTAAGCCAGGTCAGGAAATAT  
Sb04\_sb02 TGCGGTGTCAGCC--TTTGGACAAAATTAACCTTGGTTGGACACATTT  
Sbay\_c611 TGCGGTGTCAGTCTTTTGGCCAAAACCTTAAACTTGGTTGGACACAC-T

Sbay\_c532 TCAATTCTATGGCAGCTGTCGA-A-CGTTTTCTATTGGCCAGATAT-  
Sb02\_sb04 TTAATTCAATGGCAGCTGTCGA-A-CGTTTTCTATTGGCCAGATAT-  
Sb04\_sb02 TGGAGTTACAGTGGTTTCTGAGAAGA-GGCGCGCGAATGCGCACAAA--  
Sbay\_c611 TGGGCTACGGCGATTTCTAAGTAGACGGGAGGCGGTGTGCAATAATC

Sbay\_c532 ---GGCTTTACCATACT---GGGAACCTATATGATATTGTTCATCTGGG  
Sb02\_sb04 ---GGCTTTACCATACT---GGGAACCAATATGATATTGTTCACTTGGG  
Sb04\_sb02 ---GTCAGAACTACCCTT---AGGTTGCCAA--AAAGGGACACCAGT  
Sbay\_c611 GAGGTTACCCTACCCTTTTTGCGTTGCCAA--AAAGAAGCACCCAGT

Sbay\_c532 ACCCGACTTTATGGAATCTTTAGGAAAGATGACAAAACCAAGAGAAAG  
Sb02\_sb04 ACCCGATTTTTTGGAAATTTTCAGGAAAGATGACAAAACCAAGAGAAAG  
Sb04\_sb02 GAAAAACTGGCGTCACAAGT-AGTAAAGACCCAACCAACCAGTTTAAA  
Sbay\_c611 GAAAAACTGGCGTCCGCAAAATCGTTAAAGACCCAACCAACCAGATCTGC

Sbay\_c532 TTAAGTGGTGGAGCCAAAGTCGGCCATGTTTGTGTTGTTGCGTGGTACGCC  
Sb02\_sb04 TTAAGTGGTGGAGCCAAAGTCGGCCATGTTTGTGTTTCTGTCATGGTACGCT  
Sb04\_sb02 AGAA----TCCAAATGAGTAGTCGAGTACTGATTAATCCTGGAATGCT  
Sbay\_c611 AGAA----TTC AATATAGTAAATGTTAGTAC----TAATCCTAAAAGCT

Sbay\_c532 A-AAATGCGGTGAGGAAGAGATGAAGATGAAGATGAAGATGAAG  
Sb02\_sb04 C-AAATGCGCCAGGAAGAGATGAAGACGAAACGAAACGAAGCAATCAG  
Sb04\_sb02 T-AGTTGACTAAAGCCATGGGGGGGTTCTGTTACTGTCACTTTTC  
Sbay\_c611 TTAGTTG---GA--ATCATTAT-----TTAAGTTACTATCAGTTTTGG



Sbay\_c532 ATG-----AAGACGAA CAGAAC---GAAGCAGTCAGATGCCCTCGCAC  
Sb02\_sb04 ATGGCTCGCACCAGGAA GTGAACAGTGAATAGAGGAAAGAAAGCGATGAG  
Sb04\_sb02 GGCGCTGTTCCGCTATAGCAGTATTGAAAAATTATTAGCGCTCCGACAC  
Sbay\_c611 ACA-----CCCGCTACAGCAATATTGAGAAAGGAATGTGTCTCCAGCAT

Sbay\_c532 CAGGAAGCGGACAGTGAATGGAGGAAGAAAGCGAGGAGGAGGAAGAGGA  
Sb02\_sb04 GATGAGGATGAGGATGAGGATGAGGATGAGGATGAGGATGAGGACGAGGA  
Sb04\_sb02 AACTA-GTAGAAATAGAAATGGGAAAGTCTGCTTTTATTCA- AAGTGTA  
Sbay\_c611 ATCTA-GGAGGATACAAATAGGAAAGTCCGCTTTTACCAGAA-TATA

Sbay\_c532 GGAAAG-----AGGAGGAAGATGGTTG--AAATCGTGGCTATCCCAACTA  
Sb02\_sb04 TGAGG-----ACGAGGAAGATGTTTG--AAGTCGTGGCTATCCGACTA  
Sb04\_sb02 TATAT-----CGTTTTAAGTATTGTGGTAATTACTTACATTCTTTCC  
Sbay\_c611 TATATTGTACCGTTTCTAGCTATTATAAATAACTGTATAACATTATTTCC

Sbay\_c532 TACATTG--ATTT CAGCGGCGAGCCTTCCCCTTCGACGTGGGCC-CTGGC  
Sb02\_sb04 TACATTG--ATTT CAGCGGCGAGCCTTGCCTTCGACGTGGGCC-CTGGC  
Sb04\_sb02 AATGTTATTATTCTG-GCCTCGAGTTATGTTGCCAGCAGTACT-ACAGC  
Sbay\_c611 AATGTTATCATTCTG-GCCTCGAAATATGTTGTGAGCAGTACAGACCGC

Sbay\_c532 CAACCTGCTAACTTTAACA-ACTGCGCAATGGGACACATTCTTC-----TC  
Sb02\_sb04 CAATCTGCTAACTTTAACA-ACAGCGCAATGGGACACATTCTTT-----TC  
Sb04\_sb02 ---ACTG-TAACTATATCATAGTTCATAATACAGCAGTCGCTACGTAGTC  
Sbay\_c611 ---ACTG-TAGATATAGCA-----T---AA CAAGAATATCGTACGCGCTC

Sbay\_c532 TCAAAAGTCAACTCTCCACATCACCAGCTCTATTATCAACGAGGAAAAAC  
Sb02\_sb04 TCAAAAGGCACTCTCACCATATCACCAGCTCTATCAATCAACGAGGAAAAAT  
Sb04\_sb02 CGACAAAGTAGCCCCCC-CCGCCCCCAATCAAGCTCTGTATTAT  
Sbay\_c611 CAGAAAGTAGTTCC-----AATCCAAGCT-GTA-----

Sbay\_c532 TGCCCTTCTAGC-----CAAGACCGACAA-CTTACACGCCA-AGAAA  
Sb02\_sb04 TGCCCTTCTTAGC-----CAAGACCGACAA-CTTACACGCCA-AGAAA  
Sb04\_sb02 TTTTGTTTTACGTCTCT--CTATACTGCAAGCTTGCGCATTTTACAG  
Sbay\_c611 TCTTTGTTTTACGAGTCTCACTATACTGCAAGCTTGCGCATTTTACAG

Sbay\_c532 ATGCTGTCGAAAGCTGCTAAAGACAAGCAACTGCCCCCTCTAACCGACAG  
Sb02\_sb04 ATACTGTCGAAAGCTACTAAAGACAAGCAACTGCCCACTTTAACCGATAG  
Sb04\_sb02 AATCTTCTAGAACGTTTGAACAA-----TGCTAGTTCGTTCCGTGTGT  
Sbay\_c611 GATCTATCTAGAACGTTTGA-AACAA-----TGCTAATTTGTGCGTGTGT

Sbay\_c532 CAACGCACCAAGGGAGCAGGAGTCACTGACGCCATGCTCCATAACT-CT  
Sb02\_sb04 CCACGCAGTAAAGGAAGCAGGAGTCACTGAGGCCAATGCTCCAGAACT-CT  
Sb04\_sb02 GGAAGTTCTT---GAATCTGC--TTAATGTCAAAACAATT CAGAAATGCT  
Sbay\_c611 AGAAGTTTTT---GAAGCTGC--TTGATACCAAGA-AATTCAGAAACATT

Sbay\_c532 CGGATTTGGTGCAAT--CAGAGCAGAT-ATCTTAGATAGATGCTCAA  
Sb02\_sb04 CGCATCTTGGTGCAAT--CCGAGCAAGAA-ATTTTAGATAGATGCTCAA  
Sb04\_sb02 TGC--CTTAGTACTATTCCATGTATGATGACCATGCATCCATCGCAT  
Sbay\_c611 TGC--CTTAGTGCATTTCTATGTATGAC-----CATGCATCTCAGAT

Sbay\_YBR030W →  
Spas\_SbYBR030W →

Sbay\_c532 AAGACTAACCTAATAGCATT----AAGTATTTCATAGCGTAT-TACTAT  
Sb02\_sb04 AAGACTAACCTAATAGCATT----AAGTATTTCATAGCGTAT-TACTAT  
Sb04\_sb02 ATGCTTTAGCTGCTTGCATTCTT-AAATATACGCCAGCTTTTGTCTAT  
Sbay\_c611 ATGCTTTAGCCAATTGCCTTCCCAATATCGTGCAGTTTCTGTCCCAT

Sbay\_c532 CACGCCACA-CGAGA-GCA--ATAGTGAAAAAAA-----TGAAA  
Sb02\_sb04 CACGCCACA-CGAGG-GCA--ATAGTGAAAAAAA AATGAAAAATGAAA  
Sb04\_sb02 TAAACATCATCGTGTGCACGATATTATCGCACCGA-----CGCAA  
Sbay\_c611 --AACATCA---TGC GGCACGATATCATCGCACCGA-----CGCAA

Sbay\_c532 AAAAA--AT-TTTTTTCATCTGAAAAATATTTAAGCGAAGAGATACCTT  
Sb02\_sb04 AAAAAATGAAA-AA TTTTCGCTGAAAAATATTTAAGCGAAGAGATACCTT  
Sb04\_sb02 TCGTTTTTCATCATTTTTTTTTCAAGCATGATTTAAAAAAATTTTCAT  
Sbay\_c611 TTTTTTTTTT-TTTTTTTTTTCAAGCATAGTTTAAAAAA--TTTCAT

Sbay\_c532 TCACTCTTTT--CTCTTTAGACATTACTACTTACATATGTTTTTCTTTT  
Sb02\_Sb04 TCAAATCTTTT-CTCTTTAGGCATTGCTACTTGGGTTTCTTTTTCTTTT  
Sb04\_Sb02 CCAAATTTTCAACACATCAGTTTTTTAACTGTGTGATGCATTTTTTATC  
Sbay\_c611 CCTAACTTCGAAACAGTTAGTTCGTT-AACTATGTAATGC-TTTTTGATC

Sbay\_c532 TGTAATTGC-----CCAATCAT---CCAAG--ACAATCAT--CGA-  
Sb02\_Sb04 AGAGTTTGC-----TCAATATA---CCAAG--ACAATCAT--CGA-  
Sb04\_Sb02 TGGTTTACTT-ACATACCAATAAATAACCAATTAACAACAACAA-CTAT  
Sbay\_c611 TGGCTCTACTTTACATATCAATAAAAACCTAATAAACAAGCAATTAT

→ Sbay\_YBR031W  
→ Spas\_SbYBR031W/SbYDR012W  
Sbay\_c532 AATGTC CCGTCCACAAGTTACTGTTCACTCCTTGACC GGTGAAGCTACTG  
Sb02\_Sb04 AATGTC CCGTCCACAAGTTACTGTTCACTCCTTGACC GGTGAAGCTGCTG  
Sb04\_Sb02 AATGTC TCGTCCACAAGTTACTGTTCACTCCTTGACC GGTGAAGCTACTG  
Sbay\_c611 AATGTC TCGTCCACAAGTTACTGTTCACTCCTTGACC GGTGAAGCTACTG  
→ Spas\_SbYDR012W/SbYBR031W  
→ Sbay\_ORF(not annotated)

Sbay\_c532 CCAATGCCTTGCCATTGCCAGCTGTCTTCTCCGCTCCTATCCGTCCAGAC  
Sb02\_Sb04 CCAATGCCTTGCCATTGCCAGCTGTCTTCTCCGCTCCTATCCGTCCAGAC  
Sb04\_Sb02 CCAATGCTTTGCCATTGCCAGCCGTCTTCTCCGCTCCTATCCGTCCAGAC  
Sbay\_c611 CCAATGCTTTGCCATTGCCAGCCGTCTTCTCCGCTCCTATCCGTCCAGAC

Sbay\_c532 ATTGTCCACACTGTTTTACCTCTGTGAACAAGAACAAGAGACAAGCTTA  
Sb02\_Sb04 ATTGTCCACACTGTTTTACCTCTGTGAACAAGAACAAGAGACAAGCTTA  
Sb04\_Sb02 ATTGTCCACACTGTTTTACCTCTGTGAACAAGAACAAGAGACAAGCTTA  
Sbay\_c611 ATTGTCCACACTGTTTTACCTCTGTGAACAAGAACAAGAGACAAGCTTA

Sbay\_c532 CGCTGTTTCTGAAAAGCTGGTCACCAAACCTCTGCTGAATCCTGGGGTA  
Sb02\_Sb04 CGCTGTTTCTGAAAAGCCGGTCACCAAACCTCTGCTGAATCCTGGGGTA  
Sb04\_Sb02 CGCTGTTTCTGAAAAGCCGGTCACCAAACCTCTGCTGAATCCTGGGGTA  
Sbay\_c611 CGCTGTTTCTGAAAAGCCGGTCACCAAACCTCTGCTGAATCCTGGGGTA

Sbay\_c532 CCGGTCGTGCTGTCGCCCGTATTCCAAGAGTTGGTGGTGGTACC GGT  
Sb02\_Sb04 CTGGTCGTGCTGTCGCCCGTATTCCAAGAGTTGGTGGTGGTACC GGT  
Sb04\_Sb02 CTGGTCGTGCTGTCGCCCGTATTCCAAGAGTTGGTGGTGGTACC GGT  
Sbay\_c611 CCGGTCGTGCTGTCGCCCGTATTCCAAGAGTTGGTGGTGGTACC GGT

Sbay\_c532 AGATCCGGTCAAGGTGCTTTCGGTAACATGTGTCGTGGTGGTTCGTATGTT  
Sb02\_Sb04 AGATCCGGTCAAGGTGCTTTCGGTAACATGTGTCGTGGTGGTTCGTATGTT  
Sb04\_Sb02 AGATCCGGTCAAGGTGCTTTCGGTAACATGTGTCGTGGTGGTTCGTATGTT  
Sbay\_c611 AGATCCGGTCAAGGTGCTTTCGGTAACATGTGTCGTGGTGGTTCGTATGTT

Sbay\_c532 CGCTCCAACTAAGACCTGGAGAAAGTGGAACTTAAGGTTAACCACAACG  
Sb02\_Sb04 CGCTCCAACTAAGACCTGGAGAAAGTGGAACTTAAGGTTAACCACAACG  
Sb04\_Sb02 CGCTCCAACTAAGACCTGGAGAAAGTGGAACTTAAGGTTAACCACAACG  
Sbay\_c611 CGCTCCAACCAAGACCTGGAGAAAGTGGAACTTAAGGTTAACCACAACG

Sbay\_c532 AAAAGCGTTACGCCACTGCTTCTGCTATTGCTGCTACTGCTGTTGCCTCT  
Sb02\_Sb04 AAAAGCGTTACGCCACTGCTTCTGCTATTGCTGCTACTGCTGTTGCCTCT  
Sb04\_Sb02 AAAAGCGTTACGCCACTGCTTCTGCTATTGCTGCTACTGCTGTTGCCTCT  
Sbay\_c611 AAAAGCGTTACGCCACTGCTTCTGCTATTGCTGCTACTGCTGTTGCCTCT

Sbay\_c532 TTGGTCTTGGCCAGAGGTCACAGAGTCGAAAAGATTCCAGAAATCCATT  
Sb02\_Sb04 TTGGTCTTGGCCAGAGGTCACAGAGTCGAAAAGATTCCAGAAATCCATT  
Sb04\_Sb02 TTGGTCTTGGCCAGAGGTCACAGAGTCGAAAAGATTCCAGAAATCCATT  
Sbay\_c611 TTGGTCTTGGCCAGAGGTCACAGAGTCGAAAAGATTCCAGAAATCCATT

Sbay\_c532 GGTGTTTTCCACCGATTTGGAATCCGTCCAAAAGACTAAGGAAGCTATTG  
Sb02\_Sb04 GGTGTTTTCTCCGATTTGGAATCCGTCCAAAAGACTAAGGATGCCATTG  
Sb04\_Sb02 GGTGTTTTCTCCGATTTGGAATCCGTCCAAAAGACTAAGGATGCCATTG  
Sbay\_c611 GGTGTTTTCCACCGATTTGGAATCCGTCCAAAAGACTAAGGAAGCTATTG

Sbay\_c532 CTGCTTTGAAGGCTGTTGGTGCCTCACTCCGACTTGTGGAAGGCTTTGAAG  
Sb02\_Sb04 CTGCTTTGAAGGCTGTTGGTGCCTCACTCCGACTTGTGGAAGGCTTTGAAG  
Sb04\_Sb02 CTGCTTTGAAGGCTGTTGGTGCCTCACTCCGACTTGTGGAAGGCTTTGAAG  
Sbay\_c611 CTGCTTTGAAGGCTGTTGGTGCCTCACTCCGACTTGTGGAAGGCTTTGAAG

Sbay\_c532 TCCAAGAAATTGAGAGCCGGTAAGGGTAAGTACAGAAACAGAAGATGGAC  
Sb02\_sb04 TCCAAGAAATTGAGAGCTGGTCAAGGTAAGTACAGAAACAGAAGATGGAC  
Sb04\_sb02 TCCAAGAAATTGAGAGCTGGTCAAGGTAAGTACAGAAACAGAAGATGGAC  
Sbay\_c611 TCCAAGAAATTGAGAGCCGGTAAGGGTAAGTACAGAAACAGAAGATGGAC

Sbay\_c532 TCAAAGAAGAGGTCCATTAGTCGTCTACGCTGAAGACAACGGTATTGTCA  
Sb02\_sb04 TCAAAGAAGAGGTCCATTAGTCGTCTACGCTGAAGACAACGGTATTGTCA  
Sb04\_sb02 TCAAAGAAGAGGTCCATTAGTCGTCTACGCTGAAGACAACGGTATTGTCA  
Sbay\_c611 TCAAAGAAGAGGTCCATTAGTCGTCTACGCTGAAGACAACGGTATTGTCA

Sbay\_c532 AGGCTTTGAGAAACGTTCCAGGTGTCGAAACCTCTAACGTTGCCTCTTTG  
Sb02\_sb04 AGGCTTTGAGAAACGTTCCAGGTGTCGAAACCTCTAACGTTGCCTCTTTG  
Sb04\_sb02 AGGCTTTGAGAAACGTTCCAGGTGTCGAAACCTCTAACGTTGCCTCTTTG  
Sbay\_c611 AGGCTTTGAGAAACGTTCCAGGTGTCGAAACCTCTAACGTTGCCTCTTTG

Sbay\_c532 AACTTGTGCAATTGGCTCCAGGTGCTCACTTGGGTAGATTTCGTCATCTG  
Sb02\_sb04 AACTTGTGCAATTGGCTCCAGGTGCTCACTTGGGTAGATTTCGTCATCTG  
Sb04\_sb02 AACTTGTGCAATTGGCTCCAGGTGCTCACTTGGGTAGATTTCGTCATCTG  
Sbay\_c611 AACTTGTGCAATTGGCTCCAGGTGCTCACTTGGGTAGATTTCGTCATCTG

Sbay\_c532 GACTGAAGCTGCCTTCTCCAAGTTGGACCAAGTCTGGGGTCCGAAACCG  
Sb02\_sb04 GACTGAAGCTGCCTTCTCCAAGTTGGACCAAGTCTGGGGTCCGAAACCG  
Sb04\_sb02 GACTGAAGCTGCCTTCTCCAAGTTGGACCAAGTCTGGGGTCCGAAACCG  
Sbay\_c611 GACTGAAGCTGCCTTCTCCAAGTTGGACCAAGTCTGGGGTCCGAAACCG

Sbay\_c532 TTGCCTCTTCCAAGTTCGGTTACACTTTGCCATCCCACATCATTTCCACT  
Sb02\_sb04 TTGCCTCTTCCAAGTTCGGTTACACTTTGCCATCCCACATCATTTCCACT  
Sb04\_sb02 TTGCCTCTTCCAAGTTCGGTTACACTTTGCCATCCCACATCATTTCCACT  
Sbay\_c611 TTGCCTCTTCCAAGTTCGGTTACACTTTGCCATCCCACATCATTTCCACT

Sbay\_c532 TCCGATGTACCAGAATCATCAACTCTTCTGAAATCCAATCTGCTGTTAG  
Sb02\_sb04 TCCGATGTACCAGAATCATCAACTCTTCTGAAATCCAATCTGCTGTTAG  
Sb04\_sb02 TCCGATGTACCAGAATCATCAACTCTTCTGAAATCCAATCTGCTGTTAG  
Sbay\_c611 TCCGATGTACCAGAATCATCAACTCTTCTGAAATCCAATCTGCTGTTAG

Sbay\_c532 ACCAGCTGGCCAAGTACTCAAAGCGTACCCACGTTTTGAAGAAGAAC  
Sb02\_sb04 ACCAGCTGGTCAAGTACTCAAAGCGTACCCACGTTTTGAAGAAGAAC  
Sb04\_sb02 ACCAGCTGGTCAAGTACTCAAAGCGTACCCACGTTTTGAAGAAGAAC  
Sbay\_c611 ACCAGCTGGCCAAGTACTCAAAGCGTACCCACGTTTTGAAGAAGAAC

Sbay\_c532 CATTGAAGAACAAGCAAATCTTGTGAGAATGAACCTTACGCCAAGGTT  
Sb02\_sb04 CATTGAAGAACAAGCAAATCTTGTGAGAATGAACCTTACGCCAAGGTT  
Sb04\_sb02 CATTGAAGAACAAGCAAATCTTGTGAGAATGAACCTTACGCCAAGGTT  
Sbay\_c611 CATTGAAGAACAAGCAAATCTTGTGAGAATGAACCTTACGCCAAGGTT

Sbay\_c532 TTTGCTGCTGAAAAGCTAGGTTCCAAGAAGGTCGAAAAGACTGGTGTCAA  
Sb02\_sb04 TTTGCTGCTGAAAAGCTAGGTTCCAAGAAGGTCGAAAAGACTGGTGTCAA  
Sb04\_sb02 TTTGCTGCTGAAAAGCTAGGTTCCAAGAAGGTCGAAAAGACTGGTGTCAA  
Sbay\_c611 TTTGCTGCTGAAAAGCTAGGTTCCAAGAAGGTCGAAAAGACTGGTGTCAA

Sbay\_c532 Sbay\_YBR031W →  
Sb02\_sb04 Spas\_SbYBR031W/SbYDR012W →  
Sb04\_sb02 GCCAGCTGCTGTCTTCACTGAAACTTTGAAGCACGATTAAGCTTTGATATT  
Sbay\_c611 ACCAGCTGCTGTCTTCACTGAAACTTTGAAGCACGATTAAGCTTTGATATT  
GCCAGCTGCTGTCTTCACTGAAACTTTGAAGCACGATTAAGCTTTGATATT  
GCCAGCTACCGTCTTCACTGAAACTTTGAAGCACGATTAAGCTTTGATATT  
Sbay\_ORF(not annotated) →

Sbay\_c532 A--TAGAAATTTAATTATAATCTAAATATCTTTTATAA--AACTTTTAAATC  
Sb02\_sb04 A--TAGAAATTTAATTATGAACATAATATCTTTTATA--AACTTTCAATC  
Sb04\_sb02 ACGTATGAATATCTTAGTTACTTCTATATACTG-ACACACACTTCTAAGT  
Sbay\_c611 ACGTATGAATATCTTAGTTACTTCTATATACTG-ACAAATACTTTTAAAGC

Sbay\_c532 AAACCTCCAAATTTTAT---TGAAGTGTAT----CTTTT--GTATCAT  
Sb02\_sb04 AAACCTCCAAATTTTATTTTACATGAAGTGCAT----CTTTTGTATATT  
Sb04\_sb02 CA--TTAAAGTAGTACTCC--ATAAAGTTGAG----CACCCTGCCAAGGT  
Sbay\_c611 CA--TTAAAGGAGTACACC--ATGAAGTGTATGACCCGCTGCCAAGGT



Sbay\_c532 TAT-GGCGTGGAAATAATAACGGCCTAGACTTGATGAATAGCATAGCCTTT  
Sb02\_Sb04 TAT-GGCTTGGAAATAATAACGGCCTAGACTTGATGAATAGCATAGCCTTT  
Sb04\_Sb02 AATTGGCGTGAACTAGGAGGAATTGTAACCA--GATAGTAGAAAGATC  
Sbay\_c611 AATTGGCATGAAACCGCCAGGAATTGTAATCT--GATAGTAAAAAGATC

Sbay\_c532 AGTCAGCAGGATACAAATGATCTTCCATCAAGAACAG-GAATATTGGA  
Sb02\_Sb04 AGTCAGCAGGATACAAATGACCTTCTCATCAAGAGCAA-GAGTATCTAA  
Sb04\_Sb02 ACCAAGCAAAGGAGAGAGGCTTCTCGCGCTTGTGACCAATGTAGAAAGAA  
Sbay\_c611 ACGAAGCAAAGGAGAGAGGCTTCTCGCGCTTGTGACCAATGTAGAAAGAA

Sbay\_c532 AAGAATACTCGGATTTGATCACTGATCTGAAAAGTGGTGATCTCGCTGAT  
Sb02\_Sb04 AAGAATACTCGGATTTGATCACTGAGCTGAAAAGTGGTGATCTGGCTGAT  
Sb04\_Sb02 AAGAAT---CAAATGCGAATACA-ATCAACATACCAGAGTT-----TGCC  
Sbay\_c611 AAGAAT---CAAATGCGAATACA-ATCAACATACCAGAGTT-----TGCC

Sbay\_c532 ATCGATTTATCTGGCTCCTTGGTACCCTCCAAGTGATGTTTTATTGACGT  
Sb02\_Sb04 ATCGATTTCTCTGGCTCCTTGGTACCCTCCAGTGATGTTTTATTGACGT  
Sb04\_Sb02 AGGGGT-----GCTTGGAGGTAGGTC-----AGTTTGCCCTTTGT  
Sbay\_c611 AGGGGT-----GCTTAGAGGTGCGCG-----AGTTCTGTCTGTTTGT

Sbay\_c532 CAGAGTCTCAAAGACGCTGGTGAAATCCAAACCGAATACGGTGTATCA  
Sb02\_Sb04 CAGAGTCTCAAAGACGCTGGCGAAATCCAAACCGAATATGGTGTGTCA  
Sb04\_Sb02 CAGAGTTC-CACTGAAACGTGGCCCAACCAAAAATAAAC-----T-CA  
Sbay\_c611 CAGAGTTC-CACTGAAACGTGGTCCACGAAAATAAGGAC-----TCCA

Sbay\_c532 ACCTAATCAAAGATTCTCAATTTTCGTAAGGCAATCTGATGTAG.....  
Sb02\_Sb04 ACCTAATCAAAGATTCTCAATTTTCGTAAGGCAATCTGATGTAG.....  
Sb04\_Sb02 GGAAATTGCAAG--TGACAAGATGAGCTCCGTAATAACCTTCTT.....  
Sbay\_c611 GGG-ACGACAAG--TGACAAAATGAGCTCGGAGAAATAGTCTTTT.....  
Sbay\_YDR013W→  
Spas\_SbYDR013W→  
Spas\_SbYBR033W→  
Sbay\_YBR033W→

1-3-a) SbVIII > SbXV

```

      ←Sbay_YHR013C
Sbay_c668 .....TCATCTGCGTGATCACAATCTAAAGTCGTAGTTGTAGCAACAAAG
Sb08_sb15 .....TCATCTGCGCCATCACAATCTAAAGTCGTAGTTGTAGCAACAAAG
      ←Spas_SbYHR013C

Sbay_c668 GAGTTTCTGGCCAAGAAAGAATATGATACATATAATATTTTCATCATATA
Sb08_sb15 GAGTTTCTGGCCAAGAAAGAATATGATACATATAATATTTTCATCATATA

      Sbay_YHR013C ←
Sbay_c668 ATTCTCGGGCAGGTTATGAAGGTTGGCATTTCATACAAATAATGTCAT
Sb08_sb15 ATTCTCGGGCAGGTTATGAAGGTTGGCATTTCATACAAATAATGTCAT
      Spas_SbYHR013C ←

Sbay_c668 TGATTGTCGCTCTACGAATATTGATTGGCATAATCAGAGTAGTTCTATAT
Sb08_sb15 TGATTGTCGCTCTGCGAATGTTGATCGGCATAATCAGAGTAGTTCTATAT

Sbay_c668 CGAGTTTAATGTTCTGCTTTTCTCTTTAGTTGACAAATTATGCATTCTGAA
Sb08_sb15 CGAGTTTAATGTTTGTCTTTTCTGTTTCGTTGACACTTATGCATTATGAA

Sbay_c668 CTAGGTCAAGTTAAGACATTTAGAACCCTTCAAATTCGCTTTCTTTTTTT
Sb08_sb15 CTGGTCAATGTTAAGACGATTGGAACCCTTCAAATTCGTTT-TTTTTTT

Sbay_c668 TTTCTTGCTTCGTAATAATCGACGCGAGAAAGTGATTACTGAAC TGATA
Sb08_sb15 TTTCTTCTTCGTAATAATCGACGCGAGAAAGTGATTACTGAAC TAGATA

Sbay_c668 TAGAAAAGGGAATTTACAATGAGAATAGTATAGAACAGTCGTTTGGAAA
Sb08_sb15 TAGAAAAGGGAATTTACGACTGAGAATAATACAGAACAGTCGTTTGGGAG

Sbay_c668 ATGCACTCTTCTATGCGGTTTCCATTAGGAGCCGGAAGAGATTTTAGTTA
Sb08_sb15 AGCACTCTTCTGTCAAGTTTCCGTTAGGAGCCGAGACACTTTTAGTTG

Sbay_c668 CTCAAATGCTGCAAGGCCCGTTCTTCTACGAAAAAGCGTATTTACTAC
Sb08_sb15 TTCGAACACTTGAAAGGCCCGTTCTTCTACGAAAAAGCGTATTTAGTAT

Sbay_c668 ATATACCGTTATGATAGCGTTATCTTGGTAACTCCAATATCTTATGCAC
Sb08_sb15 ATATATAGTTATGATAGCGTCATATTGGTAACTCCAATAATCATCATGCAC

Sbay_c668 TACAACTCCTGC--ACTTGCAGGTTATGAGCCGTTTTCTCTTACCGCA
Sb08_sb15 CACTGCTCCTGCCTACTACAGGTTGTAATACTCGTTTTCCCTTGCCACA

Sbay_c668 TCTCTCTTTTAAAGAGATATGCAAGATTTTATGTTTGTATTTGTTCCACCC
Sb08_sb15 TCGCCTTTTATGC----TTGAGATTTTTTATTTGCGTTTGTTCACCC

Sbay_c668 TCTTCGCATGAGTAGTTGATAGCTTCGCACGGGAGTTAGTTACACTACTA
Sb08_sb15 TCTTCGCATGCCTAGCTGATAGCTTCGCACGGAAGTTAACTAGACAGCTA

Sbay_c668 TATATTAGAAAATAGCCCGGATTGAAAGAAGACGTGCTAAAGGTTAAG
Sb08_sb15 TATATTGAAAATAGCCCGGATTAAAAGAAGATTCGCTAAAGGTTGAAG

Sbay_c668 AAGAGATCATTAATACGGTAGGAAGATACAGAACAACCTCGTGACTGAGCC
Sb08_sb15 AATA--TCACTAATACAACAGAAGATATAGAACAACCTCGTGACTGAGCT

      →Sbay_YHR014W
Sbay_c668 GAGACTAAACATGGCCCCAAAAAAGCGCTTTAGACCACTAGAAATAGGGT
Sb08_sb15 AAGACTGAACATGGCCCCAAAAAAGCGCTTCAGACCACTAGAAATAGGGT
      →Spas_SbYHR014W

Sbay_c668 CACCGATACATTTCTAAAAGGAAAGTTCAAAAACCACTTCAGAGAAAGACT
Sb08_sb15 CACCGAACATTTCTAAAAGGAAAGTTCAAAAACCACTTCAGGAGAAACT

```

Sbay\_c668 ACAAACCTGCGAGTTCTCCACTTGCCCTTCTAAGATTGATAAGGATAT  
Sb08\_sb15 ACAAACCTGAGAGTTTCGCATTTGCCCTCTCTAGAATTGATAAGATGC

Sbay\_c668 TAAGGGCAAAGAGTCCGCTAAGGTTGAGAAAACGAGAAAGGTGATTCGG  
Sb08\_sb15 TAAGAGTAAAGAGTCCGCTAAGGTTGAGAAAACGAGAAAGGTGATCTCAG

Sbay\_c668 AGAACATATTC AATTCGAAACACGTTGATTTAAGGCTGGAGACTCCACGC  
Sb08\_sb15 AAACATATTTAATTCAAAACACGTTGATTTAAGGCTGGAGACTCCTCGC

Sbay\_c668 CAGGGTTTGAAATTTGTTAGTGAATCTCAAAATGGTTCAAAGCTCCAGA  
Sb08\_sb15 CCGGCTTGAAATTTGTTAGCGACCCTCAAAAGGGTTCAAAGCTCCAGA

Sbay\_c668 CTCCGATATCTAAAAATAAATCCAGTCATGCCCTGAAAGATGAAAGGC  
Sb08\_sb15 TGTCCGATATCTAAAAATAAATCCAGTCATGCCCTGAAAGATGAAAGGC

Sbay\_c668 AAGCAATAGAGTCGCCCTCCTTTGATAAATCATTAAAGTTTGAGGACATA  
Sb08\_sb15 AAGCAATAGTGTGCCCTCCTTTGATAAATCATTGAAGTTTGAGGACATA

Sbay\_c668 GAGCAGCCTCCAAAATCCACTTCAACACCGGTTTCGCTCAACCTCTCA  
Sb08\_sb15 GAGCAGCCTCCAAAATCCACTTCAACACCGGTTTCGCTCAGCCTCTCA

Sbay\_c668 AATAAGCGTAGAAAGAGAGCCACCATGTTTCCGCTCCCGTATTATATTG  
Sb08\_sb15 AATAAGAGTAGAAAGAGAACCATCCATGTTTCCGCTCCCGTATTATATTG

Sbay\_c668 CTCCTCGCCCATGTATAAATTCAACCCGTATCAGAAATTTACAGGGAAC  
Sb08\_sb15 CTCCTCGCCCATGTATAAATTCAACCCGTATCAAATTTTACAGGGAAC

Sbay\_c668 CCTATATTTCTGGCACCGTGCTATAATCCAAGTTTGAACTATGCCGTFCCC  
Sb08\_sb15 CCTGTATTTCTGACACCGTGCTATAATCCAAGTTGTGAATATATGCAATCCC

Sbay\_c668 AGCTCAACAACCGGAATTGCTTTATCCGAATGTTAACGTGTATGATTCAC  
Sb08\_sb15 CGTTCACAACAACCGGAATTGCTTTATCCAATGTTAACGTGTACGATTCAC

Sbay\_c668 CATTGTTTGACAAAGCAAGGCTCACACACCAAATTAATTAACCCAGACAGC  
Sb08\_sb15 CATTGTTTGACAAAGTAAGGCACCCACACCAAATTAATGACCCAGATAGC

Sbay\_c668 CTGAATAGAGAACAATCACTTGAATACCTTCCAATATACTCTGTCTCGAT  
Sb08\_sb15 TTGAATAGAGAACAACATTAACGAATACCGTCCAATATTTCTATCTCGAT

Sbay\_c668 TTCTAACAAACGGGGATTTTGTGGTCAAGAGACACCTAGAATAGCACAA  
Sb08\_sb15 TTCTAACAAACGGGGATTTTGTGGGCAAGAGACACCTAGAATAGCATCAA

Sbay\_c668 AGCCAAGCAAG AAGAGACTCTCAAACCTCCAAGATGTTGATTATTTCTGAT  
Sb08\_sb15 AGCCAAGCAATAAGAGATTCTCAAACCTCTCAAGATGTTGATTATTTCTGAT

Sbay\_c668 TATGAATCGAGCGGACAGAAACGCAACCTATCATGATAGCAAATCTCCTCT  
Sb08\_sb15 TATGAATCGAGCGGACAGAAATGCAACCTATCATGATAGCAAATCTCCTCT

Sbay\_YHR014W →  
Sbay\_c668 TGGTTAGGTTCCAGGTATATTTGTATTACGTTAGTTAAAAATAATATAA  
Sb08\_sb15 TGATTAGACTTCAAGTCGTCCTTTGTAT-ACGTTAGTTAAAAATACTATAA  
Spas\_SbYHR014W →

Sbay\_c668 TAAAAAATAAAGTTGATAGTTAGCAAATGGCTTTTCTCATT ---  
Sb08\_sb15 TCTAAAAAATAA-TTAATAGTTGGCAACTAACTTTCTACATTGT

Sbay\_c668 ATATATCAAAGCGCAAAAAATAACGACAACCTGCAGGATTTGAACCTGCGC  
Sb08\_sb15 ATATATCAAAGCGCAAAAAA--ACGACAACCTGCAGGATTTGAACCTGCGC

Sbay\_c668 GGGCAGAGCCCAAAGATTCTAATCTTTGCGCTTAACCACTCGGCCAAG  
Sb08\_sb15 GGGCAGAGCCCAAAGATTCTAATCTTTGCGCTTAACCACTCGGCCAAG

Sbay\_c668 TTGCCTTGTGTTATATATAAATTAAATAGC--AATAATAATATAAAAT  
Sb08\_sb15 TTGCCTT-GTTAATATATAATTTATATAGTGAAACAGTAATAAATCTTTAT

Sbay\_c668 AC-----CTGAAC-----  
Sb08\_sb15 ACTTAGTTTCAGTATGAACCTCAACCTTTTTCCGTTTGTGAAAAGTGAAA

Sbay\_c668 -----TTAGTAACT-----C-----  
Sb08\_sb15 TGTACGTTGATATTTAGTAACTTTAGTAAGTAGTAGTAATCAAGAATAAG

Sbay\_c668 -----ATC-----  
Sb08\_sb15 CACTTCTTTCTTATTATATATGAGAGGTTTATAAAATGCACGCTGATTGG

Sbay\_c668 -----  
Sb08\_sb15 TAATTTGAAACCCAGTGGTTCAAACATAATTCGGAATATGGACAATAAGA

Sbay\_c668 -----CACCCCCTT-----  
Sb08\_sb15 TATCATGTATAACTCATCCCCCTTATACATGCTAATTTCTGTTCCAGTTAAT

Sbay\_c668 -----TTCTG-----CGTCT-----  
Sb08\_sb15 AGATCTTTCTGTTTGAACAAGATTCAACCACTGTCATCTATTACTATTA

Sbay\_c668 -----  
Sb08\_sb15 TATACGGTGTTAAAAGATGACATAAACTACAAGACCAGTAAGTTAAGAAT

Sbay\_c668 -----GTCGAAA-----  
Sb08\_sb15 CAAAGTGTCGTCGAAAATAATGGAAGCTGAAGCGCAAGGATTAATATTGC

Sbay\_c668 -----GTCGAA-----ATATCAAA  
Sb08\_sb15 AGTAGATGGACGATAGTAGAACTCTTGTCCAGCAGATTGGTTATATGAAA

Sbay\_c668 TCC--T--CA--A-----TTGACGAC-----TGAGCTCA  
Sb08\_sb15 TCCAGTGGTTCAAGGAATAATTCGGAACATTTGATGATAAGTTATCAGGTAT

Sbay\_c668 AACCTGT-----ATAGA-----T  
Sb08\_sb15 AACCTATGTCCCTTCTATACTAATATCTGATCGATTAATAGATCTTTATCT

Sbay\_c668 -----  
Sb08\_sb15 TATCATTGACGTAATCCTAGAATTAGAATTTACCTATTCCAATAAAGCA

Sbay\_c668 -----TGATGTT--GCAAGAA  
Sb08\_sb15 TTAAATCCCTAATTGAATTCACCTTTTTTTTATATATATAGCAAATA

Sbay\_c668 TTAGACTTGAGTTGCTAGAACAGTTGCTTTTCATATTCATCGTTTGTGTTT  
Sb08\_sb15 TGAGCCTCACTTGCTTACAATAATTT-TTTGATAATAACTGTTTGTGTTT

Sbay\_c668 CGTGAGCCACTTGATGGCACCGGATTTTTAAATTTAGTTCTAATCTGA  
Sb08\_sb15 TTTGAGCTACTCAAAGGCTATGAATATTT--AATTTAGTTTCAACCTTA

Sbay\_c668 AGTTTTA-AGGAAGAAAACAAAAAACAACAAATGCCGTTCCAATGA  
Sb08\_sb15 AGTTTTGTAAAAGAAAAACAAAAAACAACAAAGGCCGTTCCAGATAA

Sbay\_c668 GGCCTAGTTGTTTGTATGTATCTA-----  
Sb08\_sb15 GGCCAAATTTTTTAAATATATATAAAGAGGTAATAACGCACCGTTGAG

Sbay\_c668 -----  
Sb08\_sb15 ATCGAGATGGCAGTAAGGACACAACAGGAGACTTCAGAGAAACATAACAT



Sbay\_c668 -----TCTAT--AA---GAGGTGCTTAATTCAGGCCA  
Sb08\_sb15 AATATGATCGCAACGCTTTCATGAAAAGGCGCTTAGTTCGGTTG

Sbay\_c668 GCCATGTGTACG--AGAGCTACGTCTTTAAAGAA----ATTTTGT---  
Sb08\_sb15 TGCCATATGTTTCGGAGAGTCACGTCTTTAAAGAAATAATTTGATGAA

Sbay\_c668 -----  
Sb08\_sb15 ACGTTGATAAGTAAATCGCAAGAACATCTCAGCCTATGTTCCCCCAGAT

Sbay\_c668 ----CCTC-----ACCTAACTA-----  
Sb08\_sb15 AAAACCTCGAGTTGTTTTCGGTTACCCAAAATAACCCGACGAAAAGAAAT

Sbay\_c668 -----TGTTGATGGC--TTATGACACTCAAGTTGAT  
Sb08\_sb15 GTTATTCTTTTTATTCTCATGTTGTATCTTATGCGCTTAAGTTGAT

Sbay\_c668 TAATCAGCCTTCTAGAAATCCAGCTCAGTAGAGGCCGCTTTTTTCAAGC  
Sb08\_sb15 TAATCAGTCTTTTAGAAGCCTATTTTATGCGGGCCGCTTTTTTCAAGG

Sbay\_c668 CTTGCGCGGCTGAGTTTTTCAAGGGGCAGTA-TTTTGTGAAAAGTGAAC  
Sb08\_sb15 CTTACGCGGCTGAGTTTTTCAAGGGGCAGTACTTTGTATCAAAGTGAATC

Sbay\_c668 TCCTATTATTAGTAGTG---ATTTGCTGCAAT-ACGGGCTCATAGACC  
Sb08\_sb15 TCCTATTATTAGTGTAGCACTTTGATCTGTAAACATAGGCTCATAGATC

Sbay\_c668 CTTCCATGTTTGACGCTCTAATATTTCACTGCTATACCACACTAGAAAT  
Sb08\_sb15 CTC-----AATATTTCACTGCTATACCACACTAGAA-----

Sbay\_c668 AAGAAGGCCGAAACTAAATAATTTCTTGCAATAGGGGCTTTTCGCTGATTT  
Sb08\_sb15 AAAAGCTTCAGGACTAACGGTTTCTTGCAATAGGGGCTTTTCGCTGATTT

Sbay\_c668 TTTTTTTTTTTATTTTCACTGCTATCAATTACGCGCCACCAAGCAGA  
Sb08\_sb15 ACCTTCCCT---ATTTCACTGCTATTAATTACGCGCCGCAAGCAGA

Sbay\_c668 CCAACATCAGGTATTATGGTTTATGTTGCCGAAAATGACTTACAGA  
Sb08\_sb15 CCAACATCAAGCTATTATGGTTTATGATTGTCCAGAAATGACTTAAAGA  
→ Sbay\_YOR019W  
→ Spas\_sbYOR019W

Sbay\_c668 CCTGTACAGAAACCTTACCTTCAAAGTGCGCAAATAAATCAGAGGCA  
Sb08\_sb15 CCTGTACAGAAACCTTACCTTCAAAGTGCGCAAATAAATCAGAGGCA

Sbay\_c668 ACAAATAGACAGAA-----ACAGTCAAAATAAAATGATATCTTCCA  
Sb08\_sb15 ACAAATAGACAGAACTTGCAGAAACAGTCAAAATAAAATGATATCTTCCA

Sbay\_c668 GCCTTCAGTTGCATTAACACTGTCCCTTTGACTCTAGGTTATTCTTCAA  
Sb08\_sb15 GCCTTCAGTTGCATTAACACTGTCCCTTTGACTCTAGGTTATTCTTCAA

Sbay\_c668 TACACGACAGTAGAGAAGGATTTCTGGCGTACCTGTTCCATGATTAC  
Sb08\_sb15 TACACGACAGTAGAGAAGGATTTCTAGGTGTACCTGTTCCATGATTAC

Sbay\_c668 ACTATAACGAGTATCACGATAGTGAAACAGACTCTCTCACCAGACTTT  
Sb08\_sb15 ACTATGAAAGAGTGTACGATAAGAAACAGACTCTCTCACCAGACTTT

Sbay\_c668 ACAATATTACCTAAGACACATTCCAATCGCCACCTTTCTTTGAAGGCCA  
Sb08\_sb15 ACAATATTACCTAAGACACATTCCAATCGCC---TTCTTTGAAGGCCA

Sbay\_c668 GAAAAACGATGAGTCTGCTTCCAACAGTCTCTCAATAAAATCTCCGAAG  
Sb08\_sb15 GAAAGAGGATGACTCTGTTTCCAACATCTCTCAATAAAATCTCCGAAG

Sbay\_c668 CTTCTGAAGAAAAGAACTGACATTAATAATATTTTCTTAGTATCTCAAAA  
Sb08\_sb15 CTTCTGAAGAAAAGAACTGACATTAAGAAATATTTTCTTAGTATCTCAAAA

Sbay\_c668 TGGGAAAATCGTAAGGAGAGACTATCCAAGCACTCCAGTGATTACTAATG  
Sb08\_sb15 TGGGAAAATCGTAAGGAGAGACTATCCAAGTACTTCAGTGATTACTAATG

Sbay\_c668 AAGCACTGATGGTAAACAACTGGAAAAAATTGGAACAAACTATGCTGT  
Sb08\_sb15 AAGCACTAATGGTAAACAACTTAGAAAAAATTGGAACAAATTATGCTGT

Sbay\_c668 CAAAGGAAAGCACAAATAAATGAAAGGCTAAACGATAAAAAAAAGTGGTT  
Sb08\_sb15 CAAAGGAAAGCACAAATAAATGAAAGGCTAAACGATAAAAAAAAGTGGTT

Sbay\_c668 TGCATCCAGATATTATTTTCCCAAAGAACACATTAAAGCCATTATATA  
Sb08\_sb15 TGTTCAGCCAGATATTATTTTCCCAAAGAACACATTAAAGCCATTATATA

Sbay\_c668 GAGGTGATGATGCTACGCCTTGTACTAAGGAGCAAAGAAGAAAACACAAA  
Sb08\_sb15 GAGGTGATGATGCTACGCCTTGTACTAAGGAGCAAAGAAGAAAACACAAA

Sbay\_c668 ATATCCAAACAAAAGATTGGATATCCTAATAATCCGAAAACAATCTTTG  
Sb08\_sb15 ATCTTCCAAACAAAAGATTGGATATCCTAATAATCCGAAAACAATCTTTG

Sbay\_c668 TTATATTAGTGGTAGCAAGCATACTTGGGTGGCCCTAGATTGGACCCTTT  
Sb08\_sb15 TTATATTAGTGGTAGAAGGCATACTTGGGTGGCTCTAGATTGGACCCTTT

Sbay\_c668 GCAAGATTGCACAAGATATGGATCATATTGTGGTTTTAACTACGCTACCA  
Sb08\_sb15 GCAAGATTGCACAAGATATGGATCATATTGTGGTTTTAACTACACTACCA

Sbay\_c668 AGATTGATATGTAACAAGAAAAAAGAACGAAAAGGAGATACAGAATGGGC  
Sb08\_sb15 AGATTGATATGTAACAAGAAAAAAGAACGAAAAGGGACACAGAATGGGC

Sbay\_c668 ATCGGGATATCAAAAGGAAACAATGATCACAGACTGCGTGACATCTTTG  
Sb08\_sb15 ATCGGGATATCAAAAGGAATCAATCGACCGAAAACCTCAGTGATATCTTTG

Sbay\_c668 AGTACGTTTTACAGCTTTAAAGGCAGTTAAAGTTCTGTAAAAGTTACT  
Sb08\_sb15 AGTACATTTTTACAGCTTCTGAAGGCAGTTAAAGTTCTGTAAAAGTTACT

Sbay\_c668 TTGGAAATAGTTATAGGCAAAACTAAAAATCATGGTAAAGCGCTATCAA  
Sb08\_sb15 TTGGAAATAGTTATAGGCAAAACCAAAAATCATGGTAAAGCGCTATCAA

Sbay\_c668 CGTTCATACTCCAGACGCTTGGTTATGCTACTTTGAAGCATAAAAGAA  
Sb08\_sb15 CGTTCATACTCCAGACTTCTTAGTTATCGCTACTTTGAAGCATGAAAGAA

Sbay\_c668 ACGAAAACTAGTCAAATATAGATCTAAAGAACTGCTGATGTTTTGCT  
Sb08\_sb15 ATGAAAAGCTCATCATATATAAATCTAAAGAACTGCTGATGTTTTGCT

Sbay\_c668 GTAAGCTTTCCTATCCCGTATTTATCGTTCCTCAAAAAGAATGTATTC  
Sb08\_sb15 GTAAGCTTTCCTATCCAGTACTTATCGTTCCTCAAAAAGAATGTATTC

Sbay\_c668 ATTCGAACTGAATTTACAGAGAAAAATAAACGGATACATAAATAATAGTA  
Sb08\_sb15 CTTCGAACTAAATTTACAAGAAAAATGAATGGATGCATAAATAATAGTA

Sbay\_c668 GTAGCAATAGCCATACAAAAATCAACGTAAGTACGAAATAATACAAAT  
Sb08\_sb15 G---CAATACCATATAAACAATGAAATACTGACAGAAATAATACGAAT

Sbay\_c668 GAATCACCATTGGAACAACGAAACCTAGCCATATCTCCAGAAATCTC  
Sb08\_sb15 GATCACCATTGGAACAACGAAATAGTAGCTATATCTCCAGATCTC

Sbay\_c668 CTTAGATTCATTTGCAGAAGACTTTAAAAGAAAAATTCATCAACAAGC  
Sb08\_sb15 CTTAGATTCATTTGCAGAAGACTTCAAAA-AAAAAATTCATCAACAAC

Sbay\_c668 ACTCCAATTCTTCATGAATCTGTTTTCAGAAAAAGCTGCTAAGTGTGCGC  
Sb08\_sb15 ACTCCAATTCTTCAATGAATATATTAGAAAAAGCTACTAAGTGTGCGC

Sbay\_c668 AAAATTCAAGAGAGAAATCACCGACAATTTAAGGACATTACAAATGA  
Sb08\_sb15 AAAATTCAAGGAGAAATCACCGATGATTTAAGACATTACAAATGA

Sbay\_c668 TAAACATCAATTGAAACATGGCGCAGATGATGTGAAGTTGACCAAAATTTG  
Sb08\_sb15 TAAACAACAACGAAATGTAGCCCAAAGACATAAAGCTGACCAAAATTTG

Sbay\_c668 ACATTATAATAAAGGAATCTCTAAAATCTTCTTTGGAGATAGACAAGATG  
Sb08\_sb15 ACATTATAATAAAGAGTCTCTAAAATCTTCTTTGAAGATAGACAAGATG

Sbay\_c668 CCTGGCAATGACTCGTCGAGCTCTGATTACAATGAAAATTTTGCTAACCT  
Sb08\_sb15 CCTGGAATGACTCATCGCACTCTGATCACAATAAAAATATCGCTAATCT

Sbay\_c668 AAAGAAATCTTAAATAGGCAATCAGCAAAGGGACAGAATACAGAAAAT  
Sb08\_sb15 AAAGAACTCTTAAATAGGCAATCAGTCAAAGGGTACAGAATACAGAAAAT

Sbay\_c668 CATTAATTCCATATTCCTTTCACAAGAACAGGTCATTCGAATACCATT  
Sb08\_sb15 CATTAATTCCATATTCCTTTCACAAGAACAGCTCCATTTGATACCGTT

Sbay\_c668 TGCCCAGCACCTCACCAACCTCTCAAATCAAGTTTGCTAACACAGTAAA  
Sb08\_sb15 CTCCCAGCACCTCACCAACGTCCAAATCAAGTTTGCCAATCAGTCAA

Sbay\_c668 GCACAAAGATGGGAGAGCGCCCTTGGCAAAGTCAAAAACCTACTGATA  
Sb08\_sb15 GCACAAAGATGGGAGAGCTGCCCTTGGCAAAGTCAAAAACCTAGCAGATA

Sbay\_c668 TGGAAACACCAAGTCTTTTGAAGAAGAAATTTAACGACTGACCTGCC  
Sb08\_sb15 TGGAACTACTAGTCTTTTGAAGAAGAAATTTAACGACTGACCTGCC

Sbay\_c668 GATAATCGCAGTAGTGTGCGATAATACTTTTCGTTAAGAAAAGTTAAAAG  
Sb08\_sb15 GATAATAGAAGTAGTGTGCGATAATGACATTTTCGTTAAGAAAAGTTAAAAG

Sbay\_c668 TACCGGTGCACTGAGAAAAATCAAAAGCAACGACTCTTCTAGTAGCTCTA  
Sb08\_sb15 CACTGGCACACTGAGAAAAATCAAAAGCAACGACTCTTCCAGTAGTCTG

Sbay\_c668 GCTCTAGAAAAAGCTCATCCAGTTATACCACCGTAAATGCTTTTACTGGT  
Sb08\_sb15 GCTCTAGAAAAAGCTCATCCAGTTATACCACCGCAAATGCTTTTACTGGT

Sbay\_c668 GGCGGGTTGGGATCTTTAGGGTGTTTAAAAGTGGAAAGTTCTCTCGGGAA  
Sb08\_sb15 GGCGGGTTGGAAATCTTTAGGGTGTTTAAAAGTGGAAAGTTCTCTCGGGAA

Sbay\_c668 CAAATCATTCAG---TAGAAGAAAGTACCGGCAGTGAAGTTGTAGATA  
Sb08\_sb15 CAAATCATCTAGTAATAGAAGAAAGTACCGGCAGTGAAGTTGTAGATA

Sbay\_c668 CCAGTGATCGTAGCGGCAAGAAAAAGAAGAAAAAGAAAAAGTCATTGTTT  
Sb08\_sb15 ACAGTGATCGTAGCGGCAAGAAAAAGAAGAAAAAGAAAAAGTCATTGTTT

Sbay\_YOR019W→  
Sbay\_c668 TCCGCTTGGTAACTATGAGTTGATGTTTTCTTACATTTGACCACTTCT  
Sb08\_sb15 TCCGCTTGGTAAACCGTGAAGTTGCTGTTTTCTTATCATTAGTCCAC-CT  
Spas\_sbYOR019W→

Sbay\_c668 ATCTCAGTTTGGTAATTCAGCCCGTGAATCGATTATCAACAGATAAT  
Sb08\_sb15 GCCCAGTTTGCCTAATTCAGCCCATGAAATCGATTATCAACAGATAGC

Sbay\_c668 CAGAGGAAAGATGGGAAGGCCAAAGTCACACGACATTAATCACAGAATT  
Sb08\_sb15 CAGAGGAAACAGCGAAGGCCAAAGTCACACTACATTA--CACAGAATT

Sbay\_c668 TTATTCATTTTCTTTTCTGTCTATACGTAATGGTCTATTAACAGGTAC  
Sb08\_sb15 TATCTCATTTTCTTTTCTGTCTATACGTAATGGTCTATTAACAGGTAC

Sbay\_c668 ATACATACAAAGCATGTATATAAA-TTTTTTTGGAAAAAAC TAGATCC  
Sb08\_sb15 ATACATACAAAGCATGTATATAAAATATTTTTTGGAAAAAAC TAGATCC

← Sbay\_YOR020C  
Sbay\_c668 TCAGTCCTTAGCAATCTTAGCTAAGATTCTGTGTCTCTGAAAAGAATAA  
Sb08\_sb15 TCAGTCCTTAGCAATCTTAGCTAAAATTTCTGTGTCTCTAAAAGAATAA  
← Spas\_SbYOR020C

Sbay\_c668 CTTGTCCTCGTTGCCCAACTTAATGGTAGAACCGCCAAACTGTGGAATC  
Sb08\_sb15 CTTGTCCTCGTTGCCCAACTTAATGGTAGAACCGCCAAACTGTGGAATC

Sbay\_c668 AAACTTGGTCACCTACTTTAACCTGTGGAACAACCTTATTGCCATTAGC  
Sb08\_sb15 AAACTTGGTCACCTACTTTAACCTGTGGAACAACCTTATTGCCATTAGC

← Sbay\_YOR020C  
Sbay\_c668 ATCAGTGAAACCTG.....  
Sb08\_sb15 ATCAGTGAAACCTG.....  
← Spas\_SbYOR020C

1-3-b) SbxV > SbvIII

Sbay\_YOR017W →  
Sbay\_c606 .....GACAGAAGAGCTAACGAACCTTCGTTTATATAATGAAAATCTTTT  
Sb15\_sb08 .....GACAGAAGAGCTAACGAACCTTCGCTGTATAATGAAAATCTTTT  
Spas\_SbYOR017W →

Sbay\_c606 AGAAGAGAGATTAGATTGTTGGTTGGCTTTAAGGTAAACGTCAAGGCATT  
Sb15\_sb08 AGAAGAGAACTTGGATAAGTTGGTTGGCTTTAAGGTAAACGTCAAGGCATT

Sbay\_c606 TCTACCATCATCACCTAGTACTATGAATCTGCCAACATTTGCTTCGAAA  
Sb15\_sb08 TCTACCATCATCACCTAGTACTATGAATCTGCCAACATTTGCTTCGAGA

Sbay\_c606 AAGAAAGATATTTCTGGACCCCGATGCCCGTGAATATATTTCTGACATAAT  
Sb15\_sb08 AAGAAAGATATTTCTGGACCCCGATGCCCGTGAATATATTTCTGACATAAT

Sbay\_c606 GAAACGTGATTGGTATAAGGATATACGATCTACACAACTCCAACTTCT  
Sb15\_sb08 GAAACGTGATTGGTATAAGGATATACGATCTACACAACTCCAACTTCT

Sbay\_c606 TCCATGAATCAGATGTTCCACTTGGGAAGTCAATTCTACCTTTACAGAT  
Sb15\_sb08 TCCATGCATCAGATGTTCCACTTGGGAAGTCAATTCTACCTTTACAGAT

Sbay\_c606 ATTATCGATAAGCAAGAGTTAAGGAGTCTATACCTGAAAATATCTAGATGT  
Sb15\_sb08 ATCATCGATAAGCAAGAGTTAAGGAGTCTATACCTGAAAATATCTAGATGT

Sbay\_c606 CAAGTTGAAGGCGTTGAAAACCAAGTCATTACACGTCAGGAACCAGACA  
Sb15\_sb08 TAAATTAAGGCGTTGAAAACCAAGTCATTACACGTCAGGAACCAGACA

Sbay\_c606 CATCCCAGAAAGGATGAAATTGTAATCGGATTAATAAATTGCAAACCCGC  
Sb15\_sb08 CATCCCAGAAAGGATGAAATTGTAATCGAATCAATAAATTGCAAACCCGC

Sbay\_c606 AAGAAATACAGCAGTAGTACAAGTCACAGGAAATCATCAATTTGGTCC  
Sb15\_sb08 AGAAACACGGCAGTAGTACAAGTCACAACAATCATCAATTTGGTCC

Sbay\_c606 TCACGACTACAAACCAAGCTGCGTGCATACCTCAAAGGGTGCCTATAC  
Sb15\_sb08 TCACGACTACAAACCAAGCTGCGTGCATACGCCAAGGGTGCCTATAC

Sbay\_YOR017W →  
Sbay\_c606 GAAGAAAACCTTTGGAAAGTAGTGCCTAAGTTGCATGCCTAAGGAATGATG  
Sb15\_sb08 GAAGAAAACCTTTGGAAAGTAAATGCTAAATTGCATGCTAAGGAATGATG  
Spas\_SbYOR017W →

Sbay\_c606 TTAAGCACTAGAACTTAATGTGAGCGAAAAAGTTTAACTCTTGAGT  
Sb15\_sb08 TTTAGCGCCAGAACTTAATGTGAGCGAAAACAATTT-AATCTCTTAAGC

Sbay\_c606 GTTTCCTCTTGCAATTTTTCACTCATATAACTATTGTATATTATTACAA  
Sb15\_sb08 GTTTCCTCTTGCAATTTTTCACTCATATAACTATTGTATATTATTACAA

Sbay\_c606 ATACTAATATATATFCACACTATCTTGTAAAGTACTAACCATTTTTATCAT  
Sb15\_sb08 ATACTAATATATATFCACACTATCTTGTAAAGTACTAACCATTTTTATCAT

Sbay\_c606 TGACAGCTCTCGAGAGGGCCGATATTTTTAGCCATATGTGTACTCTAA-  
Sb15\_sb08 TAATAGCTCTCGAGAGGGCCGATATTTTTA-----TGTGTACTCTAA

Sbay\_c606 GAGATGTTGAGAGAAGGGCTTCTAACTTACAAGAAATGGCCATCTTG  
Sb15\_sb08 GATACC GTT AAGAGAAGG -CTTCTAACTTACAAGAAATGGCCATCTTG

Sbay\_c606 ACCAAGCAAAAAACCGCTTATCATGATCGTAATTCGGAATGAAGCTCC  
Sb15\_sb08 ACCA-GATAAAAACAGCTTATGTGTCGTAATTCGGAATGAAGATTT

Sbay\_c606 AGAGATTGACAGCCCACTAGGCAACTTGCGGTCCCTCTGCTCAGTAAAA  
Sb15\_sb08 CTAGATTACAGTCCCACTAGGCAACTTGCGGCCACTCTCTAACTATTC

Sbay\_c606 ACGGCATGTTTTTTGCTTAGAAAGCCTCTTGCATTTTTCTGCATTTCT  
Sb15\_sb08 GCGG-CATGAGTTTTGCTTAGAAAGCCTCTTGCATTTTTCTGCATTTCT

Sbay\_c606 TTCTCACTGCTTAGCCGAAAAAAACAGAAAAGGGGATCCCTTTTCAAAA  
Sb15\_sb08 TTCTTATTGCTTAGCCGAAAAAAAGAAAAGGGGATCCCTTTTCAAAA

Sbay\_c606 CAAATATGTGAACGAGAT-----GCGAATCTAATATAGATAACGAGTAG  
Sb15\_sb08 CAAATATGTGAACGAGATAGAGATGCAATCTAATATAGATAACGAGTAG

Sbay\_c606 AGAAGTCATCCTAGTTTCCACCTATCACTCGCTCATCCCTTCATATAAAT  
Sb15\_sb08 AGAAGTCATCCTAGTTTCCATCTATCACTCGCTTCCTTCATATAAATC

Sbay\_c606 AACGATGTTTTCTCTTCTTCGACCTTCGAAAGAGCCATTATATTT  
Sb15\_sb08 AACGATGTTTTCTCTTCTTCGACCTTCGAAAGAGCCATTATATTT  
→ Sbay\_YOR018W  
→ Spas\_sbYOR018W

Sbay\_c606 GACATTAGACTAAGAAGCTTAGATAATGATGTTTTGCTAATAAAAGGTCC  
Sb15\_sb08 GACATTAGACTAAGAAGCTTAGATAATGATGTTTTGCTAATAAAAGGTCC

Sbay\_c606 TCCAGACGAGGCATCCTCTGTGCTACTATCTGGTACTATTGTCTTATCTA  
Sb15\_sb08 TCCAGACGAGGCATCCTCTGTGCTACTATCTGGTACTATTGTCTTATCTA

Sbay\_c606 TTACGGAACCAATCCAAATCAAGTCTCTGGCTTTAAGACTTTTCGGAAAA  
Sb15\_sb08 TTACCGAACCTATCCAAATTAATCTTTAGCGTTGAGACTTTTCGGAAAA

Sbay\_c606 TTGAGGCTAAATGTTCCAACAGTTTGCAAACTGCCAATGGACCATATAA  
Sb15\_sb08 TTGAGGCTAAATGTTCCAACAGTTTGCAAACTGCCAATGGTCCATATAA

Sbay\_c606 GCGATACTCCAAATTCGAAAGGAGTATATACTCTCATTTTTGGGACGATT  
Sb15\_sb08 ACGATACTCCAAATTCGAAAGGAGTATATACTCTCATTTTTGGGACGATT

Sbay\_c606 TCAATATAAAGAGTTATTTTTCAAACTTGTATGATTAATCATAATAATGGT  
Sb15\_sb08 TCAATATAAAGAGTTATTTTTCAAACTTGTATGATTAATCATAATAATGGT

Sbay\_c606 AAAATAACTATTTCTAGTAAATCCTCAACAAATTTAGCGACTTTGCCAAA  
Sb15\_sb08 AAAACAACATTTCTAGTAAATCCTCAACAAATTTAAGCGACTTTGCCAAA

Sbay\_c606 AAGGACAAGAGCTCTTTCTAGTACATCAATTAATATCAAATAATGGACAAA  
Sb15\_sb08 AAGGACAAGGCTCTTTCTAGTACATCAATTAATATCAAATAATGGACAAA

Sbay\_c606 CAAGTACGAATAAAAACTATCAACACCTTGGTAAAGGTAACATGAGTTTC  
Sb15\_sb08 CAAGTACGAATAAAAACTATCGCACCTTAGTAAAGGTAACATCGAGTTTC

Sbay\_c606 CCCTTTAGCGCAATCATTCCAGGTTTCGTTGGTAGAAAGTGTCTGAAGGTTCT  
Sb15\_sb08 CCATTTAGCGCAATCATTCCAGGTTTCGTTGGTAGAAAGTGTCTGAAGGTTCT

Sbay\_c606 ACCAAATGCTGCCGTCACGTATACATTAGAAGCTACCATCGAGAGACCTA  
Sb15\_sb08 ACCAAATGCAGCCGTCACGTATACATTAGAAGCTACCATCGAGAGACCTA

Sbay\_c606 AACAACTCTGATTTAGTTTGTAAAAAGCATCTAAGAGTGATCCGAACATTG  
Sb15\_sb08 AACAACTCTGATTTGTTTGTAAAAAGCATCTAAGAGTCATTCGAACATTG

Sbay\_c606 GCAACAGATGCGGTTGAATTATCTGAAACAGTATCCGTAAGATAACTCATG  
Sb15\_sb08 GCAACAGATGCGGTCGAATTATCTGAAACAGTATCCGTCGATAACTCATG

Sbay\_c606 GCCTGAAAAAGTTGATTATACGATCTCTATTCCAACCTAAGGCGATTGCCA  
Sb15\_sb08 GCCTGAAAAAGTTGATTATACAATCTCTATTCCAACCTAAGGCGATTGCCA

Sbay\_c606 TCGGTTCTTCCGCCATGATTGATATCTTGATTGTTCCCGTATTGAAGGGA  
Sb15\_sb08 TTGGTTCTTCCGCCATGATTGATATCTTGATTGTTCCCGTATTGAAGGGG

Sbay\_c606 CTAAAATTGGGTCCGGTTAGGATTACTTTAGTAGAAACGTCTCAGTACTG  
Sb15\_sb08 CTAAAATTGGGTCCAAATTAGGATTACTTTAGTAGAAACTTCTCAGTACTG

Sbay\_c606 TGGTAGCTATGGGGGATTATTAACCAAGATAGAGTAGTGACCAAGTTAA  
Sb15\_sb08 CGGTAGCTATGGAGGGATTATTAACCAAGATAGAGTAGTGGCCAAGTTGA

Sbay\_c606 AATTGAAAGATCCATTGAAGCATATTCGCCAAATAAAGAAGAAAGAAGT  
Sb15\_sb08 AATTGAAAGATCCATTGAAGCATATTTGCCAAATAAAGAAGAAGAAGAC

Sbay\_c606 TGAATGAAACTAACGACGAGGATTTTGATACGAGTACTGGGGAGTTTCA  
Sb15\_sb08 CTGAATGAAACC AACGACGAGGATTTTGATATGGC ACTGGGGAGTTTCA

Sbay\_c606 AGACAAATGGGAAGTCAAGCCTTGTTGAATATACCTGCAAGTTTGTCCA  
Sb15\_sb08 AGACAAATGGGAAGTTCAAGCCTTATTGAATATACCTGCAAGCTTGTCCA

Sbay\_c606 AGTGCTCTCAAGACTGCCGAATCCATCTAATATCAAAGTTCCGCATAAG  
Sb15\_sb08 AGTGCTCTCAAGACTGTCGAATTTATCTAATATCAAAGTTCCGTCAATAAG

Sbay\_c606 ATAAAATTTACAATAAGCTTACTTAATCCGGATGGCCATATTTCAGAATT  
Sb15\_sb08 ATAAAATTTACAATAAGTTTACTTAATCCGGATGGCCATATTTCAGAATT

Sbay\_c606 GCGTGCGGCATTGCCGTTCAATTGTTCAATTCACCATTTGTTCCAGTGA  
Sb15\_sb08 GCGTGCGGCATTGCCGTTCAATTATTCATTTACCATTTGTTCCAGTTA

Sbay\_c606 ATGTAAAAACCTCTGATGTTATCGAGAGAACGCTTAAGACGTTTGGTCCT  
Sb15\_sb08 ATGTAAAAACGCTCTGATGTTATCGAGAGAACGCTTAAGACATTTGGTCCT

Sbay\_c606 TCATAC CAGGCCACAAC CAAAACGATAGCTCATTTAGCAACAAAAGATT  
Sb15\_sb08 TCATATCAGGCCACAAC TCAAACGATAGTTT CATTTAGCAACAAAAGATT

Sbay\_c606 TATAGATAAATACTGAAGAAGACGTCATTTTCCAAAGATCTGTGTCTGAGT  
Sb15\_sb08 TATAGACAATACTGAAGAAGACGTCATTTTCCAAAGATTTGTGTCTGAGT

Sbay\_c606 TACAATTGTCTTCGATGCCGACTATAGTAAGTGGTTCCAATTTAAATGCT  
Sb15\_sb08 TACAATTGTCTTCGATGCC TACTATAGTAAGTGGTTCCAATTTAAATGCT

Sbay\_c606 CACAATTCAGATA CAGAAACTTCGACGACTAATGATGCGGCTATGGTGGC  
Sb15\_sb08 CACAATCAGACG CAGAAACTTCGACTACCAATGATGCGGCTATGGTAGC

Sbay\_c606 CAGTCTAATGGTACCTCCTAACTACGGAAATCATGTTTATGATCGTGTAT  
Sb15\_sb08 CAGTCTAATGGTTCTCCTAACTACGGAAATCATGTTTATGATCGTGTAT

Sbay\_c606 ATGGTGAAACAACCAATCAAAACAAAATTCGACACCAACACCGCCAATT  
Sb15\_sb08 ATGGTGAAACAACCAATCAAAACAAAATATCGGCACCAGTACCCCAATT

Sbay\_c606 GCCATCGAGCCACAAGTCCTTGACGAAATCCAAAACCTGTATATCTCGGA  
Sb15\_sb08 GCCAGCGAGTCACAAGTCCTTGACGATATCCAAAACCTGTATATCTCGGA

Sbay\_c606 TAGCAACGATACTAACAATACTACTTCGGCAGCAACCTGAAATTAGAA  
Sb15\_sb08 TAGCAACGATACTAACAATACTACTTCGGCAGCAACCTGAAATTAGAA

Sbay\_c606 TTGATGACAGT-----AATAACTGTGACTCCCAAGCAGCAGCGTCAAT  
Sb15\_sb08 TCGATGACGGTAACCCAATAACTGTGATTCCCAAGACAACAGTGTCAAT

Sbay\_c606 AATAGTAGCTCAAAATTTGGTTATTAATTTTTTGGACGTTAATGATAACAG  
Sb15\_sb08 AATAGTAGCTCAAAATTTGGTTATTAATTTTTTGGACGTTAATGATAACAG

Sbay\_c606 CAACAGCGCCTCCGAAATAGATATAATAGTAACACTA---ATACAGGAC  
Sb15\_sb08 CAACAGCGCCTCCGAAAGTAGATATAATAATTACACTACTAATACAGGAC

Sbay\_c606 TGAATAGCCCCTCGTTGACTCCGAGCTTGCTCACTTATCGAGAAGAAAT  
Sb15\_sb08 TGAATAGTCTTCGTTGACTCCGAGCTTGCTCACTTATCGAGAAGAAAT

Sbay\_c606 TCTTACAGTCGGCAAACCTCATCTACATCCTTAAAGAACGATCTGGAACT  
Sb15\_sb08 TCTTATAGTCGGCAAACCTCATCTACATCCTTAAAGAACGACTTGGAGCT

Sbay\_c606 TACGACTTTAAGTAGAGTACCTTCATATGACAAAGCCATGAAATCGGACA  
Sb15\_sb08 TTCGACTTTAAGTAGAGTACCTTCATATGACAAAGCCATGAAATCGGACA

Sbay\_c606 TGATCGGTGAAGATTTACCACCCGCTTATCCAGAAGAAGAAATTTGGTCT  
Sb15\_sb08 TGATCGGTGAAGATTTACCACCCGCTTATCCAGAAGAAGAACTTGATTCA

Sbay\_c606 CAACAAAACAAGAAATCGAATTAGAAAGGCCAAAATTTACATCATAA  
Sb15\_sb08 CAACAAAACAAGAAAGTGGAGTTAGAAAGGCCAAAATTTACACCATAA

Sbay\_c606 GTCTACATCGTCTTTATTGCAATTTCCAGGTTCAAGTAAAACTTCCAATA  
Sb15\_sb08 ATCTACATCGTCTTTATTACAGTTTCCAAGTTCAAGCAAACTTCCAATA

Sbay\_c606 ATGTAAAAAGCTCGTCTAGCAAAAGGTCACCTTGTCTATTCTCCATTACCA  
Sb15\_sb08 ATGTAAAAAGCTCGTCTAGCAAAACCCATTTGTCTATTCTCCATTACCA

Sbay\_c606 AAAACTAACAATACCTCCTCGGTATCATTACAACAACCTGACAAGGAGCAA  
Sb15\_sb08 AAAAGTAACAATACCTCCTCGGTATCATTACAACAACCTGACAAGGAGCAA

Sbay\_c606 CACGGATAGCTCCTTAAATTTGAATCTATCTTTCATGGCCACCAAAAGTA  
Sb15\_sb08 CACGGATAGCTCCTTCAATTTGAATCTATCTTTCGCGGCCCAAAAAGCA

Sbay\_c606 ATTCGGCAAGTAGACACTTTTCATCAATATGACACCATCGTTGGCTACT  
Sb15\_sb08 ATTCGGCAAGTAGACACTTTTCATCAATATGACACCATCCTTG---ACT

Sbay\_c606 AATTCAAATAACAATAGTCAAACAATCTATACTTTGGCAACGCTGATCT  
Sb15\_sb08 AATTCAAATACTGATAGCCAAAACAATCTATACTTTAGTAACGCTGAGCT

Sbay\_c606 TGCTTCTGATAACGGCTCAAGCAAGGCCGGAAAGAAAACCTACATGGGCTCAG  
Sb15\_sb08 CGCTTCTGATGCGGATCAAGCAAGGCCGGAAAGAAAACCTACATGGGCTCAG

Sbay\_c606 TCGAAACTCAGAGATCAGCTCCTCATCAGTCAGGAGTAATAACAGTAAC  
Sb15\_sb08 TCGAAACTCAGAGATCAGCTCCTCATCAATTAGAGTAATACAGTAAC

Sbay\_c606 TCACCATCTAGACAAAAGACGGGTTGTTTTCCAAC TTCATGGAGATGTT  
Sb15\_sb08 TCACCATCTAGACAAAAGACCGGTTCAATTTCCAAC TTCATGGAGATGTT

Sbay\_YOR018W →  
Sbay\_c606 CACAAGACGAGACCGCGGATAGAGCATTTC CATTTCGTTGATATCCGTC  
Sb15\_sb08 TACAAGACGAGACCGCGCATAGATCATTTC-----TTTATATCCGTC  
Spas\_SbYOR018W →

Sbay\_c606 CGAACTTAAACATACAAACTATAAATAGTCAACGTATATCTGTACAGCTA  
Sb15\_sb08 CGAACTCTAACATGCGATCTGTAAGTAGTGAACGTATATCTGTACAGCTA

Sbay\_c606 GGCATATATATTATGATCAAATAATCAAATGTATCATACAGTTTAAAAAG  
Sb15\_sb08 GGCATATATATTATGATGAATAATCAAATGTATCATACAATTTAAAAATA

Sbay\_c606 AACTAAGAATCGTTGAGTGTCTTG-GGTGGTATTTGTCTCACTAC  
Sb15\_sb08 AACTAAGAATCGTTGAGTGTCTTCGAGGTGGTGAATTTGTCTCACTAC

Sbay\_c606 ATCGTTTCCAGAAGTGCCACATTTATATCAATAAATGGGGTTCGGTAA  
Sb15\_sb08 ACCACTTTCCGGAAGTGCCACGTTCACTCAATAAATGGGATTATGGTGA

Sbay\_c606 CCAAGGCGAAAACGGTTTGGCAAAGAAAACATTTACGTTACGTAATAT  
Sb15\_sb08 CCAAGGCGAAAACATTTTGGCAAAGTAAACGATCCATGCTTACGTAATAT

Sbay\_c606 TGCCTCATCTCCTCACCTGCCTTTAAAACAATAGAAA-GCGGAAGGAG  
Sb15\_sb08 TGCCTAATCTCAC-----CTGCCTTTAAAACAATAGAAAAGCGGAAGGGG

Sbay\_c606 GCCGATTGGGAAACGCCAAAGTAGAAAACAAATGCGAAAACCAATCAGAA  
Sb15\_sb08 GCCGAATTTGGAATAATGTAAAAGTAGAAAACAAATGCGAAAACCAACAGAA

Sbay\_c606 AGACCTCAACAGTGTGCTCTGATTTAATTCGCACACATTTGCTACTTTC  
Sb15\_sb08 AGTCTCTGTAGTGTGATATAATCTCACTGCACGCAATTTGCTACTTCC

Sbay\_c606 AGGACTACTATCAAAA-TTTGAATCGTTGGTTAAGTCTATACTATTT  
Sb15\_sb08 AGGACTACTCCAAAAATTGCAATGTTTTGTTGAGTTTGTAATTTTT

Sbay\_c606 -AAGATCTATTTGACGTTGTCTACCCTAAATGTTCTCTCAGGCCTCTAT  
Sb15\_sb08 TAAGATCTATTTGATGTTTCTACCCTAAATATTGCTCTAAGGCCTCTAT

Sbay\_c606 AGTTTATA TTTTACCTACAATATCTCTT-AATGCAAATCC----AATCA  
Sb15\_sb08 -----TTTATGCTACGATATCTCTTGAGTGCAAATCTTGGAATCA

Sbay\_c606 TTTCCCTTCAATAGTTACAGTCTCTGCAGTTAAAAGAGTTTAGGGCTCC  
Sb15\_sb08 CTTTC-TCAAATAGTTACGAACC-CTCTGCAAAAAGAGTTTGGGTTC

Sbay\_c606 TTGCTTGATGACCCTCTTTTCTGCAATGTAATCAAGTGTGCTCGAT  
Sb15\_sb08 TTGCTTATG-CCCTACTTCTTCTACGAGGCAATCAAGCCTCGCTCTAT

Sbay\_c606 TGTATGTCCAGAATAACCGATATGGCAAAGTAAGAAATAAATTTAGAAA  
Sb15\_sb08 AGTACGTCCAGAATAACAACGCGGCTTGTAGTGTATTAGATTTGGACAA

Sbay\_c606 TCATGTTCAGTCAG-----  
Sb15\_sb08 TCATGTTCAGTCTGCATATTTCAAAATGTTTAGGTGTTTTTGTAGTA

Sbay\_c606 -----TCTAT-----  
Sb15\_sb08 ACAAGATTCGACTATCGTGCACTCTACTATTATATACGGTAGGGTGT

Sbay\_c606 -----  
Sb15\_sb08 GGAAGATGACATAAATCACAGGACCGGCAAGACAAGATTTAACTTTGAT



Sbay\_c606 --AG-----TCA  
Sb15\_sb08 CGAATTAATGGGATCTGGAAGCGCAAAGATTGATATTATAATAGGATCA

Sbay\_c606 ATG-----C-----  
Sb15\_sb08 ATGAACGGAGTGCATAAAAAGTAAGATATGATCACTTACAGTATTATGCA

Sbay\_c606 -----T-----  
Sb15\_sb08 AAATCACATTATTATAGTTTGTGGATTCCCAAATCCATGAGAAGAATATCT

Sbay\_c606 -----C-----  
Sb15\_sb08 ACTATAATCCGTACACATAATATTATAACATTAAGACATAATGGAATACC

Sbay\_c606 -----TTC-----  
Sb15\_sb08 GAAGATTATCATCAAATTTAAAGGTCGATAATGTTGTATTAGGTTCGTA

Sbay\_c606 -----ATTCGTTGGAGTCTCCTG-----ATCAAAC  
Sb15\_sb08 GCTTATATCTTTCAGTCGTCGAGGTGCTCCTGTTATAGATTGATCAAAC

Sbay\_c606 ATGACTAATGTTGCCACTAAAATATAAATTTGAGAGAAATGCTATACT  
Sb15\_sb08 ATGACTAATGTTGATACTAAAATATGATTTTGGGGAAATA--CT-TATT

Sbay\_c606 TTTGCATCCTCAAGTAGCCGAACTCTTTCTGGCATTTTCGAGTTTCA  
Sb15\_sb08 TTTAAATCTCCGAGAGAGCCAAA---TTTCTG---TTTCGGTCTTCG

Sbay\_c606 TTC-TTTACTACA-CGGTAAACAGTTTTTCATTTGATTTAAAAGAGTTT  
Sb15\_sb08 CTCCTTTTTTGTATCGTTACACAAGTTTTTCATTTCTATTTGAAAGAGTT-

Sbay\_c606 GCCGCTGCCGCTCTATCATTCCCTTGATATTGAATAAACTGAAATGTTCT  
Sb15\_sb08 GCCGCTACCGCCCATTATACCCTTGATATTGAACATACTGAA-TATTCT

Sbay\_c606 CTTTTTCAATTACGCAAAAGCAAGAACCGAGAAAAAGTTACGTAA  
Sb15\_sb08 CTTTTTCAATTACGCAAAATAAACAAAACACGAGAAAAAGTTACGTAA

Sbay\_c606 TATCCGTTCCAAACCAATATTAACGAAATCGCTC-TTTCAACTTGTGGAA  
Sb15\_sb08 TGTCGTTGTAAACCAATCTTAACAATACTGTTGATATTTAGTTAATCTAG

Sbay\_c606 CAAGATCCACTATCGTCCATAT--ATTACTATTATAT-ACGGTGTGAAA  
Sb15\_sb08 TAAGTTTTAATAATTAAGGATTAGCAGTTCTTCTTATATTTATATATA

Sbay\_c606 AGATGACGTAATTACAAGACCAGTAAGACAAGATTGAAA--CTG-TCGT  
Sb15\_sb08 AGA-GAGGTATATAAAACACACGCTGATTGGTTATTTAAAACCTAATAGT

Sbay\_c606 CGAATTAATGGAAGCTGAAGCGCAAGGATTGATATGTA--ATAGGATC  
Sb15\_sb08 TCAGACATAGTTCCAGAAATATGGAAATGAGTTATCATGTATAACTCGTCC

Sbay\_c606 AATGA-ATGATAACAATATAAAGAGGAATAGAATTATTTAGAAATCTATG  
Sb15\_sb08 TCTTATATCTTAATTTCTGATCAATTAATAGACCT-TTAACTCTATCTTC

Sbay\_c606 CAAATTAC-AGATTCCTTTTGTGGAT--TCCATAATCCATGAGGAGAA  
Sb15\_sb08 ATTAAATTACAGATTTGGTTATTTGATCATGATGAAACAATGTTTATAA

Sbay\_c606 -TAT--CTAGT-----TTAATCTATATACATAAATTATAACAT-  
Sb15\_sb08 ATAGTAATAGTGCAAATATTATTAATCTTGTTCAGAT-TATTTTATCATA

Sbay\_c606 CAAAAAATGGAATCTCAAAGTCATC-ATTAAATTTGTAGGTCAATA  
Sb15\_sb08 CATGAATTGATCTGTGCTGAAGACATCTATTGCAACAAAATACGGCTCTT

Sbay\_c606 -CAACTGCATTCCAGCGTTGGATGAGTCGTTTCTACTAAGACATAFAT  
Sb15\_sb08 TCGACTACACATAAACCACTGATGATGGTTTCGACTACGACAAGTAC

Sbay\_c606 ACATATAAGAAGTTCCATTTTCAAGAAGTTCTGGTCTATAGTGTAGTGG  
Sb15\_sb08 ACACATGAGGAGCCCAATTCCAAGAAGTTCTGGTCTATAGTGTAGTGG

Sbay\_c606 TTATCACTTTTCGGTTTTGATCCGGACAACCCCGGTTCGAATCCGGGTAGG  
Sb15\_sb08 TTATCACTTTTCGGTTTTGATCCGGACAACCCCGGTTCGAATCCGGGTAGG

Sbay\_c606 ACCTCATTTTTTTCATCAAAAAA GAAATAATTCGTGTCACAAATTCAAT  
Sb15\_sb08 ACCTCTTTTT----ATCAAAAAATGACAGC--TCGTGTCACAAATTCAAT

Sbay\_c606 GTTGGCGGGCGCATCTTTTTAATGAATGTATTTTTATGGCATTTTAGC  
Sb15\_sb08 ---TGGCAGCCGATCTTTTTAATGAATTCATTTTTATGGCATTTTAGG

Sbay\_c606 ATTTTAGCATTGAGACATATATTATTATTAAACATGAAACGAACACCAA  
Sb15\_sb08 ATTTAAG-----ACACACTATT-----AACCATGAAACGACACCAA

Sbay\_c606 TATAGAAAGCGTAGAAGCACGAGATAAGTCTTGAAGGAAAAATGTCGAA  
Sb15\_sb08 GATAGAACGCACAGAAGCACGAAATAAGTCATCAAGGAAAAATGACAAAT  
→ Sbay\_YHR015W  
→ Spas\_SbYHR015W

Sbay\_c606 TTCTCAAATAATGTACTGAACAATATCTTTTAAATAGCAAGCAAACC  
Sb15\_sb08 TTCTCAAGGTAATGTACTAACAATATCTTTTAAATAGCAAGCAAATC

Sbay\_c606 TGAGGTCAGTTCCTAAAACTAGTTCAAAAGTGAAGTCTGTGAAAGAAAA  
Sb15\_sb08 TGAGATCAGTTCCTAAAACTAGTTCAAAAGTGAAGTCTGTGAAAGAAAA

Sbay\_c606 AGCTTCAAGGTGATGTCCACCGAAACGCAAGAAGTGTAGCAAGGAACTGA  
Sb15\_sb08 AGCTTCAAGGCGATGTCCACCGAAACAAGAACAATAAGCAAAGAGCTGG

Sbay\_c606 CTATAAGCATAAAGATTGCAATTGAAAGAGTTTGAATTTAAAGCCAGA  
Sb15\_sb08 ATATATGCGTAAAGATTGCAATTGAAAGAGTTTGAATTTAAAGCCAGA

Sbay\_c606 CCATTTCAAAAATGATGAATGCAATAGTTCGAGTCAGGAAACGAAAGAG  
Sb15\_sb08 CACATTTCAAAAATGACGAATGCAAGAAAGTATTCAGGAAACGAAAGAG

Sbay\_c606 CAGTTACAAACTCAAAAAAGCTAGTCTCTGGAATGTCAATGTAAAAGA  
Sb15\_sb08 CAGTTACAAACGCAAAAAAGCTGTCTCTAATATTCATAATGTAAAAGA

Sbay\_c606 AAGTTCAGAAAAAAATGTTCAAAGACGCCAAAGGTAGTTCACTTTTTA  
Sb15\_sb08 AAGTTCAGAAAAAAATTTCAAAGGCGATCAAAGGTAGTTCACTTTTCA

Sbay\_c606 TAGGGAAGTTAAAACCGACCGTCACTGAGGAAATGTTGAAGCAAACCTTC  
Sb15\_sb08 TTGGGAAGTTGAAACCGACCGTCACTGAGGAAATGTTGAAGCAAACCTTT

Sbay\_c606 AAAAAGTATCAATCTTTGAATCCGCCAAAGTATGTGCTGATTTTCTCAC  
Sb15\_sb08 AAAAAGTACCAATCTTTGAATCTGCTAAGTATGTGCGGATTTTCTCAC

Sbay\_c606 CAAGAAATCGTTGGGATATGGATATTTAAACTTCAAAGTGAAGGGGATG  
Sb15\_sb08 CAAGAAATCGTTGGGATATGGATATTTAAACTTCAAAGTGAAGAAAGATG

Sbay\_c606 CCGATGCTGCTAAAAAGGATTTAACTATACGTTATTCTTTGGCCAAGAG  
Sb15\_sb08 TAGATTCTGCAAGAAAAGATTACAACTATACGTTATTCTTTGGCCAAGAA

Sbay\_c606 GTTAAAATCATGCCATCAATGAAAAATACCTTATTTAGAAAAATATCGG  
Sb15\_sb08 GTTAAAATCATGCCATCAATGAAAAATACATTATTTAGAAAAATATCGG

Sbay\_c606 AACAAACGTCTTTTTTCAAACCTACCCTAGATAATCTCTACTGACGA  
Sb15\_sb08 AACAAACGTCTTTTTTCAAACCTACCGCTAGATAATCTCTACTGACGA

Sbay\_c606 CCAGATCATTATCTAATAATGATTGAGTACGGGAACGTCCTTTTCATGT  
Sb15\_sb08 CAAGATCATTATCTAATAATGATTGAGTATGGAAACGTACTTTTCATGT

Sbay\_c606 CTTTAGAAAAAGAAAAGACATTGGATTGTTTTATTTTGACAACGATAT  
Sb15\_sb08 CTTCTAGAAAAAGAAAAGAACATTGGATTGTTTTATTTTGACAACGATAT

Sbay\_c606 TTCCGCAAGAAATGTAATTAAGAATATAATAACCAAGAGTTTTTTGGAA  
Sb15\_sb08 TTCCGCAAGAAATGTAATTAAGAATATAATAACCAAGAGTTTTTTGGAA

Sbay\_c606 ATAAAGTTATATGTGGAATACATTTGATAAAGAGGTAAGAAGCAGACCA  
Sb15\_sb08 ATAAAGTTATATGTGGGATACATTTGATAAAGAGGTAAGAAGTAGACCT

Sbay\_c606 GAATTTACTAAAAGGAAAAGATGATTGGTTCCGGACATTGTTATCGAAGA  
Sb15\_sb08 GAATTTACTAAAAGGAAAAGATGATTGGTTCCGGACATTGTTATCGAAGA

Sbay\_c606 TGAATTGTCAATTGGTAAAAATTTGCCAGATAATGTCCTTAAAAACAA  
Sb15\_sb08 TGAATTGTCAATTGGTAAAAATTTGCCAGATAATGTCCTTAAAAACAA

Sbay\_c606 TACTCGTCAAAAATTTACCAACGAAAAACAACAAGAAGAAGTGCTAGAT  
Sb15\_sb08 TACTTGTCAAGAAATTTACCGACGAAAAACAACAAGAAGAAGTGCTAGAT

Sbay\_c606 TTCTTTAGTTCCAGTGGCCCTGTCAAATCTGTATTTATCTCTCGAAAAACA  
Sb15\_sb08 TTCTTTAGTGCCAGTGGTCCCGTCAAATCTGTATTTGCTCTCGAAAAACA

Sbay\_c606 AGGAAATAAGGCACCTAAGGCATTTGTTACATATAAAAAATGAGAAAGATT  
Sb15\_sb08 AGGAAATAAGTCACCTAAGGCATTTGTTACATATAAAAAATGAGAAAGATT

Sbay\_c606 CTAAAAAGGCACAAAATGATCTGGACAAAAGCAGTCTTCAAAGGCCAAACT  
Sb15\_sb08 CTAAAAAGGCACAAAATGATCTGGACAAAAGCAGTCTTCAAAGGCCAAACT

Sbay\_c606 GTTTGGGTAGGTCTGCCAAAGATAAATATGTTTCATAATAAAAAATGAGAT  
Sb15\_sb08 ATTTGGGTGGGCTGCCAAAGATAGATGATTTCATAATAAAAAATGGGAC

Sbay\_c606 AAACAAGAAGACAAAGATTTATTGAAAAGTTTAAGCTTCAATTGTAACA  
Sb15\_sb08 GAGCAAGAAGACAAAGATTTACTTAAAAGTTTAAGCTTCAATTGTAACA

Sbay\_c606 AGGAATTTCTTTCCCAAGTTTGCATACAAGAGAGAATAAAAAATATAGTGAG  
Sb15\_sb08 AGGAATTTCTTTCCCAAGTTTGCATACAAGAGAGAATAAAAAATATAGCGAG

Sbay\_c606 ATTAAAAATCACAATATAACTCATCTAATTGGACATTTTCTGGATATGTT  
Sb15\_sb08 ATTAAAAATCACAATATAACTCATCTAATTGGACATTTTCTGGATATCGT

Sbay\_c606 TGAATGTGTTTCCAGAAATGAAGCTGAAAACATTTAAAAATCTTGATA  
Sb15\_sb08 TGAATGTGTTTCCAGTTGTGAGGCTGAGAAACTATTTAAAAATCTTAGATA

Sbay\_c606 GGAGACTTATTGGAAGTAGCCTGGTTGAAGCATCATGGACAAGAAATTAT  
Sb15\_sb08 GAAGACTCATCGGAAGTAGCCTGGTTGAAGCATCATGGACAAGAAATTAT

Sbay\_c606 GGTACATACATTTGACGAAATTAATTATAATGATAATGACAACAGTAATAT  
Sb15\_sb08 GATCATGTGTTTGAATGAAATGGTTATAATGTAATGACGACAGTAATAT

Sbay\_c606 CTCATTAACGCTGCTCTATGTTGCGTTTTTATTATCCACAGCAGCATC  
Sb15\_sb08 CCGATTAACTAGCTCTATGATGCGTTTTTATTATCCACAGCAGCAAC

Sbay\_c606 CCGCTTACCAGATGAGCCTACCATCACAGTTTCTACAACAAATATCTTCT  
Sb15\_sb08 CTTCTTACCAGATGGACTACCATCACAGTTTCTACAACAAATCTCCCG

Sbay\_c606 TTTCCATCGTATTCGAAATTCATGTACAAACATGAACCTCCTCGTAGCGAC  
Sb15\_sb08 TTTCCATCGTATTCGAAATTCATGTACAAACATGAACCTCCTCGTAGCGAC

Sbay\_c606 GCCAATGAAACCTCATCCTACATTTGACCTAACTTCGAGTAATAGTAACG  
Sb15\_sb08 GCCAATGAAACCTCATCCTGCGTTTGACCTCACTTCAAGTAACAGTAACG

Sbay\_c606 AAAAAAGCAACCTATCAGAGAATAAACAAGGAAATGAAGAGATATTG  
Sb15\_sb08 AAAAAATGCAACCTGTTAGAGAATGTAAACAAGGAAATGAAGAGATATTA

Sbay\_c606 GAGTCATTAAAAAAGTTATAAAGAGAAATTTACGGCACATAAATGTTTC  
Sb15\_sb08 GAGTCATTAAAAAAGTCATAAAGAGAAATCTACGGTACATAAATATTTTC

Sbay\_c606 CGGCTTGAGTAAAGGAGAAAACCTGCGCAGTATTTTCAAGAATTCATTTTTC  
Sb15\_sb08 CGGCTTGAGTAAAGGAGAAAACCTGCGCAGTATTTTCAAGAATTTATTTTTC

Sbay\_c606 AAGTCTTTTGGGATCATGATTCGGAAGGTTAGCTCACTTTTTGTTATTA  
Sb15\_sb08 AAGTCTTTTGGGACCATGATTCGGAAGGCTCGCTCACTTTTTATTATTA

Sbay\_c606 ACAAATACTTCACCAGAATCACAGAAGAACTTACAAAACAAATCATCAA  
Sb15\_sb08 ACAAATACTTCACCAGAATCACAGAAGAGCTTACAAAACAAATCATTAA

Sbay\_c606 GGCAGCTGAAAGTCTTGGATTTTCAATTTGAAT-CTTCTTTGAAAAGAGA  
Sb15\_sb08 GGCAGCTGAAAGTCTTGGATTTTCAATTTAAAACATCTTTGAAAAGAGA  
Sbay\_YHR015W →  
Spas\_non-YHR015W →

Sbay\_c606 GAAA--AAATAAAGTTTACTAATATATACTTTCAACACAAAGAAGATACG  
Sb15\_sb08 GAAATAAAAAAGTTTATTAATATATACTTTGATACAAAGAAGATACG

Sbay\_c606 TATTTCTATAGAAAAGAAATGTCATTTTGCTTGCTATTTATCACATGTT  
Sb15\_sb08 TATTTCTATAGAAAAGAAATGTTATTTTGCTTGCTATTAATTGAATGTT

Sbay\_c606 GAAATAGTTCCACCAGAAAACATCGTGTAGACCCAGCTTTCATACCACT  
Sb15\_sb08 AAAATAGTTC-ATCAGAAAAGACGTCATGTAGACCCAG-TTTCATACCACT

Sbay\_c606 AAGCCGGTAAAGTCGCTATTTACCACATTCAAATTCGAAAGGCTCT-GAT  
Sb15\_sb08 AAGCCGATAAAGTCGTTGTTTACCACCTCAAATTCGAAAGATGATGAT

Sbay\_c606 CATAAGAGCTTGACAAAAGAGACTTCCTAAAATCACTTGAATAACTATAT  
Sb15\_sb08 CATAAAGCTTGACGAAAAGACTTCCTAAGACACCTTGATAATTTTAT

Sbay\_c606 AACTACACGGATTTATAAACATAACTGCATGGCTCCATTGTTCAGTTT  
Sb15\_sb08 AGCTACACGTATTCATTAAACATAACTGCATGAGCTCCATTGTTGCCTT

Sbay\_c606 CAATAATTCGGAAAATGGATATATACAAAAGCAGAAATGTGTATGA-CGT  
Sb15\_sb08 C-----TGGAAAATCAATATATACAAAAGCAGATGTGTATAAGCTT

Sbay\_c606 TATCAAGCTAAGAAACTCGAACATAATTTGCAGGAAAATACCTTCTTTG  
Sb15\_sb08 GTTCGAGCTAAGAAACTCGAACATAATTTGCAGGAAAATACCTTCTTTG

Sbay\_c606 CCATTAAACCTTCCCGTCCACCAATCATTCTGGGAATCTGATTTCTTCAA  
Sb15\_sb08 CCATTGACTTCCCGTCCACCAATCATTCTGGGAATCTGATTTCTTCAA

Sbay\_c606 GATGGTTATAACGTCACCTTCTTAAAAGCCAATCGCCAGATTGCTCTC  
Sb15\_sb08 GATGGTTATAACGTCACCTTCTTAAAAGCTAGATCGCCAGATTGCTCTC

Sbay\_c606 CTGCAAAGTTATAGAGCAACAGCTGTTTGGTTGGCGATTGAAGAGAT  
Sb15\_sb08 CTGCAAAGTTATACAGAGCAACAGCTGTTTGTGAAGTTCGAGTGAAGAGAT

Sbay\_c606 GTGGGTAGCTTGACCCTAGAATGATTATCATCAATCTCTGTTTTAGACAT  
Sb15\_sb08 GTGGCGACTTCGCCCTAGAATGATTATGTCAATGTCAATTTTAGACAT

Sbay\_c606 TTTATGCGATAAGTTATCAGCTTTGTTATCGCCGTGGAAATAGCTTGAC  
Sb15\_sb08 TTTATGCGATGAATTATCGCATTGTTATCGCCGTGAAATAGCTTTGAC

Sbay\_c606 CATATCCTCGGCTATAGCCTCTTTCTTACCATTGCTACCTGTATTTCCT  
Sb15\_sb08 CATGCTTTGGCTATAGCCTCTTTCTTACCATTAGCTACGCTGTATTTCCT

Sbay\_c606 CGAGTGTGTCAAAATCTTTACCAGCATCCAGAACTCTGTGCATACAA  
Sb15\_sb08 CGAGCGTTGTCAATCTTTACTGGCATAACCAGAACTCTGTGCATACAA

Sbay\_c606 ATCATCCTCCCATCGAGTATTGTGCGGGTTTAGTGCCCTGTCTACTT  
Sb15\_sb08 ATCATCTCCCATCGAGTATTAGTGCGGGTTTAGTGCCCTATCTACAT

Sbay\_c606 GTGGGCTCCGTTGTGGCCAGCATTCCTGTGCGGAGATCTTTTCGTAATCA  
Sb15\_sb08 GCGGGCTATATTGTGGCTAGCACTTTATCGGGAGACCTTCCGTAATCA

Sbay\_c606 TAGTCGTCATCGGTGCTGCCAAATTCGGCATCATAATCCGGACCTTCGTA  
Sb15\_sb08 CGCTCGTCATCGGCACTGTGAGATTTCGTCATCATAAACCGGATCTTCATA

Sbay\_c606 ACGACTGCGAGATCCTTGTGACATTCCTCTTCTTGATGATTTTGTGTTG  
Sb15\_sb08 ACGACTGCGAGATCCTTGTGATATTTCCTCTTCTTGACGATTTTGTGTTG

Sbay\_c606 GCGTGTGAGGATTCATCAGCAGAATCAAAGGAGTCTGGAATGTCATCA  
Sb15\_sb08 GCGTGTGAGGATTCATCAGCAGAATCAAAGGAGTCTGGAATGTCATCA

Sbay\_c606 TAGTAGCGGCTATTATTATCGCTGTTAGGTTCGTCATATAAAGTTTCGTT  
Sb15\_sb08 TAGTAACGGCTGTTTTCATCGCTGTTTGGTTCGTCATGATAAATTCGTC

Sbay\_c606 ACCATCATCATATAGCCGGGTCCTGTGAAGTTAAACGCTCTTGATTCTA  
Sb15\_sb08 AGCATCATCATCATGACCGGGACCTGTAAAATTAAACGCTCTTGATTCTA

Sbay\_c606 GGATATGAAGCAAGGGATCTGCTGTGGCGGAACCCTTACTTTACCTGTC  
Sb15\_sb08 GAATATGAAGCAATGGATCTGCTGTGGCGGAACCCTTACTCTACCTGAC

Sbay\_c606 AAAATCATCTTTGAAGTACAATTATCGCCATAGAACTTTCTATTAGCTTC  
Sb15\_sb08 AAAATCATCTTTGAAGTACAGTCATCACCATAGAACTTTCTGTTAGCTTC

Sbay\_c606 CCTTCTTCCAAAGATGGCTGAACCTTCTACAGAGACACCTGCAATAACC  
Sb15\_sb08 CCTCCTCTTAAGATGGCTGAACCTTCCACAGAAACACCTGCGAATAACC

Sbay\_c606 CTTTGCTCTTTGAATAAGCAAAAACAGCTGAGACACCGCCTGTAGATGCA  
Sb15\_sb08 CTTTGCTCTTTGAATAAGCGAAAACAGCCGAGACACCACTGTAGATGCT

Sbay\_c606 GATGCTGCTGCTTCAAGCACTTCTACCAAGAGGACCTGCGGAAACTGATA  
Sb15\_sb08 GATGCTGCTGCTTCCGCACTTCTACCAAGAGGACCTGCGGAAACTGATAC

Sbay\_c606 ATTACCACCTAAGTGATCGTACCGAATTCAGAAAAAGACCTCACCCTT  
Sb15\_sb08 ATTACCACCTAGAGTGATGTACCGAATTCAGAAAAAGACCTCACCCTT

Sbay\_c606 CCTCAGAATTTAAAATGAAGACAATAATCAGTCAGTTCAATACCGACCATA  
Sb15\_sb08 CCTCAGAATTTAAAATAAAGACGAAATCAGTCAGTTCAATACCGACCATA

Sbay\_c606 CCACCGGCACCGGCACCCGCCATAGCAATAGCGGAAGGAGCAGACCATGA  
Sb15\_sb08 CCACCGGCACCGGCACCCGCCATAGCAATAGCGGAAGGAGCAGACCATGA

Sbay\_c606 ACCATCTTTCAATCTGGCCACAATCACACCCGAACCAGCTCTTCTTCTGAAA  
Sb15\_sb08 ACCATCTTTCAATCTGGCCACAATCACACCCGAACCAGCCCTCCCGAAA

Sbay\_c606 ATAAGAAACCTGCCTTCAAACCGTTATAATGGCTAGACCTTTGGCTTTT  
Sb15\_sb08 ATAAGAAACCTGCCTTCAAACCGTAATAATGGCTAGACCTTTGGCTTTT

Sbay\_c606 TTTAGCACATAAGGTGGAATGACCTGATCTGCTCCAAACACTTGATTTGG  
Sb15\_sb08 TTTAACACATACGGTGAATAACCTGATCTGCTCCAAACACTTGATTTGG



1-4-a) ScIII > ScIII

```

      ← Scer_YCR038C
      ← Spas_ScYCR038C
Scer_chr03  .... GGATTTT TTTGGGACGATATTGT CATTATAGGGCAGTGTGTGAC
Sc03_Sc03  .... GGATTTT TTTGGGACGATATTGT CATTATAGGGCAGTGTGTGAC
Sbay_chr03  .... GGATTTT CTTTGGGACGATATTGT TGT TATGATT C TGTGTGTGGC
      ← Sbay_YCR038C

Scer_chr03  TTATGAAT TGT TGTAG AAGGACGTCTGTGATGTTGGAGATA TGTATTTTG
Sc03_Sc03  TTATGAAT TGT TGTAGGAGGACGTCTGTGATGTTGGAGATA TGTATTTTG
Sbay_chr03  TTAAGAACTGTAT TAGGAGTACATCGGTAATTTTGGAAAGGTGTGTTTTG

Scer_chr03  TTAACTCTTCTTGAGACGATTTGGCCCTGGATAGCGAAGCGT GCGGTTAC
Sc03_Sc03  TTAACTCTTCTTGAGACGATTTGGCCCTGGATAGCGAAGCGT GCGGTTAC
Sbay_chr03  TTTACTCTTCTTGT TACTATTTGGCCCTGAATAGCGAAGCGTACGGTTAC

Scer_chr03  AAATAGGTCGTCTTGTTC AAGAAGGTAGGCCAGGACATTATCTATCAGTA
Sc03_Sc03  AAATAGGTCGTCTTGTTC AAGAAGGTAGGCCAGGACATTATCTATCAGTA
Sbay_chr03  AAAT TGGTCGTCTTGTTC AAGAAGGTAGGCCAGGACATTATCTATCAGTA

Scer_chr03  CAAACATCTTAGTAGTGTCTGAGGAGAGGGTTGATTGTTTATGTATTTTT
Sc03_Sc03  CAAACATCTTAGTAGTGTCTGAGGAGAGGGTTGATTGTTTATGTATTTTT
Sbay_chr03  CAAACATCTTAGTAGTGTCTGAGGAGAGGGTTGATTGTTTATGTATTTTT
      Sbay_YCR038C ←

Scer_chr03  GCGAA-----ATATATATATATATATTTCTACACAGA
Sc03_Sc03  GCGAA-----ATATATATATATATATTTCTACACAGA
Sbay_chr03  GTTTATGTATATGTATATATATATATATATATATATATATTTCTACACAGA

      Scer_YCR038C ←
      Spas_ScYCR038C ←
Scer_chr03  TATATACATA TTTGTTTTTCGGGCTCATTCTTTCTTCTTTGCCAGAGGCT
Sc03_Sc03  TATATACATA TTTGTTTTTCGGGCTCATTCTTTCTTCTTTGCCAGAGGCT
Sbay_chr03  TATATACATA ATTGTTTTTCGGGCTCATTCTTTCTTCTTTGCCAGAGGCT
      → Scer_MATalpha2
      → Spas_MATalpha2
      → Sbay_YCL067C

Scer_chr03  CACCGCTCAAGAGGTCCGCTAATTCTGGAGCGATTGTTATGTTTTTTCT
Sc03_Sc03  CACCGCTCAAGAGGTCCGCTAATTCTGGAGCGATTGTTATGTTTTTTCT
Sbay_chr03  CACCGCTCAAGAGGTCCGCTAATTCTGGAGCGATTGTTATGTTTTTTCT

Scer_chr03  TTTCTTCTTCTATTTCGAAACCCAGTTTTTGTATTGAATGCGAGATAAACT
Sc03_Sc03  TTTCTTCTTCTATTTCGAAACCCAGTTTTTGTATTGAATGCGAGATAAACT
Sbay_chr03  TTTCTTCTTCTATTTCGAAACCCAGTTTTTGTATTGAATGCGAGATAAACT

Scer_chr03  GGTATTCCTCATTAGATTCTCTAGGCCCTGGTATCTAGATATGGGTTCT
Sc03_Sc03  GGTATTCCTCATTAGATTCTCTAGGCCCTGGTATCTAGATATGGGTTCT
Sbay_chr03  GGTATTCCTCATTAGATTCTCTAGGCCCTGGTATCTAGATATGGGTTCT

Scer_chr03  CGATGTTCTTTGCAAACCAACTTTCTAGTATTCGGACATTTCTTTTGTGA
Sc03_Sc03  CGATGTTCTTTGCAAACCAACTTTCTAGTATTCGGACATTTCTTTTGTGA
Sbay_chr03  CGATGTTCTTTGCAAACCAACTTTCTAGTATTCGGACATTTCTTTTGTGA

Scer_chr03  AACCGGTGTCCTCTGTAAGGTTTAGTACTTTTGTATCATATCTTGAGT
Sc03_Sc03  AACCGGTGTCCTCTGTAAGGTTTAGTACTTTTGTATCATATCTTGAGT
Sbay_chr03  AACCGGTGTCCTCTGTAAGGTTTAGTACTTTTGTATCATATCTTGAGT

Scer_chr03  TACCACATTAATACCAACCCATCCGCCGATTTATTTTTCTGTGTAAGTT
Sc03_Sc03  TACCACATTAATACCAACCCATCCGCCGATTTATTTTTCTGTGTAAGTT
Sbay_chr03  TACCACATTAATACCAACCCATCCGCCGATTTATTTTTCTGTGTAAGTT

Scer_chr03  GATAATTACTTCTATCGTTTTCTATGCTGCGCATTCTTTGAGTAATACA
Sc03_Sc03  GATAATTACTTCTATCGTTTTCTATGCTGCGCATTCTTTGAGTAATACA
Sbay_chr03  GATAATTACTTCTATCGTTTTCTATGCTGCGCATTCTTTGAGTAATACA

```

Scer\_chr03 GTAATGGTAGTAGTGAGTTGAGATGTTGTTTGAACAACCTTCTTCTCCTC  
Sc03\_Sc03 GTAATGGTAGTAGTGAGTTGAGATGTTGTTTGAACAACCTTCTTCTCCTC  
Sbay\_chr03 GTAATGGTAGTAGTGAGTTGAGATGTTGTTTGAACAACCTTCTTCTCCTC

Scer\_chr03 ATCACTAATCTTACGGTTTTTGTGGCCCTAGATAAGAATCCTAATATAT  
Sc03\_Sc03 ATCACTAATCTTACGGTTTTTGTGGCCCTAGATAAGAATCCTAATATAT  
Sbay\_chr03 ATCACTAATCTTACGGTTTTTGTGGCCCTAGATAAGAATCCTAATATAT

Scer\_chr03 CCCTTAATTCAACTTCTTCTTCTGTTGTTACTCTCTGGTAACTTAGGT  
Sc03\_Sc03 CCCTTAATTCAACTTCTTCTTCTGTTGTTACTCTCTGGTAACTTAGGT  
Sbay\_chr03 CCCTTAATTCAACTTCTTCTTCTGTTGTTACTCTCTGGTAACTTAGGT

Scer\_chr03 AAATTACAGCAAATAGAAAAGAGCTTTTTATTTATGTCTAGTATGCTGGA  
Sc03\_Sc03 AAATTACAGCAAATAGAAAAGAGCTTTTTATTTATTTCTAGTATACTTGA  
Sbay\_chr03 AAATTACAGCAAATAGAAAAGAGCTTTTTATTTATGTCTAGTATACTTGA

Scer\_chr03 TTTAAACTCATCTGTGATTTGTGGATTTAAAAGGTCTTTAATGGGTATTT  
Sc03\_Sc03 TTTGAACTCATCTGTAATTTGTGGATTTAAAAGGTCTTTAATGGGTATCT  
Sbay\_chr03 TTTGAACTCATCTGTGATTTGTGGATTTAAAAGGTCTTTAATGGGTATCT

Scer\_MATalpha2 ←  
Spas\_MATalpha2 ←  
Scer\_chr03 TATTCATTTTCTTGTCTTATCTTCTTTTCTTGGCCACTTCTAAGC  
Sc03\_Sc03 TATTCATTTGTCTTGGTTATCCTCTCTGTTTCTTGGCTGCCCAATGC  
Sbay\_chr03 TATTCATTTGTCTTGTCTTATCCTCTTTGTTCTTGGCTGCCCAACGC  
Sbay\_YCL067C ←

Scer\_chr03 TGATTTCAATCTCTCCTTTATATATATTTTAAAGTTCCAACATTTTATGT  
Sc03\_Sc03 TAATTTTATCTCTCCTTTATATATATTTTCATGTTGCAACATTTTATGT  
Sbay\_chr03 TAATTTTATCTCTCCTTTATATATATTTTCATGTTGCAACATTTTATGT

Scer\_chr03 TTCAAAACATTAATGATGTCTGGGTTTTGTTGGGATGCAATTTATTGCT  
Sc03\_Sc03 TTCAAAACAT-AATGCGTCTGGGTTTTGTTGGGATGCAATTTATTGCT  
Sbay\_chr03 TTCAAAACAT-AATGCGTCTGGGTTTTGTTGGGATGCAATTTATTGCT

Scer\_chr03 TCCCAATGTAGAAAAGTACATCATATGAAACAACCTTAAACTCTTAACTAC  
Sc03\_Sc03 TCCCAATGTAGAAAAGTACATCATTTGAAACAACCTTAAACTCTTAAACAT  
Sbay\_chr03 TCCCAATGTAGAAAAGTACATCATTTGAAACAACCTTAAACTCTTTAGCAT

Scer\_chr03 TTCTTT-TAACCTTCACTTTT-ATGAAATGTATCAACCATATATAATAA  
Sc03\_Sc03 TTCTTCACTAATTTTCACTCAAGCAAGAACTCTATCGAGTATATATAATAA  
Sbay\_chr03 TTCTTCACTAATTTTCACTCAAGCAAGAACTTTATCGAGTATATATAATAA

Scer\_MATalpha1 →  
Spas\_MATalpha1 →  
Scer\_chr03 CTTAATAAGCG--ACATTCACAAATATGTTTACTTTCGAAGCCTGCTTTCAA  
Sc03\_Sc03 CTCAATACCTTCACAATCCTAAGATGTTCACTTCTAAGCCTGCCTTCAG  
Sbay\_chr03 CCAATAAGCCCAATAATACTAAGATGTTCACTCTAAACCTGCCTTCAG  
Sbay\_YCL066W →

Scer\_chr03 AATTAGAACAAGCATCCAAATCATACAGAAACACAGCGGTTTCAAAAA  
Sc03\_Sc03 AATCAAGAACAAGACCTCTAAATCACATAAAAAACCGCATACCAAAAA  
Sbay\_chr03 AATCAAGAACAAGACCTCTAAATCACATAGAAAACAGACATGCTAAAA

Scer\_chr03 AGCTGAAGAAAACGTC TAGCTGAGCATGTGAGGCCAAGCTGCTTCAAT  
Sc03\_Sc03 AAGTGAAGGTAAGCGTATAGCAAACTGATAAATCCAAGTGTTTTTAAT  
Sbay\_chr03 AAGTGAAGGTAAGCGTATAGCAAACTGATAAATCCAAGTGTTTTTAAT

Scer\_chr03 ATTATTCGACCACTCAAGAAAATATCCAGATTCTGTTCCTTCCTCTCG  
Sc03\_Sc03 ATTATTCGTCCTCACTAAAACAAATTCAGCTCCTTCACCTTT  
Sbay\_chr03 ATTATTCGACCACTTAAAGAAAACATTCAAATTCAGCTCCTTCACCTTT



Scer\_chr03 ATTTTAAATAAAATCCAAATTCACAGGATAGCGTCTGGAAATCAAATA  
 Sc03\_Sc03 ATTTTAAAGAAAATCCAACTATATAGAATAGCGTCTGGAAATCAAATG  
 Sbay\_chr03 ATTTCTAAAGAAAATCCAACTATATAGAATAGCATCCGGAAATCAAATA

Scer\_chr03 CTCAGTTTCGACAGTTC AATAAGACATCTA TAAATCTTCAAAGAAATAT  
 Sc03\_Sc03 TACAATGCCGACAGTCTAGAAAAGCATCATTAACATCATCTAAGAAGTAT  
 Sbay\_chr03 TTCAATGCCGACAGTCTGAGAAAAGCATCAATAACACCATCTAAGAAGTAT

Scer\_chr03 TTAAACTCATTTATGGCTTTTAGAGCATAT TACTCACAGTTTGGCTCCGG  
 Sc03\_Sc03 CTAAATCTTTTCATGGCATTAGAGCTTACTATTCTCAGTTTGGCGCCGG  
 Sbay\_chr03 CTAAATCTTTTCATGGCATTAGAGCTTACTATTCTCAGTTTGGCGCCGG

Scer\_chr03 TGTAAAACAAAATGCTCTGTCTTCTCTGCTCGCTGAAGAATGGCACGCGG  
 Sc03\_Sc03 TGTTAAGCAGAACATCTTGTCTTCTTACTTTCTGAGGAATGGCACGCGG  
 Sbay\_chr03 TGTTAACAGAACATCTTGTCTTCTTACTTTCTGAAGAATGGCACGCGG

Scer\_chr03 ACAAAATGCAGCACGGAATATGGGACTACTTCGCGCAACAGTATAATTTT  
 Sc03\_Sc03 ACAAAATGCAGCACGGAATATGGGACTACTTCGCGCAACAGTATAATTTT  
 Sbay\_chr03 ACAAAATGCAGCACGGAATATGGGACTACTTCGCGCAACAGTATAATTTT

Scer\_chr03 ATAAACCCTGGTTTTGGTTTTGTAGAGTGGTTGACGAATAATTATGCTGA  
 Sc03\_Sc03 ATAAACCCTGGTTTTGGTTTTGTAGAGTGGTTGACGAATAATTATGCTGA  
 Sbay\_chr03 ATAAACCCTGGTTTTGGTTTTGTAGAGTGGTTGACGAATAATTATGCTGA

Scer\_chr03 AGTACGTGGTGACGGATATTGGGAAGATGTGTTGTACATTGGCCTTAT  
 Sc03\_Sc03 AGTACGTGGTGACGGATATTGGGAAGATGTGTTGTACATTGGCCTTAT  
 Sbay\_chr03 AGTACGTGGTGACGGATATTGGGAAGATGTGTTGTACATTGGCCTTAT

→ Scer\_YCR041W  
 → Spas\_ScYCR041W  
 → Sbay\_ORF(not annotated)

Scer\_MATalpha1 →  
 Spas\_MATalpha1 →  
 Scer\_chr03 AGAGTGTGGTCGTGGCGGAGGTTGTTTATCTTTTCGAGTACTGAATGTTGT  
 Sc03\_Sc03 AGAGTGTGGTCGTGGCGGAGGTTGTTTATCTTTTCGAGTACTGAATGTTGT  
 Sbay\_chr03 AGAGTGTGGTCGTGGCGGAGGTTGTTTATCTTTTCGAGTACTGAATGTCGT  
 Sbay\_YCL066W →

Scer\_chr03 CAGTATAGCTATCCTATTTGAAACTCCCCATCGTCTTGCTCTTGTCCCA  
 Sc03\_Sc03 CAGTATAGCTATCCTATTTGAAAATCCCCATCGTCTTGCTCTTGTCCCA  
 Sbay\_chr03 CAGTATATCTATCCTATTTACAAATCCCCATCTCTTGCTCTTGTCTCA

Scer\_chr03 ATGTTTGTTTATACACTCATATGGCTATACCCTTATCT----ACTTGCCT  
 Sc03\_Sc03 ATGTTTGTTTATACACTCATATGGCTATACCCTTATCT----ACTTGCCT  
 Sbay\_chr03 ATGTTTGTTTATATAATCCATATGCTATGTGTTTATGTTTATATATACCT

Scer\_chr03 CTTTTGTTTATGCTATGTATTTGTATAAAAATATGATATTACTCA.....  
 Sc03\_Sc03 CTTTTGTTTATCTCTATGTATTTGTATAAAAATATGATATTACTCA.....  
 Sbay\_chr03 -TACTGTGTACATATATGTATATATGCTTG-TCGTATATTAATCT.....

Scer\_YCR041W →  
 Spas\_ScYCR041W →  
 Sbay\_ORF(not annotated) →

1-4-b) SbIII > ScIII

Scer\_chr03 .....GGCCGTTCTCATGCTGTCGAGGATTTTTTTGGGACGATATTGTC  
 Sb03\_Sc03 .....GGCCGTTCTCATATATTCGAGGATTTTTTTGGGACGATATTGTT  
 Sbay\_chr03 .....GGCCGTTCTCATATATTCGAGGATTTTC TTTGGGACGATATTGTT

← Spas\_SbYCR038C  
 ← Sbay\_YCR038C

Scer\_chr03 ATTATAGGGCAGTGTGTGACTTATGAATGTTGTGTAGAGGACGCTGTGTA  
 Sb03\_Sc03 GTTATGATTCTGTGTGTGGCTTAAGAACGTATTAGGAGTACATCGGTAA  
 Sbay\_chr03 GTTATGATTCTGTGTGTGGCTTAAGAACGTATTAGGAGTACATCGGTAA



Scer\_chr03 ATAAGAATCCTAATATATCCCTTAATTCAACTTCTTCTTCTGTTGTTACA  
Sb03\_sc03 ATAAGAATCCTAATATATCCCTTAATTCAACTTCTTCTTCTGTTGTTACA  
Sbay\_chr03 ATAAGAATCCTAATATATCCCTTAATTCAACTTCTTCTTCTGTTGTTACA

Scer\_chr03 CTCTCTGGTAACTTAGGTAAATTACAGCAAATAGAAAAGAGCTTTTTATT  
Sb03\_sc03 CTCTCTGGTAACTTAGGTAAATTACAGCAAATAGAAAAGAGCTTTTTATT  
Sbay\_chr03 CTCTCTGGTAACTTAGGTAAATTACAGCAAATAGAAAAGAGCTTTTTATT

Scer\_chr03 CTTGATTTTTGTTCTTTTCGGGGAAACTGTATAAAACTTCCAAAAGGAAA  
Sb03\_sc03 CTTGATTTTTGTTCTTTTCGGGGAAACTGTATAAAACTTCCAAAAGGAAA  
Sbay\_chr03 ATCGATTTTTGTAGATTCGGGAAAACCTATAAAACTGACAAACA-GGAAA

Scer\_chr03 AGTAAAACAATACATCTCCTTATATCAAAGAAAATCAAGAAGGACAACAT  
Sb03\_sc03 AGTAAAACAATACATCTCCTTATATCAAAGAAAATCAAGAAGGACAACAT  
Sbay\_chr03 AGTGAACAAAGACATCTCCTTGAAGCAAAGAAAAGCAAGAAAGACAACAT

Scer\_MATa1 →  
Spas\_MATa1 →

Scer\_chr03 GGATGATATTTGTAGTATGCGGAAAACATAAACAGAACTCTGTTTAAACA  
Sb03\_sc03 GGATGATATTTGTAGTATAGCGGAAAACATAAACAGAACTCTGCTTAAACA  
Sbay\_chr03 GGACGATATTTGTAGTATAGCTGAAAACATTAACAGAGCTCTGTTTAAAAA

Scer\_chr03 TTCTAGGTACTGAGATTGATGAAATCAATCTCAATACTAAATAATCTTTAT  
Sb03\_sc03 TTCTAGGTACTGAGATTGATGAAATCAATCTCAATACTAAATAATCTTTAT  
Sbay\_chr03 TTTTAGGTACTGAGATTGATGAAATCAATCTCAATACTAAATAATCTTTAT

Scer\_chr03 AATGTATGTTT--TCATTTCAAGGATAGCCTTTGAATCAATTTACTAACA  
Sb03\_sc03 AATGTATGTTT--TCATTTCAAGGATAGCCTTTGAATCAATTTACTAACA  
Sbay\_chr03 AAAGTATGTTCAATCATT--AGAAAGAGTTTAAACGGCT-ACTAACA

Scer\_chr03 ATACTTCAGTTTATAATGGAAAAGTAATTTGACTAAAGTAGAGCAACATAC  
Sb03\_sc03 ATACTTCAGTTTATAATGGAAAAGTAATTTGACTAAAGTAGAGCAACATAC  
Sbay\_chr03 ACAGTTTAGTTTGTATGGAAAAGCAATTTAAACAAAAGTAGAACAAACGCAC

Scer\_chr03 ATTACACAAAATATTTCTAACAAATAGGTTAGAAATATACCACCACATTA  
Sb03\_sc03 ATTACACAAAATATTTCTAACAAATAGGTTAGAAATATACCACCACATTA  
Sbay\_chr03 TCTACAAAAGAAATATTTCTAACAAACAGGTTAGAAATATATCACGGATCA

Scer\_chr03 AAAAAAGAGAAGAGCCCAAAGGGAAAATCATCAATATCACCCCAAGCACGG  
Sb03\_sc03 AAAAAAGAGAAGAGCCCAAAGGGAAAATCATCAATATCACCCCAAGCACGG  
Sbay\_chr03 AGAAAGAAAAGAAATCACAAAGGAAAATCTCAATATCACCTCAAGCACGG

Scer\_chr03 GCATTTT TAGAACAGGTTTTT TAGAAGAAAGCAAAGCCTTAATTTCCAAGGA  
Sb03\_sc03 GCATTTT TAGAACAGGTTTTT TAGAAGAAAGCAAAGCCTTAATTTCCAAGGA  
Sbay\_chr03 GCATTTT TAGAACAGGTTTTT CAGAGAAAGCAAAGTCTTAATTTCCAAGGA

Scer\_chr03 AAAAGAAGAAGTTGCAAAGAAATGTGGCATTACTCCACTTCAAGTAAGAG  
Sb03\_sc03 AAAAGAAGAAGTTGCAAAGAAATGTGGCATTACTCCACTTCAAGTAAGAG  
Sbay\_chr03 AAAAGAAGAAGTAGCAAAGAAATGTGGCATTACTGCCACTTCAAGTAAGAG

Scer\_chr03 TTTGGGTATGTAATATGAGAATCAAACCTAAATATATCCTATACTAACAA  
Sb03\_sc03 TTTGGGTATGTAATATGAGAATCAAACCTAAATATATCCTATACTAACAA  
Sbay\_chr03 TCTGGGTATGTAACAAGTGAATCAATCTCTAAATATTTCTTATACTAACAA

Scer\_MATa1 →  
Spas\_MATa1 →

Scer\_chr03 TTTGTAGTTCATAAATAAACGTATGAGATCTAAATAAATTCGTTTTCAAT  
Sb03\_sc03 TTTGTAGTTCATAAATAAACGTATGAGATCTAAATAAATTCGTTTTCAAT  
Sbay\_chr03 TTTGTAGTTCATAAATAAACGTATGAGATCTAAATAAATTCGTTTTCAAT

Scer\_chr03 GATTAAAATAGCATAGTCGGGTTTTTCTTTTAGTTTCAGCTTTCCGCAAC  
Sb03\_sc03 GATTAAAATAGCATAGTCGGGTTTTTCTTTTAGTTTCAGCTTTCCGCAAC  
Sbay\_chr03 GACTAAAATAGCATATTCGCGGTTTTTCTTTTAGCTTCAGCTTTCCGCAAC

Scer\_chr03 AGTAAATTTTATAAACCTGGTTTTGGTTTTGTAGAGTGTTGACGAAT  
Sb03\_sc03 AGTATAATTTTATAAACCTGGTTTTGGTTTTGTAGAGTGTTGACGAAT  
Sbay\_chr03 AGTATAATTTTATAAACCTGGTTTTGGTTTTGTAGAGTGTTGACGAAT

Scer\_chr03 AATTATGCTGAAGTACGTGGTGACGGATATTGGGAAGATGTGTTGTACA  
Sb03\_sc03 AATTATGCTGAAGTACGTGGTGACGGATATTGGGAAGATGTGTTGTACA  
Sbay\_chr03 AATTATGCTGAAGTACGTGGTGACGGATATTGGGAAGATGTGTTGTACA

Scer\_YCR041W →  
Spas\_ScYCR041W →

Scer\_chr03 TTTGGCCTTATAGAGTGTGGTCGTGGCGGAGGTTGTTTATCTTTCGAGTA  
Sb03\_sc03 TTTGGCCTTATAGAGTGTGGTCGTGGCGGAGGTTGTTTATCTTTCGAGTA  
Sbay\_chr03 TTTGGCCTTATAGAGTGTGGTCGTGGCGGAGGTTGTTTATCTTTCGAGTA

Scer\_chr03 CTGAATGTTGTCAGTATAGCTATCCTATTTGAAACCTCCCATCGTCTTGC  
Sb03\_sc03 CTGAATGTTGTCAGTATAGCTATCCTATTTGAAATCCCATCGTCTTGC  
Sbay\_chr03 CTGAATGTCGTCAAGTATAGCTATCCTATTTACAAATCCCATTCCTTGC

Scer\_chr03 TCTTGTCCCAATGTTTGTTTATACACTCATATGGCTATACCCTTATCTA  
Sb03\_sc03 TCTTGTCCCAATGTTTGTTTATACACTCATATGGCTATACCCTTATCTA  
Sbay\_chr03 TCTTGTCTCAATGTTTGTTTACATAATCTATGCTATGTGTTTATGT-

Scer\_chr03 CTTGCCCTTTTGTATGTCATGTATTGTATAAAATATGATA.....  
Sb03\_sc03 CTTGCCCTTTTGTATGTCATGTATTGTATAAAATATGATA.....  
Sbay\_chr03 -TTATAATACC-TTACTGTGACATACATGTATACGCCTGTATT.....

Scer\_YCR041W →  
Spas\_ScYCR041W →

1-5) ScVII / SbvII

← Scer\_YGL173C  
 ← Spas\_ScYGL173C  
 Scer\_chr07 ..... AAAATTCTAAATGATCTTTATGTCCTAAGTCCTTAGGTAAGTCTA  
 Sc07\_Sc07 ..... AAAATTCTAAATGATCTTTATGTCCTAAGTCCTTAGGTAAGTCTA  
 Sc07\_Sb07 ..... AAAATTCTAAATGATCTTTATGTCCTAAGTCCTTAGGTAAGTCTA  
 Sbay\_c674 ..... AAAATTCAAATGATCTTTAACAATCAATCAATCCTTAGGCAACTCTA  
 ← Spas\_ScYGL173C/SbYGL173C  
 ← Sbay\_YGL173C

Scer\_chr07 AAGTTGGAATTTCTTCACTGGTAAATCAGGCGATAATTTTCTGTAAT  
 Sc07\_Sc07 AAGTTGGAATTTCTTCACTGGTAAATCAGGCGATAATTTTCTGTAAT  
 Sc07\_Sb07 AAGTTGGAATTTCTTCACTGGTAAATCAGGCGATAATTTTCTGTAAT  
 Sbay\_c674 AGGTCGGAATTTTCTGTCAGGTAATCAGGCGATAATTTTCTGTAAT

Scer\_chr07 TGCTCCATCAACCATGGTTTTATACTTCCAATTAATTTCTTCTGTTGTTT  
 Sc07\_Sc07 TGCTCCATCAACCATGGTTTTATACTTCCAATTAATTTCTTCTGTTGTTT  
 Sc07\_Sb07 TGCTCCATCAACCATGGTTTTATACTTCCAATTAATTTCTTCTGTTGTTT  
 Sbay\_c674 TGCTCCATTAACCAAGGTTTTATCTTCCGATCAGTTTCTTCTGTTGTTT

Scer\_chr07 TACCAGTAATTTTACCAACCCTCTGTCTTTTCTTTCCACCCTCCAAAG  
 Sc07\_Sc07 TACCAGTAATTTTACCAACCCTCTGTCTTTTCTTTCCACCCTCCAAAG  
 Sc07\_Sb07 TACCAGTAATTTTACCAACCCTCTGTCTTTTCTTTCCACCCTCCAAAG  
 Sbay\_c674 AATCAATAATTTCTTACCAACCCTTGTCTTTTCTTTCCACCCTTCTAAAG

Scer\_chr07 AAATATTCTCTAATTGCTTGTGTAACCACTCAACGTCTATATCATCCTTT  
 Sc07\_Sc07 AAATATTCTCTAATTGCTTGTGTAACCACTCAACGTCTATATCATCCTTT  
 Sc07\_Sb07 AAATATTCTCTAATTGCTTGTGTAACCACTCAACGTCTATATCATCCTTT  
 Sbay\_c674 AAATGTTTCTAGTTGTTTGTGTAACCACTCAACATCTATATCATCCTTC

Scer\_chr07 TCGAAATTTAATAACTCAAAATGAGACAGATAATTTAACGAGACACCTAA  
 Sc07\_Sc07 TCGAAATTTAATAACTCAAAATGAGACAGATAATTTAACGAGACACCTAA  
 Sc07\_Sb07 TCGAAATTTAATAACTCAAAATGAGACAGATAATTTAACGAGACACCTAA  
 Sbay\_c674 TCGAAATTTAACAACTCGAATTGAGACAGTAGTCCAGCCAGACTCCTAA

Scer\_chr07 TCTCTTTAAATTTATTTTACCATGTTTCATTAATGTAGCCATCAGTATGTA  
 Sc07\_Sc07 TCTCTTTAAATTTATTTTACCATGTTTCATTAATGTAGCCATCAGTATGTA  
 Sc07\_Sb07 TCTCTTTAAATTTATTTTACCATGTTTCATTAATGTAGCCATCAGTATGTA  
 Sbay\_c674 TCTTCTCAGTTTATTTTCCGTTGTTTCATTAATGTAGCCATCGGTATGTA

Scer\_chr07 AAAGAGCTTCTTTGAACTTTGTAACAACGGGAAATGCTCCTTTGTTA  
 Sc07\_Sc07 AAAGAGCTTCTTTGAACTTTGTAACAACGGGAAATGCTCCTTTGTTA  
 Sc07\_Sb07 AAAGAGCTTCTTTGAACTTTGTAACAACGGGAAATGCTCCTTTGTTA  
 Sbay\_c674 AGAGAGCTTCTTTGAAAGTTTGTAAACAGGACAGGAAAGCACCTTTATTT

Scer\_chr07 AGGTGCAAACTGGCAAATTTGGCAAGAAATCATTACCAATGACGAACAT  
 Sc07\_Sc07 AGGTGCAAACTGGCAAATTTGGCAAGAAATCATTACCAATGACGAACAT  
 Sc07\_Sb07 AGGTGCAAACTGGCAAATTTGGCAAGAAATCATTACCAATGACGAACAT  
 Sbay\_c674 AGGTGTAATCAGGCAAATTTGGCAAGAAATCATTACCAATGACGAACAT

Scer\_chr07 GACAAGAATAAAATCATCCAAATACGTTCAAATGTATTCAAATTGCA  
 Sc07\_Sc07 GACAAGAATAAAATCATCCAAATACGTTCAAATGTATTCAAATTGCA  
 Sc07\_Sb07 GACAAGAATAAAATCATCCAAATACGTTCAAATGTATTCAAATTGCA  
 Sbay\_c674 GACAAGAATAAAATCATCCAAAGATACGTTCAAATCGTACTCAAATTGCA

Scer\_chr07 TTTTCATCGGCAATTTCTTTGAATTCCAACTCCATGTATTCTCTTAATAAA  
 Sc07\_Sc07 TTTTCATCGGCAATTTCTTTGAATTCCAACTCCATGTATTCTCTTAATAAA  
 Sc07\_Sb07 TTTTCATCGGCAATTTCTTTGAATTCCAACTCCATGTATTCTCTTAATAAA  
 Sbay\_c674 TTTTCATCGGCGATTTCTTTGAATTTCAACTCCATGTATTCTCTCAATAAA

Scer\_chr07 GAAAGATGTAATAAGTAGAAATTTTGATGTTCAAGCGATTTTTTTTCACT  
 Sc07\_Sc07 GAAAGATGTAATAAGTAGAAATTTTGATGTTCAAGCGATTTTTTTTCACT  
 Sc07\_Sb07 GAAAGATGTAATAAGTAGAAATTTTGATGTTCAAGCGATTTTTTTTCACT  
 Sbay\_c674 GAAAGGTGTAAGAAAGAAAGAAATTTTGATGTTCTAGAGATTTTTTTTCTGCT

Scer\_chr07 ATTTCTTCTACCAAATGTCACCTTCTTCTCAATAACGCAAATGTGGCC  
Sc07\_Sc07 ATTTCTTCTACCAAATGTCACCTTCTTCTCAATAACGCAAATGTGGCC  
Sc07\_Sb07 ATTTCTTCTACCAAATGTCACCTTCTTCTCAATAACGCAAATGTGGCC  
Sbay\_c674 ATTCCTTCTCCAAACCTGACTTCTTCTTAATAGAGCAAATGAGGCC

Scer\_chr07 CATGAGTAGACAAACCAGCATAAATCAAATCTGCGTCAAGACCGTAAATA  
Sc07\_Sc07 CATGAGTAGACAAACCAGCATAAATCAAATCTGCGTCAAGACCGTAAATA  
Sc07\_Sb07 CATGAGTAGACAAACCAGCATAAATCAAATCTGCGTCAAGACCGTAAATA  
Sbay\_c674 CGTGAGTAGATAAACCTAGCATGATCAAATCGCATCAAGACCAATAAATA

Scer\_chr07 CAATGTCTCGTATTCTGGTTGAAATCCTTTGGGATTTTAAATGCCTTAT  
Sc07\_Sc07 CAATGTCTCGTATTCTGGTTGAAATCCTTTGGGATTTTAAATGCCTTAT  
Sc07\_Sb07 CAATGTCTCGTATTCTGGTTGAAATCCTTTGGGATTTTAAATGCCTTAT  
Sbay\_c674 CAATGTCTCGTATTTGGTTAAAATCCTTCTGTGATTTTAAATGCCTTAT

Scer\_chr07 AAAGTTCATGATCTTGTGTTACACCTCACCTGGAACCTCATGGCCAGAAA  
Sc07\_Sc07 AAAGTTCATGATCTTGTGTTACACCTCACCTGGAACCTCATGGCCAGAAA  
Sc07\_Sb07 AAAGTTCATGATCTTGTGTTACACCTCACCTGGAACCTCATGGCCAGAAA  
Sbay\_c674 GAAATTCATGATTTGTGCTCACCTCACCTGGAACCTCATGGCCAGAAA

Scer\_chr07 ATATGATTGCACTTCCCTCCATTTGGAATCGTTAGAAATCTTGTCTGTA  
Sc07\_Sc07 ATATGATTGCACTTCCCTCCATTTGGAATCGTTAGAAATCTTGTCTGTA  
Sc07\_Sb07 ATATGATTGCACTTCCCTCCATTTGGAATCGTTAGAAATCTTGTCTGTA  
Sbay\_c674 ATATAATTGTACTTCTCTCCACTTAGAATCGTTAGAGATCTTGTCTGTA  
Sc07 > sb07

Scer\_chr07 ATAAAATATGTAAATTTTTGGTCAATTTGGCCATAAATCCGTACCTGG  
Sc07\_Sc07 ATAAAATATGTAAATTTTTGGTCAATTTGGCCATAAATCCGTACCTGG  
Sc07\_Sb07 ATGAAATACTGTAAATTTTTTGTCAATTTAGCCATAAATTCAGTACCTGG  
Sbay\_c674 ATGAAATACTGTAAATTTTTTGTCAATTTGGCCATGAATTCAGTACCTGG

← Scer\_YGL173C  
← Spas\_ScYGL173C  
Scer\_chr07 AGTAATAGAATTGAAATCAAAATGGCTCACC.....  
Sc07\_Sc07 AGTAATAGAATTGAAATCAAAATGGCTCACC.....  
Sc07\_Sb07 AGTAATACAGTTTGAATCGAACGGCTCACCT.....  
Sbay\_c674 AGTAATACAATTTGAGTCGAACGGTTCACCT.....  
← Spas\_ScYGL173C/SbYGL173C  
← Sbay\_YGL173C

1-6) ScVIII / SbVIII

← Scer\_YHR165C  
 ← Spas\_ScYHR165C  
 ← Spas\_ScYHR165C/SbYHR165C

Scer\_chr08 ..... CATCGGATATCTCAATAAACTTCTTTAATAAATTTTGGGAAGGA  
 Sc08\_Sc08 ..... CATCGGATATCTCAATAAACTTCTTTAATAAATTTTGGGAAGGA  
 Sc08\_Sb08 ..... CATCGGATATCTCAATAAACTTCTTTAATAAATTTTGGGAAGGA  
 Sb08\_Sb08 ..... CATCAGATATCTCAATAAACTTCTTTAATAAATTTCTTGGGAGCA  
 Sbay\_c599 ..... CATCAGATATCTCAATAAACTTCTTTAATAAATTTCTTGGGAAGTA  
 ← Spas\_SbYHR16C  
 ← Sbay\_YHR165C

Scer\_chr08 CGTAAACATTCTGTTCCTCCACGAAATCATCAGCCGAAACATAAATGTTT  
 Sc08\_Sc08 CGTAAACATTCTGTTCCTCCACGAAATCATCAGCCGAAACATAAATGTTT  
 Sc08\_Sb08 CGTAAACATTCTGTTCCTCCACGAAATCATCAGCCGAAACATAAATGTTT  
 Sb08\_Sb08 CATAAACATTCTGCTTCTTACAAAATCATCGGCTGAGATATAAGTGTTT  
 Sbay\_c599 CATAGACATTCTGCTTCTTACAAAATCATCAGCTGAGATATAAGTGTTT

Scer\_chr08 TTTAACCTCAAATAAATAGTGTATTAGCAATTGCAGATTTTCTCCATTC  
 Sc08\_Sc08 TTTAACCTCAAATAAATAGTGTATTAGCAATTGCAGATTTTCTCCATTC  
 Sc08\_Sb08 TTTAACCTCAAATAAATAGTGTATTAGCAATTGCAGATTTTCTCCATTC  
 Sb08\_Sb08 TTCAGTCTCAAATGTAATAATGTATTGGCGATGGCTGATTTTCTCCATTC  
 Sbay\_c599 TTCAACCTCAAATGTAATAACGTATTGGCGATGGCAGATTTTCTCCATTC

Scer\_chr08 ATTCTTTGAACATAACGTTTGACTTTCGTAATCAGCGGAAGCTACTACAA  
 Sc08\_Sc08 ATTCTTTGAACATAACGTTTGACTTTCGTAATCAGCGGAAGCTACTACAA  
 Sc08\_Sb08 ATTCTTTGAACATAACGTTTGACTTTCGTAATCAGCGGAAGCTACTACAA  
 Sb08\_Sb08 GTTCTTCGAGCTAAACGTTTGTTGTTTCGTAATCAGCAGAAGCTACTACGA  
 Sbay\_c599 GTTCTTCGAGGTAATGTTTGATTTTCGTAATCAGCAGAAGCTACTACGA

Scer\_chr08 CTATCTCCTCACCTTGCGCATTGATAGTTTTAGTTTCATAACAGTTGAT  
 Sc08\_Sc08 CTATCTCCTCACCTTGCGCATTGATAGTTTTAGTTTCATAACAGTTGAT  
 Sc08\_Sb08 CTATCTCCTCACCTTGCGCATTGATAGTTTTAGTTTCATAACAGTTGAT  
 Sb08\_Sb08 CAATTTCTCCTCACCTTGCGCATTATGGTCTTAGTTTCATAACAGTTGAT  
 Sbay\_c599 CGATTTCTTCCCTTGCGCGTTGATAGTCTTGGTCTTCATAACAGTTGAT

Scer\_chr08 GCACCTGCAGCTTCTTCGTGTTCTGCTTTTCTGACCTGGCAGCTTCTAA  
 Sc08\_Sc08 GCACCTGCAGCTTCTTCGTGTTCTGCTTTTCTGACCTGGCAGCTTCTAA  
 Sc08\_Sb08 GCACCTGCAGCTTCTTCGTGTTCTGCTTTTCTGACCTGGCAGCTTCTAA  
 Sb08\_Sb08 GCACCTACAGTTTCTTCATCATTGTTTTTTCAGCCCTAGCAGCTTCTAA  
 Sbay\_c599 GCACCTACAGTTTCTTCGTCAATTTGCTTTTTCAGCCCTAGCAGCTTCTAA

Scer\_chr08 TTCAGCCATTTTTGTCTCTTACAGATGGTGCCTTGATATTTGACCCA  
 Sc08\_Sc08 TTCAGCCATTTTTGTCTCTTACAGATGGTGCCTTGATATTTGACCCA  
 Sc08\_Sb08 TTCAGCCATTTTTGTCTCTTACAGATGGTGCCTTGATATTTGACCCA  
 Sb08\_Sb08 TTCAGCCATTTTTGTCTCTTGACAGATGGCGCTTTGATATTTGACCCA  
 Sbay\_c599 TTCAGCCATTTTTGTCTCTTGACAGATGGCGCTTTGATATTTGACCCA

Scer\_chr08 ATATAATATCTTTAATTTCCGTTTGAAGTTAAGGCAGATATATTGACATTG  
 Sc08\_Sc08 ATATAATATCTTTAATTTCCGTTTGAAGTTAAGGCAGATATATTGACATTG  
 Sc08\_Sb08 ATATAATATCTTTAATTTCCGTTTGAAGTTAAGGCAGATATATTGACATTG  
 Sb08\_Sb08 ATATGATATCCTTTAATTTAGTTTGGTTAAGGCAGATATATTGACATTG  
 Sbay\_c599 ATATGATATCCTTTAATTTAGTTTGAAGTTAAGGCAGATATATTGACATTG

Scer\_chr08 TATTTTCTGCCGTACTCAGTCAAATCAAATCTCTCATTGAGATTCGAT  
 Sc08\_Sc08 TATTTTCTGCCGTACTCAGTCAAATCAAATCTCTCATTGAGATTCGAT  
 Sc08\_Sb08 TATTTTCTGCCGTACTCAGTCAAATCAAATCTCTCATTGAGATTCGAT  
 Sb08\_Sb08 TATTTTACCCTGATTTCTGTTAAATTAATCTCTCATTGAGATTCGAT  
 Sbay\_c599 TACTTTTGGCCGTATTTCTGTAAGAAATTAATCTCTCATTGAGATTCGAT

Scer\_chr08 AGTGATCCATTGTTCAATCAGTGAATGAAGGCCATAAATGGTACGATTTGA  
 Sc08\_Sc08 AGTGATCCATTGTTCAATCAGTGAATGAAGGCCATAAATGGTACGATTTGA  
 Sc08\_Sb08 AGTGATCCATTGTTCAATCAGTGAATGAAGGCCATAAATGGTACGATTTGA  
 Sb08\_Sb08 ATTAATCCATTGTTCTCAGAGAAAGATGGCCATAAATGGTACGATTTGA  
 Sbay\_c599 ATTAATCCATTGTTCTCAGAGAAAGATGGCCATAAATGGTACGATTTGA

Scer\_chr08 TAGTGATCGTGGGTCACTGAGTAGAATCATTTTGGCACTTTCCCTCGTTC  
Sc08\_Sc08 TAGTGATCGTGGGTCACTGAGTAGAATCATTTTGGCACTTTCCCTCGTTC  
Sc08\_Sb08 TAGTGATCGTGGGTCACTGAGTAGAATCATTTTGGCACTTTCCCTCGTTC  
Sb08\_Sb08 TCGTGATCGTGGGTCACTGAGTAGAATCATCTTCGCACTTTCTTCATTT  
Sbay\_c599 TAGTGATCGTGGGTCACTGAGTAGAATCATCTTCGCACTTTCTTCATTT

Scer\_chr08 GTCTTTAAAGCTCTTAAAGTAGTGTAAAGTCTAGAAAATGCAGTGTACGA  
Sc08\_Sc08 GTCTTTAAAGCTCTTAAAGTAGTGTAAAGTCTAGAAAATGCAGTGTACGA  
Sc08\_Sb08 GTCTTTAAAGCTCTTAAAGTAGTGTAAAGTCTAGAAAATGCAGTGTACGA  
Sb08\_Sb08 GTCTTCAAAGCTCTCAAAGTAGTGTAAAGTCTAGAAAATGCAGTGTACGA  
Sbay\_c599 GTCTTCAAAGCTCTCAAAGTAGTGTAAAGTCTAGAAAATGCAGTGTACGA

Scer\_chr08 TGAAATACGGTCTAACCAATCATCTAAATGTTAAACAGAACCATCTGAG  
Sc08\_Sc08 TGAAATACGGTCTAACCAATCATCTAAATGTTAAACAGAACCATCTGAG  
Sc08\_Sb08 TGAAATACGGTCTAACCAATCATCTAAATGTTAAACAGAACCATCTGAG  
Sb08\_Sb08 CGAAATACGCTCCAACCAATCATCTAGATATTGAAAGAACCATTGAG  
Sbay\_c599 TGAAATACGTTCCAACCAATCATCTAGATATTGAAAGAACCATTGAG

Scer\_chr08 GTTCAGTAGCTTTTCATCACAACATCAGAAAAGTTTATCTATTGACATTGCA  
Sc08\_Sc08 GTTCAGTAGCTTTTCATCACAACATCAGAAAAGTTTATCTATTGACATTGCA  
Sc08\_Sb08 GTTCAGTAGCTTTTCATCACAACATCAGAAAAGTTTATCTATTGACATTGCA  
Sb08\_Sb08 GCTCCGTAGCTTTTCATGACAACATCAGAAAAGTTTATCTATTGACATTGCA  
Sbay\_c599 GCTCCGTAGCTTTTCATGACAACATCAGAAAAGTTTATCTATTGACATTGCA

Scer\_chr08 GCTGAAAATGGTAGTCGCAGCTCTGTGGCCTGATTGCTATGTTAGGAAA  
Sc08\_Sc08 GCAGAAAATGGTAGTCGCAGCTCTGTGGCCTGATTGCTATGTTAGGAAA  
Sc08\_Sb08 GCAGAAAATGGTAGTCGCAGCTCTGTGGCCTGATTGCTATGTTAGGAAA  
Sb08\_Sb08 GCAGAAAATGGCACTGTAGTTCTGTAGGCTGATTGCTATGTTAGGAAA  
Sbay\_c599 GCCGAAAATGGCACTGTAGTTCTGTAGGCTGATTGCTATGTTAGGAAA

Scer\_chr08 GTCAAGCATGTGAACCTCTAAAGGATCAAGCATTGCCTTTCTTGTGACGA  
Sc08\_Sc08 GTCAAGCATGTGAACCTCTAAAGGATCAAGCATTGCCTTTCTTGTGACGA  
Sc08\_Sb08 GTCAAGCATGTGAACCTCTAAAGGATCAAGCATTGCCTTTCTTGTGACGA  
Sb08\_Sb08 ATCAAGCATGTGAACCTCTAAAGGATCTAGCATTGCCTTTCTCGTACTA  
Sbay\_c599 GTCAAGCATGTGAACCTCTAAAGGATCTAGCATTGCCTTTCTCGTACTA

Scer\_chr08 TAATTTGTTTTGGCTGCTCTTCTTTGGGCAAAGATCTCACAAGAGCACTA  
Sc08\_Sc08 TAATTTGTTTTGGCTGCTCTTCTTTGGGCAAAGATCTCACAAGAGCACTA  
Sc08\_Sb08 TAATTTGTTTTGGCTGCTCTTCTTTGGGCAAAGATCTCACAAGAGCACTA  
Sb08\_Sb08 TGATTTGTTTTGGTTGTTCTTCTTTGGGTAGAGACCTTACAAGAGCACTA  
Sbay\_c599 TAATTTGTTTTGGTTGTTCTTCTTTAGGTAGAGACCTTACAAGAGCACTA

Scer\_chr08 ACTTCTCAGCTGTTTTCCATTTGGCCAATTGGCTTAAACGTTTTTGACC  
Sc08\_Sc08 ACTTCTCAGCTGTTTTCCATTTGGCCAATTGGCTTAAACGTTTTTGACC  
Sc08\_Sb08 ACTTCTCAGCTGTTTTCCATTTGGCCAATTGGCTTAAACGTTTTTGACC  
Sb08\_Sb08 ACTTCTTCGGCGTTTTCCATTTGGCCAATTGGCTTAAACGTTTTTGACC  
Sbay\_c599 ACTTCTTCGGCAGTTTTCCATTTGCTAACTGACTCAGACGCTTTTGACC

Scer\_chr08 GGCCCATACAGAGGTATGGATAATTTTCAGAAACAGATGCCAGTCTTTG  
Sc08\_Sc08 GGCCCATACAGAGGTATGGATAATTTTCAGAAACAGATGCCAGTCTTTG  
Sc08\_Sb08 GGCCCATACAGAGGTATGGATAATTTTCAGAAACAGATGCCAGTCTTTG  
Sb08\_Sb08 AGCCCATACAGAGTATGAATGATTTTCAAAAATAGTGGCCAGTCTTAG  
Sbay\_c599 AGCCCATACAGAGTATGGATGATTTTCAAAAATAAGTGGCCAGTCTTAG

Scer\_chr08 GATTTAAAGTGAAAATGCAACCATTAAATTGCTTTGTAGCAACGTTCCCT  
Sc08\_Sc08 GATTTAAAGTGAAAATGCAACCATTAAATTGCTTTGTAGCAACGTTCCCT  
Sc08\_Sb08 GATTTAAAGTGAAAATGCAACCATTAAATTGCTTTGTAGCAACGTTCCCT  
Sb08\_Sb08 GGTTTAAAGTGAAAATGCAACCATTAAATTGCTTTGTAGCAACGTTCCCT  
Sbay\_c599 GGTTTAAAGTGAAAATGCAACCATTAAATTGCTTTGTAGCAACGTTCCCT

Scer\_chr08 TCAAAAGTCTTGTGGACAGTAACTCTATACACATTAGTGTGTCACGAA  
Sc08\_Sc08 TCAAAAGTCTTGTGGACAGTAACTCTATACACATTAGTGTGTCACGAA  
Sc08\_Sb08 TCAAAAGTCTTGTGGACAGTAACTCTATACACATTAGTGTGTCACGAA  
Sb08\_Sb08 TCAAAAGTCTTGTGGACAGTAACTCTATAAACATTAGTGTGTCACAAA  
Sbay\_c599 TCAAAAGTCTTGTGGACAGTAACTCTATAAACATTAGTGTGTCACAAA



Scer\_chr08 GAGTTTAAATGTCGTTATTGAATAACTCGGCATAGTTTGAGGAGTTTAAAA  
Sc08\_Sc08 GAGTTTAAATGTCGTTATTGAATAACTCGGCATAGTTTGAGGAGTTTAAAA  
Sc08\_Sb08 GAGTTTAAATGTCGTTATTGAATAACTCGGCATAGTTTGAGGAGTTTAAAA  
Sb08\_Sb08 AAGTTTATATCGTTATTGAACAAGTCTGCATAGTTTGAAGAGTTCAAAA  
Sbay\_c599 AAGTTTATATCGTTATTGAACAAGTCTGCATAGTTTGAAGAGTTCAAAA

Scer\_chr08 ATGGTTCCTGTACTAGATTGATATATTTGAAGACCTTTTCTAATACGT  
Sc08\_Sc08 ATGGTTCCTGTACTAGATTGATATATTTGAAGACCTTTTCTAATACGT  
Sc08\_Sb08 ATGGTTCCTGTACTAGATTGATATATTTGAAGACCTTTTCTAATACGT  
Sb08\_Sb08 ACGTTCCTGTACTAGATTGATATATTTGAAGACCTTTTCTGATACGC  
Sbay\_c599 ACGTTCCTGTACTAGATTGATATATTTGAAGACCTTTTCTAATACGC

Scer\_chr08 TCACGAAGGACATATAATGCTGGGTTAGCTTTCATAATGTTCCTCACT  
Sc08\_Sc08 TCACGAAGGACATATAATGCTGGGTTAGCTTTCATAATGTTCCTCACT  
Sc08\_Sb08 TCACGAAGGACATATAATGCTGGGTTAGCTTTCATAATGTTCCTCACT  
Sb08\_Sb08 TCACGAAGAACATACAATGCTGGATTGGCTTTCATAATCGTTCTCACT  
Sbay\_c599 TCACGAAGAACATACAATGCTGGTTAGCTTTCATAATCGTTCTCATGCT

Scer\_chr08 ATTTTGTATCAAAGGTTTAAATCCGTGAACCAATTACCATAGGCATCAT  
Sc08\_Sc08 ATTTTGTATCAAAGGTTTAAATCCGTGAACCAATTACCATAGGCATCAT  
Sc08\_Sb08 ATTTTGTATCAAAGGTTTAAATCCGTGAACCAATTACCATAGGCATCAT  
Sb08\_Sb08 ATTTTGTATCAAAGGTTTAAATCCGTCAAACCAATTACCATAGGCATCAT  
Sbay\_c599 ATTTTGTATCAAAGGTTTAAATCCGTGAACCAATTACCATAGGCATCAT

Scer\_chr08 ACATGTTATAAGCCAAATCGATACCGATCATAACACCTGTTGGGGAGGGA  
Sc08\_Sc08 ACATGTTATAAGCCAAATCGATACCGATCATAACACCTGTTGGGGAGGGA  
Sc08\_Sb08 ACATGTTATAAGCCAAATCGATACCGATCATAACACCAAGTTGGTGAGGGA  
Sb08\_Sb08 ACATATTGTAGGCCAGATCGATACCAATCATAACACCAAGTTGGTGAGGGA  
Sbay\_c599 ACATATTATATGCCAAATCGATACCAATCATGACACCAAGTTGGTGAGGGA  
Sc08 > Sb08

Scer\_chr08 TACATGCTGACATTATCTGTTGTATAATCGAGGAATTTGCTCCTCACATA  
Sc08\_Sc08 TACATGCTGACATTATCTGTTGTATAATCGAGGAATTTGCTCCTCACATA  
Sc08\_Sb08 TACATGCTGACATTATCTGTTGTATAATCAAGAAATTTGCTCCTCACATA  
Sb08\_Sb08 TACATGCTGACATTATCCGTTGTATAATCAAGAAATTTGCTCCTCACATA  
Sbay\_c599 TACATGCTAACAATTATCCGTCGTATAATCAAGGAATTTGCTCCTCACATA

Scer\_chr08 ACGAGATATATCATGAGAATCATAATCACCGTATCTCAATTGTACATCAA  
Sc08\_Sc08 ACGAGATATATCATGAGAATCATAATCACCGTATCTCAATTGTACATCAA  
Sc08\_Sb08 ACGAGATATATCTGGGAATCGTAATCACCATATCTCAATTGCACATCAA  
Sb08\_Sb08 ACGAGATATATCTGGGAATCGTAATCACCATATCTCAATTGCACATCAA  
Sbay\_c599 ACGAGATATATCTGGGAATCGTAATCACCATATCTCAATTGCACATCAA

Scer\_chr08 ACCACATTTTGTGGTAAATCAATCCCTTAAATGAGTCAATTTGTTTCATGT  
Sc08\_Sc08 ACCACATTTTGTGGTAAATCAATCCCTTAAATGAGTCAATTTGTTTCATGT  
Sc08\_Sb08 ACCACATCTTATTGGTAAACCATCCTTGAAGTTATCAATTAGTTTCATGT  
Sb08\_Sb08 ACCACATCTTATTGGTAAACCATCCTTGAAGTTATCAATTAGTTTCATGT  
Sbay\_c599 ACCACATCTTATTGGTAAACCACACCTTAAAGTTATCGTTGGTTTCATGT

Scer\_chr08 AATAGGGAGGGTTTGAACCTCCCATTCATGAACACTTCCATAGTTAT  
Sc08\_Sc08 AATAGGGAGGGTTTGAACCTCCCATTCATGAACACTTCCATAGTTAT  
Sc08\_Sb08 AATAAGGAAGGTTTCGAGACCTCCCATTCATAAACACTATCCATGGTGAC  
Sb08\_Sb08 AATAAGGAAGGTTTCGAGACCTCCCATTCATAAACACTATCCATGGTGAC  
Sbay\_c599 AATAAGGAAGGTTTGAACCTCCCATTCATGAACACTTCCATAGTTAT

Scer\_chr08 GTCAGCGGCAGATGAATTCATCTTGTAAGATTGCGGGGATGCACCTGTTT  
Sc08\_Sc08 GTCAGCGGCAGATGAATTCATCTTGTAAGATTGCGGGGATGCACCTGTTT  
Sc08\_Sb08 ATCAGCAGCGGATGAGTTTCATTTTGTAAGATTGCGGGGATGAACGGTTT  
Sb08\_Sb08 ATCAGCAGCGGATGAGTTTCATTTTGTAAGATTGCGGGGATGAACGGTTT  
Sbay\_c599 ATCAGCGCGGATGAGTTTCATTTTGTAAGATTGCGGGGATGCACCTGTTT

Scer\_chr08 CTTTAGTCACAGATTCAATTTGCAAAACATCTAGCTCACCATCGAGGATT  
Sc08\_Sc08 CTTTAGTCACAGATTCAATTTGCAAAACATCTAGCTCACCATCGAGGATT  
Sc08\_Sb08 CCTTCGATACAGATTCAATTTGTAGAACATCTAACCCCGTCAAGAAATC  
Sb08\_Sb08 CCTTCGATACAGATTCAATTTGTAGAACATCTAACCCCGTCAAGAAATC  
Sbay\_c599 CCTTCGATACAGATTCAATTTGCAAAACATCTAATTCCCCGTCAAGAAATC

Scer\_chr08 TGACAAATATCAAAACTATACTTTCATGTATTTTTTGCACAAATGAGC  
Sc08\_Sc08 TGACAAATATCAAAACTATACTTTCATGTATTTTTTGCACAAATGAGC  
Sc08\_Sb08 TGACAAATATCAAAACTATACTTTCGTGTATTTTTTGCACAAATGAGC  
Sb08\_Sb08 TGACAAATATCAAAACTATACTTTCGTGTATTTTTTGCACAAATGAGC  
Sbay\_c599 TGACAAATATCAAAACTATACTTTCGTGTATTTTTTGCACAAATGAGC

Scer\_chr08 ACGGAATATTTGAATTAAGATATTTTAACTAGGAATTTTACCATGGA  
Sc08\_Sc08 ACGGAATATTTGAATTAAGATATTTTAACTAGGAATTTTACCATGGA  
Sc08\_Sb08 ACGGAATATTTGAATTAAGATATCTTTAGTGTGGGAATTTTACCGTGAA  
Sb08\_Sb08 ACGGAATATTTGAATTAAGATATCTTTAGTGTGGGAATTTTACCGTGAA  
Sbay\_c599 ACGGAATATTTGAATTAAGATATCTTTAGTGTGGGAATTTTACCGTGAA

Scer\_chr08 GGAAATACCAGTCAGATCCAATTGCACCAAGAAACCGACATAGACATTT  
Sc08\_Sc08 GGAAATACCAGTCAGATCCAATTGCACCAAGAAACCGACATAGACATTT  
Sc08\_Sb08 GGAAATACCAGTCAGATCTAATTGTACTAGGAAACCAACGTAAACGTTT  
Sb08\_Sb08 GGAAATACCAGTCAGATCTAATTGTACTAGGAAACCAACGTAAACGTTT  
Sbay\_c599 GGAAATACCAGTCAGATCTAATTGTACTAGGAAACCAACGTAAACGTTT

Scer\_chr08 GCTCTGTTAATAGTTGGTGACCACCATAAGGTAACTCTACGATTTGGAAT  
Sc08\_Sc08 GCTCTGTTAATAGTTGGTGACCACCATAAGGTAACTCTACGATTTGGAAT  
Sc08\_Sb08 GCTCTATTGATAGTTGGAGACCACCATAAGTAACTCTACGATTTGGAAT  
Sb08\_Sb08 GCTCTATTGATAGTTGGAGACCACCATAAGTAACTCTACGATTTGGAAT  
Sbay\_c599 GCTCTATTGATAGTTGGAGACCACCATAAGTAACTCTACGATTTGGAAT

Scer\_chr08 TTGGCTTAAACCAAGTTCTTTGAGCATGAGTTAGCTTCTTAAATTCATGG  
Sc08\_Sc08 TTGGCTTAAACCAAGTTCTTTGAGCATGAGTTAGCTTCTTAAATTCATGG  
Sc08\_Sb08 TTGACTTAAACCTGTTCTTTGTGCATGAGTTAAGCTTTTAAATTCATGG  
Sb08\_Sb08 TTGACTTAAACCTGTTCTTTGTGCATGAGTTAAGCTTTTAAATTCATGG  
Sbay\_c599 TTGGCTTAAACCAAGTTCTTTGAGCATGAGTTAAGCTTTTAAATTCATGG

Scer\_chr08 AATCCTCAAAACCGGACGCCTTTTCCAAAACAACCTTCCCATGAATTA  
Sc08\_Sc08 AATCCTCAAAACCGGACGCCTTTTCCAAAACAACCTTCCCATGAATTA  
Sc08\_Sb08 AATCCTCAAAACCGGAAGCCTTTTCCAAAACAGACCTTCCCATGAATTA  
Sb08\_Sb08 AATCCTCAAAACCGGAAGCCTTTTCCAAAACAGACCTTCCCATGAATTA  
Sbay\_c599 AATCCTCAAAACCGGAAGCCTTTTCCAAAACAGACCTTCCCATGAATTA

Scer\_chr08 AAACCAAGTCCCCTTAAATAAGTGTGTTCCAAAATGTTTCAATACCCTCC  
Sc08\_Sc08 AAACCAAGTCCCCTTAAATAAGTGTGTTCCAAAATGTTTCAATACCCTCC  
Sc08\_Sb08 AATCCGTTCCCCTGAATAGAGTATGTTCCAAAATGTTTCAATACCCTCC  
Sb08\_Sb08 AATCCGTTCCCCTGAATAGAGTATGTTCCAAAATGTTTCAATACCCTCC  
Sbay\_c599 AAACCAAGTCCCCTGAATAGAGTATGTTCCAAAATGTTTCAATACCCTCC

Scer\_chr08 TAGGCTTGAATCACATCAGTTCTATAGGCATTAAATTCATAATTAC  
Sc08\_Sc08 TAGGCTTGAATCACATCAGTTCTATAGGCATTAAATTCATAATTAC  
Sc08\_Sb08 AAGCGCTTGGATAACATCGGTTCTATACGCATTCAAATTCACAACCTAC  
Sb08\_Sb08 AAGCGCTTGGATAACATCGGTTCTATACGCATTCAAATTCACAACCTAC  
Sbay\_c599 GAGCGCTTGGATAACATCGGTTCTATACGCATTCAAATTCACAACCTAC

Scer\_chr08 CGTCATGGTGGAGTTTGTCCACCAAAAAGGGCTGTTTCTCTCTAGAGAG  
Sc08\_Sc08 CGTCATGGTGGAGTTTGTCCACCAAAAAGGGCTGTTTCTCTCTAGAGAG  
Sc08\_Sb08 CATCGTGGTGTGAGTTTGTCCACCAAAAAGGACTGTTTCTCTCTAGAGAG  
Sb08\_Sb08 CATCGTGGTGTGAGTTTGTCCACCAAAAAGGACTGTTTCTCTCTAGAGAG  
Sbay\_c599 CATCGTGGTGTGAGTTTGTCCACCAAAAAGGACTGTTTCTCTCTAGAGAG

Scer\_chr08 TACTGTTTAAATCCCTACGGATTCTGTGACCTCTGCATACGCTAGAGT  
Sc08\_Sc08 TACTGTTTAAATCCCTACGGATTCTGTGACCTCTGCATACGCTAGAGT  
Sc08\_Sb08 TACTGCTTAAATCCCTACGGATTCTATGACCTCTATCATAAGCCAGGGT  
Sb08\_Sb08 TACTGCTTAAATCCCTACGGATTCTATGACCTCTATCATAAGCCAGGGT  
Sbay\_c599 TATGCTTGAACCTCTACGGATTCTATGACCTCTATCATAAGCCAGAGT

Scer\_chr08 ATGTCGATCTCTTTGAAATAAAGTGCTAATACGAGGTATACCACGATCCC  
Sc08\_Sc08 ATGTCGATCTCTTTGAAATAAAGTGCTAATACGAGGTATACCACGATCCC  
Sc08\_Sb08 GTGCCATCTTTTGAATAGTGTACTGATACGCGGTATACCACGATCCC  
Sb08\_Sb08 GTGCCATCTTTTGAATAGTGTACTGATACGCGGTATACCACGATCCC  
Sbay\_c599 GTGCTATCTTTTGAATAGCTACTAATACGCGGTATACCACGATCCC

Scer\_chr08 ACGATCCTTCAAGTTCTTCAAAGCTAACCTCCTATTCTGCTGAATAGCT  
Sc08\_Sc08 ACGATCCTTCAAGTTCTTCAAAGCTAACCTCCTATTCTGCTGAATAGCT  
Sc08\_Sb08 ATGATCCTTCTAGTTCTTCAAAGCCAGTCTTCTATTCTGCTGTATAGCT  
Sb08\_Sb08 ATGATCCTTCTAGTTCTTCAAAGCCAGTCTTCTATTCTGCTGTATAGCT  
Sbay\_c599 ATGATCCTTCAAGTTCTTCAAAGCCAGTCTTCTATTCTGCTGAATAGCT

Scer\_chr08 TCTTGCCTTTTCGTTGCATACTCGGCCACACCCTTGTGAGAGTCTAAAAA  
Sc08\_Sc08 TCTTGCCTTTTCGTTGCATACTCGGCCACACCCTTGTGAGAGTCTAAAAA  
Sc08\_Sb08 TCTTGCCTTTTCGTTGCATACTCGGCCATACCCTTGTGAGAGTCTAAAAA  
Sb08\_Sb08 TCTTGCCTTTTCGTTGCATACTCGGCCATACCCTTGTGAGAGTCTAAAAA  
Sbay\_c599 TCTTGCCTTTTCGTTGCATATTCGGCCATACCCTTGTGAGAGTCTAAAAA

Scer\_chr08 TTCATTTTCCAAGTAGTGATGTAAACGGAAGATAGTTGGGATTAAATTTT  
Sc08\_Sc08 TTCATTTTCCAAGTAGTGATGTAAACGGAAGATAGTTGGGATTAAATTTT  
Sc08\_Sb08 TTCATTTTCCAAGTAGTTATATAACGGAATCGTGGGAATCAATTTT  
Sb08\_Sb08 TTCATTTTCCAAGTAGTTATATAACGGAATCGTGGGAATCAATTTT  
Sbay\_c599 TTCATTTTCCAAGTAGTTATATAACGGAATCGTGGGAATCAATTTT

Scer\_chr08 CATCCTCGTGCATACACCAGCACGAAAATGCGTAATTCCAGTATCGGTC  
Sc08\_Sc08 CATCCTCGTGCATACACCAGCACGAAAATGCGTAATTCCAGTATCGGTC  
Sc08\_Sb08 CGTCCTCATGTGTACATACACCAGCACGAAAAGTGTGATTCCAGTATCAGTT  
Sb08\_Sb08 CGTCCTCATGTGTACATACACCAGCACGAAAAGTGTGATTCCAGTATCAGTT  
Sbay\_c599 CGTCCTCATGTGTACATACACCAGCACGAAAAGTGTGATTCCAGTATCAGTT

Scer\_chr08 TGTTTTGACCAACTTAAGTCAGATGCAGGAATTAATATGAGAAGCACT  
Sc08\_Sc08 TGTTTTGACCAACTTAAGTCAGATGCAGGAATTAATATGAGAAGCACT  
Sc08\_Sb08 TGTTTTGACCAGCTCAAGTCTGATGCAGGAATTAATATGAGAAGCACT  
Sb08\_Sb08 TGTTTTGACCAGCTCAAGTCTGATGCAGGAATTAATATGAGAAGCACT  
Sbay\_c599 TGTTTTGACCAGCTTAAGTCTGATGCAGGAATTAATATGAGAAGCACT

Scer\_chr08 AATCATACCAACCACCAAGTTCTTTTGGTGTATAAAAAACAGCAGGTG  
Sc08\_Sc08 AATCATACCAACCACCAAGTTCTTTTGGTGTATAAAAAACAGCAGGTG  
Sc08\_Sb08 GATCATACCTAAACCACCAGCTCCTTTTGGTGTATAAAAAACAGCAGGTG  
Sb08\_Sb08 GATCATACCTAAACCACCAGCTCCTTTTGGTGTATAAAAAACAGCAGGTG  
Sbay\_c599 AATCATACCTAAACCACCAAGTTCTTTTGGTGTGTAGAAAACAGCAGGTG

Scer\_chr08 GAAATCTTGTGGCATTTCGAATTTAAACCAAGTTTGACACGGTTTTGA  
Sc08\_Sc08 GAAATCTTGTGGCATTTCGAATTTAAACCAAGTTTGACACGGTTTTGA  
Sc08\_Sb08 GAAATCTTGTGGCATTTCGATTTAGACCTAGTTTGACTCTGTTTTGA  
Sb08\_Sb08 GAAATCTTGTGGCATTTCGATTTAGACCTAGTTTGACTCTGTTTTGA  
Sbay\_c599 GAAATCTTGTGGCATTTCGATTTAGACCTAGTTTGACTCTGTTTTGA

Scer\_chr08 ATTCTTGTTCCTCTTTTACCAGGATATCTAATAACGGCTCCGTGGCAAC  
Sc08\_Sc08 ATTCTTGTTCCTCTTTTACCAGGATATCTAATAACGGCTCCGTGGCAAC  
Sc08\_Sb08 ATTCTTGTTCCTCTTTTACAAGTATATCTAATAAGGGCTCTGTGGCAAC  
Sb08\_Sb08 ATTCTTGTTCCTCTTTTACAAGTATATCTAATAAGGGCTCTGTGGCAAC  
Sbay\_c599 ATTCTTGTTCCTCTTTTACAAGTATATCTAGCAAGGGCTCTGTGGCAC

Scer\_chr08 AATGGCTTCTCTAAGTATGTGAAAAGGATATCAGTGAAGTGTCCATT  
Sc08\_Sc08 AATGGCTTCTCTAAGTATGTGAAAAGGATATCAGTGAAGTGTCCATT  
Sc08\_Sb08 AATAGCTTCCCTGAAGTAAAGTAAAAGAGATATTAAGAGGTATCCATT  
Sb08\_Sb08 AATAGCTTCCCTGAAGTAAAGTAAAAGAGATATTAAGAGGTATCCATT  
Sbay\_c599 GATAGCTTCTCTGAAGTAGGTAAAAGAGATATTAAGAGGTATCCATT

Scer\_chr08 TAGCGGCCACTTTAGTAAAAGTGGTGAACCGGAGGCCATCAATATGCCT  
Sc08\_Sc08 TAGCGGCCACTTTAGTAAAAGTGGTGAACCGGAGGCCATCAATATGCCT  
Sc08\_Sb08 TTGCCGCAACTTTGTTGAAAAGTGGTGAACCGGAGGCCATTAATATGCCT  
Sb08\_Sb08 TTGCCGCAACTTTGTTGAAAAGTGGTGAACCGGAGGCCATTAATATGCCT  
Sbay\_c599 TTGCCGCAACTTTCTGAAAAGTGGTGAACCGGAGGCCATTAATATGCCT

Scer\_chr08 CTTATTCTGCTGTCAAATTTTGGATTTCTTCTTCTGAGATACCTTTAAATA  
Sc08\_Sc08 CTTATTCTGCTGTCAAATTTTGGATTTCTTCTTCTGAGATACCTTTAAATA  
Sc08\_Sb08 CTTATTCTGCTGTCAAATTTATCGATTTCTTCTTCTGAGATACCTTCAAGTA  
Sb08\_Sb08 CTTATTCTGCTGTCAAATTTATCGATTTCTTCTTCTGAGATACCTTCAAGTA  
Sbay\_c599 CTTATTCTGCTGTCAAATTTATCGATTTCTTCTTCTGAGATACCTTCAAGTA

Scer\_chr08 T GCTTTTGCAGTTCTTGGCTTGGTTCCTTCGTCAACTAAATCCCAAACAC  
Sc08\_Sc08 T GCTTTTGCAGTTCTTGGCTTGGTTCCTTCGTCAACTAAATCCCAAACAC  
Sc08\_Sb08 CGCTTTTGTCTGTTCTCTGCTTTGTTTCTCGTCGATTAATCCCAAACAC  
Sb08\_Sb08 CGCTTTTGTCTGTTCTCTGCTTTGTTTCTCGTCGATTAATCCCAAACAC  
Sbay\_c599 CGCTTTTGTCTGTTCTTGGCTTTGTTTCTCGTCGACTAAATCCCAAACAC

Scer\_chr08 CTTTCATCGTTAGAAACACCTCTTCCATTCTTTGTCTTGGTAAATATTCTG  
Sc08\_Sc08 CTTTCATCGTTAGAAACAGCTCTTCCATTCTTTGTCTTGGTAAATATTCTG  
Sc08\_Sb08 CTTTCATCATTGGAATTACATCTTCCATCCTTTGTCTTGGTAAATCCTA  
Sb08\_Sb08 CTTTCATCATTGGAATTACATCTTCCATCCTTTGTCTTGGTAAATCCTA  
Sbay\_c599 CTTTCATCATTGGAATCACTTCTTCCATCCTTTGTCTTGGTAAATCCTA

Scer\_chr08 ACTTCAAAACCCACACATAGAGAAAGATAAGTTCGGATTGTTTTACTGTA  
Sc08\_Sc08 ACTTCAAAACCCACACATAGAGAAAGATAAGTTCGGATTGTTTTACTGTA  
Sc08\_Sb08 ACCTCAAAGCCACACATAGAGAAATAATAAATTTGGATTATTTTTACTATA  
Sb08\_Sb08 ACCTCAAAGCCACACATAGAGAAATAATAAATTTGGATTATTTTTACTATA  
Sbay\_c599 ACCTCAAAGCCACACATAGAGAAAGCAATTTGGATTGTTTTACTATA

Scer\_chr08 TACGGAAACAAAAGCATTTCCTATTAATTGACGTTAACGAAGTTGGCA  
Sc08\_Sc08 TACGGAAACAAAAGCATTTCCTATTAATTGACGTTAACGAAGTTGGCA  
Sc08\_Sb08 CACTGAAACAAATGCATTTTCCATTTATGGATGTAATTGAAGTAGGCA  
Sb08\_Sb08 CACTGAAACAAATGCATTTTCCATTTATGGATGTAATTGAAGTAGGCA  
Sbay\_c599 CACAGAAACAAATGCATTTTCCATTTATGGATGTAAGTAGGATAGGCA

Scer\_chr08 CCTACTTTGAATTTCCCAAACACTGCTCGCCCTAGGTTAACGTCTGTA  
Sc08\_Sc08 CCTACTTTGAATTTCCCAAACACTGCTCGCCCTAGGTTAACGTCTGTA  
Sc08\_Sb08 CTCTGCCTTGAATTTCCCAAACACTGCACGTCCCAAGTTTACATCTGG  
Sb08\_Sb08 CTCTGCCTTGAATTTCCCAAACACTGCACGTCCCAAGTTTACATCTGG  
Sbay\_c599 CTCTGCCTTGAATTTCCCAAGAACACAGCACGTCTAGGTTTACGTCTGG

Scer\_chr08 CGTATTAGCCTCATGCGCGAATCTTTGGGCCAGCATTCTATTATTGTA  
Sc08\_Sc08 CGTATTAGCCTCATGCGCGAATCTTTGGGCCAACATTTCTATTATTGTA  
Sc08\_Sb08 CGGATTAGCCTCATGCGTGAGTCTTAGGCCAGCATTCTGTTATTGTA  
Sb08\_Sb08 CGGATTAGCCTCATGCGTGAGTCTTAGGCCAGCATTCTGTTATTGTA  
Sbay\_c599 CGGATTAACTCATTCGTGAGTCTTAGGCCAGCATTCTGTTATTGTA

Scer\_chr08 TCCGATGCTGTTTTCAAAGTTGGATCTGGATTCCTGCGCAAGTATTCAT  
Sc08\_Sc08 TCCGATGCTGTTTTCAAAGTTGGATCTGGATTCCTGCGCAAGTATTCAT  
Sc08\_Sb08 TCCAATGCTATTTCAAAGTTGGATCTGGGTTTCCGCTAAATATTCAT  
Sb08\_Sb08 TCCAATGCTATTTCAAAGTTGGATCTGGGTTTCCGCTAAATATTCAT  
Sbay\_c599 TCCGATGCTGTTTTCAAAGTTGGATCTGGGTTTCCGCTAGATATTCAT

Scer\_chr08 CAGTCAATTCCCTCCTCATCTTCTTCAAAGTGAAGAGCATATATATA  
Sc08\_Sc08 CAGTCAATTCCCTCCTCATCTTCTTCAAAGTGAAGAGCATATATATA  
Sc08\_Sb08 CTGTCAAGTTCAATTCCTCCTCATCTTCTTCAAAGCGAAGAGCATATAAATG  
Sb08\_Sb08 CTGTCAAGTTCAATTCCTCCTCATCTTCTTCAAAGCGAAGAGCATATAAATG  
Sbay\_c599 CAGACAGTTCAATTCCTCCTCATCTTCTTCAAAGTGAAGAGCATATAAATG

Scer\_chr08 CGATCTAAATATCTGGTGTAAAGTCTGATCGGATGTGCTTTTCTACTTC  
Sc08\_Sc08 CGATCTAAATATCTGGTGTAAAGTCTGATCGGATGTGCTTTTCTACTTC  
Sc08\_Sb08 CGATCCAAATATCTGGTATAGAGCTGATCGGATGTGCTTTTCTGTTC  
Sb08\_Sb08 CGATCCAAATATCTGGTATAGAGCTGATCGGATGTGCTTTTCTGTTC  
Sbay\_c599 CGATCCAAATATCTAGTATAGAGCTGATCGGATGTGCTTTTCTGTTC

Scer\_chr08 TTTGCTCTTGAATTGCATAAATTCATTTGGATTGTTAGCTGGACCAGCCA  
Sc08\_Sc08 TTTGCTCTTGAATTGCATAAATTCATTTGGATTGTTAGCTGGACCAGCCA  
Sc08\_Sb08 TCTGCTTTTGAATTGCATAAATTCATTTGGATTGTTGGCAGGGCCAGCCA  
Sb08\_Sb08 TCTGCTTTTGAATTGCATAAATTCATTTGGATTGTTGGCAGGGCCAGCCA  
Sbay\_c599 TCTGCTTTTGAATTGCATAAATTCATTTGGATTGTTGGCAGGGCCAGCCA

Scer\_chr08 AATCTGTAGCCCTTTCCTGACCCAATAGTAAAAGATCTATAACTAGTCCG  
Sc08\_Sc08 AATCTGTAGCCCTTTCCTGACCCAATAGTAAAAGATCTATAACTAGTCCG  
Sc08\_Sb08 AATCAGCAGCCCTTTCCTGGCCCAACAACAAAAGATCAACAACACTAGTCCA  
Sb08\_Sb08 AATCAGCAGCCCTTTCCTGGCCCAACAACAAAAGATCAACAACACTAGTCCA  
Sbay\_c599 AATCAGCAGCCCTTTCCTGGCCCAATAATAAGAGATCAATAACTAATCCA

Scer\_chr08 TAATATTGGAATATGAAAGAAGCGAACTTCAACCCGCGTATTAAGCCATA  
 Sc08\_Sc08 TAATATTGGAATATGAAAGAAGCGAACTTCAACCCGCGTATTAAGCCATA  
 Sc08\_Sb08 TAATATTGGAATATAAAAGAGGCAAACTGTAATCCGCGTACTAGACCGTA  
 Sb08\_Sb08 TAATATTGGAATATAAAAGAGGCAAACTGTAATCCGCGTACTAGACCGTA  
 Sbay\_c599 TAATATTGGAATATGAAAGAGGCAAACTGTAATCCGCGCACTAAACCGTA

Scer\_chr08 TTTGTTGACGTGACTCATATCTTTAAAGTTGATAACAACATTATTTTTG  
 Sc08\_Sc08 TTTGTTGACGTGACTCATATCTTTAAAGTTGATAACAACATTATTTTTG  
 Sc08\_Sb08 TTTGTTAACGTGACTCATATCCTTAAAGTTGATCATAACATTGTTTTTG  
 Sb08\_Sb08 TTTGTTAACGTGACTCATATCCTTAAAGTTGATCATAACATTGTTTTTG  
 Sbay\_c599 TTTGTTAACGTGACTCATATCCTTAAAGTTAATGATAACATTATTTCTTG

Scer\_chr08 CAGTGATATAGTCAGCAATATTAGGATCTACAATCAGCGAAGTAATCTA  
 Sc08\_Sc08 CAGTAATATAGTCAGCAATATTAGGATCTACAATCAGCGAAGTAATCTA  
 Sc08\_Sb08 CAGTAATGTAGTCAGCAATATTGGGTCACAATCAGACGAAGTAATCTA  
 Sb08\_Sb08 CAGTAATGTAGTCAGCAATATTGGGTCACAATCAGACGAAGTAATCTA  
 Sbay\_c599 CAGTGATGTAGTCAGCAATATTGGGTCACAATCAGACGAAGTAATCTA

← Scer\_YHR165C  
 ← Spas\_ScYHR165C  
 ← Spas\_ScYHR165C/SbYHR165C

Scer\_chr08 TT .....  
 Sc08\_Sc08 TT .....  
 Sc08\_Sb08 TT .....  
 Sb08\_Sb08 TT .....  
 Sbay\_c599 TT .....

← Spas\_SbYHR16C  
 ← Sbay\_YHR165C

1-7) ScX / SbX

Scer\_YJR008W →  
 Spas\_ScYJR008W →  
 Scer\_chr10 .....CACAGAGTTCTCATGTGACAAGTATTGATGATAGTAGTGT CAGTT  
 Sc10\_Sc10 .....CACAGAGTTCTCATGTGACAAGTATTGATGATAGTAGTGT CAGTT  
 Sc10\_Sb10 .....CACAGAGTTCTCATGTGACAAGTATTGATGATAGTAGTGT CAGTT  
 Sb10\_Sc10 .....CACAGAGTTCTCACGTGACAAGTATTGATGATAGTAGC GTTAGTT  
 Sb10\_Sb10 .....CACAGAGTTCTCACGTGACAAGTATTGATGATAGTAGC GTTAGTT  
 Sbay\_c646 .....CACAGAGTTCCATGTGACAAGTATTGATGATAGTAGC GTTAGTT  
 Spas\_SbYJR008W →  
 Sbay\_YJR008W →

Scer\_YJR008W →  
 Spas\_ScYJR008W →  
 Scer\_chr10 ATGCTTCAGGTTATGTTACTATAGGATAATGATCACGGCTAAAACGGTCG  
 Sc10\_Sc10 ATACTTCAGGTTATGTTACTATAGGATAATGATCACGGCTAAAACGGTCG  
 Sc10\_Sb10 ATACTTCAGGTTATGTTACTATAGGATAATGATCACGGCTAAAACGGTCG  
 Sb10\_Sc10 ACCTTCAGGATATGTTACTTTAGATTAGCTATTGTGCATTAAACAG-TTG  
 Sb10\_Sb10 ACCTTCAGGATATGTTACTTTAGATTAGCTATTGTGCATTAAACAG-TTG  
 Sbay\_c646 ACCTTCAGGATATGTTACTTTAGATTAGCTATTGTGCATTAAAGAC-TTG  
 Spas\_SbYJR008W →  
 Sbay\_YJR008W →

Scer\_chr10 AATGTAAGCATATATCTTTTCGATTGTATAAATTGTCCCAAATACCTACAGC  
 Sc10\_Sc10 AATGTAAGCATATATCTTTTCGATTGTATAAATTGTCCCAAATACCTACAGC  
 Sc10\_Sb10 AATGTAAGCATATATCTTTTCGATTGTATAAATTGTCCCAAATACCTACAGC  
 Sb10\_Sc10 AATGCGTACATATAC---TCATATGTATCATTTTGTACAATAAATGAAT  
 Sb10\_Sb10 AATGCGTACATATAC---TCATATGTATCATTTTGTACAATAAATGAAT  
 Sbay\_c646 AATGCATACATATAT---TCGTAAAATCGTTTGTATAAGCAATGAAGT

Scer\_chr10 ATCTCAAGGAAAAAAAACAA-----AAACTTC--AAAAAATCGAAT  
 Sc10\_Sc10 ATCTCAAGGAAAAAAAACAA-----AAACTTC--AAAAAATCGAAT  
 Sc10\_Sb10 ATCTCAAGGAAAAAAAACAA-----AAACTTC--AAAAAATCGAAT  
 Sb10\_Sc10 ATAATAAAAAACAGTAACAA-----AGCCTTTAAAAAAAATAAAT  
 Sb10\_Sb10 ATAATAAAAAACAGTAACAA-----AGCCTTTAAAAAAAATAAAT  
 Sbay\_c646 AAAATAAAAAAACAAATAA---TTAACGAAGCTTCTAAAAAAAATAAAT

Scer\_chr10 CCC---TGAGGAATCTTTAATACATTTCATCTATTTAAGTTTTATAAA  
 Sc10\_Sc10 CCC---TGAGGAATCTTTAATACATTTCATCTATTTAAGTTTTATAAA  
 Sc10\_Sb10 CCC---TGAGGAATCTTTAATACATTTCATCTATTTAAGTTTTATAAA  
 Sb10\_Sc10 TCCCAATGTGGAACCTTTAACAAATTCATCTATTTAAGTTTTATAAA  
 Sb10\_Sb10 TCCCAATGTGGAACCTTTAACAAATTCATCTATTTAAGTTTTATAAA  
 Sbay\_c646 TCCAT-TGTGGAACCTTTAACAAATTCATCTATTTAAGTTTTATAAA

Scer\_chr10 CGTGTATATGAGATGTCATGAGCATGAATTATTAATAATAAAAACTAAT  
 Sc10\_Sc10 CGTGTATATGAGATGTCATGAGCATGAATTATTAATAATAAAAACTAAT  
 Sc10\_Sb10 CGTGTATATGAGATGTCATGAGCATGAATTATTAATAATAAAAACTAAT  
 Sb10\_Sc10 CGTGTAT--GAGATATCATGAGCATGAATTATTAATAATAAAAACTAAT  
 Sb10\_Sb10 CGTGTAT--GAGATATCATGAGCATGAATTATTAATAATAAAAACTAAT  
 Sbay\_c646 CGTGTAT--GAGATGTCATGAGCATGAATTATTAATAATAAAAACTAAT

Scer\_YJR009C →  
 Spas\_ScYJR009C →  
 Spas\_ScYJR009C/SbYJR009C →  
 Scer\_chr10 CATTAAAGTAACTTAAAGGAGTTAAATTTAAGCCTTGGCAACGTGTTCAAC  
 Sc10\_Sc10 CATTAAAGTAACTTAAAGGAGTTAAATTTAAGCCTTGGCAACGTGTTCAAC  
 Sc10\_Sb10 CATTAAAGTAACTTAAAGGAGTTAAATTTAAGCCTTGGCAACGTGTTCAAC  
 Sb10\_Sc10 CATTAAAGCAACTTAAAGGAGTTAAATTTAAGCTCTGGCAACGTGTTCAAC  
 Sb10\_Sb10 CATTAAAGCAACTTAAAGGAGTTAAATTTAAGCTCTGGCAACGTGTTCAAC  
 Sbay\_c646 CATTAAAGCAACTTAAAGGAGTTAAATTTAAGCCTTGGCAACGTGTTCAAC  
 Spas\_SbYJR009C/ScYJR009C →  
 Spas\_SbYJR009C →  
 Sbay\_YJR009C →

Scer\_chr10 CAAGTCGACAACCTCTGGTAGAGTAACCGTATTCGTTGTCGTACCAGGAAA  
 Sc10\_Sc10 CAAGTCGACAACCTCTGGTAGAGTAACCGTATTCGTTGTCGTACCAGGAAA  
 Sc10\_Sb10 CAAGTCGACAACCTCTGGTAGAGTAACCGTATTCGTTGTCGTACCAGGAAA  
 Sb10\_Sc10 CAAGTCGACAACCTCTGGTAGAGTAACCGTATTCGTTATCGTACCAGGAGA  
 Sb10\_Sb10 CAAGTCGACAACCTCTGGTAGAGTAACCGTATTCGTTATCGTACCAGGAGA  
 Sbay\_c646 CAAGTCGACAACCTCTGGTAGAGTAACCGTATTCGTTATCGTACCAGGAGA

Scer\_chr10 CCAACTTGACGAAC TTTGGAGACAATTGGATACCAGCGG CAGCATCGAAG  
Sc10\_Sc10 CCAACTTGACGAAC TTTGGAGACAATTGGATACCAGCGG CAGCATCGAAG  
Sc10\_Sb10 CCAACTTGACGAAC TTTGGAGACAATTGGATACCAGCGG CAGCATCGAAG  
Sb10\_Sc10 CCAACTTGACGAAC TTTGGAGACAATTGGATACCAGCGG CAGCATCGAAG  
Sb10\_Sb10 CCAACTTGACGAAC TTTGGAGACAATTGGATACCAGCGG CAGCATCGAAG  
Sbay\_c646 CCAACTTGACGAAC TTTGGAGACAATTGGATACCAGCGG AAGCATCGAAG

Scer\_chr10 ATGGAAGAGTTAG AGTCACCCAAGAAGTCAGAGGAGACAACAGCGTCTTC  
Sc10\_Sc10 ATGGAAGAGTTAG AGTCACCCAAGAAGTCAGAGGAGACAACAGCGTCTTC  
Sc10\_Sb10 ATGGAAGAGTTAG AGTCACCCAAGAAGTCAGAGGAGACAACAGCGTCTTC  
Sb10\_Sc10 ATGGAAGAGTTAG CGTCACCCAAGAAGTCAGAGGAGACAACAGCGTCTTC  
Sb10\_Sb10 ATGGAAGAGTTAG CGTCACCCAAGAAGTCAGAGGAGACAACAGCGTCTTC  
Sbay\_c646 ATGGAAGAGTTAG CGTCACCCAAGAAGTCAGAGGAGACAACAGCGTCTTC

Scer\_chr10 AGTGTAAACCAA GACACCCTTCA A CTTACCTTCAG C GGCAGCCTTGACAA  
Sc10\_Sc10 AGTGTAAACCAA GACACCCTTCA A CTTACCTTCAG C GGCAGCCTTGACAA  
Sc10\_Sb10 AGTGTAAACCAA GACACCCTTCA A CTTACCTTCAG C GGCAGCCTTGACAA  
Sb10\_Sc10 AGTGTAAACCAA AACACCCTTCA T CTTACCTTCAG A GGCAGCCTTGACAA  
Sb10\_Sb10 AGTGTAAACCAA AACACCCTTCA T CTTACCTTCAG A GGCAGCCTTGACAA  
Sbay\_c646 AGTGTAAACCAA AACACCCTT T A CTTACCTTCAG C GGCAGCCTTGACAA

Scer\_chr10 CCTTCTTGATTTCA TCGTAGGTGGTTTCCTTGTTCAACTTGACAGTCAAG  
Sc10\_Sc10 CCTTCTTGATTTCA TCGTAGGTGGTTTCCTTGTTCAACTTGACAGTCAAG  
Sc10\_Sb10 CCTTCTTGATTTCA TCGTAGGTGGTTTCCTTGTTCAACTTGACAGTCAAG  
Sb10\_Sc10 CCTTCTTGATTTCA TCGTAGGTGGTTTCCTTGTTCAACTT AACAGTCAAG  
Sb10\_Sb10 CCTTCTTGATTTCA TCGTAGGTGGTTTCCTTGTTCAACTT AACAGTCAAG  
Sbay\_c646 CCTTCTTGATTTCA TCGTAGGTGGTTTCCTTGTTCAACTT AACAGTCAAG

Sc10 > Sb10

Scer\_chr10 TCAACAACGGAA ACATCGACGGTTGGGACTCTGAAAGCCATACCGGTCAA  
Sc10\_Sc10 TCAACAACGGAA ACATCGACGGTTGGGACTCTGAAAGCCATACCGGTCAA  
Sc10\_Sb10 TCAACAACGGAG ACATCGACGGTTGGGACTCTGAAAGCCATACCGGTCAA  
Sb10\_Sc10 TCAACAACGGAG ACATCGACGGTTGGGACTCTGAAAGCCATACCGGTCAA  
Sb10\_Sb10 TCAACAACGGAG ACATCGACGGTTGGGACTCTGAAAGCCATACCGGTCAA  
Sbay\_c646 TCAACAACGGAG ACATCGACGGTTGGGACTCTGAAAGCCATACCGGTCAA

Scer\_chr10 CTTACCTTGCAATTCTGGCAAGACCTTACCGACAGCCTTAGCAGCACCGG  
Sc10\_Sc10 CTTACCTTGCAATTCTGGCAAGACCTTACCGACAGCCTTAGCAGCACCGG  
Sc10\_Sb10 CTTACCTTGTAATTCAGGCAAGACCTTACCGACAGCCTTGGCGGCACCGG  
Sb10\_Sc10 CTTACCTTGTAATTCAGGCAAGACCTTACCGACAGCCTTGGCGGCACCGG  
Sb10\_Sb10 CTTACCTTGTAATTCAGGCAAGACCTTACCGACAGCCTTGGCGGCACCGG  
Sbay\_c646 CTTACCTTGCAATTCTGGCAAGACCTTACCGACAGCCTTGGCGGCACCGG

Scer\_chr10 TAGAGGATGGGATGATGTTACCGGAAGCGGTTCTACCACCTCTCCAGTCC  
Sc10\_Sc10 TAGAGGATGGGATGATGTTACCGGAAGCGGTTCTACCACCTCTCCAGTCC  
Sc10\_Sb10 TGAGGATGGGATGATGTTACCGGAAGCGGTTCTACCACCTCTCCAGTCC  
Sb10\_Sc10 TGAGGATGGGATGATGTTACCGGAAGCGGTTCTACCACCTCTCCAGTCC  
Sb10\_Sb10 TGAGGATGGGATGATGTTACCGGAAGCGGTTCTACCACCTCTCCAGTCC  
Sbay\_c646 TGAGGATGGGATGATGTTACCGGAAGCGGTTCTACCACCTCTCCAGTCC

Scer\_chr10 TTGTGGGATGGACC GTCAACAGTCTTTTGGTGGCGGT CATGGAGTGAAC  
Sc10\_Sc10 TTGTGGGATGGACC GTCAACAGTCTTTTGGTGGCGGT CATGGAGTGAAC  
Sc10\_Sb10 TTGTGGGATGGACCA TCGACAGTCTTTTAGTGGCGGT CATGGAGTGGAC  
Sb10\_Sc10 TTGTGGGATGGACCA TCGACAGTCTTTTAGTGGCGGT CATGGAGTGGAC  
Sb10\_Sb10 TTGTGGGATGGACCA TCGACAGTCTTTTAGTGGCGGT CATGGAGTGGAC  
Sbay\_c646 TTGTGGGATGGACCA TCGACAGTCTTTTAGTGGCGGT CATGGAGTGGAC

Scer\_chr10 AGTGGTCATCAAACCTTCTTCAATACCGAAAGCATCGTTGATAACCTTGG  
Sc10\_Sc10 AGTGGTCATCAAACCTTCTTCAATACCGAAAGCATCGTTGATAACCTTGG  
Sc10\_Sb10 AGTGGTCATCAAACCTTCTTCAATACCGAAAGCATCGTTGATAACCTTGG  
Sb10\_Sc10 AGTGGTCATCAAACCTTCTTCAATACCGAAAGCATCGTTGATAACCTTGG  
Sb10\_Sb10 AGTGGTCATCAAACCTTCTTCAATACCGAAAGCATCGTTGATAACCTTGG  
Sbay\_c646 AGTGGTCATCAAACCTTCTTCAATACCGAAAGCATCGTTGATAACCTTGG

Scer\_chr10 CCAATGGAGCCAAACAGTTGGTGGTACAAGAAGCGTTGGAACAATCTTC  
Sc10\_Sc10 CCAATGGAGCCAAACAGTTGGTGGTACAAGAAGCGTTGGAACAATCTTC  
Sc10\_Sb10 CCAATGGAGCCAAACAGTTAGTGGTACAGGAAGCGTTGGAGACAATCTTC  
Sb10\_Sc10 CCAATGGAGCCAAACAGTTAGTGGTACAGGAAGCGTTGGAGACAATCTTC  
Sb10\_Sb10 CCAATGGAGCCAAACAGTTAGTGGTACAGGAAGCGTTGGAGACAATCTTC  
Sbay\_c646 CCAATGGAGCCAAACAGTTAGTGGTACAGGAAGCGTTGGAGACAATCTTC

```
Scer_chr10 AAGTCAGAAGTGTATTTTCTTCGTAAACACCCATGACGAACATTGGGGC
Sc10_Sc10 AAGTCAGAAGTGTATTTTCTTCGTAAACACCCATGACGAACATTGGGGC
Sc10_Sb10 AAGTCAGAAGTGTATTTGTCTTCGTAAACACCCATAACGAACATTGGGGC
Sb10_Sc10 AAGTCAGAAGTGTATTTGTCTTCGTAAACACCCATGACGAACATTGGGGC
Sb10_Sb10 AAGTCAGAAGTGTATTTGTCTTCGTAAACACCCATGACGAACATTGGGGC
Sbay_c646 AAGTCAGAAGTGTATTTGTCTTCGTAAACACCCATAACGAACATTGGGGC
```

```
Scer_chr10 GGTGGAAGATGGAGCAGTGATGACAACCTTCTTGGCACCAGCGTCAATGT
Sc10_Sc10 GGTGGAAGATGGAGCAGTGATGACAACCTTCTTGGCACCAGCGTCAATGT
Sc10_Sb10 GGTGGAAGATGGAGCAGTGATGACAACCTTCTTGGCACCAGCGTCAATGT
Sb10_Sc10 GGTGGAAGATGGAGCAGTGATGACAACCTTCTTGGCACCAGCGTCAATGT
Sb10_Sb10 GGTGGAAGATGGAGCAGTGATGACAACCTTCTTGGCACCAGCGTCAATGT
Sbay_c646 GGTGGAAGATGGAGCAGTGATGACAACCTTCTTGGCACCAGCGTCAATGT
```

```
Scer_chr10 GCTTTTGAGCAGTGTCCAATTCCTTGAAAAACACCAGTGGAGTCAATGGCG
Sc10_Sc10 GCTTTTGAGCAGTGTCCAATTCCTTGAAAAACACCAGTGGAGTCAATGGCG
Sc10_Sb10 GCTTTTGAGCAGTGTCCAATTCCTTGAAAAACACCAGTGGAGTCAATGGCG
Sb10_Sc10 GCTTTTGAGCAGTGTCCAATTCCTTGAAAAACACCAGTGGAGTCAATGGCG
Sb10_Sb10 GCTTTTGAGCAGTGTCCAATTCCTTGAAAAACACCAGTGGAGTCAATGGCG
Sbay_c646 GCTTTTGAGCAGTGTCCAATTCCTTGAAAAACACCAGTGGAGTCAATGGCG
```

```
Scer_chr10 ATGTCAATGTTTAGAGAAAGCCCATGGCAAGTTAGCTGGGTCTCTTTCTTG
Sc10_Sc10 ATGTCAATGTTTAGAGAAAGCCCATGGCAAGTTAGCTGGGTCTCTTTCTTG
Sc10_Sb10 ATGTCAATCTTTAGAGAAACCCCATGGCAAGTTAGCTGGGTCTCTTTCTTG
Sb10_Sc10 ATGTCAATCTTTAGAGAAACCCCATGGCAAGTTAGCTGGGTCTCTTTCTTG
Sb10_Sb10 ATGTCAATCTTTAGAGAAACCCCATGGCAAGTTAGCTGGGTCTCTTTCTTG
Sbay_c646 ATGTCAATCTTTAGAGAAACCCCATGGCAAGTTAGCTGGGTCTCTTTCTTG
Sb10 > Sc10
```

```
Scer_chr10 GAAAGTGGCGATCTTGTGACCATCAACGATGATGTGCTTGTATCGTGGG
Sc10_Sc10 GAAAGTGGCGATCTTGTGACCATCAACGATGATGTGCTTGTATCGTGGG
Sc10_Sb10 GAAAGTAGCAATCTTTGGCCATCGACGATGATGTGTTTGTATCGTGGG
Sb10_Sc10 GAAAGTGGCGATCTTGTGACCATCAACGATGATGTGCTTGTATCGTGGG
Sb10_Sb10 GAAAGTAGCAATCTTTGGCCATCGACGATGATGTGTTTGTATCGTGGG
Sbay_c646 GAAAGTAGCGATCTTTGACCATCAACGATGATGTGTTTGTATCGTGGG
```

```
Scer_YJR009C →
Spas_ScYJR009C →
Spas_ScYJR009C/SbYJR009C →
Scer_chr10 AACTTCACCAGCGTATCTACC.....
Sc10_Sc10 AACTTCACCAGCGTATCTACC.....
Sc10_Sb10 AACTTCACCAGCGTATCTACC.....
Sb10_Sc10 AACTTCACCAGCGTATCTACC.....
Sb10_Sb10 AACTTCACCAGCGTATCTACC.....
Sbay_c646 AACTTCACCAGCGTATCTACC.....
Spas_SbYJR009C/ScYJR009C →
Spas_SbYJR009C →
Sbay_YJR009C →
```



1-8) ScXI / SbXI

Scer\_YKL045W →  
 Spas\_ScYKL045W →  
 Spas\_ScYKL045W/SbYKL045W →  
 Scer\_chr11 .....CGTTTTGTTCAAAATTAGATTTAACATGCTAACCTCCACCGATC  
 Sc11\_Sc11 .....CGTTTTGTTCAAAATTAGATTTAACATGCTAACCTCCACCGATC  
 Sc11\_Sb11 .....CGTTTTGTTCAAAATTAGATTTAACATGCTAACCTCCACCGATC  
 Sb11\_Sb11 .....CTTTCCGCTCAAAGATTAGGTTCAATATGCTGACCTCAGCCGACC  
 Sbay\_c652 .....CCTTCCGCTTAAAGATTAGGTTCAATATGCTGACCTCAACTGACC  
 Spas\_SbYKL045W →  
 Sbay\_YKL045W →

Scer\_chr11 AAACAAAATTTGTTCAATCATTGGA CTTACCCTTACTACAGTTTATCTCA  
 Sc11\_Sc11 AAACAAAATTTGTTCAATCATTGGA CTTACCCTTACTACAGTTTATCTCA  
 Sc11\_Sb11 AAACAAAATTTGTTCAATCATTGGA CTTACCCTTACTACAGTTTATCTCA  
 Sb11\_Sb11 AAACAAAATTCGTTCAATCGTTAGATCTGCCTTACTACAGTTTATTTCC  
 Sbay\_c652 AAACAAAATTCGTTCAATCGTTGGA TCTGCCTTACTACAGTTTATTTCC

Scer\_chr11 AATGAAGAAAAGGCGGAATTATCTCATCAGTTGTATCAAACAGTTTCGCG  
 Sc11\_Sc11 AATGAAGAAAAGGCGGAATTATCTCATCAGTTGTATCAAACAGTTTCGCG  
 Sc11\_Sb11 AATGAAGAAAAGGCGGAATTATCTCATCAGTTGTATCAAACAGTTTCGCG  
 Sb11\_Sb11 AACGAAGAAAAGGCGGAATTGTCACACCAGTTGTACCAAACCGTCTCAGC  
 Sbay\_c652 AACGAAGAAAAGGCGGAATTGTCGACACCAGTTGTACCAAACCGTTCAGC

Scer\_chr11 GTCTCTACAGTTCCAATTGAATTTAAACGAGGAACATCAAAGAAAACAGT  
 Sc11\_Sc11 GTCTCTACAGTTCCAATTGAATTTAAACGAGGAACATCAAAGAAAACAGT  
 Sc11\_Sb11 GTCTCTACAGTTCCAATTGAATTTAAACGAGGAACATCAAAGAAAACAGT  
 Sb11\_Sb11 TTCTTTACAGTTCCAATTGAATCTTACTGAAGAACCAAAGAAAGGAGT  
 Sbay\_c652 TTCTTTACAGTTCCAATTGAATCTTAAACGAGGAACCAAAGAAAGACAGT

Scer\_chr11 ATTTCAACAGGAAAAATTCATAAAATACCTTTCGAAAATGTGATAGAA  
 Sc11\_Sc11 ATTTCAACAGGAAAAATTCATAAAATACCTTTCGAAAATGTGATAGAA  
 Sc11\_Sb11 ATTTCAACAGGAAAAATTCATAAAATACCTTTCGAAAATGTGATAGAA  
 Sb11\_Sb11 ACTTCCAACAAGAGAAATTCATAAACTACCCTTCGAAAACGTGATAGAG  
 Sbay\_c652 ACTTCCAACAAGAGAAATTCATAAACTACCCTTCGAAAACGTGATAGAG

Scer\_chr11 CTGGTAGGAAACCGTTTAGTGTTTTTGAAGGACGGGTACGCATATTTACC  
 Sc11\_Sc11 CTGGTAGGAAACCGTTTAGTGTTTTTGAAGGACGGGTACGCATATTTACC  
 Sc11\_Sb11 CTGGTAGGAAACCGTTTAGTGTTTTTGAAGGACGGGTACGCATATTTACC  
 Sb11\_Sb11 CTAGTGGGTAACCGCTTAGTGTTTTTGAAGAACCGCTATGCTTATTTGCC  
 Sbay\_c652 CTAGTGGGTAACCGCTTAGTGTTTTTGAAGAACCGCTATGCTTATTTGCC

Scer\_chr11 ACAATTCAGCAATGAATTTACTTTCTAATGAGTTTGCTAGCAAATGA  
 Sc11\_Sc11 ACAATTCAGCAATGAATTTACTTTCTAATGAGTTTGCTAGCAAATGA  
 Sc11\_Sb11 ACAATTCAGCAATGAATTTACTTTCTAATGAGTTTGCTAGCAAATGA  
 Sb11\_Sb11 GCGGTTCCAACAGCTGAATTTGCTATCCAATGAATTTGCTAGTAAATGA  
 Sbay\_c652 ACAGTTCCAACAACCTGAATCTGCTGTTCTAATGAGTTTGCTAGTAAATGA

Scer\_chr11 ACCAGGAGTTAATAAAAACGTACCAGTACTTACCAAGACTGAATGAGGAT  
 Sc11\_Sc11 ACCAGGAGTTAATAAAAACGTACCAGTACTTACCAAGACTGAATGAGGAT  
 Sc11\_Sb11 ACCAGGAGTTAATAAAAACGTACCAGTACTTACCAAGACTGAATGAGGAT  
 Sb11\_Sb11 ACGAGGAGCTATTGAAGGCTACCAGTACTTCCAAGACTGAACGAAGAT  
 Sbay\_c652 ACGAGGAGCTATTGAAGACTACCAGTACTTCCAAGATTGAACGAGGAT

Scer\_chr11 GACCGGTTGTTACCAATTCTAATCATCTTTTCGTCGGGTACACTATCGC  
 Sc11\_Sc11 GACCGGTTGTTACCAATTCTGAATCATCTTTTCGTCGGGTACACTATCGC  
 Sc11\_Sb11 GACCGGTTGTTACCAATTCTGAATCATCTTTTCGTCAGGATACACAATTCG  
 Sb11\_Sb11 GACAGGTTGCTGCCAATTTAAACCATCTTTTCGTCAGGATACACAATTCG  
 Sbay\_c652 GACAGGTTGCTGCCGATTTAAACCATCTTTTCGTCAGGATACACAATTCG

Sc11 > Sb11

Scer\_chr11 GGATTTCAACCAGCAAAGGCAAACCAATTCAGTGAGAACGTAGATGATG  
 Sc11\_Sc11 GGATTTCAACCAGCAAAGGCAAACCAATTCAGTGAGAACGTAGATGATG  
 Sc11\_Sb11 AGACTTTAACCAGCAAAGGCAAACCAATTCGGTGAAAATGTAGACGATG  
 Sb11\_Sb11 AGACTTTAACCAGCAAAGGCAAACCAATTCGGTGAAAATGTAGACGATG  
 Sbay\_c652 GGATTTAACCAGCAAAGGCAAACCAATTCGGTGAAAATGTAGACGATG

Scer\_chr11 AGATTAATGCGCAAAGTGTCTGGTCTGAAGAGATTAGCTCAAACATATCCG  
Sc11\_Sc11 AGATTAACGCGCAAAGTGTCTGGTCTGAAGAGATTAGCTCAAACATATCCG  
Sc11\_Sb11 AAATAAATGCACAAAGTGTGTGGTCCGAGGAGATCAGCTCGAATTATCCA  
Sb11\_Sb11 AAATAAATGCACAAAGTGTGTGGTCCGAGGAGATCAGCTCGAATTATCCA  
Sbay\_c652 AAATAAATGCACAAAGTGTGTGGTCCGAGGAGATTAGCTCAAACATATCCCT

Scer\_chr11 CTATGTATCAAAAACCTGATGGAGGGTCTTAAAAAGAACCATCATTGAG  
Sc11\_Sc11 CTATGTATCAAAAACCTGATGGAGGGTCTTAAAAAGAACCATCATTGAG  
Sc11\_Sb11 TTGAGTATCAAAAACCTAATGGAGGGTTTGAAGAAAACCATCATTGAG  
Sb11\_Sb11 TTGAGTATCAAAAACCTAATGGAGGGTTTGAAGAAAACCATCATTGAG  
Sbay\_c652 TTGAGTATCAAAAACCTGATGGAGGGTTTGAAGAAAACCATCATTGAG

Scer\_chr11 GTATTATGGGAGCAACAACCTGAGTCTGTTTTTGAAAGGTATCGGCCCTGA  
Sc11\_Sc11 GTATTATGGGAGCAACAACCTGAGTCTGTTTTTGAAAGGTATCGGCCCTGA  
Sc11\_Sb11 ATATTACGGTAGGCAACAACCTAAGCCTGTTTTCTAAAGGGAATTGGGTGA  
Sb11\_Sb11 ATATTACGGTAGGCAACAACCTAAGCCTGTTTTCTAAAGGGAATTGGGTGA  
Sbay\_c652 ATATTACGGTAGGCAACAACCTAAGCCTGTTTTCTAAAGGGAATTGGATGA

Scer\_chr11 GCGCTGATGAAGCGTTAAAATTTTGGTCTGAGGCATTTACAAGAAATGGG  
Sc11\_Sc11 GCGCTGATGAAGCGTTAAAATTTTGGTCTGAGGCATTTACAAGAAATGGG  
Sc11\_Sb11 GCGCCGACGAAGCTTTGAAATTTTGGTCAGAAGCTTTCACAAGAAACGGC  
Sb11\_Sb11 GCGCCGACGAAGCTTTGAAATTTTGGTCAGAAGCTTTCACAAGAAACGGC  
Sbay\_c652 GTGCCGATGAAGCTTTGAAATTTTGGTCAGAAGCTTTCACAAGAAACGGC

Scer\_chr11 AACATGACAATGGAGAAGTTCAATAAAGAATACCGTTACAGCTTCAGGCA  
Sc11\_Sc11 AACATGACAATGGAGAAGTTCAATAAAGAATACCGTTACAGCTTCAGGCA  
Sc11\_Sb11 AACATGACGATGGAAAAGTTCAATAAAGAGTACCGCTACAGTTTTAGACA  
Sb11\_Sb11 AACATGACGATGGAAAAGTTCAATAAAGAGTACCGCTACAGTTTTAGACA  
Sbay\_c652 AACATGACGATGGAAAAGTTCAATAAAGAGTACCGCTACAGTTTTAGACA

Scer\_chr11 TAATTACGGTCTTGAAGGTAACAGAATCAACTACAAACCATGGGACTGTC  
Sc11\_Sc11 TAATTACGGTCTTGAAGGTAACAGAATCAACTACAAACCATGGGACTGTC  
Sc11\_Sb11 CAACTACGGCCTCGAAGGTAACAGAATCAACTACAAACCGTGGGACTGTC  
Sb11\_Sb11 CAACTACGGCCTCGAAGGTAACAGAATCAACTACAAACCGTGGGACTGTC  
Sbay\_c652 CAACTACGGTCTCGAAGGTAACAGAATTAECTACAAACCATGGGACTGTC

Scer\_YKL045W→  
Spas\_ScYKL045W→  
Spas\_ScYKL045W/SbYKL045W→  
Scer\_chr11 ACACATATCCTTCCAAAGCCAGACCTGGCGCGGAGATTATCATG.....  
Sc11\_Sc11 ACACATATCCTTCCAAAGCCAGACCTGGCGCGGAGATTATCATG.....  
Sc11\_Sb11 ACACCATTCATCTAAGCCAGACCCGGCCGCGCGATTATCAG.....  
Sb11\_Sb11 ACACCATTCATCTAAGCCAGACCCGGCCGCGCGATTATCAG.....  
Sbay\_c652 ACACCATTCCTCCAAAGCCAGACCCGGCCGCGGACTATCAG.....  
Spas\_SbYKL045W→  
Sbay\_YKL045W→

1-9) ScXIII / SbXIII

```

      ← Scer_YMR302C
      ← Spas_ScYMR302C
Scer_chr13  ....TCTACAGTTTCAAACCACAACCTTTAATAAGTAAACGGGTTTT
Sc13_Sc13  ....TCTACAGTTTCAAACCACAACCTTTAATAAGTAAACGGGTTTT
Sb13_Sc13  ....CCTGCCGTTTCAAACCACAACCTTTAATAAGTAAACGGGTTTT
Sbay_c671  ....CCTGCCGTTTCAAACCACAACCTTTAATAAGTAAACGGGTTTT
      ← Spas_SbYMR302C/ScYMR302C
      ← Sbay_YMR302C

Scer_chr13  TAGCACTTTTGCAGTTCAGGATCGTTGATCAAGTATGTGAATGCTGCC
Sc13_Sc13  TAGCACTTTTGCAGTTCAGGATCGTTGATCAAGTATGTGAATGCTGCC
Sb13_Sc13  CAACACCTTTGAAAGTTCAGCATCGTTAATCAAATATGTGAATGCTGCTC
Sbay_c671  CAACACCTTTGAAAGTTCAGCATCGTTAATCAAATATGTGAATGCTGCTC

Scer_chr13  TGTATAGCGTTTGGCAGGCTGATTCCTGTAAAACACCCCTATCTCTA
Sc13_Sc13  TGTATAGTGGTTTGGCAGGCTGATTCCTGTAAAACACCCCTATCTCTA
Sb13_Sc13  TGTATAGTGGTTTGGCAGGCTAATTCCTGTAAAACACCCCTATCCCTG
Sbay_c671  TGTATAGTGGTTTGGCAGGCTAATTCCTGTAAAACACCCCTATCCCTG

Scer_chr13  GATACAGTATTAAACCATTAATTCCTCAATTCATGATTCCTGTTCTGG
Sc13_Sc13  GATACAGTATTAAACCATTAATTCCTCAATTCATGATTCCTGTTCTGG
Sb13_Sc13  GACACAGTGATTAAACCATGTTTCCAGTTCATGATTCCTGTTCTGG
Sbay_c671  GACACAGTGATTAAACCATGTTTCCAGTTCATGATTCCTGTTCTGG

Scer_chr13  TGCAGCTTTGAATAATGGCTGTTAACGATTTTCATGGAATGGAATGACTG
Sc13_Sc13  TGCAGCTTTGAATAATGGCTGTTAACGATTTTCATGGAATGGAATGACTG
Sb13_Sc13  AGCCGCCTTGAATAATGGCATATTAACAACCTTCGTGGAATGGAAGCACTG
Sbay_c671  AGCCGCCTTGAATAATGGCATATTAACAACCTTCGTGGAATGGAAGCACTG

Scer_chr13  GGTTCGCACTCAATAATTCGATTAATTCCTCAAGGCTTGTGCACTTTTATTG
Sc13_Sc13  GGTTCGCACTCAATAATTCGATTAATTCCTCAAGGCTTGTGCACTTTTATTG
Sb13_Sc13  GATGGAACTCAATAATTCGATCAGTTCCCAAGCTTGGCACTCTTTGTA
Sbay_c671  GATGGAACTCAATAATTCATCAGTTCCCAAGCTTGGCACTCTTTGTA

Scer_chr13  CTGTCAATCTTGTCACTTAAAAACATTTGAGTTATTGCTCAGAAGCCTG
Sc13_Sc13  CTGTCAATCTTGTCACTTAAAAACATTTGAGTTATTGCTCAGAAGCCTG
Sb13_Sc13  CCATCAATTTTGTCACTCAAAAAACATTTGAGTTATCTGTTCAAGAAGCCTG
Sbay_c671  CCATCAATTTTGTCACTCAAAAAACATTTGAGTTATCTGTTCAAGAAGCCTG

Scer_chr13  TTCAATCATTTTGTCTACTGCTTCCGAGGGCTCTTCTCCTGACTTTACCC
Sc13_Sc13  TTCAATCATTTTGTCTAATGCTTCCGAGGGCTCTTCTCCTGACTTTACCC
Sb13_Sc13  TTCAATCATCTTGTCTAGCGCTTCCGTTAGGCTCTTCTCCTGATTTGACTC
Sbay_c671  TTCAATCATCTTGTCTAGCGCTTCCGTTAGGCTCTTCTCCTGATTTGACTC

Scer_chr13  TTCTTACAAATGCTGTAAAGTCTAACATCTACCACCCAATGGCTCTAA
Sc13_Sc13  TTCTTACAAATGCTGTAAAGTCTAACATCTACCACCCAATGGCTCTAA
Sb13_Sc13  TTCTTACAAATGCTTGCATCTAACATCTACCACCCAATGGCTCTAA
Sbay_c671  TTCTTACAAATGCTTGTAAATCTAACATCTACCACCCAATGGCTCTAA

Scer_chr13  GAAGCGTCAATTTCTGTAAATTCCTTTTCAATTTAAAATAACCTCAGCTTT
Sc13_Sc13  GAAGCGTCAATTTCTGTAAATTCCTTTTCAATTTAAAATAACCTCAGCTTT
Sb13_Sc13  GAAGCGTCAATTTCTGTAAATTCCTTTTCAATTTAAAATAACCTCAGCTTT
Sbay_c671  GAAGCGTCAATGCTTGCAGTTTCCTTTTCAATTTAAAATAACCTCAGCTTT
sb13 > sc13

Scer_chr13  TTTGACACTCGTATC---GGCCTCACTA---TCAGAATCATATTTTCAG
Sc13_Sc13  TTTGACACTCGTATC---GGCCTCACTA---TCAGAATCATATTTTCAG
Sb13_Sc13  TTTGACACTCGTATC---GGCCTCACTA---TCAGAATCATATTTTCAG
Sbay_c671  CTTCTTATCTGAATTCAGTATCATTAGCCTCAGAATCATCGTTTTTCAT

Scer_chr13  CAGTTTCCTTTTCTGATTCAGGTTCTTTTACGTTTTCACCTTGGATTTT
Sc13_Sc13  CAATTTCTTTTCTGATTCAGGTTCTTTTACGTTTTCACCTTGGATTTT
Sb13_Sc13  CAATTTCTTTTCTGATTCAGGTTCTTTTACGTTTTCACCTTGGATTTT
Sbay_c671  TCTTTTCTTTTCTCTTCAACTTCTTTGCGTCTTCTCCCTTGACCTTC

```

Scer\_chr13 TTATTGTAATATAAGTAAATCCTCCAATTGGGATAATACATAGTTCTCTCGA  
Sc13\_Sc13 TTATTGTAATATAAGTAAATCCTCCAATTGGGATAATACATAGTTCTCTCGA  
Sb13\_Sc13 TTATTGTAATATAAGTAAATCCTCCAATTGGGATAATACATAGTTCTCTCGA  
Sbay\_c671 CTGTTGAAATCAAGTACTCTTCCAATTGGGACAAACACATAATTTCTCGA

Scer\_chr13 ATTCCTTTTGGGCATCTGATAGGATTAGGTTTTTGAAGACTTGATTGG  
Sc13\_Sc13 ATTTCTTTTGGGCATCTGATAAAATTAAGTTTTTGAAGACTTGATTGG  
Sb13\_Sc13 ATTTCTTTTGGGCATCTGATAAAATTAAGTTTTTGAAGACTTGATTGG  
Sbay\_c671 ATTTCTTTCGACGCATCTGATAAAATCAAATTTGAACTTGATTGG

Scer\_chr13 GTAGTGATTCGCTCAATCTTTGGTTGGATGCAACGGTTTCCGTTAAGAAA  
Sc13\_Sc13 GTAGTGACTCGCTCAATCTTTGGTTGGATGCAACGGTTTCCGTTAAGAAA  
Sb13\_Sc13 GTAGTGACTCGCTCAATCTTTGGTTGGATGCAACGGTTTCCGTTAAGAAA  
Sbay\_c671 GCAGTGACTCACTTAATCTTTGGTTGGATGCGACAGTTTCTGTCAAGAAA

Scer\_chr13 ATCACATGAGCAATATTCATTTGAAC TAGCATAGCTGCCAATCGGATAG  
Sc13\_Sc13 ATCACATGAGCAATATTCATTTGAAC TAGCATAGCTGCCAATCGGATAG  
Sb13\_Sc13 ATCACATGAGCAATATTCATTTGAAC TAGCATAGCTGCCAATCGGATAG  
Sbay\_c671 ATCACATGTGCAATGTTCAATTTGAAC TAGCATAGCTGCCAATCAGATAA

Scer\_chr13 TTCTTTATACACAAATCCATTATTTCCGACTTGCCCTCAAACCTATCTA  
Sc13\_Sc13 TTCTTTATACACAAATCCATTATTTCCGACTTGCCCTCAAACCTATCTA  
Sb13\_Sc13 TTCTTTATACACAAATCCATTATTTCCGACTTGCCCTCAAACCTATCTA  
Sbay\_c671 TTCTTTGTACACAAATCCATTAAATTCAGATTTACCCTCAAACCTATCTA

Scer\_chr13 TGACGATAACGGGTTTAGCTTCCGGATGTTGCTGTAGGTAATCTTCTTCC  
Sc13\_Sc13 TGACGATAACGGGTTTAGCTTCCGGATGTTGCTGTAGGTAATCTTCTTCC  
Sb13\_Sc13 TGACGATAACGGGTTTAGCTTCCGGATGTTGCTGTAGGTAATCTTCTTCC  
Sbay\_c671 TAACAATAACAGGCTTAGCTTCTGGATGTTGTTGCAAGTAATCTTCTTCT

Scer\_chr13 TTAACATTAAGTGTCCCATCACCGGTGGAAACAAAAGCCTTGTAATTCTT  
Sc13\_Sc13 TTAACATTAAGTGTCCCATCACCGGTGGAAACAAAAGCCTTGTAATTCTT  
Sb13\_Sc13 TTAACATTAAGTGTCCCATCACCGGTGGAAACAAAAGCCTTGTAATTCTT  
Sbay\_c671 TTAATATTAAGTGTCTCCGTCGCTGGTGGAAATGAAGCCTTGTAATTCTT

Scer\_chr13 GAGAGCAATACGTCTAATGGACATCAATGAGGTAGTTAACATGTTTCTAA  
Sc13\_Sc13 GAGAGCAATACGTCTAATGGACATCAATGAGGTAGTTAACATGTTTCTAA  
Sb13\_Sc13 GAGAGCAATACGTCTAATGGACATCAATGAGGTAGTTAACATGTTTCTAA  
Sbay\_c671 AAGGCAATGCGTCTAATCGACATCAATGAAGTGGTCAACATAATTTCTAA

Scer\_chr13 ACCGAGATTCCTTCGT .....  
Sc13\_Sc13 ACTGAGATTCCTTCGT .....  
Sb13\_Sc13 ACTGAGATTCCTTCGT .....  
Sbay\_c671 ATTGAGATTC TTTTGT .....  
← Scer\_YMR302C  
← Spas\_ScYMR302C  
← Spas\_SbYMR302C/ScYMR302C  
← Sbay\_YMR302C

1-10) ScXVI / SbXVI

Scer\_chr16 GATTC TTCGCGT TTTGTATGACACACTAGACGCG-----TCGGAAT  
 Sc16\_Sc16 GATTC TTCGCGT TTTGTATGACACACTAGACGCG-----TCGGAAT  
 Sc16\_Sb16 GATTC TTCGCGT TTTGCATGACACACTAGACGCG-----TCGGAAT  
 Sbay\_c637 CTTTT TTCGCGTCTTGAATAAATAACCTAAGCGCGCCCCCGCTTTCGCTAT

Scer\_chr16 --AGT---GA-----AAACTCTAAAAAAT-----ACATTGTAATGT  
 Sc16\_Sc16 --AGT---GA-----AAACTCTAAAAAAT-----ACATTGTAATGT  
 Sc16\_Sb16 --AGT---G--A-----AAACTCTAGAAAAAT-----ACATTGTAATGT  
 Sbay\_c637 GTAGT TGC GATACTTCGAAATTCATTTAAAATTTTTTACTTTCATGTGT

Scer\_chr16 T-----TTACCCAGTTATTTCCATGCAGATGCCCTATTTACATACTTATTT  
 Sc16\_Sc16 T-----TTACCCAGTTATTTCCATGCAGATGCCCTATTTACATACTTATTT  
 Sc16\_Sb16 T-----TTACCCAGTTATTTCCATGCAGATGCCCTACTTACATACTTATTT  
 Sbay\_c637 TTTTT TTACCTAGTTTATTTTATGCAGATGCCCTATTTACACTTTTACT-

Scer\_chr16 ATTCATT CGAATACCTATACGTTATATTA--TGTTTTGTTTA-----TAA  
 Sc16\_Sc16 ATTCATT CGAATACCTATACGTTATATTA--TGTTTTGTTTA-----TAA  
 Sc16\_Sb16 ATTCATT CGAATACCTATACGTTATATTA--TGTTTTGTTTA-----TAA  
 Sbay\_c637 ATTTATT CGAATACTTATACGTTACGTTATATGTTTTGTTTGCAACC TAA

Scer\_chr16 CCTAT TCAAGGCCATGATGTTCT--TACCTAATCTACCTCTTCCATTTCG  
 Sc16\_Sc16 CCTAT TCAAGGCCATGATGTTCT--TACCTAATCTACCTCTTCCATTTCG  
 Sc16\_Sb16 CCTAT TCAAGGCCATGATGTTCT--TACCTAATCTACCTCTTCCATTTCG  
 Sbay\_c637 CCTAATCAGGG--ATGAGGCTCTTACCTAATCGACTCTTCCATTTCG

← Scer\_YPL240C  
 ← Spas\_ScYPL240C  
 ← Spas\_ScYPL240C/SbYPL240C

Scer\_chr16 GTGTCAGCTGGAACCTCTTCAACCGGAGCTGCGGTGGATGCTTCTGGAGC  
 Sc16\_Sc16 GTGTCAGCTGGAACCTCTTCAACCGGAGCTGCGGTGGATGCTTCTGGAGC  
 Sc16\_Sb16 GTGTCAGCTGGAACCTCTTCAACCGGAGCTGCGGTGGATGCTTCTGGAGC  
 Sbay\_c637 GTGTCAGCTGGGACTTCTTCGACTGGAGCATCAGTAGCTGCATCAGTAGC

Scer\_chr16 AGTCTCTGTTTCTTTCATCCTCATCAATGTTCAAACCCAAAGAGATCAATC  
 Sc16\_Sc16 AGTCTCTGTTTCTTTCATCCTCATCAATGTTCAAACCCAAAGAGATCAATC  
 Sc16\_Sb16 AGTCTCTGTTTCTTTCATCCTCATCAATGTTCAAACCCAAAGAGATCAATC  
 Sbay\_c637 AGCTTCAGTCTCTTCTTCTTCATCAATGTTCAAACCCAAAGAAATCAATC

Scer\_chr16 TGTTAAT TCTTGATGCAAAAGGAGTTGGTTCGTCCAAC TGAAACCGGAA  
 Sc16\_Sc16 TGTTAAT TCTTGATGCAAAAGGAGTTGGTTCGTCCAAC TGAAACCGGAA  
 Sc16\_Sb16 TGTTAAT TCTTGATGCAAAAGGAGTTGGTTCGTCCAAC TGAAACCGGAA  
 Sbay\_c637 TGTTAAT TCTTGAGCAAAAGGAGTTGGTTCGTCCAAC TGAAACCGGAA

Scer\_chr16 GTCAACA AAGCAGTTTCATATAATAACTTAGTCAAGTCCTTGACAGTCTT  
 Sc16\_Sc16 GTCAACA AAGCAGTTTCATATAATAACTTAGTCAAGTCCTTGACAGTCTT  
 Sc16\_Sb16 GTCAACA AAGCAGTTTCATATAATAACTTAGTCAAGTCCTTGACAGTCTT  
 Sbay\_c637 GTTAAACA GAGCGTTTCGATAATAAGTTGGTCAAATCCTTGACAGTCTT

Scer\_chr16 GTCTTGAGCACCACCTTCGTCAACTCTCTTTTTCAATTCCTTGATAATTG  
 Sc16\_Sc16 GTCTTGAGCACCACCTTCGTCAACTCTCTTTTTCAATTCCTTAATAATTG  
 Sc16\_Sb16 GTCTTGAGCACCACCTTCGTCAACTCTCTTTTTCAATTCCTTGATAATTG  
 Sbay\_c637 ATCTTGAGCACCACCTTCGTCAACTCTCTTTTTCAATTCCTTGATGATTG

Scer\_chr16 GAGATTTTGGAGAAATTTGAAAAGTCTTCTTGGAAGACATGTAGGAGGAC  
 Sc16\_Sc16 GAGATTTTGGAGAAATTTGAAAAGTCTTCTTGGAAGACATGTAGGAGGAC  
 Sc16\_Sb16 GAGATTTTGGAGAAATTTGAAAAGTCTTCTTGGAAGACATGTAGGAGGAC  
 Sbay\_c637 GGGATTTTGGAGATATTTCAAATGTCCTTCTTGGAAGACATGTAGGAGGAC

Scer\_chr16 ATGGAAGAGTCTCTCAAGGCTTGAGCCTTCATGATTCTTTCCATGTTAGC  
 Sc16\_Sc16 ATGGAAGAGTCTCTCAAGGCTTGAGCCTTCATGATTCTTTCCATGTTAGC  
 Sc16\_Sb16 ATGGAAGAGTCTCTCAAGGCTTGAGCCTTCATGATTCTTTCCATGTTAGC  
 Sbay\_c637 ATGGAAGAGTCTCTCAAGGCTTGTGCCTTCATAATTCTTTCCATGTTAGC

Scer\_chr16 AGACCAACCAAATTGACAGTTCTGATAGCAGCTGGGGCATCCAACAATT  
Sc16\_Sc16 AGACCAAGCCGAATTGACAGTTCTGATGGCAGCTGGAGCATCTAGCAATT  
Sc16\_Sb16 AGACCAACCAAATTGACAGTTCTGATAGCAGCTGGGGCATCCAACAATT  
Sbay\_c637 GGACCAACCGAATTGCCAGTTCTGATGGCAGCTGGGGCGTCCACTAGTT

Scer\_chr16 TGTAAGAAACAACAACCTTCTCCACTTGGTCACCCAAATTTCTTTCAAG  
Sc16\_Sc16 TGTAAGAAACAACAACCTTCTCCACTTGGTCACCCAAATATCTTTCAAG  
Sc16\_Sb16 TGTAAGAAACAACAACCTTCTCCACTTGGTCACCCAAATTTCTTTCAAG  
Sbay\_c637 TGTAAGAAACAACAACCTTTCAACTTGGTCACCCAAATGCTTTTCAAG

Scer\_chr16 GCCTTGGTCAATGGTTCATATTCTTTGATCTCCTTCTCTTTTCAAGCTTT  
Sc16\_Sc16 GCCTTGGTCAATGGTTCATATTCTTTGATCTCCTTCTCTTTTCAAGCTTT  
Sc16\_Sb16 GCCTTGGTCAATGGTTCATATTCTTTGATCTCCTTCTCTTTTCAAGCTTT  
Sbay\_c637 GCCTTGGTCAATGGTTCGAATCTTTAACTTCCTTTCTCTTTTCAAGCTTT

Scer\_chr16 TTCTTCGTCAGTTTCTTCCAATTCGAAATCTTAGTAATGTC AACCAAAG  
Sc16\_Sc16 TTCTTCGTCAGTTTCTTCCAATTCGAAATCTTAGTAATGTC AACCAAAG  
Sc16\_Sb16 TTCTTCGTCAGTTTCTTCCAAGTTCGAAATCTTAGTAATGTC AACCAAAG  
Sbay\_c637 CTCTTCGTCAGTTTCTTCCAAGTTCGAAATCTTAGTAATGTC AACCAAAG  
Sc16 > sb16

Scer\_chr16 TTTTACCTTCGAATTCCTTCAATTGAGTGAAAGCGTATTTCATCAATTGGG  
Sc16\_Sc16 TTTTACCTTCGAATTCCTTCAATTGAGTGAAAGCGTATTTCATCAATTGGG  
Sc16\_Sb16 TTTTACCTTCGAATTCCTTCAATTGGTGAAAGCGTATTTCATCGATTGGA  
Sbay\_c637 TTTTACCTTCGAATTCCTTCAATTGAGTGAAAGCGTATTTCATCGATTGGA

Scer\_chr16 TCGGTCAAGAACAAAACCTCGAAGTTT TAGCCTTCAAGGCATCCAAA  
Sc16\_Sc16 TCGGTCAAGAACAAAACCTCAAGTTT TAGCCTTCAAGGCATCCAAAGAA  
Sc16\_Sb16 TCAGTCAAGAACAAAACCTCAAGTTT TAGCCTTCAAGGCATCCAAAGAA  
Sbay\_c637 TCAGTCAAGAACAAAACCTCAAGTTT TAGCTTTCAAGGCATTAAGAA

Scer\_chr16 TGGAGACTTTTCGACAGCCTT TAGAGATTCACCAAGTGATG TAGTAGATGT  
Sc16\_Sc16 TGGAGACTTTTCGACTGCCTT TAGAGATTCACCGGTGATG TAATAGATGT  
Sc16\_Sb16 TGGGATTTTTCACAGCCTT TAGAGATTCACCTGTGATG TAGTAAATGT  
Sbay\_c637 TGGGATTTTTCACAGCCTTCAAGACTCACCTGTGATATAGTAGATGT

Scer\_chr16 TCTTTTGGTGTCTGGCATTCTGGTAACGTAATCAGTTAAGGAAGTCAAC  
Sc16\_Sc16 TCTTTTGGTGTCTGGCATTCTAGTAACGTAATCAGTCAAGGAAGTCAAT  
Sc16\_Sb16 TCTTTTGGTGTCTGGCATTCTGGTATGTAATCGGTCAAAGAAGTAAAT  
Sbay\_c637 TCTTTTGGTGTCTGGCATTCTGGTAATAATAATCAGTCAAAGAAGTCAAT

Scer\_chr16 TCATCTACGGACTTGGTAGAGTTGTAACGTAAACAATTAGCCAAAGCAGC  
Sc16\_Sc16 TCATCGACAGATTTAGTAGAATTGTAACGTAGCAACTTAGCTAAAGCAGC  
Sc16\_Sb16 TCGTCGACGGACTTGGTGGAGTTGTAACGTAGTAACTTAGCCAAAGCAGC  
Sbay\_c637 TCGTCAACGGACTTGGTGGAGTTGTAACGTAGCAATTTGCCAAAGCAGC

Scer\_chr16 CCTGTTTTGGGTATCTTCATGTACACCCAACTTGATAATTTGGAGAAAG  
Sc16\_Sc16 TCTGTTTTGAGTGTCTTCATGTACACCCAGCTTAATGTTCTTAGCGAAGG  
Sc16\_Sb16 TCTGTTTTGAGTGTCTTCGTTGGACACCCAAATTTGATGTTCTTAGCGAAGG  
Sbay\_c637 TCTGTTTTGAGTGTCTTCATGTAACACCCAAATTTGATGTTCTTAGCGAAGG

Scer\_chr16 CCGAGTAGAACTTTTCAAATGTTTCAGAGTCTT CAGCAATTT CGTTGAAG  
Sc16\_Sc16 CAGAGTAAAATTTGTCAAATGCTCGGAGTCTT CAGCGATTT CGTTGAAG  
Sc16\_Sb16 CAGAGTAGAACTTTTCAAATGTTTCAGAGTCTT CAGCAATTT CGTTGAAA  
Sbay\_c637 CAGAGTAGAACTTTTCAAATGTTTCAGAGTCTT CAGCGATTT CGTTGAAG

Scer\_chr16 GCTTCAATCAACTTTTGGACAATGTTCTTTCTAATAACCTTCATGATCTT  
Sc16\_Sc16 GCTTCAATCAATTTCTTGGACAATATTCTTTCTAATAACCTTCATATCTT  
Sc16\_Sb16 GCTTCAATCACTTCTTGGAGATGTTCTTTCTGATAACCTTCATGATCTT  
Sbay\_c637 GATTCAATCACTTCTTAAACGATGTTCTTTCTGATGACCTTCATGATCTT

Scer\_chr16 ATTTTGTGTAAACATTTCTCTGGACAATTCAATGGTAAATCTTCAGAGT  
Sc16\_Sc16 ATTTTGTGTAAACATTTCTCTGGACAATTCAATGGTAAATCTTCAGAGT  
Sc16\_Sb16 GTTTTGTGTAGCATTTCTCTGGACAAGTTCAATGGTAAATCTTCAGAGT  
Sbay\_c637 GTTTTGTGTCAACATTTCTCTGGACAAGTTCAATGGTAAATCTTCAGAGT

Scer\_chr16 CAACAACACCCTTGACGAAAGATAACCACTCTGGAATCAAGTCTTCAGCT  
Sc16\_Sc16 CAACAACACCCTTGACGAAAGATAACCACTCTGGAATCAAGTCTTCAGCT  
Sc16\_Sb16 CAACAACACCCTTGACAAAGGACATCCATCTCTGGGATCAAGTCTTCAGCT  
Sbay\_c637 CAACAACACCCTTGACGAATGACATCCATCTCTGGAACCAAGTCTTCTGCT

Scer\_chr16 TCATCAGTGATGAAAACACGACGAACGTACAACCTTGATATTATTCTTCTT  
Sc16\_Sc16 TCATCAGTGATGAAACACGACGAACGTACAACCTTGATATTGTTCTTCTT  
Sc16\_Sb16 TCGTCGGTGATGAAAACACGACGAACATACAACCTTGATGTTGTTCTTCTT  
Sbay\_c637 TCGTCGGTGATGAAAACACGACGAACGTACAACCTAATGTTGTTCTTCTT

Scer\_chr16 CTTTCTTACTCTCAAAACAAGTCGAATGGTGTCTCTTTGGAATGAATAAGA  
Sc16\_Sc16 CTTCTTACTCTCAAAACAAGTCGAATGGTGTCTCTTTGGAATGAACAAGA  
Sc16\_Sb16 CTTCTTACTTTTGAATAAGTCGAATGGAGCTCTCTTTGGAATGTACAAGA  
Sbay\_c637 CTTCTTACTTTTGAATAGGTCGAATGGAGCTCTCTTTGGAATGTACAAGA

Scer\_chr16 TAGCTCTAAATTCGAATGACCTTCAACGAGAAATGCCTAACGTACAAT  
Sc16\_Sc16 TAGCTCTAAATTCGAATGACCTTCAACGAGAAATGCCTAACGTACAAT  
Sc16\_Sb16 TGGCTCTGAATTCGAATGACCTTCAACGAGAAATGCCTAACATATAGT  
Sbay\_c637 TAGCTCTGAATTCGAATGACCTTCAACGAGAAATGCCTAACATATAGT

Scer\_chr16 GGGTCTTCCAGTCGTTTGAATAGACTTATAGAAAGCATTGTATTCTTC  
Sc16\_Sc16 GGGTCTTCCAGTCGTTAGAAATAGACTTATAGAAAGCATTGTATTCTTC  
Sc16\_Sb16 GGGTCTTCCCAATCGTTGAGATGGATTGTAGAAAGCATTGTATTCTTC  
Sbay\_c637 GGGTCTTCCAGTCGTTGAGATGGATTGTAGAAAGCATTGTATTCTTC

Scer\_chr16 TTGAGTGATATCAGATGGGTTTCTAGTCCACAAGGCTTAGTCTTGTTTA  
Sc16\_Sc16 TTGAGTGATATCAGATGGGTTTCTAGTCCATAATGGCTTAGTCTTGTTCA  
Sc16\_Sb16 TTCGGTGATTTTCGATGGGTTTCTGGTCCATAGAGGCTTAGTCTTGTTTA  
Sbay\_c637 TTCGGTAATTTTCGATGGGTTTCTGGTCCATAAAGGCTTAGTCTTGTTTA

Scer\_chr16 GTTCTTCTAATCTTGAACCTTCTTCTTAACTTTTTTCTGTTTGGCTTC  
Sc16\_Sc16 ACTCTTCTAATCTTGAACCTTCTTCTTAACTTTTTTGGTTTGGCTTC  
Sc16\_Sb16 GTTCTTCTAATCTTGAACCTTCTTCTTAACTTTTTTGGTTTGGCTTC  
Sbay\_c637 GTTCTTCTAATCTTGAACCTTCTTCTTAACTTTTTTGGTTTGGCTTC

Scer\_chr16 TTTTCTCTTCTTC---ATCGACTTCTTCCAATTTGGTTTCTTGTGCTC  
Sc16\_Sc16 TTTTCTCTTCTTCTTCATCGACTTCTTCCAATTTGGTTTCTTGTGCTC  
Sc16\_Sb16 TTTTCTCTTCTTCTTCATCGACTTCTTCCAATTTGGTTTCTTGTGCTC  
Sbay\_c637 TTTTCTCTTCTTCTTCATCGACTTCTTCCAATTTGGTTTCTTGTGCTC

Scer\_chr16 TTCATCCTTCTTTTCTCATCTTCTTTTCTCGTCTTTCTTTCTTCTT  
Sc16\_Sc16 TTCATCCTTCTTTTCTCATCTTCTTTTCTCGTCTTTCTTTCTTCTT  
Sc16\_Sb16 TTCATCCTTCTTTTCTTCGTCCTTCTTTTCTTC-----TTCTTCTT  
Sbay\_c637 TTCATCCTTCTTTTCTTCGTCCTTCTTTTCTTCACC-----TTCTTCTT

Scer\_chr16 CTGGAATGGAACCTCCTTTTCAACTTCCTTGGTGACTAATTGGATT  
Sc16\_Sc16 CTGGAATGGAACCTCCTTTTCAACTTCCTTGGTGACTAGAAAGTTGGATA  
Sc16\_Sb16 CTGGGATGGAACCTCCTTTTCAACTTCCTTGGTGACTAGCAATTGGATT  
Sbay\_c637 CTGGGACTGGAACCTCCTTTTCAACTTCCTTGGTGACTAGTAACCTGGATA

Scer\_chr16 GGGTAGGCCACGAACTCAGAATGTCTCTTGATAAATTCTTTATTCTCTT  
Sc16\_Sc16 GGGTAGCAACGAATTCAGAATGTCTCTTGATGACTTCTTTAATTCTCTT  
Sc16\_Sb16 GGGTAGCAACAAATTCAGAATGTCTCTTGATGACTTCTTAATCTTCTT  
Sbay\_c637 GGGTAGCAACGAATTCAGAGTGTCTCTTGATGACTTCTTAATCTTCTT

Scer\_chr16 TTCTTCCAAGTACTCCAATTTGGTCATCTTCAAGAATAACTCAAGATGG  
Sc16\_Sc16 TTCTTCCAAGTACTCCAATTTGGTCATCTTCAAGAATAACTCAAGACGG  
Sc16\_Sb16 TTCTTCCAAGTACTCCAATTTGGTCGTCCTTCATGAATAACTCAAGACAG  
Sbay\_c637 TTCTTCCAAGTACTCCAATTTGGTCGTCCTTCATGAACAACCTCAAGACTG

Scer\_chr16 TACCCCTACCAATTCCTTTCATTAACTTCGTCAGAGTAACAGTGAAAGAA  
Sc16\_Sc16 TACCTCTACCAATTCCTTTCGTTAACTTCGTCCAAGTAACAGTGAAAGAA  
Sc16\_Sb16 TACCTCTACCGATCTTTCGTTAACTTCGTCAGAGTAACAGTGAAAGAA  
Sbay\_c637 TACCTCTACCGATCTTTCGTTAACTTCGTCATATGTAACAGTGAAAGAA

Scer\_chr16 CCACCAGCGTTGGATTCCCAAGATGATTGTTCTCGTCGTTGCTCTTTGA  
Sc16\_Sc16 CCACCAGCGATTAGATTCCCAAAATATATTGTTCTCGTCTCATGTTCTTTGGA  
Sc16\_Sb16 CCGCCTGCGTTGGACTCCCAAGATGATTGTTCTCGTCGTTGTTCTTTAGA  
Sbay\_c637 CCACCTGCGTTGGACTCCCAAGATGATTGTTCTCGTCTCATGTTCTTTAGA

Scer\_chr16 AATAACTGAACTCTGTCGGCAACTAAGAATAAAGAGTAAAACCAACAC  
Sc16\_Sc16 AATAACTGAACTCTGTCGGCGACTAAGAATAAAGAGTAAAACCAACAC  
Sc16\_Sb16 GATAACTTGGACCTATCAGCGACCAAGAATAAAGAGTAGAAACCAACAC  
Sbay\_c637 GATAACTTGGACTCTATCAGCGACTAAGAATAAAGAGTAGAAACCAACAC

Scer\_chr16 CGAATTGACCAATCATGGATACATCGGCACCAGCAGATAGAGCTTCCATG  
Sc16\_Sc16 CGAATTGACCAATCATGGATACATCGGCACCAGCAGATAGAGCTTCCATG  
Sc16\_Sb16 CGAATTGGCCAATCATGGAGACATCGGCACCAGCAGAAAGAGCTTCCATA  
Sbay\_c637 CGAATTGACCGATCATGGAGACATCGGCACCAGCAGAAAGAGCTTCCATG

Scer\_chr16 AAGGCTTTGGTACCAGACTTGGCAATGGTACCCAAAGTTATTAAATCAATTC  
Sc16\_Sc16 AAAGCTTTAGTACCAGACTTAGCAATGGTACCCAAATTGTTAAATCAATTC  
Sc16\_Sb16 AAGGCTTTGGTACCAGACTTAGCGATGGTACCCAAAGTTGTTGATCAATTC  
Sbay\_c637 AAGGCTTTGGTACCAGACTTGGCGATGGTACCTAAGTTATTGATCAATTC

Scer\_chr16 AGCCTTGGTCATACCAATACCAGAATCTCTGATTTCCAAACCTTTTTGCTT  
Sc16\_Sc16 AGCCTTGGTCATACCAATACCAGAATCTCTGATTTCCAAACCTTTTTCTT  
Sc16\_Sb16 CGCCTTGGTCATACCAATACCAGAATCTCTGATTTCCAAGACTTTTTCTT  
Sbay\_c637 CGCCTTGGTCATACCAATACCGAATCTCTGATTTCCAAGACTTTTTCTT

Scer\_chr16 CTGGCTTTGGAGTGATTCTAATAAAGAGATCTGGTTCGTTTCCAATTGC  
Sc16\_Sc16 CTGGTTTGGGGTGATTCTAATGAACAATCTGGTTCAGTTTCCAATTGC  
Sc16\_Sb16 CCGGCTTTGGAGTGATTCTAATGAACAATCAGGTTCAAGTTCTAATTCC  
Sbay\_c637 CTGGCTTTGGAGTGATTCTAATGAATAATCAGGTTCAAGTTTCAAGTTGC

Scer\_chr16 TTTGGATCAGACAAAGATTGTATCTAATTTATCCAAACGCATCCGAGGC  
Sc16\_Sc16 TTTGGATCAGACAAAGCTTGGTATCTAATTTGTCTAAAGCATCCGAGGC  
Sc16\_Sb16 TTTGGTCCGACAAAGCTTATATCTGATCTTGTCCAAACGCATCCGAGGC  
Sbay\_c637 TTTGGTCCGACAAAGCTTGTACTGATCTTGTCTAACGCATCTGAGGC

Scer\_chr16 ATTAGATATCAGTTCTCTCAAGAAAATTCCTTGTTAGAATAGACGGTGT  
Sc16\_Sc16 GTTAGATATCAGTTCTCTCAAGAAAATTCCTTGTTAGAATAGACAGTGT  
Sc16\_Sb16 GTTAGATATCAGTTCTCTCAAGAAAATTCCTTGTTAGAATAGACAGTGT  
Sbay\_c637 GTTAGATATCAGTTCTCTCAAGAAAATTCCTTGTTAGAATAGACAGTGT

Scer\_chr16 TGATGATCAAACCTCATCAACTGAGTAATTCAGCTTGAAATTCAAAAGTT  
Sc16\_Sc16 TGATGATCAAACCTCATCAACTGAGTGATTCAGCTTGAAATTCAAAAGTT  
Sc16\_Sb16 TGATGATCAAACCTCATCAACTGAGTGATTCCTGCTTGAAATTCAAAAGTT  
Sbay\_c637 TGATGATCAAACCTCATCAACTGAGTGATTCCTGCTTGAAATTCAAAAGTT

Scer\_YPL240C ←  
Spas\_ScYPL240C ←  
Spas-ScYPL240C/SbYPL240C ←  
Scer\_chr16 TCACTAGCCATATCTTTGCGTGTGTTGTTGTTGCTTTTGTGTT-----  
Sc16\_Sc16 TCACTAGCCATATCTTTGCGTGTGTTGTTGTTGCTTTTGTGTTGTTGCTTTTGT  
Sc16\_Sb16 TCACCAGCCATATTTGT-----TTTATTCCGCTTCTTGTGTT-----  
Sbay\_c637 TCACCAGCCATATTTGT-----TTTGTTCTGTTCTGTTGTT-----

Scer\_chr16 ---ATAGGACTCTATTTTCTATCAGGTATGATTTCTTGAAC--TC---TA  
Sc16\_Sc16 TTTATAGGACTCTATTTTCTATCAGGTATGATTTCTTGAAC--TC---TA  
Sc16\_Sb16 ---GATGTGCTCTATCTTCTATCAGACCTAGCGTATTCAACCTTCCAAA  
Sbay\_c637 ---ATAATTCTCTATCTTCTATCAGACCTAGTGTATTAAAGCCATC-AGAA

Scer\_chr16 ATACAGCGGAAGAAATGAGGAGGTCACAGATGTTAAGAATGAAGGGAT  
Sc16\_Sc16 ATACAGCGGAAGAAATGAGGAGGTCACAGATGTTAAGAATGAAGGGAT  
Sc16\_Sb16 GTAAACGTGAAGAAAGCA--CTGCAACAGACC--ACGAATCGAAGGGAC  
Sbay\_c637 GTAAAGGTGAAGAAAGCA--ACCAACAGACC--ACAATCGAAGGGAT

Scer\_chr16 AAGCTGCATATTTATATGTTTGGGGGT-GGCGGAAGGACCTGGTTGGT  
Sc16\_Sc16 AAGCTGCATATTTATATGTTTGGGGGT-GGCGGAAGGACCTGGTTGGT  
Sc16\_Sb16 AAACAGCTATTTATATAATTTGGGGGCGGCGGAAGGGCATGCTTTGT  
Sbay\_c637 AAACAGCTATTTATATAATTTGGGGGCGGCGGAAGGGCCTCTCTTGT



Scer\_chr16 ATTAAGATGAGAATTAACCGCTCATAAAACCATGCGCGTGTFFF-TC TTC  
Sc16\_Sc16 ATTAAGATGAGAATTAACCGCTCATAAAACCATGCGCGTGTFFF-TC TTC  
Sc16\_Sb16 ATAAAGATGAGGATTAACCGCTCATAGAAATTATGCGCGTGTFFFCTTTTC  
Sbay\_c637 ATAAAGATGAGGATTAACCGCTCATAGAAATTATGCGCGTGTFFFCTTTTC

Scer\_chr16 CACGGCGTTCTAGAAAAAAGAAAAATTCAAAA--GTTCTGCGAACT  
Sc16\_Sc16 CACGGCGTTCTAGAAAAAAGAAAAATTCAAAA--GTTCTGCGAACT  
Sc16\_Sb16 CACGACGTTCTAGAAAAAAGAAAAACCAAAAATTGTCGAAAGCT  
Sbay\_c637 CACGACGTTCTAGAAAAAAGAAAAACCAAAAATTCTGCAAGGCT

Scer\_chr16 CGAAA-GAACCGAATGTTTCGAACAATATGTGACAAGCGTATGAGTTAA  
Sc16\_Sc16 CGAAA-GAACCGAATGTTTCGAACAATATGTGACAAGCGTATGAGTTAA  
Sc16\_Sb16 CGAAA-GACATAGAACTTCTTGAGTGATGTATGGCCGCTTACGGCCTT  
Sbay\_c637 CAAAAGACTCAGACCCTGCTTGAGTGATGTATGGTTGCCATTACGGCAGC

Scer\_chr16 TAATCCGATTA-AGCTTTATTCTGTTCTTTTTACGTGTATGTAAAAC  
Sc16\_Sc16 TAATCCGATTA-AGCTTTATTCTGTTCTTTTTACGTGTATGTAAAAC  
Sc16\_Sb16 TTATGAGTGATAGACTCAAAAGATGCAATTTACTTATCCGTGCTTCG  
Sbay\_c637 TAATGAGTGATGGCTCTCAGATATTCATTTCTACTATCTGTGCTTCG

Scer\_chr16 GTTTTATGGATTACTGTGTTGAGAGAGGGGGGTGACACCCTCCGGAATG  
Sc16\_Sc16 GTTTTATGGATTACTGTGTTGAGAGAGGGGGGTGACACCCTCCGGAATG  
Sc16\_Sb16 AGAGGCGGG--TCATGCACTCGGTAGATTGAAG-AGCACC-GATAAAGC  
Sbay\_c637 AGGGGCGGG--TTCGCATCGGTATTGTTGAAGGAGCACC-GCTAAGC

Scer\_chr16 TGATATATCACACGCTTGACGTTGGTTCATAT--CGTAACCAAGAGAA  
Sc16\_Sc16 TGATATATCACACGCTTGACGTTGGTTCATAT--CGTAACCAAGAGAA  
Sc16\_Sb16 TAATTTTTGAAACGCCACGGTACGGTCAAACACCGCTTCAATAGAA  
Sbay\_c637 GAATATCCTGCACGCACACGGTACGGTCAAATACCGCTTCAATAAAG

Scer\_chr16 TACAAATACGCAC--ACGCAAGCTAAGTATATTTTAAAAATTTCTGTCA  
Sc16\_Sc16 TACAAATACGCAC--ACGCAAGCTAAGTATATTTTAAAAATTTCTGTCA  
Sc16\_Sb16 GACATTCAAAGAACGATGCACTTGAACCTACTACGATCTCGGCTTGC-TGC  
Sbay\_c637 GACATACAAACAGCAATGCACTTGCACACTACGATACTAGCTTGA-TGT

Scer\_chr16 TCAAGC----TTCAAATACTTCTAACCATCTCTTATTCTCCTCTTAGTA  
Sc16\_Sc16 TTAAGCCACCTTCCAAATACTTCTAACCATCTCTTATTCTCCTCTTAGTA  
Sc16\_Sb16 TCGAGCGT-TCAGCAAACAATCTTGACT--GCGCTTTATCCGGTG-GTA  
Sbay\_c637 TTGAGTATCTTAGCAA-CAATCTTGCC--CCGTTCTATCCGGCG-GTA

Scer\_chr16 GCCATTCTTTGCCACGAGGAATAAAAAGTCC-CGCGCCACTAATTACAGG  
Sc16\_Sc16 GCCATTCTTTGCCACGAGGAATAAAAAGTCC-CGCGCCACTAATTACAGG  
Sc16\_Sb16 GTC-TCC-CTGCCATGGGGTTAAACAATCC--CGCGTCACTAATTGTAGG  
Sbay\_c637 GTC-TCTCTGCCATGGGGCTTACAGTCCCGCGTCACTAATTGACAGG

Scer\_chr16 AAAAGAAAATAGGACAATCCATTGATGTCACCGTGTAATATCACCA  
Sc16\_Sc16 AAAAGAAAATAGGACAATCCATTGATGTCACCGTAGTAATATCACCA  
Sc16\_Sb16 GAGGAAGAA----TCAATT--ATTTGCTGTCA-----TCACTG  
Sbay\_c637 GAGGAAGAA----ACAATT--ATTTGCTGTCA-----TCACTA

Scer\_chr16 TGAACGATGATATGAAATTTTCATAGAAATAAGAAGGAAAAGTAATAAAG  
Sc16\_Sc16 TGAACGATGATATGAAATTTTCATAGAAATAAGAAGGAAAAGTAATAAAG  
Sc16\_Sb16 GATACGGAAGTCTGAAATTTTCATAGCAAGT-----GAAAAG-----  
Sbay\_c637 GACACGGAGGCTGAAATTTTCATAGAAAT-----GAAAAG-----

Scer\_chr16 AAAAGAGAACTGAGAAAAAATCGATGAGTTAATTATCATTTGTGTAAA  
Sc16\_Sc16 AAAAGAGAACTGAGAAAAAATCGATGAGTTAATTATCATTTGTGTAAA  
Sc16\_Sb16 AAAGAGAGGAATTAG---AAAATCGATGAGTTAATCAACCACTGTGTAGAA  
Sbay\_c637 AAAGAGAGGAATGGG---AAAATCGATGAGTTAATCAACCACTGTGTAGGA

Scer\_chr16 ACAAACCGAATTGTAATACGATAGGCAAAATTGTTCCGCTCTATCTCA  
Sc16\_Sc16 ACAAACCGAATTGTAATAGATAGGCAAAATTGTTCCGCTCTATCTCA  
Sc16\_Sb16 T--AATAGTAGCTTTATCTGGTAAATCAATTATCCT-GCTCGTTC--A  
Sbay\_c637 T--ACTAGTAGCTTCTATCTGGTAGACAAATTATCCT-GCTCGTTC--G

Scer\_chr16 AAGAAAGTAATTATTTCCAAATAGAAAAA---TCTACATATACGC  
 Sc16\_Sc16 AAGAAAGTAATTATTTCCAAATAGAAAAA---TCTACATATACGC  
 Sc16\_Sb16 AGGGAAGTAAT-----AACAGAAATCAACAT---CACATCCACACGC  
 Sbay\_c637 AGGAAAGTAGT-----AACAGCAAACAAAT---TATATCCACACGC

Scer\_chr16 AGATATGGGCCTACACAGTGAACCGTTAGATCAAGAGGACCAAGACACCA  
 Sc16\_Sc16 AGATATGGGCCTACACAGTGAACCGTTAGATCAAGAGGACCAAGACACCA  
 Sc16\_Sb16 AGACATGGGCCTACACACTGAACCTTTGGAACAAGAAGACCAAGACGCGA  
 Sbay\_c637 AGACATGGGCCTACACACTGAACCTTTGGAACAAGAAGACCAAGACGCGA

Scer\_YPL239W →  
 Spas\_ScYPL239W →  
 Spas\_SbYPL239W →  
 Sbay\_YPL239W →

Scer\_chr16 TAATACTCGATGCAAGAGCTGGCGATTGGATTCTCTGAAAGATATATTT  
 Sc16\_Sc16 TAATACTCGATGCAAGAGCTGGCGATTGGATTCTCTGAAAGATATATTT  
 Sc16\_Sb16 TAATACTCGACGCCAGAGCTGGCGACCTGGATTCTGCTTAAAGATATATTT  
 Sbay\_c637 TAATACTCGACGCCAGAGCTGGCGACCTGGATTCTGCTTAAAGATATATTT

Scer\_chr16 ACAACTTTAGTCAGTCCGAGTTACTTTTCGACTTGTAAGGAAAGTGAATC  
 Sc16\_Sc16 ACAACTTTAGTCAGTCCGAGTTACTTTTCGACTTGTAAGGAAAGTGAATC  
 Sc16\_Sb16 AGCACTTTGATCAGCCCAAGTTGTTGGTCTCGTGCAAGAAAGCGGGTC  
 Sbay\_c637 AGCACTTTGATCAGCCCAAGTTGTTGGTCTCATGCAAGAAAGTGGGTC

Scer\_chr16 TGATTCTACGGCTTTACATATGGCTGCTGCCAACGGTCATATAGAGACCG  
 Sc16\_Sc16 TGATTCTACGGCTTTACATATGGCTGCTGCCAACGGTCATATAGAGACCG  
 Sc16\_Sb16 CAACTCTACAGCTTTGCACATGGCTGCAGCAAACGGCCATGTTGAGACAG  
 Sbay\_c637 CAACTCTACAGCTTTGCACATGGCCGCAGCAAATGGTCATGTCGAGACAG

Scer\_chr16 TTCGGTATATACTGGAGACGGTTTCTCGCGCAAATAGTGC GAAGACTTG  
 Sc16\_Sc16 TTCGGTATATACTGGAGACGGTTTCTCGCGCAAATAGTGC GAAGACTTG  
 Sc16\_Sb16 TCCAGTACATACTTGAGACGGTTTCTCGCGAAGAACAGTGC TGAAGAGTTG  
 Sbay\_c637 TCCAGTACATACTTGAGACGGTTTCTCGCGAAGAACAGCGCTGAAGAGTTG

Scer\_chr16 AAAGCTTTTGTTAATGAGGTGAACAAAACAGGCAACACGGCTTTACATTG  
 Sc16\_Sc16 AAAGCTTTTGTTAATGAGGTGAACAAAACAGGCAACACGGCTTTACATTG  
 Sc16\_Sb16 AAAGCCTTCATCAATGAGGTAAACGAAACAGGCAACACCGCACTTCATTG  
 Sbay\_c637 AAAGCCTTCATCAATGAGGTGAACGAAACAGGCAACACCGCGCTTCATTG

Scer\_chr16 GGCGTCGTTGAAATGGCAAATAGACGTGGTCAAGCTACTGTGTGATGAAT  
 Sc16\_Sc16 GGCGTCGTTGAAATGGCAAATAGACGTGGTCAAGCTACTGTGTGATGAGT  
 Sc16\_Sb16 GGCCTCGTTGAAACGGCAAACCTGGACGTGGTCAAGCTACTGTGTGACGAAT  
 Sbay\_c637 GGCCTCGTTGAAACGGCAAACCTGGACGTGGTCAAGCTACTGTGTGACCAAT

Scer\_chr16 ATGAGGCAGACCCCTTTATAGAAACAAATTCGGCCACGATGCTATCTTT  
 Sc16\_Sc16 ATGAGGCAGACCCCTTTATAGAAACAAATTCGGCCACGATGCTATCTTT  
 Sc16\_Sb16 ATGAGGCCGACCCCTTCATCAGAAATAAGTTTGGCCACGATGCCATCTTT  
 Sbay\_c637 ACGAGGCTGACCCCTTCATAGAAACAAATTCGGCCACGATGCCATCTTT

Scer\_chr16 GAGGCCGAGAACAGCGGGAAGGAAGAAGTGAAACATACTTTTGAAGAA  
 Sc16\_Sc16 GAGGCCGAGAACAGCGGGAAGGAAGAAGTGAAACATACTTTTGAAGAA  
 Sc16\_Sb16 GAAGCCGAGAACAGCGGGAAGGAAGACTAGAGACGTACTTCTTGAAGAA  
 Sbay\_c637 GAAGCCGAGAACAGCGGGAAGGAAGAAGTAGAGACGTACTTCTTGAAGAA

Scer\_YPL239W →  
 Spas\_ScYPL239W →  
 Scer\_chr16 GTATGATGTCGAACCTGA.....  
 Sc16\_Sc16 GTATGATGTCGAACCTGA.....  
 Sc16\_Sb16 ATACGATGTTGAGCCCGA.....  
 Sbay\_c637 ATACGACGTGAGCCCGA.....  
 Spas\_SbYPL239W →  
 Sbay\_YPL239W →

1-11) ScXVI / SbXVI

Scer\_YPR160W →  
 Spas\_ScYPR160W/SbYPR160W →  
 Scer\_chr16 .....GGTGTGCTGCATCCTTACACGACATCTTAAGAAGATTCAAAAAAT  
 Sc16\_Sb16 .....GGTGTGCTGCATCCTTACACGACATCTTAAGAAGATTCAAAAAAT  
 Sb16\_Sb16 .....GGTGTGCTGCATCCTGACGATATCCTAAGAAGATTCAAAAAAT  
 Sbay\_c654 .....GGTGTGCTGCATCCTTGCACGATATCCTAAGAAGATTCAAAAAAT  
 Spas\_SbYPR160W →  
 Sbay\_YPR160W →

Scer\_chr16 CCAAGAGGCCATGGACTGAATTCCTGACCAAGTGGCTATTCAATTGAAT  
 Sc16\_Sb16 CCAAGAGGCCATGGACTGAATTCCTGACCAAGTGGCTATTCAATTGAAT  
 Sb16\_Sb16 CCAAGAGGTCATGGACCGAGTTCCTGACAAGTGGCTATTCAATTGAAC  
 Sbay\_c654 CTAAAGAGATCATGGACCGAGTTCCTGACCAAGTGGCTATTCAATTGAAT

Scer\_chr16 GATACTCATCCAACCTTAGCCATCGTTGAATTACAGAGAGTCTTGGTTCGA  
 Sc16\_Sb16 GATACTCATCCAACCTTAGCCATCGTTGAATTACAGAGAGTCTTGGTTCGA  
 Sb16\_Sb16 GATACTCATCCAACCTTAGCTATCCTTGAATTGCAAGAGTCTTGGTTCGA  
 Sbay\_c654 GATACCATCCAACGTTAGCTATCGTTGAATTGCAAGAGTCTTGGTTCGA

Scer\_chr16 TCTAGAAAACTAGATTGGCACGAGCTTGGGACATCGTGACCAAGACTT  
 Sc16\_Sb16 TCTAGAAAACTAGATTGGCACGAGCTTGGGACATCGTGACCAAGACTT  
 Sb16\_Sb16 TTTGAAAAATTTGACTGGCACGAGCTTGGGACATCGTGACCAAGACTT  
 Sbay\_c654 TTTGGAGAAATTAGATTGGCACGAGCTTGGGACATCGTGACCAAGACTT

Scer\_chr16 TTGCTTATACTAACCACACTGTTATGCAAGAGGCCCTGGAAAAATGGCCC  
 Sc16\_Sb16 TTGCTTATACTAACCACACTGTTATGCAAGAGGCCCTGGAAAAATGGCCC  
 Sb16\_Sb16 TTGCTTATACTAACCACACTGTTATGCAAGAGGCCCTGGAAAAATGGCCC  
 Sbay\_c654 TTGCTTACACCACCACACTGTTATGCAAGAGGCCCTGGAAAAATGGCCC

Scer\_chr16 GTCGGCCTCTTTGGCCATTGCTACCCAGACATTTGGAAATTATATATGA  
 Sc16\_Sb16 GTCGGCCTCTTTGGCCATTGCTACCCAGACATTTGGAAATTATATATGA  
 Sb16\_Sb16 GTTGGCTTGTTCGGCCATTGTTGCCAGACATCTGGAAATCATTTACGA  
 Sbay\_c654 GTTGGCTTATTCTGGCCATTGTTGCCAGACATCTGGAAATTATCTACGA

Scer\_chr16 TATCAACTGGTCTCTTTCGCAAGATGTGGCCAAAATAATCCCCAAGGATG  
 Sc16\_Sb16 TATCAACTGGTCTCTTTCGCAAGATGTGGCCAAAATAATCCCCAAGGATG  
 Sb16\_Sb16 TATTAATTGGTCTCTTTCGCAAGATGTGCAAGAAATAATCCCCAAGGATG  
 Sbay\_c654 TATTAATTGGTCTCTTTCACAGGATGTGCAAGAAATAATCCCCAAGGATG

Sc16 > Sb16  
 Scer\_chr16 TTGATCTTTTGTCTCGTATATCCATCATCGAAGAAAACCTCCAGAAAGA  
 Sc16\_Sb16 TTGATCTTTTGTCTCGTATATCCATCATCGAAGAAAACCTCCAGAAAGA  
 Sb16\_Sb16 TTGATCTTTTGTCTCGTATATCTATCATCGAAGAAAACCTCCAGAAAGA  
 Sbay\_c654 TTGATCTTTTGTCTCGTATATCCATCATCGAAGAAAACCTCCAGAAAGA

Scer\_chr16 CAGATCAGAATGGCCTTTTGGCTATTGTTGGTTCACACAAGGTTAATGG  
 Sc16\_Sb16 CAGATCAGAATGGCCTTTTGGCTATTGTTGGTTCATATAAGTCAACGG  
 Sb16\_Sb16 CAGATCAGAATGGCCTTTTGGCTATTGTTGGTTCATATAAGTCAACGG  
 Sbay\_c654 CAGATCAGAATGGCCTTTTGGCCATTGTTGGTTCATAAAGTCAACGG

Scer\_chr16 TGTGCTGAATTGCACTCTGAATTAATCAAACGACCATATTTAAAGATT  
 Sc16\_Sb16 TGTGCGGAATTGCACTCTGAATTAATTAAGACCACCATCTTCAAAGATT  
 Sb16\_Sb16 TGTGCGGAATTGCACTCTGAATTAATTAAGACCACCATCTTCAAAGATT  
 Sbay\_c654 TGTGCTGAATTGCACTCTGAATTAATTAAGACCACCATTTCAAAGATT

Scer\_chr16 TTGTCAAAGTTCATGGTCCATCAAAGTTGTCAATGTCACTAACGGTATC  
 Sc16\_Sb16 TCGTCAAATTCTACGGTGCATCAAAGTTGTCAAAGTTCACTAACGGTATC  
 Sb16\_Sb16 TCGTCAAATTCTACGGTGCATCAAAGTTGTCAAAGTTCACTAACGGTATC  
 Sbay\_c654 TCGTCAAATTCTACGGTGCATCAAAGTTCGTAAATGTCACTAACGGTATC

Scer\_chr16 ACACCAAGGAGATGGTTGAAGCAAGCTAACCCCTCAATTGGCTAAACTGAT  
 Sc16\_Sb16 ACACCAAGGAGATGGTTGAAGCAAGCTAACCCCTCAACTGGCTAGATTGAT  
 Sb16\_Sb16 ACACCAAGGAGATGGTTGAAGCAAGCTAACCCCTCAACTGGCTAGATTGAT  
 Sbay\_c654 ACACCAAGGAGATGGTTAAAGCAAGCTAACCCCTGCCTTGGCTAGATTGAT

Scer\_chr16 CAGTGA AACCTT AACGATCCAACAGAGGAGTATTTGTTGGACATGGCCA  
Sc16\_Sb16 TAGCAAAACTCTT AACGATCCTACAGAGGACTATCTACTAGACATGACAA  
Sb16\_Sb16 TAGCAAAACTCTT AACGATCCTACAGAGGACTATCTACTAGACATGACAA  
Sbay\_c654 TAGTGA AACCTCTT AACGATCCTACAGAGGAGTATCTACTAGATATGACAA

Scer\_chr16 AACTGACCCAGTTGGGAAAATATGTTGAAGATAAGGAGTTTTTGAAA  
Sc16\_Sb16 AGTTAACTCAACTGGCAAAGCACCTTGAGGATAAGAGTTTTTGAAAGAG  
Sb16\_Sb16 AGTTAACTCAACTGGCAAAGCACCTTGAGGATAAGAGTTTTTGAAAGAG  
Sbay\_c654 AGTTAACTCAATTGGCAAAAACAATTGAGGATAAGAGTTTTTGAAAGAA

Scer\_chr16 TGGAACCAAGTCAAGCTTAATAATAAGATCAGATTAGTAGATTTAATCAA  
Sc16\_Sb16 TGGAAACAAGTCAAACCTCAATAATAAGATCAGATTGGTGGACCTAATCAA  
Sb16\_Sb16 TGGAAACAAGTCAAACCTCAATAATAAGATCAGATTGGTGGACCTAATCAA  
Sbay\_c654 TGGAACCAAGTCAAGCTCAACAATAAGATCAGATTAGTGGATCTAATCAA

Scer\_chr16 AAAGGAAAATGATGGAGTAGACATCATTAACAGAGAGTATTTGGACGACA  
Sc16\_Sb16 AAAAGAAAATGGTGGTGAAGACATCATTAACAGAGAGTATCTAGACGATA  
Sb16\_Sb16 AAAAGAAAATGGTGGTGAAGACATCATTAACAGAGAGTATCTAGACGATA  
Sbay\_c654 AAAAGAAAATGACGGTGAAGACATCATTAACAGAAAGTATCTAGATGACA

Scer\_chr16 CCTTGTTTGATATGCAAGTTAAACGTATTTCATGAAATATAAGCGTCAACAG  
Sc16\_Sb16 CTTTGTTTGATATGCAAGTTAAACGTATTTCACGAGTATAAACGTCAACAA  
Sb16\_Sb16 CTTTGTTTGATATGCAAGTTAAACGTATTTCACGAGTATAAACGTCAACAA  
Sbay\_c654 CTTTGTTTGATATGCAAGTTAAACGTATTTCATGAGTATAAGCGTCAACAA

Scer\_chr16 CTAAACGTCTTTGGTATTATATACCGTTACCTGGCAATGAAGAATATGCT  
Sc16\_Sb16 CTAAACGTCTTTGGTATTATTTACCGTTACTTAGCAATGAAAAATATGCT  
Sb16\_Sb16 CTAAACGTCTTTGGTATTATTTACCGTTACTTAGCAATGAAAAATATGCT  
Sbay\_c654 CTAAACGTCTTTGGTATTATTTACCGTTACTTGGCAATGAAAAATATGCT

Scer\_chr16 GAGAACGGTGCTTCATCGAAGAAGTTGCCAAGAAATATCCACGTAAGG  
Sc16\_Sb16 AGAGAACGGTGCTTCATCGAAGAAGTTGCCAAGAAATATCCACGTAAGG  
Sb16\_Sb16 AGAGAACGGTGCTTCATCGAAGAAGTTGCCAAGAAATATCCACGTAAGG  
Sbay\_c654 AGAGAACGGTGCTTCATCGAAGAAGTTGCCAAGAAATATCCACGTAAGG

Scer\_chr16 TTTCAATCTTTGGTGGTAAGAGTGCTCCTGGTTACTACATGGCTAAGCTG  
Sc16\_Sb16 TTTCTATCTTCGGTGGTAAGAGTGCAACCGTTACTACATGGCTAAGTTG  
Sb16\_Sb16 TTTCTATCTTCGGTGGTAAGAGTGCAACCGTTACTACATGGCTAAGTTG  
Sbay\_c654 TTTCTATCTTCGGTGGTAAGAGTGCAACCGTTACTACATGGCTAAGTTG

Scer\_chr16 ATCATAAAATGATCAACTGTGTGCTGACATTGTAAATAACGACGAGTC  
Sc16\_Sb16 ATCATCAAACTGGTCAACTCTGTGCTGAAATTGTAAATAACGACGAAATC  
Sb16\_Sb16 ATCATCAAACTGGTCAACTCTGTGCTGAAATTGTAAATAACGACGAAATC  
Sbay\_c654 ATCATCAAAATGGTCAACTCTGTGCAAGAATTGTAAATAACGACGAAATC

Scer\_chr16 AATTGAGCATTGTTGAAGTTGTCTTTGTTGCTGATTATAATGTTCTTA  
Sc16\_Sb16 AATCGACGACTTATTGAAAGTTGTCTTCATTGCTGATTATAATGTAATCCA  
Sb16\_Sb16 AATCGACGACTTATTGAAAGTTGTCTTCATTGCTGATTATAATGTAATCCA  
Sbay\_c654 AATTGATGATTTATTAAAAGTCGTAATTATTGCTGATTATAATGTTCTTA

Scer\_chr16 AGGCTGAAATCATTATTCAGCAAGTGACTTGAGTGAGCATATTTCTACT  
Sc16\_Sb16 AGGCCGAAATTATTATTCAGCAAGTGATTTAAGTGAAACATATTTCAACT  
Sb16\_Sb16 AGGCCGAAATTATTATTCAGCAAGTGATTTAAGTGAAACATATTTCAACT  
Sbay\_c654 AGGCTGAGATTATTATTCAGCAAGTGATTTGAGTGAAACATATTTCAACT

Scer\_chr16 GCTGGTACTGAAGCGTCTGGTACTTCTAATATGAAGTTTGTATGAACGG  
Sc16\_Sb16 GCTGGTACAGAAGCGTCAAGTACTTCTAATATGAAGTTTGTATGAATGG  
Sb16\_Sb16 GCTGGTACAGAAGCGTCAAGTACTTCTAATATGAAGTTTGTATGAATGG  
Sbay\_c654 GCTGGTACAGAAGCGTCAAGTACTTCTAATATGAAGTTTGTATGAATGG

Scer\_YPR160W →  
Spas\_ScYPR160W/SbYPR160W →  
Scer\_chr16 TGGTTTGATTAT .....  
Sc16\_Sb16 TGGTTTGATTAT .....  
Sb16\_Sb16 TGGTTTGATTAT .....  
Sbay\_c654 TGGTTTGATTAT .....  
Spas\_SbYPR160W →  
Sbay\_YPR160W →

1-12) ScXVI / SbXVI

← Scer\_YPR190C  
 Scer\_chr16 .....TGGCATTAGTTTGTCTATATGGAACATAGTAAACACCTGGTTTTGGT  
 Sb16\_Sc16 .....TGGCATTAAATTTACTATACGGAACGTGATAAACACCTGGTTTTGT  
 Sbay\_c654 .....TGGCATTAGTTTACTATACGGAACATAATAAACACCTGGTTTTGT  
 ← Spas\_SbYPR190C  
 ← Sbay\_YPR190C

Scer\_chr16 TTCGTTCAAAAAGGGGAAATTTGATGATGCTAGGATTTTTAAATGACTAT  
 Sb16\_Sc16 TTCGTTTAGGAATGGAAAATTTGATGATGCTAAGATTTTTCAAATGGCTAT  
 Sbay\_c654 TTCGTTTAGAAAATGGAAAACCTTGACGATGCTAAGATTTTTAAATGGCTAT

Scer\_chr16 TTATCAAAGAAGCTGAGTGAGGATCCTCAGTGTCTGCATCCAAATCCTCC  
 Sb16\_Sc16 TTATTAAAGAAGCTGAGTGTGGATTTTCCATATCTGCATCCAAATTCATCG  
 Sbay\_c654 TTATCAACGAAGCTGAGTGTGGATTTTCCATATCTGCGTCCAATTCATCG

Scer\_chr16 TCTCTTCGTCTTCTTCTTGT-----GTA-----TCTTCACTTCTTGT  
 Sb16\_Sc16 TCGTCTCGGCTTCTTGTCTCTCTTGTCTCTCTTCTTCACTATCTTGT  
 Sbay\_c654 TCGTCAACGGCTTCTTGTCTCT-----TCTTCACTCTCTGT

Scer\_chr16 AAGAGATTGGAAACAGCAGCAGGTAGCGCGGGATCAAAATCCATCTT  
 Sb16\_Sc16 AACAGATTGAGTATGCCAGCAGGTAGCGCAGGAATGGCAAATCCATCTT  
 Sbay\_c654 AACAGATTGAGTATCCTGCAGGTAATGCAGGAATGGCAAATCCATCTT

Scer\_chr16 CGTTTTTAATTTTTTACTGGGTAATGATGCAGCAGCGTTTGAGCCAGAA  
 Sb16\_Sc16 CAGTTTTCAGTTTCTTATTTGCTGGTGGTGGAGCGGAGTTTCAACCGGAA  
 Sbay\_c654 CAGTTTTCAGCTTCTTATTTGCCGGTATGAAACAGAGTTTGAAGTGGAA

Scer\_chr16 CGCTTTTATTGTGAGAGGCTTTCAGATAATAAGCTTCCACGCAAGTC  
 Sb16\_Sc16 CGTTTCTTATTGTGAGAGGCTTCTTGGTTACTAAGCTGCCGCGCAGGTC  
 Sbay\_c654 CGTTTCTTATTGTGAGAGGCTTCTTAGTCACTAAGCTGCCACGCAAGTC

Scer\_chr16 CAATTCGCGGGGAGATGCTTGCCAAGTCAATAGCAATTAAGGTAAGCC  
 Sb16\_Sc16 CAATTCCTTAGGGATATGCTTAGCCAAGTCAATAGCGTTAAAGGTTAAAC  
 Sbay\_c654 CAATTCGTAGGGATATGTTTGGCCAAGTCAATAGCGTTGAAAGTTAAAC

Scer\_chr16 CTGGTGTCTTCTCCTCAACAAGTTCGGCTTCGTCTTGAAACGATTTTGCT  
 Sb16\_Sc16 CTGGCGTCTTTCCTCAATGAGCTCTAGTTCTTCTGAAACGATTTTGCC  
 Sbay\_c654 CTGGCGTCTTTCCTCAATAAGCTCTAGTTCTTCTGAAACGATTTTGCC

Scer\_chr16 TCCTCCAAATCTTGTAAGAAGCCAGTTTGAGTTAGTGGATCTCTAATTTT  
 Sb16\_Sc16 TCATCTAAATCCTGTAAAAGACCAGTTTGAGTTAATAGATCTATAATGCA  
 Sbay\_c654 TCTTCTAAATCCTGTAAAAGACCTGTTTGGTAAGGGATCTATAATGCA

Scer\_chr16 AGGAGACTTTTGCTCTGTGAGTCTTAATGCAATTTGTAACCTTGAGCTG  
 Sb16\_Sc16 GGGAGATTTTGCTCTGTGAGTCTTAATGCAATGCTGTAACCTTGAGCTG  
 Sbay\_c654 AGGAGATTTTGCTCTGTGAGTCTTAATGCAATCTGTAACCTTGAGCCG

Scer\_chr16 TGACGGAGCCGACTCTTGTCTTGGCCAAAGTTAATCAATTGTTTAGATCTT  
 Sb16\_Sc16 TAATGGATCCGACTCTCGTTTGGCCAAATTTGGTCAATTGTTTGGATCTT  
 Sbay\_c654 TAATGGATCCGACTCTCGTTTGGCCAAATTAGTCAATTGTTTGGATCTT

Scer\_chr16 CTACCTTTCATAAATCTATCCAAATTAATCGTCAGAGAGACTGTAGGTTT  
 Sb16\_Sc16 CTGCCCTTCATAAACCTATCTAAATTAATAGTTAAGGAGACCGTAGACTT  
 Sbay\_c654 CTGCCCTTCATAAACCTATCTAAATTAATAGTTAAGGAGACCGTAGGCTT

Scer\_chr16 AACAACTCCTCAATGAGGCTTTTGGATCAACCGTTAAGATTTGTGAAAGCT  
 Sb16\_Sc16 AACGACCCTCAATGAAGTCTTGGTGTCAACGGTTAAGATTTGTGAAAGGT  
 Sbay\_c654 GACCATCCTTAATGAAGTCTTAGTGTCAACGGTTAAGATTTGTGAAAGGT

Scer\_chr16 CATTGGTTTATTTATGATTTTGGCAAAATCAGTTTTCGCATTCACTTGT  
 Sb16\_Sc16 CGTTTGGTTTACTCAAATTTTGGCAAAATCGGTCTTTCGATTCACTTCT  
 Sbay\_c654 CGTTTGGTTTACTCAAATTTTGGCAAAATCGGTCTTTCGATTCACTTCT

Scer\_chr16 GCTTGGATCTTTTCTTCAAATCGGACAAACGGGAGTTTTCTGGGAATATT  
Sb16\_Sc16 GCTTGGATCTTTTCTTCAAATCGGATAAGGGAGAGTTTTCTGGGGATTGT  
Sbay\_c654 GCTTGGACCTTTTCTTCAAATCTGATAATGGAGAGTTTTCTGGGAATTT

Scer\_chr16 TTTGTAATGTTTTTCATATAAAAATTGCCAGAGATCTTCGATTGGGGTAT  
Sb16\_Sc16 GTTATAATGCTTGTGCGAATAAGAATTGCCACAGGTCTTCAATCGGAGTAT  
Sbay\_c654 ATTATAATGCTTATCGAATAAGAATTGCCACAGGTCTTCGATCGGAGTAT

Scer\_chr16 AATGC AATTTTGATATTTGAATAAGATATCCCATTTACACAGTTGCACG  
Sb16\_Sc16 AATGTAATTTGATATTTGAATAAGATATCCCATTTACATAAATTGCACG  
Sbay\_c654 AATGTAATTTGATATTTGAATAAGATATCCCATTTACACA AATTGCACG

Scer\_chr16 AATAGTGATGAAATGGTGTACTTCATGGAATCTGACGTGACACTACTTAG  
Sb16\_Sc16 AAGAGTGACGAAATGGTGTACTTCATGGAATCTGATGTGACGCTACTTAA  
Sbay\_c654 AAGAGTGACGAAATGGTGTACTTCATGGAATCTGATGTGACGCTGCTCAG

Scer\_chr16 ATAATCTTCACCTGTTAAGGACCCCTAATGATATAACGTTTTGTACAATTT  
Sb16\_Sc16 ATAGTCCTCGACAGTCAGGGAGCCCAATGATATGACGTTTTGTACGATTT  
Sbay\_c654 GTAGTCCTCGACAGTTAGGGAACCTAAAGATATGACGTTTTGTACAATTT

Scer\_chr16 CAGCCACAGCTGTTTATGCTCCTCTTCGTCGTTTACACGCATTTGCGTA  
Sb16\_Sc16 GTGCCACTAATTGCTTATG-----TTCATCGTCAACACGCATTTGAGAT  
Sbay\_c654 GTGCCACTAATTGCTTATG-----TTCATCGTCAACACGCATCTGAGAT

Scer\_chr16 ATAATTTTCGTC AATAATCAACCCTGAGTAGAGTAAAATGTTATCCCTTC  
Sb16\_Sc16 GTAATTTTCGTC AATAATCAACCCTGAGTAAAGCAGTAGATGAATCCCTTC  
Sbay\_c654 GTAATTTTCGTC AATGATCAACCCTGAGTAAAGCAAGAGATGAATCCCTTC

Scer\_chr16 CTCGTTATAGTAATAATAAGTCGTTTTTTTCCCGGATATTGCTGTTTCTT  
Sb16\_Sc16 CTCGTTATAATAATAATAAGTGGTTTTTTTCCCGGAATCGCTGTTTCTT  
Sbay\_c654 CTCGTTATAGTAGTAATAAGTGGTTTTTTTCCCGGAATCGCTGTTTCTT

Scer\_chr16 GCAGGTACTTAACACACCTTAATTGAGTTAATGAGACTAGTGTGCTCTTG  
Sb16\_Sc16 GCAAAAACCTTAACACACCTCAATTGCGTCAATGACACTAACGTGGTCTTG  
Sbay\_c654 GCAAAAATTTAACACACCTCAATTGCGTCAATGACACTAACGTGGCCTTG

Scer\_chr16 ACGCTGCTTACATCCATACCATCTATTTCTCCACTAACTCGCGCACACT  
Sb16\_Sc16 ATGCTCTCCGTATGCATGCCATCTATCTTCTCCTCCAACCTCCGAACACT  
Sbay\_c654 ATACTCTCCGTATCCATGCCATCTATCTTCTCCACCAACTCCCGGACACT

Scer\_chr16 CAATCTGCCAGCGCAACCAACATCCCAATTACAGAAGCTGCTCTTTTCCAC  
Sb16\_Sc16 CAATCTGCCAGTGCAAGCCAGCATTCCGACCACAGAGGCCGCCCTCTCAC  
Sbay\_c654 CAATCTTCCAGTGCAAGCCAGCATTCTTACCACAGAGGCCGCCCTCTCAC

Scer\_chr16 CCAGATGTGCCTTACC AACTCTTTGTAAAGAAACAAATCGGGATTCAA  
Sb16\_Sc16 CCAGATGTGCCTTACC AATCTTATATAGAAACAAATCAGGATTCAA  
Sbay\_c654 CCAGATGTGCCTTACTAATCTCTTGTATAGAAACAAATCAGGATTCAA

Scer\_chr16 GTTCTCTGTTCCAAGGATGATATGGTCATAACATCTTCGGGGGTGACCAA  
Sb16\_Sc16 GTCCGCTGTTCCAAGGAGATATGGTCATAACGTCTTCGGGCGTGACCA  
Sbay\_c654 GTCCGCTGTTCCAACGAAGATATGGTCATAACGTCTTCGGGCGTGACCAT

Scer\_chr16 CTCTCTCAGATTTCGACAGTGCTCTCACCTGTTTGTTCTCTGCACTAAGCG  
Sb16\_Sc16 TCTCTCGACTCTGCCCCGCTTGACCTGCTTGATTTCGGCACTTACCA  
Sbay\_c654 TCTCTCGACTCTGTCCCGCTTGACCTGCTTGATTGTCGGCACTTACCA

Scer\_chr16 CTTCTCCAGTAACTCGTCCATTTGGATCTTGCTCAACAAAAATTTTCC  
Sb16\_Sc16 CATCTTCAGTAGCTCGTCCATCCTAATGTCGACCAATTCG--TGCTTCC  
Sbay\_c654 CATCTTCAGTAGCTCGTCCATCGTAATATTGCGCGATTTCG--TGCTTCC

Scer\_YPR190C ←  
Sbay\_YPR190C ←  
Spas\_SbYPR190C ←

Scer\_chr16 CTATTCCTGTGTCTAGCAATTCTCTATTGTTCTCAATATTCTTCCACTAT  
Sb16\_Sc16 GG--TCCTATACCA-CCGCCCTCTATTGTTCTCAATGCATCTTTCAT--T  
Sbay\_c654 GG--TCCTATACCA-CCGCCCTCTATTGTTCTCAATGCATATTTCAT--T

Scer\_chr16 TATTATTGATCCAAATTAATTT-T---TTTCTTCAATGCGATGAGCT  
Sb16\_Sc16 TATTATT--GATCCGATTTT---TAAATTTTCTCAATGCGATGAGCT  
Sbay\_c654 TATTATT--GATCCGAATTAATTTATTTTCTTCAATGCGATGAGCT

Scer\_chr16 TTTGAAAATTTCTGATCATTCCCACGAACCAATAGAAGGCCCGCCCCG  
Sb16\_Sc16 CTTGAAAATTTCTAGATCGCTTAAGACGAACCAATAGAAGGTCCGCCCCG  
Sbay\_c654 CTTGAAAATTTCAATCGCTTGGACGAACCAATAGAAGGTCCGCCCCG

Scer\_chr16 TCTTATATCCGTTAGCCTACCAAAATATATATAAAGAACAAGGGCCTTT  
Sb16\_Sc16 TCTTATATCCGTTAGCGTATCGAATATATATAAAGAACAAGGGCCTTT  
Sbay\_c654 TCTTATATCCGTTAGCGTATCGAATATATAT--AAAGAACAAGGGCCTTT

Scer\_chr16 CCTCAGAGCGTTTGTGACGAAGTTTGTAGAAAGTTAATAAGGTTTTTAACA  
Sb16\_Sc16 CTTCAGAGAGTTTGTGTTGAAGTTCTTGAATTGTTAGGTTTTGAACA  
Sbay\_c654 CTTCAGAGCGTTTGTGATGAAGTTCTTGAAGTTAGTTAGGTTTTGAACA

Scer\_chr16 GCAGTGTGCTCGAACGATTAGGACGGGAGAGTTAAAAATTATATAAAGGAA  
Sb16\_Sc16 GGAGTGTGCTCGAACGATTAGGACGGGAGACTTAAAACTATAAAGGAA  
Sbay\_c654 GGAGTGTGCTCGAACGATTAGGACGGGAGAGTTAAAACTATAAAGGAA

Scer\_chr16 AAAAGAAGAACTGTTGATGTTGTCTGACGAGCTAGATTGCAATTTGCCAGGG  
Sb16\_Sc16 AATAGAAAAATTTGATGTTGTCTGACGAGCTAGATTGCAATTTGCCAGGG  
Sbay\_c654 AAGAGAAAAATCTGATGTTGTCTGACGAGCTAGATTGCAATTTGCCAGGG

→ Scer\_YPR191W  
→ Spas\_SbYPR191W/ScYPR191W  
→ Sbay\_YPR191W

Scer\_chr16 GTCAGTTAGAAGTTGACCGTTTCCGCTAGAGACGCACCTACTAAAATAT  
Sb16\_Sc16 GTCAGTTAGAAGATTGACTGTGTCTAGCCAGAGACGCTCCAGTAAAGTGT  
Sbay\_c654 GTCAGTTAGAAGATTGACTGTGTCTAGCCAGAGACGCTCCAGTAAAGTGT

Scer\_chr16 CTACATTGGCTGTTAAGGTCCATGGAGGGTCTCGTTATGCAACCAAGGAT  
Sb16\_Sc16 CTACTTTGGCTGTCAAGGTCCATGGTGGATCCGTTATGCAACCAAGGAC  
Sbay\_c654 CCACTTTGGCTGTCAAGGTCCATGGTGGTCTCGTTATGCAACCAAGGAC

Scer\_chr16 GGTGTGCCCATCTTTTAAACAGATTCAACTTTCAAACACGAACTAG  
Sb16\_Sc16 GGTGTAGCCCATCTTTTGAACAGTTCAACTTCCAGAACACAAATGCTAG  
Sbay\_c654 GGTGTAGCTCATCTCTTGAACAGTTCAACTTCAAACACAAATGCCAG

Scer\_chr16 ATCAGCTTTGAAATTAGTCAGAGAATCCGAATTATTAGGGGGAACTTTTA  
Sb16\_Sc16 GTCTGCTTTGAGATTGGTCAGAGAATCCGAATTATTAGGGGGAACTTTTA  
Sbay\_c654 GTCTGCTTTGAGATTGGTCAGAGAATCCGAATTATTAGGGGGAACTTTTA

Scer\_chr16 AGTCTACCTTGGATAGGAATACATCACTTTGAAAGCTACCTTTTGAAG  
Sb16\_Sc16 AGTCCACTTTGGATAGGAATACATCACTCTAAAAGCTACATTCTTGAGG  
Sbay\_c654 AGTCCACTTTGGACAGGAATATATCACTCTAAAAGCCACTTCTTGAGG

Scer\_chr16 GACGACCTTCCCTACTACGTCAATGCCCTAGCAGACGTGCTATACAAGAC  
Sb16\_Sc16 GACGACCTTCCCTACTACGTCAATGCCCTGGCAGATGTGTGTATAAGAC  
Sbay\_c654 GATGACCTTCCCTACTACGTCAATGCCCTGGCAGATGTGTGTATAAGAC

Scer\_chr16 TGCCTTCAAACCTCACGAGCTCACCGAATCTGTTTTGCCTGCTGCTAGAT  
Sb16\_Sc16 TGCCTTCAAACCCACGAGCTGTCTGAATCTGTTTTGCCTGCTGCTAGAT  
Sbay\_c654 TGCCTTCAAGCCACGAGCTACCTGAATCTGTTTTGCCTGCTGCTAGAT

Scer\_chr16 ACGATTATGCGGTGCTGAAACAATGTCCGGTAAAGAGCGCCGAAGACCAA  
Sb16\_Sc16 ACGATTATGCGGTTGCTGAGCAGTGCCCGTAAAAAGCCGAGAAGAACAG  
Sbay\_c654 ACGATTATGCTGTTGCTGAGCAGTGCCCGAAAAAATGCAGAGGAACAG

Scer\_chr16 **TTGTATGCCATTACATT**CAGAAAGGGTT**AGGAAACCCATTGTTATACGA**  
Sb16\_Sc16 **TTATTCGCTATTACATT**TAGAAAGGGCT**TGGAAATCCATTGTATTACGA**  
Sbay\_c654 **TTGTTCGCTATTACATT**CAGAAAGGGCT**TGGAAACCCATTGCTCTACGA**

Scer\_chr16 **TGGTGTGAAAAG**AGTCAGTT**TGCAAGATATCAAGGAC**TT**TGCGGACAAAG**  
Sb16\_Sc16 **CGGTGTGAAAAG**AGTCAGTT**TGCAAGATATCAAGGATTACGCTGACAAAG**  
Sbay\_c654 **CGGC**GTGAAAAG**AGTCAGCT**TGCAAGATAT**CAAGGATTACGCTGACAAAG**

Scer\_chr16 **TCTATACCAAGGAGAA**CCTT**GAAAGTTAGCGGTGAAAATG**TGTT**GAGGCC**  
Sb16\_Sc16 **TCTACACTAAAGAGAAT**CTT**GAAATTACAGGTGAAAATAT**TGTT**GAGGCC**  
Sbay\_c654 **TCTACACTAAAGAGAAT**CTT**GAAATCACAGGTGAAAATAT**CTGTT**GAGGCC**

Scer\_chr16 **GATTTGAAAAGATT**TGTT**GACGAGTCAC**TGTT**AAGCACTTTG**CCT**GCAGG**  
Sb16\_Sc16 **GATTTGAAAAGATT**TGTT**GACGAGTCAC**TGTT**AAGCACTTTG**CCT**GCAGG**  
Sbay\_c654 **GATTTGAAAAGATT**CGTT**GACGATTC**CTT**GTTGGCACTTTAC**CC**ACAGG**  
Sb16 > Sc16

Scer\_chr16 **TAAGTCAT**TGGT**GAGTAAATCCGAACCAAAT**CTTT**TTGGGTGAAGAA**  
Sb16\_Sc16 **TAAGTCAT**TGGT**GAGTAAATCCGAACCAAAT**CTTT**TTGGGTGAAGAA**  
Sbay\_c654 **CAATCACT**GGT**AAGTAAATCCGAACCAAAT**CTTT**CTTAGGTGAAGAA**

Scer\_chr16 **ACAGGGTAAGGTTT**ATCGGT**GACTCCGTTGCCGCAT**TGGT**TATCCCGGTA**  
Sb16\_Sc16 **ACAGGGTAAGGTTT**ATCGGT**GACTCCGTTGCCGCAT**TGGT**TATCCCGGTA**  
Sbay\_c654 **ACAGACTAAGATT**CC**TCCGTGAT**TCCGT**TGCTGCCATCAGTATCCCTGTG**

Scer\_chr16 **AACAAAGCCT**CC**TAGCTCAATATGAAGT**ATTGG**CAACTATTTGACCTC**  
Sb16\_Sc16 **AACAAAGCCT**CC**TAGCTCAATATGAAGT**ATTGG**CAACTATTTGACCTC**  
Sbay\_c654 **AACAAAGCAT**CT**CTAGCCCAATACGAAGT**CTTGG**CAACTATTTGACCTC**

Scer\_chr16 **TGCCCTATCCGAGCTT**TCCGG**TTTAATCAGCTCGGCTAACTTGATAAAT**  
Sb16\_Sc16 **TGCCCTATCCGAGCTT**TCCGG**TTAGTCAGCTCGGCTAACTTGATAAAT**  
Sbay\_c654 **CGCGCTTCCGATCT**C**TCCGGTTG**TCA**CACTGCCAACTACAAAAT**

Scer\_chr16 **TCAGTGACGGCGGCCT**ATT**TA**CT**CTGTTT**GTAAGAG**CCAGGACAGCGCC**  
Sb16\_Sc16 **TCAGTGACGGCGGCCT**GTT**TA**CT**CTGTTT**GTAAGAG**CCAGGACAGCGCC**  
Sbay\_c654 **TCAGTGACGGCGGTCT**CTT**CA**CT**TGACCGT**CAGAG**ATCAAGACAGCTCT**

Scer\_chr16 **GTGGTATCTTCCAACATCAAGAAAAT**TGTT**GCGGATT**TGAAGA**AGGGCAA**  
Sb16\_Sc16 **GTGGTATCTTCCAACATCAAGAAAAT**TGTT**GCGGATT**TGAAGA**AGGGCAA**  
Sbay\_c654 **GTGGTGTC**CG**CAACATCAAGAA**GATTGTT**GCAGACT**TGAAGA**AGGGTAA**

Scer\_chr16 **GGACTTATCCCTGCA**ATA**AAATTACACAAGTTAAAGAATGCGTCCAAA**  
Sb16\_Sc16 **GGACTTATCCCTGCA**ATA**AAATTACACAAGTTAAAGAATGCGTCCAAA**  
Sbay\_c654 **GGATTTATCA**CT**TGCGGTA**AA**ATTACACA**AA**ATTGAAGAATGCTGTACAAA**

Scer\_chr16 **ATGAATCTGTTTCCAGCCCAATTGAACTAAATTT**TGAC**CGCGTGAAGGAC**  
Sb16\_Sc16 **ATGAATCTGTTTCCAGCCCAATTGAACTAAATTT**TGAC**CGCGTGAAGGAC**  
Sbay\_c654 **ATGAACATGTTTTCA**CG**CA**GCC**GAA**TCG**AACTCGACGGCGTGAAGGAC**

Scer\_chr16 **TTTAAGTTGGGAAAAT**CA**ACTATGTAGCCGT**CGGT**GATGTTTCCA**ACTT  
Sb16\_Sc16 **TTTAAGTTGGGAAAAT**CA**ACTATGTAGCTGT**CGGT**GATGTTTCCA**ACTT  
Sbay\_c654 **TTCAAGCTAGGTAAGTT**TA**ACTACGTAGCTGT**TGGT**AATGTTTCCA**ACTT

Scer\_chr16 **GCCATATTTGACGAATTGTAA**GAGG**AAAGTATTTGTACAAAACGAAAA**  
Sb16\_Sc16 **GCCATATTTGACGAATTGTAA**GAGG**AAAGTATTTGTACAAAACGAAAA**  
Sbay\_c654 **GCCATATTTGATGAATTGTAA**----**AAAGTACGTGTGCA**CAA**----AAA**  
Spas\_SbYPR191W/ScYPR191W  
Sbay\_YPR191W

Scer\_chr16 **CTAAAGGCAAATATATATATAGATGT**TGCC**CGCACCTTTTTTTT**-**AATG**  
Sb16\_Sc16 **CTTCAGGCAAATATATATATAGATGT**TGCC**CGCACCTTTTTTTT****AATG**  
Sbay\_c654 **C--CAGGCA--GCAC**ATAGAA**--TGCCACCACGC**TTTT**TT--AATG**



Scer\_chr16 AATATTCACACA-----AATATGAAAATAAAACAAACA--  
Sb16\_Sc16 AATATTCACACA-----AATATGAAAATAAAACAAACA--  
Sbay\_c654 AATATTCACAAATGATACGTTGAGTAGTATCAAAAAAATAAAAAAAT

Scer\_chr16 ---AATCAAATAACAACATGTAAGACCAAAAATAAATCCCTCATTATTT  
Sb16\_Sc16 ---AATCAAATAACAACATGTAAGACCAAAAATAAATCCCTCATTATTT  
Sbay\_c654 ACCAAATCAAATAACAACATGTAAGACCAAAAC----TCCTTCATTATTT

Scer\_chr16 ATTCTTACCCTTTCCAAA-TTCTTACTATACTAGTAAATATATATTTAA  
Sb16\_Sc16 ATTCTTACCCTTTCCAAA-TTCTTACTATACTAGTAAATATATATTTAA  
Sbay\_c654 ATTCTTATCTTTTTCAAAATTCTTATTGAACTAGTAAATATATATTTAA

Scer\_chr16 TTATCCTTTTTCTACTTCAGCAT-ACAATCCTTCTTTTTGCCGCAGGTTT  
Sb16\_Sc16 TTATCCTTTTTCTACTTCAGCAT-ACAATCCTTCTTTTTGCCGCAGGTTT  
Sbay\_c654 T--TCCATTCTT-TATTTAAGATTACAATTTTTCTTTTT----CAGTTTA

Scer\_chr16 ATAGTTAGACCCCTCAATTCTGTCAAGTTCAGTGGTACGTTATTTTATG  
Sb16\_Sc16 ATAGTTAGACCCCTCAATTCTGTCAAGTTCAGTGGTACGTTATTTTATG  
Sbay\_c654 CTAATTAC--G----TTTTG----GCTTCACCGGCATG--ATTACG

Scer\_chr16 TCTCATCTCAGATC-CTGGCAAAAAAGAAAGGCATGTAATTTGAGGAG  
Sb16\_Sc16 TCTCATCTCAGATC-CTGGCAAAAAAGAAAGGCATGTAATTTGAGGAG  
Sbay\_c654 -CC---CTCAGAACTCACTCAATTGTAAAAAAAGTCTTCAAAGGACC

Scer\_chr16 GCGATTACCCTCATTTTTA--CGCAACAACAATGCTGTGTGGCTTACAC  
Sb16\_Sc16 GCGATTACCCTCATTTTTA--CGCAACAACAATGCTGTGTGGCTTACAC  
Sbay\_c654 AAGGAACACACAGGACAAAGTCAAGGGACAACATGCGAAACTGA-AT

Scer\_chr16 GCCTCTGCGTACATA-TCTACATATTTAACGGTCCTGTATTTTCAAGCAC  
Sb16\_Sc16 GCCTCTGCGTACATA-TCTACATATTTAACGGTCCTGTATTTTCAAGCAC  
Sbay\_c654 ACCACTTACTACTGCTCTTCGGAAATTA-TTA-CCTCTACAGTCAAGTGC

Scer\_chr16 GCAAGGCTGAAATAAACGGTGTGTTGCTTATGCGCGAT--GCACTCCGCC  
Sb16\_Sc16 GCAAGGCTGAAATAAACGGTGTGTTGCTTATGCGCGAT--GCACTCCGCC  
Sbay\_c654 GCCCGACTG-----TGCTTTTTGAAAGCGGGACGCTACGCCGCA

Scer\_chr16 GAACATCACCGCAAAAGCACCGTAGGCGGAGATCTCCCAGC-TAGTATGG  
Sb16\_Sc16 GAACATCACCGCAAAAGCACCGTAGGCGGAGATCTCCCAGC-TAGTATGG  
Sbay\_c654 GTATTCGAACCGG---GCCACGTAAGCAAAGTGCTGTAATCCTAGTAGGG

Scer\_chr16 GCATGACGGAACCACGATTTCCAGATATAGATACTTAAAAGCACTAAAAG  
Sb16\_Sc16 GCATGACGGAACCACGATTTCCAGATATAGATACTTAAAAGCACTAAAAG  
Sbay\_c654 TCTCAGCTGA-----CGGCA---ACACATCCACAAA--TACAAACAC

Scer\_chr16 GTCTATACATAAAAACGCAGACTTACGTAAGATACATAGCAACTGCCGATA  
Sb16\_Sc16 GTCTATACATAAAAACGCAGACTTACGTAAGATACATAGCAACTGCCGATA  
Sbay\_c654 GTCT-----G----CTAATA-CAA-----

Scer\_chr16 TGGACGCCGCCATGCCGAATGACAAAGGGAGAAATGTAGTACTAATTGATA  
Sb16\_Sc16 TGGACGCCGCCATGCCGAATGACAAAGGGAGAAATGTAGTACTAATTGATA  
Sbay\_c654 --GACGCACAGTACC-----A-TGTAG--CCGAT-----

Scer\_chr16 TCGTCTTATCCTCTCAGGAATGCAAACCTAAAACATACTTTCTCCCGTCC  
Sb16\_Sc16 TCGTCTTATCCTCTCAGGAATGCAAACCTAAAACATACTTTCTCCCGTCC  
Sbay\_c654 --GTCT--CCTTTCGGATAGGAAGCCAAAAAGAACTTCTTCCGTG

Scer\_chr16 TAACAACGCCGGTTGTCGACGATAAATACCCCAAGAAATGCCGCACAGA  
Sb16\_Sc16 TAACAACGCCGGTTGTCGACGATAAATACCCCAAGAAATGCCGCACAGA  
Sbay\_c654 CAGCAACGACA-TTGGCATCG-TGCGGCCCCCAAGAAATGCCGCACCGC

Scer\_chr16 ATCTCCT--CCGTTAGGTGGTCATGCCCGAGGGTGCAGGTTGTTTCCT  
Sb16\_Sc16 ATCTCCT--CCGTTAGGTGGTCATGCCCGAGGGTGCAGGTTGTTTCCT  
Sbay\_c654 ACCGCCGTC CCGCTAAGT---CAT--CGCAAGGGTGC-C-G-----CT

Scer\_chr16 GCACGGTAAATCGGGATGCCATGAAAGCGGGCCTCCCCACGGGTCCCCT  
Sb16\_Sc16 GCACGGTAAATCGGGATGCCATGAAAGCGGTCTCTCCCCACGGGTCCCCT  
Sbay\_c654 GCACGGTAAATCTGGCT-----CGTCCCCTCCC-CTATTCTGCT

Scer\_chr16 AATTTTTTTTCCAAGTGAATATCTGCATCGGCCACGTTTATATTACTTC  
Sb16\_Sc16 AATTTTTTTTCCAAGTGAATATCTGCATCGGCCACGTTTATATTACTTC  
Sbay\_c654 CGTTATTT--GACGTACTTAACCATCAGCCCTC-TCGTACTTCACCAC

Scer\_chr16 GATAAGCTTGCCTTAACTCATTATTGCCGTGTTTTATCCCTCAAAGCTT  
Sb16\_Sc16 GATAAGCTTGCCTTAACTCATTATTGCCGTGTTTTATCCCTCAAAGCTT  
Sbay\_c654 C-TGGGCTGGCTGGG-CTCACATCTGCCGTGTTTTATCGTGAACCTT

Scer\_chr16 AATCTTACAAGAATTAGAAAAGAGAAAAGTTATTTCGTAT-AGACTTCCT  
Sb16\_Sc16 AATCTTACAAGAATTAGAAAAGAGAAAAGTTATTTCGTAT-AGACTTCCT  
Sbay\_c654 AGTCTT-CTGCTATGGAAA-----AAAACCTCAC-CGAATGAGCTTTTCT

Scer\_chr16 TATGCTGATGTCCTTCCACCCTTTACACAGTAGGATTAGTCTAGAAGT  
Sb16\_Sc16 TATGCTGATGTCCTTCCACCCTTTACACAGTAGGATTAGTCTAGAAGT  
Sbay\_c654 TCTTC-TGAT-----TCCAGTCTCTAA-----TCTGGTT-----T

Scer\_chr16 GGTAAATGCAGGATAGCATATACGCGACAAGGAAAAGAAAAGGAAA  
Sb16\_Sc16 GGTAAATGCAGGATAGCATATACGCGACAAGGAAAAGAAAAGGAAA  
Sbay\_c654 GGTGTAATACAGAACAGGAATTT-----AAGGAAA-AAAAAAGGAGTG

Scer\_chr16 ATATTTTACGTCGGAAATTGTGTGATATGCCGTTTGAATTCGAGGTATAT  
Sb16\_Sc16 ATATTTTACGTCGGAAATTGTGTGATATGCCGTTTGAATTCGAGGTATAT  
Sbay\_c654 CCCTTTCATTGGCACA---GTTTTCTCTATTTTAATTCG-GCTATAT

Scer\_chr16 TAAGCGCAGTGCTTTTCCCTGCATCGCATTCTGTCTGTCTTCCGAGTGT  
Sb16\_Sc16 TAAGCGCAGTGCTTTTCCCTGCATCGCATTCTGTCTGTCTTCCGAGTGT  
Sbay\_c654 TAAT---AAAGCTG--CCCTTCAAC-----CAGCG--TCTTCCCGTGT

Scer\_chr16 CGATTCCACAAATTCGTCTTGTCTTTTGGATATTTGTTTTTTT-TTTCC  
Sb16\_Sc16 CAATTCACAAATTCGTCTTGTCTTTTGGATATTTGTTTTCTT-TTTCC  
Sbay\_c654 C--TTGCGACATCAATGTTGTCTTTCTCTTGTCTTGCCTTCCGAATTTCC

Scer\_chr16 TTCTCTTTTTTTATTCTTTGTATTTGGTGTCTGTCTGTCAATACGGCACAT  
Sb16\_Sc16 TTCTCTTTTTTTATTCTTTGTATTTGGTGTCTGTCTGTCAATACGGCACAT  
Sbay\_c654 TTCTCGTAT-----C-TT-----CTCTC-GTGGATA---CAAAC

Scer\_chr16 AAAGTAACATGTAATTAACATAAATGCTTTCGAACGATTTCGAACGATA  
Sb16\_Sc16 AAAGTAACATGTAATTAACATAAATGCTTTCGAACGATTTCGAACGATA  
Sbay\_c654 AGAGTAACTCCTCTCTC-ACAGCATGCTTCTAACGATTTCGAACGACA

Scer\_chr16 CCGACAAGCAACATACCGTCTGGATCCTACCGGTGTGGACGACGCCTAC  
Sb16\_Sc16 CCGACAAGCAACATACCGTCTGGATCCTACCGGTGTGGACGACGCCTAC  
Sbay\_c654 CTGACAAGCAACACACCCTTGGACCCACAGGGGTGATGAC-----

Scer\_chr16 ATCCCTCCGGAGCAGCCGAAACAAAGCACCATCGCTTTAAATCTCTAG  
Sb16\_Sc16 ATCCCTCCGGAGCAGCCGAAACAAAGCACCATCGCTTTAAATCTCTAG  
Sbay\_c654 -----CGGAACAGCCGAAACTAAGCACACGCGTTTCCACATCACTAA

Scer\_chr16 GGACACCTGAGAGACCACTTTATCGTGCGGTGGTGGTGTGAGTTCTGCGGCA  
Sb16\_Sc16 GGACACCTGAGAAACCACTTTATCGTGCGGTGGTGGTGTGAGTTCTGCGGCA  
Sbay\_c654 GGATACCTTGAGAAACCACTTTATCGCCGCGCTGGCGGAGTTTGTGGTA

Scer\_chr16 CATTTCATGTTTTTATGGTGCCTTACGTTATCTGCAATGTCGCTAACCAT  
Sb16\_Sc16 CATTTCATGTTTTTATGGTGCCTTACGTTATCTGCAATGTCGCTAACCAT  
Sbay\_c654 CCTTCATGTTTTTATGGTGCCTTACGTTATCTGTAACGTCGCAACCAT

Scer\_chr16 GATGTCGCACTCGTTGCAGCGCTGACGGTTCCTCCATCCGGGTCAATTGAT  
Sb16\_Sc16 GATGTCGCACTCGTTGCAGCGCTGACGGTTCCTCCATCCGGGTCAATTGAT  
Sbay\_c654 GATGTCGCACTGACTGCGCAGCGCTGACGGTTCCTCCATCCGGGTCAATTGAT

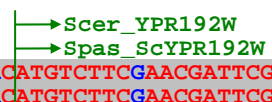

Scer\_chr16 **TATGATTGCCATCGGTTTCGGATTTCCGTCATGTTTTCTATCTGGTGT**  
 Sb16\_Sc16 **TATGATTGCCATCGGTTTCGGATTTCCGTCATGTTTTCTATCTGGTGT**  
 Sbay\_c654 **CATGATCGCTATCGGTTTCGGGTTCTCCCTCATGTTTGCCGTCTGGTGCT**

Scer\_chr16 **TGCCGGTGTCTCTGGTGGGGCTTTGAATCCTGCTATGTCGCTTTCGCTG**  
 Sb16\_Sc16 **TGCCGGTGTCTCTGGTGGGGCTTTGAATCCTGCTATGTCGCTTTCGCTG**  
 Sbay\_c654 **TCGCTGGTGTTCCTGGTGGTGTCTTTGAATCCTGCGTCTCGCTTTCCTG**

Scer\_chr16 **TGCTTGCCGAGAGCCGTCCTCCTACAAGATGTGTCGTTATGTGGGTTTC**  
 Sb16\_Sc16 **TGCTTGCCGAGAGCCGTCCTCCTACAAGATGTGTCGTTATGTGGGTTTC**  
 Sbay\_c654 **TGCTTGCCGAGAGCCATCACTCCAACAAGATGCTTGTGATGTGGTCTC**

Scer\_chr16 **GCAGATTGTTGCTGGAATGGCCGCTGGAGGCGCTGCAAGCGCCATGACAC**  
 Sb16\_Sc16 **GCAGATTGTTGCCGGAATGGCCGCTGGAGGCGCTGCAAGCGCCATGACAC**  
 Sbay\_c654 **CCAGATCATAGCCGGGATGGCCCGAGGTGGTGGCTAGTGCTATGACTC**

Scer\_chr16 **CTGGTGAAGTCCTCTTTGCCAATTCTTTGGGCCTGGGCTGCTCTAGGACG**  
 Sb16\_Sc16 **CTGGTGAAGTCCTCTTTGCCAATTCTTTGGGCCTGGGCTGCTCTAGGACG**  
 Sbay\_c654 **CCGGTAAGGTCTTTTCGCCAAGCCCTGGGCCTGGGCTGCTCTAGATCA**

Scer\_chr16 **AGGGGTCGTTTCCTGGAGATGTTCCGGCACCGCTATCCT** .....  
 Sb16\_Sc16 **AGGGGTCGTTTCCTGGAGATGTTCCGGCACCGCTATCCT** .....  
 Sbay\_c654 **AGAGGCCTGTTTCCTGGAAATGTTCCGGCACCTTCATCTT** .....

Scer\_YPR192W →  
 Spas\_ScYPR192W →

Supplementary Figure 1, Nakao *et al.*

**(A) Chromosomes without translocations**

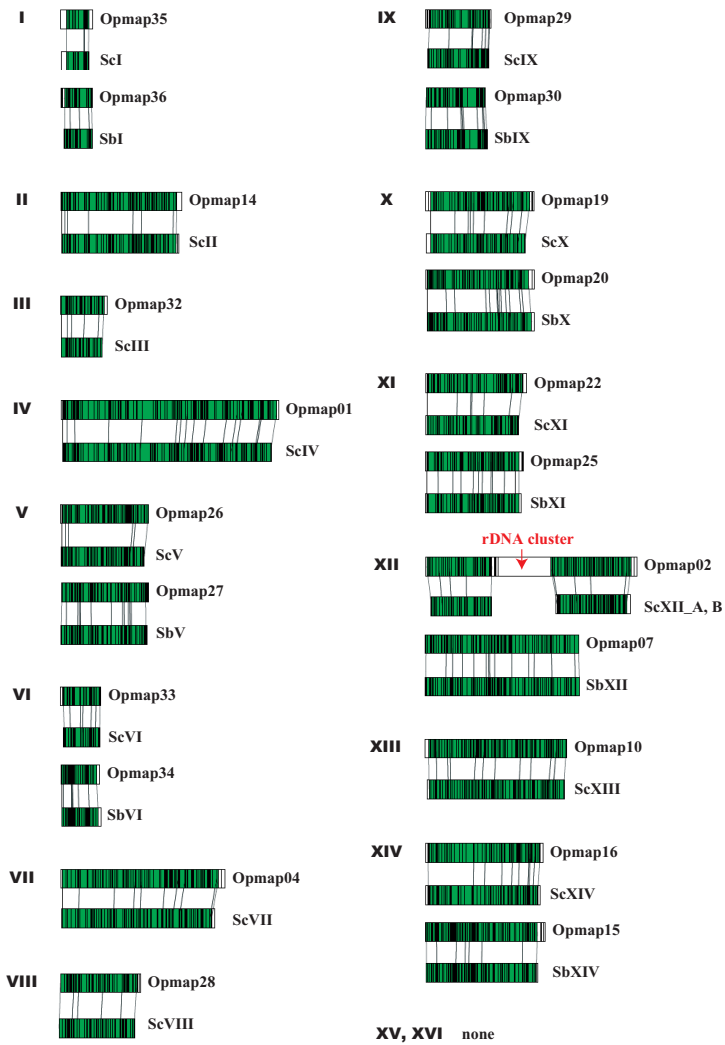

**(B) Chromosomes with translocations between Sc-type chromosomes**

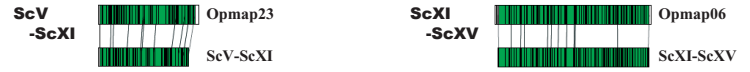

**(C) Chromosomes with translocations between Sb-type chromosomes**

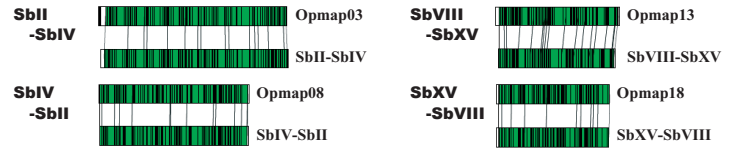

**(D) Chromosomes with translocations between Sc- and Sb-type chromosomes**

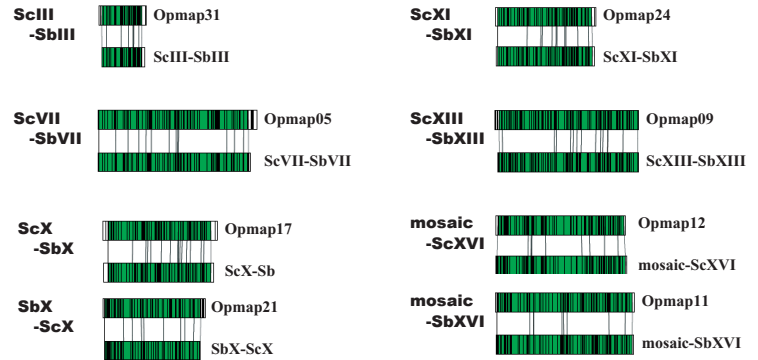

Figure S2, Nakao *et al.*

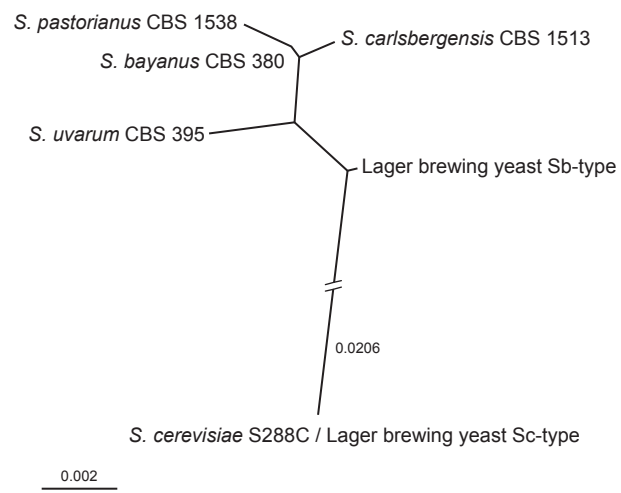

Figure S3, Nakao *et al.*
