# Supplementary material for: Genome Sequence of the Lager Brewing Yeast, an Interspecies Hybrid
Source: PubMed Central journal article supplement — DNA Res. 2009 Mar 4;16(2):115–29. doi: 10.1093/dnares/dsp003 (PMC2673734; doi:10.1093/dnares/dsp003), 2009-03-04
Supplement: dsp003_4.pdf [file dsp003_4.pdf]

Supplementary Table S4. Nucleotide sequence comparison of genes on lager brewing yeast mtDNA with *S. cerevisiae* and *S. bayanus*.

| Lager brewing yeast | <i>S. cerevisiae</i> |        | <i>S. bayanus</i> |                           |               |
|---------------------|----------------------|--------|-------------------|---------------------------|---------------|
|                     | Identity (%)         | Strain | Identity (%)      | Strain                    | Accession no. |
| <i>COX2</i>         | 93                   | S288C  | 96                | NRRL Y-12624 <sup>a</sup> | AF442211.1    |
| <i>COX3</i>         | 94                   | S288C  | 96                | CLIB 533 <sup>a</sup>     | AL400791.1    |
| <i>COB</i>          | 93                   | S288C  | -                 | -                         | -             |
| <i>AI2</i>          | 95                   | S288C  | -                 | -                         | -             |
| <i>COX1</i>         | 94                   | S288C  | -                 | -                         | -             |
| <i>ATP8</i>         | 97                   | S288C  | 98                | CBS395 <sup>a</sup>       | AF114929.1    |
| <i>ATP6</i>         | 93                   | S288C  | 96                | CLIB 533 <sup>a</sup>     | AL401695.1    |
| <i>OLI1 (ATP9)</i>  | 97                   | S288C  | 100               | CBS395 <sup>a</sup>       | AF114930.1    |
| <i>15S rRNA</i>     | 95                   | S288C  | 98                | CBS380                    | AF114901.1    |
| <i>21S rRNA</i>     | 95                   | S288C  | 96                | CLIB 533 <sup>a</sup>     | AL401386.1    |

<sup>a</sup> these strains are classified in *S. bayanus* var. *uvarum*.
